# Supplementary material for: Testing the ion-current model for flagellar length sensing and IFT regulation
Source: eLife. 2023 Jan 13;12:e82901. doi: 10.7554/eLife.82901 (PMC9891718; doi:10.7554/eLife.82901)
Supplement: Figure 2—source data 1. [file elife-82901-fig2-data1.xlsx]

## Sheet: 39 uM
39 uM Ca		Line witdh 7
	200213_061.nd2								200213_062.nd2								200213_063.nd2
Background	108.179	130.154	108.179	130.154	108.179	130.154	108.179	130.154	108.428	132.799	108.428	132.799	108.428	132.799	108.428	132.799	106.2	133.655	106.2	133.655	106.2	133.655	106.2	133.655	106.2	133.655
	mCherry	GCaMP	mCherry	GCaMP	mCherry	GCaMP	mCherry	GCaMP	mCherry	GCaMP	mCherry	GCaMP	mCherry	GCaMP	mCherry	GCaMP	mCherry	GCaMP	mCherry	GCaMP	mCherry	GCaMP	mCherry	GCaMP	mCherry	GCaMP
1	225.752	381.212	208.284	422.189	212.319	362.003	217.897	470.664	260.87	567.594	266.65	528.983	249.606	450.06	259.218	351.074	211.886	564.917	216.01	691.329	216.516	716.107	189.028	592.101	201.357	579.562
2	213.524	410.982	203.282	409.828	217.011	347.544	226.649	498.244	268.399	603.261	293.92	522.851	256.855	447.056	259.101	353.603	208.722	571.596	241.081	673.482	232.038	701.005	196.831	582.434	216.189	574.697
3	239.041	413.373	207.642	399.787	236.686	346.482	228.562	519.923	272.401	590.884	287.265	519.835	234.808	464.527	246.716	335.837	202.724	635.658	235.514	644.874	227.775	712.574	213.673	537.551	208.72	583.881
4	242.802	429.797	201.971	434.766	230.063	351.095	239.511	524.822	271.889	561.645	284.649	523.539	241.264	440.794	239.915	322.668	232.035	636.092	255.165	598.796	220.184	723.912	224.275	569.495	214.561	587.231
5	236.166	400.21	216.774	448.79	229.135	339.686	230.358	504.681	261.146	569.148	286.083	496.176	248.136	424.868	236.3	329.76	214.845	611.187	233.249	564.783	216.79	692.316	226.882	566.269	221.96	588.455
6	236.715	430.493	215.237	482.827	234.191	342.431	219.389	518.65	273.546	528.656	269.243	478.79	262.396	441.644	247.03	341.866	217.449	621.28	213.589	557.848	240.623	650.43	219.081	592.349	217.951	547.18
7	249.47	432.751	203.368	476.912	228.4	340.074	213.331	525.879	273.656	500.798	278.667	461.195	251.073	495.852	241.091	329.266	224.606	606.246	220.285	568.94	235.832	670.663	209.788	552.1	210.311	519.148
8	247.347	436.678	211.202	437.175	231.422	352.068	210.132	528.683	277.325	472.405	273.812	456.157	244.868	517.652	229.073	345.615	237.54	605.1	239.538	597.862	279.133	713.594	207.033	546.442	214.96	567.512
9	227.822	453.687	217.767	419.376	244.933	352.947	216.209	537.792	251.277	466.681	276.011	497.56	249.394	495.303	241.471	385.617	224.894	592.135	237.127	585.256	302.572	754.384	191.42	558.428	216.755	615.194
10	210.514	456.408	211.186	429.5	253.361	364.949	219.496	597.691	267.254	457.346	270.706	533.443	236.468	453.026	247.588	387.883	202.528	624.039	232.232	587.311	296.735	831.349	207.572	544.031	193.98	644.719
11	213.19	446.564	210.263	423.258	222.144	350.532	214.644	627.507	270.328	514.106	279.797	521.373	245.48	449.081	246.591	380.724	211.188	572.795	238.723	570.722	273.153	838.484	206.479	557.293	216.577	691.506
12	212.061	445.753	210.796	424.438	213.874	344.808	219.388	678.271	285.134	517.194	272.337	518.683	251.164	429.23	240.014	399.95	219.754	569.181	261.761	575.831	244.874	741.392	210.018	574.528	218.76	688.857
13	207.503	453.175	204.273	461.57	246.834	359.395	220.958	660.888	298.647	514.308	280.756	507.194	242.839	424.753	252.883	410.952	218.22	577.814	258.938	574.88	234.837	695.932	208.468	583.647	227.487	661.971
14	218.671	455.302	191.117	440.591	255.351	349.854	222.715	618.412	302.657	512.83	269.542	542.288	253.965	449.031	243.411	377.202	214.881	575.294	224.029	585.72	217.512	653.538	206.095	599.79	238.184	679.085
15	226.052	468.663	212.057	447.07	249.174	371.636	219.433	570.108	276.905	518.138	247.198	577.695	253.894	456.109	258.785	382.342	229.18	601.526	231.03	575.325	221.008	674.95	209.497	570.179	247.412	644.482
16	200.525	477.988	218.177	459.799	238.233	375.036	234.578	569.133	272.131	530.736	254.963	523.997	247.584	492.069	234.911	399.597	233.319	585.563	232.257	592.063	217.958	674.498	198.488	546.972	260.124	592.698
17	228.139	483.771	216.761	451.758	225.355	350.157	222.251	545.699	264.582	546.401	255.817	509.591	252.976	481.736	227.421	423.162	225.541	581.653	224.927	587.972	239.059	671.509	191.344	576.409	240.128	560.105
18	216.597	521.292	205.295	420.404	207.009	351.973	240.545	558.002	295.98	527.38	275.125	506.84	273.185	529.213	244.713	403.662	238.121	623.556	225.536	605.698	243.191	640.923	198.247	593.13	223.26	602.852
19	225.918	498.632	215.118	429.22	210.407	359.585	233.105	536.994	314.611	525.262	265.423	462.382	263.777	536.05	230.059	408.58	256.892	659.349	236.611	635.923	235.074	652.94	198.917	591.193	235.071	683.172
20	212.934	480.048	208.381	434.826	223.634	382.032	233.071	453.773	314.597	510.424	276.512	459.062	268.366	549.146	229.682	398.396	269.121	700.568	236.177	646.499	236.468	675.564	204.149	598.687	225.006	670.915
21	197.433	477.342	211.116	430.557	225.54	384.497	225.312	435.335	304.964	496.474	290.619	484.194	287.864	529.536	226.752	377.281	253.27	757.576	224.202	659.771	229.976	638.972	199.143	520.482	227.124	673.601
22	201.377	473.007	194.552	445.483	218.826	412.17	215.142	445.236	313.576	531.044	292.704	501.761	256.089	508.053	243.394	397.843	250.745	756.864	235.788	658.646	235.379	652.09	199.962	522.705	229.267	665.723
23	187.985	502.5	212.873	433.555	219.816	421.007	218.427	440.018	321.971	550.799	293.403	486.572	249.542	522.824	246.697	383.708	248.981	752.298	233.062	667.355	237.436	644.864	194.046	500.566	233.698	647.355
24	197.993	507.754	223.624	452.548	217.524	425.488	213.969	453.77	299.639	522.089	298.585	459.901	231.906	533.444	245.233	399.368	240.574	675.572	219.149	628.436	242.048	587.238	192.575	496.422	232.968	633.368
25	200.499	486.281	208.752	415.9	235.409	446.949	229.161	467.74	294.327	540.291	287.483	449.883	244.457	541.412	232.027	393.585	242.287	629.236	212.058	621.444	245.182	574.36	189.765	504.903	225.51	636.768
26	209.598	457.165	208.851	409.607	236.13	463.413	227.321	434.893	313.292	503.986	290.82	463.873	232.855	546.696	250.168	392.721	250.212	562.335	209.591	608.377	238.963	609.964	184.371	582.063	228.667	654.061
27	207.836	464.19	210.604	419.992	228.266	456.744	244.988	446.842	320.491	490.865	270.5	466.074	225.202	543.181	256.67	412.56	250	547.215	233.038	651.789	222.298	649.073	183.008	617.35	230.602	678.128
28	209.852	430.484	193.62	433.755	227.199	437.912	232.379	420.542	308.826	486.922	285.9	469.224	229.04	518.866	259.216	444.497	246.735	549.612	224.973	646.724	232.483	661.78	177.248	621.26	245.009	658.204
29	208.655	404.11	194.919	429.864	235.948	442.023	244.89	432.755	287.94	481.834	287.291	495.448	229.44	506.951	242.459	412.491	248.462	589.355	224.074	692.551	243.63	640.719	179.094	564.277	259.555	651.594
30	197.29	398.849	191.25	472.492	232.691	483.364	246.755	424.995	295.381	464.962	275.671	510.453	227.601	524.757	241.031	414.127	265.429	571.636	261.466	710.802	229.266	676.011	195.22	575.773	265.12	590.008
31	209.577	383.421	196.961	481.443	239.994	510.951	234.287	435.596	279.443	477.924	280.998	513.02	254.13	541.067	230.089	427.697	262.852	514.2	259.772	735.846	235.886	683.786	196.372	611.524	238.077	581.536
32	189.804	413.831	192.896	459.875	252.091	506.077	236.682	411.645	273.529	435.474	279.097	529.118	243.451	518.516	227.75	456.98	266.9	535.377	255.498	717.481	261.876	639.512	204.269	587.309	244.537	577.765
33	183.569	468.306	202.28	431.065	260.838	522.087	246.615	427.549	261.674	442.55	243.801	539.711	244.049	498.095	248.986	478.615	270.849	569.474	261.699	748.886	241.788	613.479	199.847	632.419	241.356	568.205
34	184.129	468.461	210.026	420.089	272.227	518.968	246.114	408.069	256.128	455.031	256.378	521.814	255.128	500.473	236.306	439.55	259.85	533.851	238.901	810.889	223.454	613.289	234.182	631.012	237.839	604.779
35	192.814	484.248	191.156	460.954	260.941	547.007	249.53	374.816	255.539	440.978	239.949	490.285	260.566	490.681	226.068	439.175	251.574	504.258	246.935	848.845	239.59	637.076	221.343	596.202	216.895	648.424
36	209.32	506.719	197.46	474.875	262.531	584.213	239.152	399.943	285.733	471.5	248.538	462.121	273.767	489.983	230.485	431.653	244.72	492.851	259.956	780.067	231.72	674.494	213.2	629.051	221.563	694.684
37	219.788	478.863	193.722	489.025	281.696	597.65	243.962	450.891	269.991	474.908	234.335	482.636	249.475	459.141	230.738	426.592	253.316	485.55	238.029	746.866	229.27	684.35	220.312	636.007	225.945	676.584
38	225.529	522.494	200.007	485.263	281.776	640.12	257.488	462.282	274.024	487.397	218.953	431.894	243.872	465.766	230.538	442.041	259.626	489.559	239.239	743.779	218.956	637.8	206.901	633.347	206.213	645.993
39	214.494	452.337	203.015	465.907	279.816	604.396	272.71	496.321	251.516	466.91	228.336	480.035	240.896	450.267	218.56	443.481	253.898	498.235	233.405	716.679	238.383	620.568	214.38	643.961	188.231	632.835
40	205.522	425.199	207.869	450.313	275.235	574.147	279.006	455.764	272.525	448.159	230.512	461.964	241.332	447.963	227.294	459.903	243.464	536.19	243.294	765.051	227.181	610.347	214.497	639.859	185.169	634.993
41	234.578	398.847	192.426	465.31	273.791	576.233	298.851	442.491	265.029	475.31	225.203	461.951	237.511	435.052	241.517	463.385	241.555	628.378	240.57	772.377	223.346	618.216	197.123	642.727	193.104	637.482
42	236.236	396.762	193.203	480.228	251.849	621.75	283.082	479.344	268.124	489.724	234.194	459.407	253.084	433.176	245.818	438.959	235.242	658.049	236.118	777.487	213.835	587.264	217.257	589.328	207.727	656.034
43	222.399	403.37	210.616	488.013	249.715	608.795	261.893	487.665	269.076	488.868	244.383	452.614	257.823	433.893	235.88	428.201	228.735	713.109	216.093	729.021	200.204	576.629	216.816	587.156	206.978	656.316
44	204.513	439.023	196.561	499.045	249.627	603.717	260.93	474.043	273.48	519.594	259.696	457.643	248.185	421.752	261.922	452.265	239.448	650.103	207.646	705.452	203.788	593.584	211.444	562.974	215.101	641.193
45	214.114	414.851	189.962	488.688	231.714	522.329	268.093	492.177	279.423	523.433	265.395	444.663	236.051	406.63	225.038	410.692	248.936	673.816	224.485	700.047	210.878	647.342	206.664	522.296	216.967	631.94
46	221.213	425.392	207.333	494.84	232.337	545.052	258.989	512.784	271.181	517.56	262.524	469.599	240.004	430.581	213.412	393.729	257.616	684.879	226.318	688.643	228.939	658.77	208.102	497.52	226.242	672.025
47	206.623	428.959	213.156	502.741	217.181	496.012	255.997	528.249	259.495	512.059	259.769	459.152	236.567	429.937	212.685	411.383	253.582	671.665	221.311	694.068	250.377	623.356	213.504	534.693	226.514	723.71
48	187.163	452.124	212.688	473.197	228.189	493.863	239.047	517.934	249.74	495.688	241.998	442.874	232.612	444.277	206.826	412.807	235.442	691.884	218.372	692.774	213.435	651.397	210.675	544.992	211.424	716.894
49	185.605	460.793	220.505	472.22	254.178	497.324	236.327	497.225	256.337	504.993	262.526	472.433	231.892	434.39	214.91	410.963	215.582	691.046	226.316	671.396	207.687	642.331	214.488	562.061	205.863	720.389
50	183.522	448.169	210.511	473.035	291.093	443.294	235.645	495.462	243.312	481.628	241.553	463.049	251.244	430.99	223.353	412.76	234.597	700.381	245.462	664.461	207.288	656.78	206.397	606.273	199.82	642.961
Average	212.796	449.013	205.629	451.079	240.674	449.637	237.699	493.964	278.981	504.283	265.912	488.62	247.475	477.311	237.756	403.535	238.958	608.602	234.212	665.542	233.917	661.83	204.79	576.591	222.837	634.735
SD	17.2334	36.0684	8.97453	27.1572	21.0362	95.7414	19.9212	67.0125	20.3818	37.9041	20.7135	32.2582	12.7929	42.3957	13.154	37.2556	18.2227	71.1247	14.4227	72.8996	20.7309	54.027	12.2499	40.1326	17.6698	47.3486
Background subtraction
1	117.573	251.058	100.105	292.035	104.14	231.849	109.718	340.51	152.442	434.795	158.222	396.184	141.178	317.261	150.79	218.275	105.686	431.262	109.81	557.674	110.316	582.452	82.8279	458.446	95.1565	445.907
2	105.345	280.828	95.103	279.674	108.832	217.39	118.47	368.09	159.971	470.462	185.492	390.052	148.427	314.257	150.673	220.804	102.522	437.941	134.881	539.827	125.838	567.35	90.6307	448.779	109.989	441.042
3	130.862	283.219	99.4627	269.633	128.507	216.328	120.383	389.769	163.973	458.085	178.837	387.036	126.38	331.728	138.288	203.038	96.524	502.003	129.314	511.219	121.575	578.919	107.473	403.896	102.52	450.226
4	134.623	299.643	93.7923	304.612	121.884	220.941	131.332	394.668	163.461	428.846	176.221	390.74	132.836	307.995	131.487	189.869	125.835	502.437	148.965	465.141	113.984	590.257	118.075	435.84	108.361	453.576
5	127.987	270.056	108.595	318.636	120.956	209.532	122.179	374.527	152.718	436.349	177.655	363.377	139.708	292.069	127.872	196.961	108.645	477.532	127.049	431.128	110.59	558.661	120.682	432.614	115.76	454.8
6	128.536	300.339	107.058	352.673	126.012	212.277	111.21	388.496	165.118	395.857	160.815	345.991	153.968	308.845	138.602	209.067	111.249	487.625	107.389	424.193	134.423	516.775	112.881	458.694	111.751	413.525
7	141.291	302.597	95.1893	346.758	120.221	209.92	105.152	395.725	165.228	367.999	170.239	328.396	142.645	363.053	132.663	196.467	118.406	472.591	114.085	435.285	129.632	537.008	103.588	418.445	104.111	385.493
8	139.168	306.524	103.023	307.021	123.243	221.914	101.953	398.529	168.897	339.606	165.384	323.358	136.44	384.853	120.645	212.816	131.34	471.445	133.338	464.207	172.933	579.939	100.833	412.787	108.76	433.857
9	119.643	323.533	109.588	289.222	136.754	222.793	108.03	407.638	142.849	333.882	167.583	364.761	140.966	362.504	133.043	252.818	118.694	458.48	130.927	451.601	196.372	620.729	85.2196	424.773	110.555	481.539
10	102.335	326.254	103.007	299.346	145.182	234.795	111.317	467.537	158.826	324.547	162.278	400.644	128.04	320.227	139.16	255.084	96.3278	490.384	126.032	453.656	190.535	697.694	101.372	410.376	87.7803	511.064
11	105.011	316.41	102.084	293.104	113.965	220.378	106.465	497.353	161.9	381.307	171.369	388.574	137.052	316.282	138.163	247.925	104.988	439.14	132.523	437.067	166.953	704.829	100.279	423.638	110.377	557.851
12	103.882	315.599	102.617	294.284	105.695	214.654	111.209	548.117	176.706	384.395	163.909	385.884	142.736	296.431	131.586	267.151	113.554	435.526	155.561	442.176	138.674	607.737	103.818	440.873	112.56	555.202
13	99.324	323.021	96.0943	331.416	138.655	229.241	112.779	530.734	190.219	381.509	172.328	374.395	134.411	291.954	144.455	278.153	112.02	444.159	152.738	441.225	128.637	562.277	102.268	449.992	121.287	528.316
14	110.492	325.148	82.9381	310.437	147.172	219.7	114.536	488.258	194.229	380.031	161.114	409.489	145.537	316.232	134.983	244.403	108.681	441.639	117.829	452.065	111.312	519.883	99.8946	466.135	131.984	545.43
15	117.873	338.509	103.878	316.916	140.995	241.482	111.254	439.954	168.477	385.339	138.77	444.896	145.466	323.31	150.357	249.543	122.98	467.871	124.83	441.67	114.808	541.295	103.297	436.524	141.212	510.827
16	92.346	347.834	109.998	329.645	130.054	244.882	126.399	438.979	163.703	397.937	146.535	391.198	139.156	359.27	126.483	266.798	127.119	451.908	126.057	458.408	111.758	540.843	92.2875	413.317	153.924	459.043
17	119.96	353.617	108.582	321.604	117.176	220.003	114.072	415.545	156.154	413.602	147.389	376.792	144.548	348.937	118.993	290.363	119.341	447.998	118.727	454.317	132.859	537.854	85.1441	442.754	133.928	426.45
18	108.418	391.138	97.1158	290.25	98.8302	221.819	132.366	427.848	187.552	394.581	166.697	374.041	164.757	396.414	136.285	270.863	131.921	489.901	119.336	472.043	136.991	507.268	92.0466	459.475	117.06	469.197
19	117.739	368.478	106.939	299.066	102.228	229.431	124.926	406.84	206.183	392.463	156.995	329.583	155.349	403.251	121.631	275.781	150.692	525.694	130.411	502.268	128.874	519.285	92.7167	457.538	128.871	549.517
20	104.755	349.894	100.202	304.672	115.455	251.878	124.892	323.619	206.169	377.625	168.084	326.263	159.938	416.347	121.254	265.597	162.921	566.913	129.976	512.844	130.268	541.909	97.949	465.032	118.806	537.26
21	89.2541	347.188	102.937	300.403	117.361	254.343	117.133	305.181	196.536	363.675	182.191	351.395	179.436	396.737	118.325	244.482	147.07	623.921	118.002	526.116	123.776	505.317	92.9434	386.827	120.924	539.946
22	93.1983	342.853	86.3731	315.329	110.647	282.016	106.963	315.082	205.148	398.245	184.276	368.962	147.661	375.254	134.966	265.044	144.545	623.209	129.588	524.991	129.179	518.435	93.7618	389.05	123.067	532.068
23	79.8062	372.346	104.694	303.401	111.637	290.853	110.248	309.864	213.543	418	184.975	353.773	141.114	390.025	138.269	250.909	142.781	618.643	126.862	533.7	131.236	511.209	87.8459	366.911	127.498	513.7
24	89.8142	377.6	115.445	322.394	109.345	295.334	105.79	323.616	191.211	389.29	190.157	327.102	123.478	400.645	136.805	266.569	134.374	541.917	112.949	494.781	135.848	453.583	86.3751	362.767	126.768	499.713
25	92.3204	356.127	100.573	285.746	127.23	316.795	120.982	337.586	185.899	407.492	179.055	317.084	136.029	408.613	123.599	260.786	136.087	495.581	105.858	487.789	138.982	440.705	83.5648	371.248	119.31	503.113
26	101.419	327.011	100.672	279.453	127.951	333.259	119.142	304.739	204.864	371.187	182.392	331.074	124.427	413.897	141.74	259.922	144.012	428.68	103.391	474.722	132.763	476.309	78.1714	448.408	122.467	520.406
27	99.6573	334.036	102.425	289.838	120.087	326.59	136.809	316.688	212.063	358.066	162.072	333.275	116.774	410.382	148.242	279.761	143.8	413.56	126.838	518.134	116.098	515.418	76.8078	483.695	124.402	544.473
28	101.673	300.33	85.4409	303.601	119.02	307.758	124.2	290.388	200.398	354.123	177.472	336.425	120.612	386.067	150.788	311.698	140.535	415.957	118.773	513.069	126.283	528.125	71.048	487.605	138.809	524.549
29	100.476	273.956	86.7403	299.71	127.769	311.869	136.711	302.601	179.512	349.035	178.863	362.649	121.012	374.152	134.031	279.692	142.262	455.7	117.874	558.896	137.43	507.064	72.8944	430.622	153.355	517.939
30	89.1106	268.695	83.0712	342.338	124.512	353.21	138.576	294.841	186.953	332.163	167.243	377.654	119.173	391.958	132.603	281.328	159.229	437.981	155.266	577.147	123.066	542.356	89.0197	442.118	158.92	456.353
31	101.398	253.267	88.7822	351.289	131.815	380.797	126.108	305.442	171.015	345.125	172.57	380.221	145.702	408.268	121.661	294.898	156.652	380.545	153.572	602.191	129.686	550.131	90.1722	477.869	131.877	447.881
32	81.6254	283.677	84.7173	329.721	143.912	375.923	128.503	281.491	165.101	302.675	170.669	396.319	135.023	385.717	119.322	324.181	160.7	401.722	149.298	583.826	155.676	505.857	98.069	453.654	138.337	444.11
33	75.3904	338.152	94.1015	300.911	152.659	391.933	138.436	297.395	153.246	309.751	135.373	406.912	135.621	365.296	140.558	345.816	164.649	435.819	155.499	615.231	135.588	479.824	93.6472	498.764	135.156	434.55
34	75.9504	338.307	101.847	289.935	164.048	388.814	137.935	277.915	147.7	322.232	147.95	389.015	146.7	367.674	127.878	306.751	153.65	400.196	132.701	677.234	117.254	479.634	127.982	497.357	131.639	471.124
35	84.6353	354.094	82.9774	330.8	152.762	416.853	141.351	244.662	147.111	308.179	131.521	357.486	152.138	357.882	117.64	306.376	145.374	370.603	140.735	715.19	133.39	503.421	115.143	462.547	110.695	514.769
36	101.141	376.565	89.2807	344.721	154.352	454.059	130.973	269.789	177.305	338.701	140.11	329.322	165.339	357.184	122.057	298.854	138.52	359.196	153.756	646.412	125.52	540.839	107	495.396	115.363	561.029
37	111.609	348.709	85.5434	358.871	173.517	467.496	135.783	320.737	161.563	342.109	125.907	349.837	141.047	326.342	122.31	293.793	147.116	351.895	131.829	613.211	123.07	550.695	114.112	502.352	119.745	542.929
38	117.35	392.34	91.8283	355.109	173.597	509.966	149.309	332.128	165.596	354.598	110.525	299.095	135.444	332.967	122.11	309.242	153.426	355.904	133.039	610.124	112.756	504.145	100.701	499.692	100.013	512.338
39	106.315	322.183	94.8356	335.753	171.637	474.242	164.531	366.167	143.088	334.111	119.908	347.236	132.468	317.468	110.132	310.682	147.698	364.58	127.205	583.024	132.183	486.913	108.18	510.306	82.0312	499.18
40	97.3427	295.045	99.6905	320.159	167.056	443.993	170.827	325.61	164.097	315.36	122.084	329.165	132.904	315.164	118.866	327.104	137.264	402.535	137.094	631.396	120.981	476.692	108.297	506.204	78.9688	501.338
41	126.399	268.693	84.2474	335.156	165.612	446.079	190.672	312.337	156.601	342.511	116.775	329.152	129.083	302.253	133.089	330.586	135.355	494.723	134.37	638.722	117.146	484.561	90.9233	509.072	86.9043	503.827
42	128.057	266.608	85.024	350.074	143.67	491.596	174.903	349.19	159.696	356.925	125.766	326.608	144.656	300.377	137.39	306.16	129.041	524.394	129.918	643.832	107.635	453.609	111.057	455.673	101.527	522.379
43	114.22	273.216	102.437	357.859	141.536	478.641	153.714	357.511	160.648	356.069	135.955	319.815	149.395	301.094	127.452	295.402	122.535	579.454	109.893	595.366	94.004	442.974	110.616	453.501	100.778	522.661
44	96.3339	308.869	88.3822	368.891	141.448	473.563	152.751	343.889	165.052	386.795	151.268	324.844	139.757	288.953	153.494	319.466	133.248	516.448	101.446	571.797	97.588	459.929	105.244	429.319	108.901	507.538
45	105.935	284.697	81.7834	358.534	123.535	392.175	159.914	362.023	170.995	390.634	156.967	311.864	127.623	273.831	116.61	277.893	142.736	540.161	118.285	566.392	104.678	513.687	100.464	388.641	110.767	498.285
46	113.034	295.238	99.1544	364.686	124.158	414.898	150.81	382.63	162.753	384.761	154.096	336.8	131.576	297.782	104.984	260.93	151.416	551.224	120.118	554.988	122.739	525.115	101.902	363.865	120.042	538.37
47	98.4437	298.805	104.977	372.587	109.002	365.858	147.818	398.095	151.067	379.26	151.341	326.353	128.139	297.138	104.257	278.584	147.382	538.01	115.111	560.413	144.177	489.701	107.304	401.038	120.314	590.055
48	78.9845	321.97	104.509	343.043	120.01	363.709	130.868	387.78	141.312	362.889	133.57	310.075	124.184	311.478	98.3979	280.008	129.242	558.229	112.172	559.119	107.235	517.742	104.475	411.337	105.224	583.239
49	77.4257	330.639	112.326	342.066	145.999	367.17	128.148	367.071	147.909	372.194	154.098	339.634	123.464	301.591	106.482	278.164	109.382	557.391	120.116	537.741	101.487	508.676	108.288	428.406	99.6627	586.734
50	75.3427	318.015	102.332	342.881	182.914	313.14	127.466	365.308	134.884	348.829	133.125	330.25	142.816	298.191	114.925	279.961	128.397	566.726	139.262	530.806	101.088	523.125	100.197	472.618	93.6199	509.306
Average	104.617	318.859	97.4504	320.925	132.495	319.483	129.52	363.81	170.553	371.484	157.484	355.821	139.047	344.512	129.328	270.736	132.758	474.947	128.012	531.887	127.717	528.175	98.5898	442.936	116.637	501.08
SD	17.2334	36.0684	8.97453	27.1572	21.0362	95.7414	19.9212	67.0125	20.3818	37.9041	20.7135	32.2582	12.7929	42.3957	13.154	37.2556	18.2227	71.1247	14.4227	72.8996	20.7309	54.027	12.2499	40.1326	17.6698	47.3486

## Sheet: 1.35 uM
1.35 uM Ca		Line witdh 7
	200213_071.nd2				200213_072.nd2				200213_073.nd2				200213_074.nd2								200213_075.nd2
Background	108.462	130.807	108.462	130.807	107.936	129.457	107.936	129.457	107.853	132.558	107.853	132.558	107.809	128.917	107.809	128.917	107.809	128.917	107.809	128.917	107.666	131.342	107.666	131.342	107.666	131.342
	mCherry	GCaMP	mCherry	GCaMP	mCherry	GCaMP	mCherry	GCaMP	mCherry	GCaMP	mCherry	GCaMP	mCherry	GCaMP	mCherry	GCaMP	mCherry	GCaMP	mCherry	GCaMP	mCherry	GCaMP	mCherry	GCaMP	mCherry	GCaMP
1	219.231	442.105	206.076	483.947	202.087	326.38	197.709	354.177	238.802	435.136	170.202	453.496	207.259	484.014	225.71	470.205	268.944	491.625	250.674	483.134	280.057	465.962	278.801	644.411	247.855	548.948
2	244.013	452.443	210.282	468.846	214.348	357.997	195.049	357.526	241.732	475.61	175.992	434.986	222.669	466.714	226.349	451.896	243.307	505.737	247.327	484.051	268.689	447.891	301.262	702.595	251.057	504.385
3	236.805	451.501	210.415	450.016	204.088	347.994	182.49	350.039	264.759	483.061	186.18	441.252	235.591	499.985	262.53	439.976	267.963	483.717	262.913	472.862	281.676	471.775	298.042	667.096	249.607	503.375
4	235.113	451.867	213.537	448.52	209.518	369.444	195.74	341.579	243.481	484.902	189.722	455.649	223.642	494.582	255.696	450.569	284.65	484.714	267.759	457.129	286.489	471.822	308.762	617.163	223.965	519.434
5	214.456	441.395	218.192	414.893	216.303	400.43	180.203	346.084	236.062	500.862	180.382	473.025	215.328	514.027	243.898	426.689	282.352	481.927	266.044	468.402	275.61	492.019	314.929	586.943	229.932	533.94
6	232.907	442.868	231.818	392.632	225.274	401.635	175.551	326.107	232.711	465.867	186.665	436.222	217.14	515.297	239.616	443.03	279.188	481.251	259.006	500.213	269.516	508.359	327.763	586.655	234.165	545.082
7	233.644	436.478	233.07	445.023	224.394	443.206	179.222	327.177	256.244	454.168	199.054	437.893	206.235	514.125	246.978	437.454	290.394	451.408	255.743	505.88	248.671	518.654	289.507	549.238	247.168	539.647
8	242.497	447.86	226.596	457.599	206.762	435.73	198.11	328.246	251.239	477.738	197.761	417.577	216.268	575.24	259.507	432.892	292.93	464.951	251.114	466.446	268.038	537.065	286.735	561.382	243.91	531.473
9	240.719	455.969	230.019	433.194	226.645	435.294	199.011	332.549	241.073	476.548	196.843	424.771	216.371	546.006	248.054	413.572	287.82	423.04	247.986	466.895	277.028	510.24	281.674	604.406	241.216	550.785
10	239.489	467.772	225.859	414.068	209.939	412.787	180.76	337.221	235.505	493.902	205.843	413.761	196.671	541.254	259.274	463.778	274.105	407.083	246.609	509.796	251.173	501.788	276.917	615.722	244.477	589.103
11	236.866	471.447	240.5	415.08	224.663	386.221	185.044	334.711	250.301	452.161	187.807	436.609	210.548	501.481	277.256	466.592	256.184	380.716	250.202	501.896	276.568	486.925	271.671	634.504	227.08	559.782
12	242.833	447.153	230.876	427.696	237.054	391.749	188.772	346.584	240.435	450.932	196.814	431.39	210.399	486.303	249.953	458.186	260.22	374.933	247.571	497.099	265.759	473.874	272.693	635.175	242.738	556.353
13	231.326	471.156	218.19	416.495	241.124	426.883	183.491	378.553	230.119	443.954	202.328	424.231	208.498	507.42	247.66	477.972	280.284	390.351	243.615	502.913	271.458	469.472	265.912	611.108	249.04	553.845
14	242.101	454.593	203.163	406.273	234.222	415.959	186.949	350.337	243.886	437.431	202.869	417.687	194.112	559.638	259.21	507.069	272.061	442.917	241.017	493.873	289.622	479.484	262.228	607.717	249.825	526.552
15	252.128	436.822	222.566	414.135	213.798	419.931	168.835	325.103	240.892	463.369	190.256	441.784	189.991	581.332	281.764	512.892	254.268	432.386	265.136	479.162	269.038	441.909	245.855	613.575	243.981	531.66
16	240.94	432.778	206.553	425.507	210.901	420.119	189.243	311.46	238.57	439.574	195.059	422.401	189.914	586.68	260.805	552.542	253.115	462.701	250.38	429.749	280.956	452.954	242.416	616.575	237.732	549.017
17	238.509	441.148	211.57	445.767	218.47	440.967	195.208	328.453	251.805	488.231	181.817	422.627	196.566	614.064	271.252	553.594	240.846	465.703	260.911	455.268	294.729	486.055	288.336	560.814	233.999	556.671
18	248.323	439.728	216.141	432.159	224.028	458.285	207.035	309.825	249.154	507.02	187.205	422.504	189.737	582.836	273.3	495.326	252.85	467.221	258.275	464.191	299.767	505.314	267.586	623.881	233.123	605.283
19	272.075	445.912	202.462	432.43	224.235	435.064	204.451	317.284	248.769	522.746	183.077	423.256	208.708	548.932	251.475	462.892	249.321	474.334	249.294	452.709	315.394	522.453	275.935	669.419	228.186	548.148
20	250.63	455.441	213.543	449.01	207.565	474.578	202.879	355.394	232.982	520.058	180.657	428.553	197.24	504.842	243.963	477.684	245.754	462.511	238.477	453.873	301.392	514.561	283.691	631.71	221.728	512.235
21	251.164	500.812	209.748	433.446	215.75	466.159	206.566	337.866	242.13	489.177	187.167	419.891	206.463	449.891	237.482	526.07	263.681	473.989	274.497	466.67	287.64	505.526	289.257	579.7	232.826	497.179
22	247.224	461.573	223.875	426.294	232.336	462.46	199.453	318.813	241.997	454.412	185.332	398.751	219.833	458.487	233.603	491.85	250.209	472.08	252.198	453.246	283.499	506.248	286.11	569.187	240.903	524.208
23	259.465	467.884	217.914	417.906	227.178	442.294	202.573	315.235	232.249	454.48	185.849	394.508	212.406	505.143	225.755	460.61	267.593	448.899	268.249	461.03	287.875	461.159	271.414	612.829	251.773	595.184
24	244.95	465.6	214.918	426.361	239.065	436.376	206.481	343.246	233.45	466.509	184.931	390.758	208.073	495.397	226.573	437.285	268.234	467.434	280.237	463.186	322.373	474.662	284.919	608.37	250.905	628.084
25	232.078	457.066	224.816	451.7	232.885	429.878	204.457	351.121	239.639	464.367	186.476	384.334	201.784	462.408	228.706	453.803	230.651	476.783	290.343	498.368	315.667	511.137	283.182	614.347	242.336	624.246
26	241.222	478.4	217.114	471.401	225.881	420.458	211.019	321.134	255.33	447.039	172.405	378.668	215.576	470.53	219.835	443.927	261.851	520.358	275.603	512.044	302.981	524.823	276.056	606.57	244.492	584.554
27	236.882	461.473	211.682	482.751	227.822	417.233	200.106	339.694	236.985	441.847	176.739	375.44	227.411	500.229	232.688	419.521	236.484	485.125	260.786	515.337	294.805	581.098	264.912	613.947	235.134	560.597
28	230.984	445.645	215.674	502.333	214.777	411.415	191.849	326.676	242.211	456.921	181.966	402.401	216.306	495.663	250.823	432.781	224.903	485.192	239.241	488.567	275.292	562.304	279.758	601.016	230.882	590.523
29	232.694	462.876	203.451	511.325	230.251	408.381	198.494	332.577	238.7	461.795	170.347	386.033	216.44	477.738	227.45	459.591	233.823	484.188	253.92	461.049	286.97	503.646	274.973	619.74	217.793	598.155
30	235.178	478.359	212.468	513.416	240.327	386.213	189.157	350.697	223.531	450.813	181.905	409.464	230.907	501.051	231.579	479.287	235.804	492.579	256.881	418.825	272.393	455.702	263.622	608.168	218.731	596.31
31	232.068	513.374	209.108	520.605	256.476	412.359	186.924	344.872	217.804	460.585	174.55	414.805	220.187	507.062	227.277	488.455	219.174	485.72	263.359	431.002	267.867	404.708	264.076	613.252	197.265	662.511
32	243.82	518.56	194.266	517.82	242.512	419.766	197.52	357.012	228.42	463.98	163.689	422.74	207.634	519.448	239.187	474.466	208.178	441.325	254.817	463.704	257.211	394.019	263.77	662.268	203.482	698.849
33	228.777	499.641	206.639	508.731	237.7	402.755	190.586	330.89	237.251	454.999	152.715	403.986	207.828	547.131	241.458	487.041	235.32	425.675	247.513	482.519	274.749	428.101	251.067	641.285	220.582	710.077
34	258.951	472.005	196.3	503.319	229.077	411.396	199.735	353.906	232.38	475.538	168.368	401.865	216.022	513.446	230.465	525.096	242.278	443.529	258.703	483.797	262.743	444.514	270.895	674.934	232.73	667.808
35	262.265	478.025	197.626	503.303	230.823	406.594	195.127	330.448	241.705	472.063	170.185	424.43	216.887	489.177	232.58	515.636	239.844	475.652	240.392	506.566	262.875	450.794	291.119	615.239	222.19	668.203
36	236.6	468.863	185.186	510.846	221.891	389.167	194.99	333.545	234.046	511.116	184.023	403.082	219.119	519.869	226.623	481.14	254.473	517.059	257.906	519.029	258.877	429.187	318.184	567.395	227.699	634.689
37	235.116	492.034	186.472	531.328	238.603	409.753	193.346	338.711	230.526	483.165	172.692	399.88	218.976	529.883	231.928	462.405	262.46	515.979	238.558	491.067	283.771	417.527	331.292	505.978	223.162	605.519
38	240.477	508.196	180.325	593.456	246.886	412.493	215.727	352.497	248.785	512.423	166.264	405.376	211.056	531.606	234.135	431.273	247.552	486.597	235.565	477.785	263.318	450.452	330.123	522.54	232.845	591.994
39	251.097	492.762	195.942	611.33	265.454	412.434	211.737	322.939	232.766	510.341	186.939	402.09	200.842	540.725	228.854	418.283	258.568	478.626	225.019	475.385	257.7	442.333	326.251	512.014	227.671	593.044
40	225.437	450.58	186.388	632.942	224.101	428.752	202.53	331.833	236.863	510.34	176.76	403.036	205.865	545.992	237.777	445.467	263.563	493.205	223.5	517.849	278.721	425.821	332.751	550.711	227.2	641.5
41	216.173	441.824	187.376	642.21	215.386	426.113	208.97	350.554	261.248	533.929	173.162	420.971	216.042	560.172	234.105	500.501	261.346	482.089	227.682	537.801	286.08	441.17	313.051	625.786	226.376	755.277
42	242.692	432.254	190.734	581.747	219	417.751	205.853	339.387	283.428	548.019	168.547	423.761	215.382	567.843	219.525	537.552	261.75	472.549	230.983	500.372	265.764	427.992	312.562	693.934	227.155	734.608
43	226.092	465.652	175.671	550.154	218.246	392.287	209.417	348.366	265.259	566.229	170.794	398.511	215.441	574.561	237.379	484.612	264.757	422.806	210.722	488.329	274.492	460.205	325.047	707.42	222.07	801.13
44	230.105	478.915	184.155	529.899	228.285	392.34	190.307	358.809	247.171	531.012	162.906	410.241	207.416	528.253	219.694	478.158	240.608	412.178	204.149	415.644	276.838	505.119	322.797	700.778	212.609	794.851
45	236.13	497.056	192.73	550.547	233.123	366.078	189.95	361.339	243.584	500.012	162.755	403.087	200.828	522.04	222.06	468.922	250.97	427.241	209.948	404.703	279.874	539.534	307.377	661.251	213.315	794.763
46	226.572	475.824	204.314	567.048	217.838	396.215	183.292	376.271	234.772	500.355	161.089	376.255	212.37	498.101	214.434	448.703	240.111	429.227	239.883	409.566	284.99	522.173	278.742	621.004	213.245	781.686
47	236.595	455.684	179.48	589.762	209.333	380.402	182.43	373.637	226.245	476.23	160.755	408.596	214.619	512.019	235.812	439.739	225.828	453.236	221.746	437.443	265.615	515.035	282.904	616.728	207.396	781.796
48	234.662	493.185	186.741	582.323	213.625	375.434	192.241	383.091	241.503	461.784	163.358	416.51	220.961	447.954	254.93	424.55	244.996	524.259	216.259	449.027	264.471	486.33	285.985	640.473	213.709	667.654
49	233.382	458.462	195.458	598.428	211.317	366.415	201.898	406.873	231.614	443.361	167.319	443.1	224.221	439.641	248.532	419.181	259.143	507.062	209.708	431.12	285.056	479.926	278.283	665.938	210.353	688.366
50	255.657	461.696	193.535	620.194	195.366	369.987	192.39	398.304	228.144	441.391	169.334	428.765	225.687	422.879	234.955	435.881	257.072	515.538	233.34	418.986	295.234	481.404	276.866	716.117	213.876	715.719
Average	239.182	464.414	207.031	491.124	224.335	409.4	195.017	343.775	241.165	478.35	179.717	416.22	211.709	515.182	241.009	467.332	254.956	464.908	247.235	472.511	278.947	479.824	287.561	617.78	230.43	613.096
SD	11.3291	21.8908	15.9102	69.4832	13.8777	30.5138	10.2693	20.8497	11.6722	31.0257	12.5742	20.7008	10.4121	41.3544	16.0157	35.291	18.8002	35.6879	19.0362	31.5768	16.0611	40.0909	23.2727	47.9099	13.8287	87.6008
Background subtraction
1	110.769	311.298	97.614	353.14	94.1507	196.923	89.7727	224.72	130.949	302.578	62.3492	320.938	99.4498	355.097	117.901	341.288	161.135	362.708	142.865	354.217	172.391	334.62	171.135	513.069	140.189	417.606
2	135.551	321.636	101.82	338.039	106.412	228.54	87.1131	228.069	133.879	343.052	68.1391	302.428	114.86	337.797	118.54	322.979	135.498	376.82	139.518	355.134	161.023	316.549	193.596	571.253	143.391	373.043
3	128.343	320.694	101.953	319.209	96.1516	218.537	74.5538	220.582	156.906	350.503	78.3271	308.694	127.782	371.068	154.721	311.059	160.154	354.8	155.105	343.945	174.01	340.433	190.376	535.754	141.941	372.033
4	126.651	321.06	105.075	317.713	101.582	239.987	87.8039	212.122	135.628	352.344	81.869	323.091	115.833	365.665	147.887	321.652	176.841	355.797	159.95	328.212	178.823	340.48	201.096	485.821	116.299	388.092
5	105.994	310.588	109.73	284.086	108.367	270.973	72.2674	216.627	128.209	368.304	72.5291	340.467	107.519	385.11	136.089	297.772	174.543	353.01	158.235	339.485	167.944	360.677	207.263	455.601	122.266	402.598
6	124.445	312.061	123.356	261.825	117.338	272.178	67.615	196.65	124.858	333.309	78.8124	303.664	109.331	386.38	131.807	314.113	171.379	352.334	151.197	371.296	161.85	377.017	220.097	455.313	126.499	413.74
7	125.182	305.671	124.608	314.216	116.458	313.749	71.2856	197.72	148.391	321.61	91.2012	305.335	98.4258	385.208	139.169	308.537	182.585	322.491	147.934	376.963	141.005	387.312	181.841	417.896	139.502	408.305
8	134.035	317.053	118.134	326.792	98.8261	306.273	90.1737	198.789	143.386	345.18	89.9084	285.019	108.459	446.323	151.698	303.975	185.121	336.034	143.305	337.529	160.373	405.723	179.069	430.04	136.244	400.131
9	132.257	325.162	121.557	302.387	118.709	305.837	91.0753	203.092	133.22	343.99	88.9899	292.213	108.562	417.089	140.245	284.655	180.011	294.123	140.177	337.978	169.362	378.898	174.008	473.064	133.55	419.443
10	131.027	336.965	117.397	283.261	102.003	283.33	72.8237	207.764	127.652	361.344	97.9899	281.203	88.8622	412.337	151.465	334.861	166.296	278.166	138.8	380.879	143.507	370.446	169.251	484.38	136.811	457.761
11	128.404	340.64	132.038	284.273	116.727	256.764	77.1077	205.254	142.448	319.603	79.9537	304.051	102.739	372.564	169.447	337.675	148.375	251.799	142.393	372.979	168.902	355.583	164.005	503.162	119.414	428.44
12	134.371	316.346	122.414	296.889	129.118	262.292	80.8358	217.127	132.582	318.374	88.9606	298.832	102.59	357.386	142.144	329.269	152.411	246.016	139.762	368.182	158.093	342.532	165.027	503.833	135.072	425.011
13	122.864	340.349	109.728	285.688	133.188	297.426	75.5549	249.096	122.266	311.396	94.4751	291.673	100.689	378.503	139.851	349.055	172.475	261.434	135.806	373.996	163.792	338.13	158.246	479.766	141.374	422.503
14	133.639	323.786	94.7013	275.466	126.286	286.502	79.0126	220.88	136.033	304.873	95.0157	285.129	86.3025	430.721	151.401	378.152	164.252	314	133.208	364.956	181.956	348.142	154.562	476.375	142.159	395.21
15	143.666	306.015	114.104	283.328	105.862	290.474	60.8993	195.646	133.039	330.811	82.4025	309.226	82.1816	452.415	173.955	383.975	146.459	303.469	157.327	350.245	161.372	310.567	138.189	482.233	136.315	400.318
16	132.478	301.971	98.0913	294.7	102.965	290.662	81.3073	182.003	130.717	307.016	87.2064	289.843	82.1053	457.763	152.996	423.625	145.306	333.784	142.571	300.832	173.29	321.612	134.75	485.233	130.066	417.675
17	130.047	310.341	103.108	314.96	110.534	311.51	87.2716	198.996	143.952	355.673	73.9638	290.069	88.7573	485.147	163.443	424.677	133.037	336.786	153.102	326.351	187.063	354.713	180.67	429.472	126.333	425.329
18	139.861	308.921	107.679	301.352	116.092	328.828	99.0987	180.368	141.301	374.462	79.3519	289.946	81.928	453.919	165.491	366.409	145.041	338.304	150.466	335.274	192.101	373.972	159.92	492.539	125.457	473.941
19	163.613	315.105	94.0004	301.623	116.299	305.607	96.5151	187.827	140.916	390.188	75.2235	290.698	100.899	420.015	143.666	333.975	141.512	345.417	141.485	323.792	207.728	391.111	168.269	538.077	120.52	416.806
20	142.168	324.634	105.081	318.203	99.6295	345.121	94.9432	225.937	125.129	387.5	72.8045	295.995	89.4315	375.925	136.154	348.767	137.945	333.594	130.668	324.956	193.726	383.219	176.025	500.368	114.062	380.893
21	142.702	370.005	101.286	302.639	107.814	336.702	98.6296	208.409	134.277	356.619	79.3137	287.333	98.654	320.974	129.673	397.153	155.872	345.072	166.688	337.753	179.974	374.184	181.591	448.358	125.16	365.837
22	138.762	330.766	115.413	295.487	124.4	333.003	91.5172	189.356	134.144	321.854	77.4794	266.193	112.024	329.57	125.794	362.933	142.4	343.163	144.389	324.329	175.833	374.906	178.444	437.845	133.237	392.866
23	151.003	337.077	109.452	287.099	119.242	312.837	94.6366	185.778	124.396	321.922	77.9955	261.95	104.597	376.226	117.946	331.693	159.784	319.982	160.44	332.113	180.209	329.817	163.748	481.487	144.107	463.842
24	136.488	334.793	106.456	295.554	131.129	306.919	98.5451	213.789	125.597	333.951	77.0781	258.2	100.264	366.48	118.764	308.368	160.425	338.517	172.428	334.269	214.707	343.32	177.253	477.028	143.239	496.742
25	123.616	326.259	116.354	320.893	124.949	300.421	96.521	221.664	131.786	331.809	78.6235	251.776	93.9748	333.491	120.897	324.886	122.842	347.866	182.534	369.451	208.001	379.795	175.516	483.005	134.67	492.904
26	132.76	347.593	108.652	340.594	117.945	291.001	103.083	191.677	147.477	314.481	64.5521	246.11	107.767	341.613	112.026	315.01	154.042	391.441	167.794	383.127	195.315	393.481	168.39	475.228	136.826	453.212
27	128.42	330.666	103.22	351.944	119.886	287.776	92.1697	210.237	129.132	309.289	68.8856	242.882	119.602	371.312	124.879	290.604	128.675	356.208	152.977	386.42	187.139	449.756	157.246	482.605	127.468	429.255
28	122.522	314.838	107.212	371.526	106.841	281.958	83.9131	197.219	134.358	324.363	74.1135	269.843	108.498	366.746	143.014	303.864	117.094	356.275	131.432	359.65	167.626	430.962	172.092	469.674	123.216	459.181
29	124.232	332.069	94.9886	380.518	122.315	278.924	90.5583	203.12	130.847	329.237	62.4944	253.475	108.631	348.821	119.641	330.674	126.014	355.271	146.111	332.132	179.304	372.304	167.307	488.398	110.127	466.813
30	126.716	347.552	104.006	382.609	132.391	256.756	81.2208	221.24	115.678	318.255	74.0523	276.906	123.098	372.134	123.77	350.37	127.995	363.662	149.072	289.908	164.727	324.36	155.956	476.826	111.065	464.968
31	123.606	382.567	100.646	389.798	148.54	282.902	78.9882	215.415	109.951	328.027	66.6973	282.247	112.378	378.145	119.468	359.538	111.365	356.803	155.55	302.085	160.201	273.366	156.41	481.91	89.5992	531.169
32	135.358	387.753	85.8044	387.013	134.576	290.309	89.5836	227.555	120.567	331.422	55.8362	290.182	99.8247	390.531	131.378	345.549	100.369	312.408	147.008	334.787	149.545	262.677	156.104	530.926	95.8156	567.507
33	120.315	368.834	98.1773	377.924	129.764	273.298	82.6501	201.433	129.398	322.441	44.8624	271.428	100.019	418.214	133.649	358.124	127.511	296.758	139.704	353.602	167.083	296.759	143.401	509.943	112.916	578.735
34	150.489	341.198	87.8382	372.512	121.141	281.939	91.7987	224.449	124.527	342.98	60.5148	269.307	108.213	384.529	122.656	396.179	134.469	314.612	150.894	354.88	155.077	313.172	163.229	543.592	125.064	536.466
35	153.803	347.218	89.1641	372.496	122.887	277.137	87.191	200.991	133.852	339.505	62.3319	291.872	109.078	360.26	124.771	386.719	132.035	346.735	132.583	377.649	155.209	319.452	183.453	483.897	114.524	536.861
36	128.137	338.056	76.7242	380.039	113.955	259.71	87.0536	204.088	126.193	378.558	76.1699	270.524	111.31	390.952	118.814	352.223	146.664	388.142	150.097	390.112	151.211	297.845	210.518	436.053	120.033	503.347
37	126.654	361.227	78.0098	400.521	130.667	280.296	85.41	209.254	122.673	350.607	64.839	267.322	111.167	400.966	124.119	333.488	154.651	387.062	130.749	362.15	176.105	286.185	223.626	374.636	115.496	474.177
38	132.015	377.389	71.8628	462.649	138.95	283.036	107.791	223.04	140.932	379.865	58.4114	272.818	103.247	402.689	126.326	302.356	139.743	357.68	127.756	348.868	155.652	319.11	222.457	391.198	125.179	460.652
39	142.635	361.955	87.4797	480.523	157.518	282.977	103.8	193.482	124.913	377.783	79.0856	269.532	93.0328	411.808	121.045	289.366	150.759	349.709	117.21	346.468	150.034	310.991	218.585	380.672	120.005	461.702
40	116.975	319.773	77.9257	502.135	116.165	299.295	94.5937	202.376	129.01	377.782	68.9071	270.478	98.0557	417.075	129.968	316.55	155.754	364.288	115.691	388.932	171.055	294.479	225.085	419.369	119.534	510.158
41	107.711	311.017	78.914	511.403	107.45	296.656	101.034	221.097	153.395	401.371	65.3087	288.413	108.233	431.255	126.296	371.584	153.537	353.172	119.873	408.884	178.414	309.828	205.385	494.444	118.71	623.935
42	134.23	301.447	82.2721	450.94	111.064	288.294	97.9167	209.93	175.575	415.461	60.6943	291.203	107.573	438.926	111.716	408.635	153.941	343.632	123.174	371.455	158.098	296.65	204.896	562.592	119.489	603.266
43	117.63	334.845	67.2093	419.347	110.31	262.83	101.481	218.909	157.406	433.671	62.9409	265.953	107.632	445.644	129.57	355.695	156.948	293.889	102.913	359.412	166.826	328.863	217.381	576.078	114.404	669.788
44	121.643	348.108	75.6931	399.092	120.349	262.883	82.3714	229.352	139.318	398.454	55.0535	277.683	99.6074	399.336	111.885	349.241	132.799	283.261	96.3395	286.727	169.172	373.777	215.131	569.436	104.943	663.509
45	127.668	366.249	84.2679	419.74	125.187	236.621	82.0137	231.882	135.731	367.454	54.9017	270.529	93.0188	393.123	114.251	340.005	143.161	298.324	102.139	275.786	172.208	408.192	199.711	529.909	105.649	663.421
46	118.11	345.017	95.8522	436.241	109.902	266.758	75.3559	246.814	126.919	367.797	53.2358	243.697	104.561	369.184	106.625	319.786	132.302	300.31	132.074	280.649	177.324	390.831	171.076	489.662	105.579	650.344
47	128.133	324.877	71.0183	458.955	101.397	250.945	74.4939	244.18	118.392	343.672	52.9019	276.038	106.81	383.102	128.003	310.822	118.019	324.319	113.937	308.526	157.949	383.693	175.238	485.386	99.7298	650.454
48	126.2	362.378	78.2794	451.516	105.689	245.977	84.3053	253.634	133.65	329.226	55.5054	283.952	113.152	319.037	147.121	295.633	137.187	395.342	108.45	320.11	156.805	354.988	178.319	509.131	106.043	536.312
49	124.92	327.655	86.9965	467.621	103.381	236.958	93.962	277.416	123.761	310.803	59.4659	310.542	116.412	310.724	140.723	290.264	151.334	378.145	101.899	302.203	177.39	348.584	170.617	534.596	102.687	557.024
50	147.195	330.889	85.0728	489.387	87.4297	240.53	84.4542	268.847	120.291	308.833	61.4811	296.207	117.878	293.962	127.146	306.964	149.263	386.621	125.531	290.069	187.568	350.062	169.2	584.775	106.21	584.377
Average	130.72	333.607	98.5687	360.317	116.399	279.943	87.0814	214.318	133.312	345.792	71.8641	283.662	103.9	386.265	133.2	338.415	147.147	335.991	139.426	343.594	171.281	348.482	179.895	486.438	122.764	481.754
SD	11.3291	21.8908	15.9102	69.4832	13.8777	30.5138	10.2693	20.8497	11.6722	31.0257	12.5742	20.7008	10.4121	41.3544	16.0157	35.291	18.8002	35.6879	19.0362	31.5768	16.0611	40.0909	23.2727	47.9099	13.8287	87.6008

## Sheet: 0.602 uM
0.602 uM Ca		Line witdh 7
	200213_076.nd2				200213_077.nd2						200213_078.nd2						200213_079.nd2
Background	110.718	131.667	110.718	131.667	109.776	135.212	109.776	135.212	109.776	135.212	107.092	135.776	107.092	135.776	107.092	135.776	109.602	136.132	109.602	136.132	109.602	136.132	109.602	136.132	109.602	136.132
	mCherry	GCaMP	mCherry	GCaMP	mCherry	GCaMP	mCherry	GCaMP	mCherry	GCaMP	mCherry	GCaMP	mCherry	GCaMP	mCherry	GCaMP	mCherry	GCaMP	mCherry	GCaMP	mCherry	GCaMP	mCherry	GCaMP	mCherry	GCaMP
1	234.149	480.331	264.607	393.702	191.212	502.757	201.294	286.97	237.007	408.807	221.881	424.746	253.628	464.845	230.709	481.686	225.207	397.638	224.063	329.853	256.497	474.608	227.537	351.915	255.794	372.77
2	239.957	486.712	269.407	452.135	192.956	527.513	199.982	277.632	223.755	391.474	227.911	437.552	258.077	476.886	232.752	489.921	246.068	394.322	218.929	341.547	265.543	500.648	235.672	328.386	257.303	384.581
3	251.536	552.816	270.821	461.114	194.85	544.028	201.541	281.603	220.651	407.736	213.308	426.008	279.799	486.385	238.664	450.967	221.756	406.493	220.227	353.849	273.555	488.368	267.907	338.88	231.508	387.931
4	268.079	623.182	284.813	464.108	194.991	541.496	207.621	310.046	227.055	451.899	214.847	416.929	264.865	469.157	239.572	429.181	234.462	410.839	208.78	355.376	287.41	464.971	271.542	340.721	238.486	350.521
5	277.968	620.397	296.727	463.592	181.803	536.326	210.595	316.446	231.513	439.202	225.476	426.381	273.289	441.152	242.195	418.607	226.634	384.974	208.897	374.096	283.21	456.292	272.061	348.63	247.166	378.492
6	262.891	641.349	300.673	458.125	197.903	518.479	200.109	296.144	217.479	439.838	216.483	454.49	268.693	457.142	236.75	418.355	223.423	379.9	219.725	350.652	289.59	456.729	266.411	346.356	243.095	376.199
7	259.092	645.099	300.252	435.459	191.648	509.665	214.497	298.965	241.31	444.548	212.629	437.29	257.886	493.752	242.974	429.557	227.779	376.161	216.879	349.213	279.08	430.223	262.554	335.874	238.306	350.874
8	256.843	553.319	320.507	415.558	205.351	529.457	203.975	281.65	227.102	466.047	215.166	383.023	254.892	484.616	213.659	430.935	227.694	392.943	240.971	358.963	264.301	432.69	272.98	330.35	241.716	347.836
9	242.785	549.481	287.694	463.897	196.857	541.668	209.318	286.417	236.234	455.377	215.534	366.176	255.102	417.879	220.968	437.993	227.942	372.214	251.56	357.839	273.793	408.993	254.639	340.162	240.063	349.103
10	233.258	584.827	274.386	471.285	202.705	522.366	231.294	294.36	243.806	409.684	203.499	396.811	261.288	401.383	236.696	464.877	227.577	382.625	252.361	364.233	275.217	429.084	261.085	331.951	230.1	381.448
11	248.134	594.923	274.09	479.94	208.6	498.172	224.11	280.894	223.107	424.679	207.723	400.922	246.352	379.688	233.808	472.941	217.587	396.483	261.433	358.566	269.758	447.281	250.33	358.797	218.699	386.761
12	239.78	583.739	290.711	478.478	188.009	477.881	215.846	272.995	220.176	421.965	218.318	414.952	241.74	396.455	225.492	446.929	226.954	409.085	259.843	350.952	254.619	390.843	261.569	382.394	236.245	389.329
13	232.871	571.133	309.279	486.416	188.408	496.47	209.661	287.228	208.482	457.607	219.023	432.871	251.247	389.242	219.046	419.428	217.95	407.174	253.219	333.734	248.683	369.337	275.962	419.135	241.204	361.968
14	234.867	529.834	293.307	458.228	194.809	556.718	208.766	306.99	212.998	515.491	205.255	407.127	243.854	424.767	216.317	393.665	223.844	390.327	283.381	288.141	265.352	347.528	254.821	395.803	248.941	397.762
15	250.619	548.813	300.765	486.686	189.861	562.585	217.854	291.625	194.827	553.072	212	361.613	248.488	428.202	220.29	434.573	219.444	400.286	276.974	267.86	267.331	381.034	249.079	367.89	245.601	393.582
16	263.561	571.062	303.958	507.976	199.47	552.539	208.874	300.06	196.642	564.761	214.216	361.479	263.606	456.376	227.627	457.183	229.343	412.796	268.431	273.337	258.158	441.438	265.957	330.586	262.459	363.971
17	268.159	568.826	280.312	500.446	189.419	512.825	220.229	296.361	211.454	588.479	206.181	373.718	282.812	471.211	211.274	426.956	225.404	400.946	270.973	291.231	260.167	502.326	261.273	313.513	221.18	327.022
18	243.417	584.795	284.896	486.641	187.433	512.706	216.614	313.964	223.22	620.196	201.351	365.435	274.635	428.197	217.852	414.263	229.263	383.044	257.393	308.771	231.63	450.279	272.038	328.386	240.502	337.251
19	250.889	538.691	281.939	482.453	188.718	539.564	228.286	298.148	201.7	579.644	199.825	384.151	255.729	440.634	232.098	392.922	237.865	351.073	265.271	334.298	266.698	449.979	285.976	348.692	225.7	346.968
20	254.593	511.82	284.906	504.185	189.886	501.976	209.915	291.38	213.761	549.998	207.108	425.069	255.67	436.48	218.992	399.238	253.91	354.858	289.793	336.124	259.91	417.747	263.319	326.119	259.378	335.589
21	235.273	464.003	300.58	488.68	201.138	485.994	210.895	277.108	198.277	536.566	199.923	435.227	243.87	435.196	230.529	385.436	248.796	392.064	299.476	340.079	249.306	393.964	235.596	320.434	262.237	392.723
22	235.784	468.701	283.164	431.203	209.582	511.995	201.341	277.369	189.265	548.698	216.372	415.835	238.8	429.866	232.999	410.711	246.577	429.688	270.557	332.313	248.781	396.675	232.473	320.254	236.695	403.941
23	220.911	528.01	286.022	452.721	200.954	512.924	206.554	286.056	191.27	570.046	211.745	422.185	229.673	407.915	219.737	394.783	279.053	423.772	266.912	301.391	235.331	409.82	225.83	359.256	236.142	402.143
24	209.545	571.167	297.27	425.579	216.109	494.719	210.371	273.557	193.671	539.348	206.518	397.284	230.116	399.164	246.578	432.019	272.407	407.496	267.909	278.047	273.916	406.646	242.794	396.485	208.595	398.116
25	211.201	591.383	300.835	441.568	198.188	497.262	217.105	287.338	194.977	552.844	215.715	391.36	243.914	430.094	242.031	456.209	289.577	422.416	266.486	264.992	296.269	354.789	247.483	368.012	216.26	399.534
26	210.828	650.917	281.21	479.061	202.624	491.522	226.411	290.008	197.241	568.16	209.103	364.858	243.16	478.086	255.68	446.454	293.486	419.599	255.527	260.593	270.823	342.997	251.64	374.359	204.136	430.712
27	235.297	572.001	295.846	488.277	195.16	486.483	202.928	296.337	194.5	537.377	207.455	337.265	249.153	507.659	243.074	452.782	272.173	385.381	248.275	273.356	244.486	361.119	245.647	383.722	217.889	463.026
28	234.936	514.085	312.202	481.382	195.72	488.791	218.296	306.751	203.913	489.903	220.054	332.202	246.498	501.223	241.476	460.019	269.611	368.572	240.923	288.161	230.413	390.379	249.13	400.9	249.16	456.817
29	246.873	529.696	326.371	511.869	196.856	503.165	224.12	284.569	192.765	486.032	205.509	340.669	252.055	470.35	243.802	467.698	248.109	363.331	235.229	274.628	245.73	382.824	254.792	417.997	230.032	474.32
30	246.583	547.391	329.843	515.042	191.161	500.827	216.61	306.34	202.195	493.604	220.377	352.015	284.664	474.342	248.166	442.713	256.313	374.226	248.43	276.303	243.912	374.905	261.992	403.366	234.102	457.259
31	249.177	528.029	311.698	511.732	187.213	503.228	220.736	312.386	205.962	468.574	225.436	345.375	296.924	445.869	262.221	412.042	254.97	369.692	247.386	302.667	277.487	381.573	245.129	390.457	235.708	436.366
32	250.874	532.396	315.214	522.662	182.43	507.077	227.536	320.396	201.625	501.278	209.459	391.728	305.832	429.795	234.807	397.842	252.601	389.553	247.61	313.825	312.633	416.823	261.169	373.887	225.979	412.544
33	244.939	521.822	307.395	473.926	183.431	515.558	210.551	324.994	208.459	522.32	203.101	417.373	303.519	421.816	229.458	373.977	234.611	394.094	249.092	332.317	312.008	475.68	249.632	378.379	223.614	418.275
34	270.281	552.786	311.419	430.495	170.154	544.605	198.826	320.133	200.872	486.984	207.934	461.537	289.216	463.403	240.046	391.066	240.798	387.595	243.247	350.16	290.375	474.696	252.27	345.111	235.255	421.838
35	277.918	584.955	296.631	428.802	169.961	520.731	203.955	302.048	206.613	467.162	193.608	464.617	282.015	479.586	240.185	431.807	231.993	372.402	224.746	351.306	287.285	443.11	248.667	360.351	228.243	388.063
36	282.786	589.039	290.538	471.76	161.854	515.1	221.865	291.221	200.281	499.311	209.294	479.341	273.408	529.893	237.37	450.171	226.366	373.091	218.336	367.44	287.281	411.707	253.684	381.003	260.659	399.784
37	251.772	603.235	273.987	464.591	175.79	523.352	213.796	295.399	202.053	477.02	197.025	487.985	300.262	532.095	222.66	442.237	240.43	349.255	230.671	370.462	312.743	416.418	259.679	405.998	252.397	373.237
38	252.515	628.797	267.887	452.409	187.833	518.551	216.854	288.825	194.895	471.697	199.616	465.893	290.638	497.146	218.867	425.023	228.494	324.642	228.806	360.586	288.249	415.198	279.62	439.461	233.953	386.341
39	277.041	636.524	288.612	481.77	187.514	555.661	202.37	307.328	196.041	450.301	194.13	426.323	312.04	507.18	205.832	411.905	245.654	346.139	225.861	337.943	308.986	389.859	280.934	443.573	234.174	411.839
40	289.381	655.983	289.957	518.538	178.011	528.182	212.756	275.635	193.62	437.399	182.285	444.047	301.991	543.655	205.788	415.527	219.001	314.893	233.253	323.518	302.514	391.74	292.406	408.599	223.356	399.697
41	292.753	605.271	279.634	493.102	179.54	502.524	198.911	260.595	202.212	443.975	185.702	454.036	311.213	536.052	213.284	417.434	215.826	324.293	233.122	352.238	326.017	396.238	288.398	407.361	225.169	395.794
42	277.813	537.194	278.879	444.26	179.12	473.465	209.037	263.455	194.847	454.266	183.732	463.537	327.525	508.789	206.567	399.362	236.387	311.695	248.547	342.063	299.485	415.235	282.772	414.599	234.209	406.261
43	276.439	579.181	287.409	433.986	171.88	462.1	218.735	270.254	189.26	427.573	181.442	426.126	327.498	502.461	229.404	408.375	220.538	276.318	258.536	358.183	282.138	420.163	278.643	420.442	248.761	401.937
44	278.47	544.039	294.919	421.254	173.95	414.954	215.279	278.698	191.519	411.771	180.731	389.177	338.849	530.838	235.4	414.898	219.859	307.042	254.546	382.259	282.057	438.529	256.994	403.329	239.958	339.433
45	271.473	553.974	284.395	419.419	181.669	352.45	201.811	287.255	190.515	439.141	198.038	377.592	320.789	534.379	223.028	406.674	209.768	312.295	242.927	392.789	278.393	459.118	269.396	390.984	238.67	328.718
46	256.691	522.262	261.337	409.268	190.286	363.227	211.238	299.415	192.06	449.258	204.418	369.114	294.965	523.867	210.359	448.199	211.685	309.887	226.031	377.292	278.91	447.455	281.874	362.162	239.374	320.044
47	264.365	502.095	266.14	408.985	188.301	388.555	199.25	290.997	192.547	428.212	202.725	374.548	279.374	513.646	219.581	449.75	211.171	320.133	239.783	335.675	300.08	393.717	286.681	388.987	211.524	370.659
48	246.641	508.495	281.885	387.81	182.645	380.41	199.028	285.546	194.746	412.09	211.611	400.464	290.916	489.237	222.958	470.041	209.907	318.021	240.22	341.629	301.024	382.087	278.966	415.387	197.768	396.192
49	253.23	473.464	300.415	384.836	172.097	395.729	217.814	290.641	187.023	414.82	213.278	405.779	299.477	449.88	229.108	425.572	214.298	313.381	253.703	347.355	279.073	343.647	276.739	430.43	214.292	418.27
50	250.546	419.628	312.943	374.574	182.042	427.519	212.681	287.922	192.32	403.113	205.355	403.682	278.057	473.597	229.8	456.344	211.485	321.158	252.517	334.586	259.578	370.151	284.322	417.588	222.539	416.611
Average	252.316	557.153	291.774	460	189.362	497.037	211.761	292.169	206.156	479.587	207.188	406.678	273.561	465.831	229.571	430.145	235.641	370.526	246.955	330.856	274.716	416.753	261.761	373.748	234.886	388.809
SD	19.6233	52.6307	16.1701	37.3342	11.1651	50.0019	8.70177	14.6104	15.3493	58.4773	11.4172	38.9198	27.6196	43.3881	12.8764	26.8094	20.7216	38.0839	20.6918	34.7887	22.512	40.8602	16.5766	35.5892	15.0021	35.8286
Background subtraction
1	123.431	348.664	153.889	262.035	81.4363	367.545	91.5184	151.758	127.231	273.595	114.789	288.97	146.536	329.069	123.617	345.91	115.605	261.506	114.461	193.721	146.895	338.476	117.935	215.783	146.192	236.638
2	129.239	355.045	158.689	320.468	83.1801	392.301	90.2064	142.42	113.979	256.262	120.819	301.776	150.985	341.11	125.66	354.145	136.466	258.19	109.327	205.415	155.941	364.516	126.07	192.254	147.701	248.449
3	140.818	421.149	160.103	329.447	85.0736	408.816	91.7654	146.391	110.875	272.524	106.216	290.232	172.707	350.609	131.572	315.191	112.154	270.361	110.625	217.717	163.953	352.236	158.305	202.748	121.906	251.799
4	157.361	491.515	174.095	332.441	85.215	406.284	97.8455	174.834	117.279	316.687	107.755	281.153	157.773	333.381	132.48	293.405	124.86	274.707	99.178	219.244	177.808	328.839	161.94	204.589	128.884	214.389
5	167.25	488.73	186.009	331.925	72.0273	401.114	100.819	181.234	121.737	303.99	118.384	290.605	166.197	305.376	135.103	282.831	117.032	248.842	99.295	237.964	173.608	320.16	162.459	212.498	137.564	242.36
6	152.173	509.682	189.955	326.458	88.1273	383.267	90.3332	160.932	107.703	304.626	109.391	318.714	161.601	321.366	129.658	282.579	113.821	243.768	110.123	214.52	179.988	320.597	156.809	210.224	133.493	240.067
7	148.374	513.432	189.534	303.792	81.8721	374.453	104.721	163.753	131.534	309.336	105.537	301.514	150.794	357.976	135.882	293.781	118.177	240.029	107.277	213.081	169.478	294.091	152.952	199.742	128.704	214.742
8	146.125	421.652	209.789	283.891	95.5748	394.245	94.1994	146.438	117.326	330.835	108.074	247.247	147.8	348.84	106.567	295.159	118.092	256.811	131.369	222.831	154.699	296.558	163.378	194.218	132.114	211.704
9	132.067	417.814	176.976	332.23	87.0814	406.456	99.5424	151.205	126.458	320.165	108.442	230.4	148.01	282.103	113.876	302.217	118.34	236.082	141.958	221.707	164.191	272.861	145.037	204.03	130.461	212.971
10	122.54	453.16	163.668	339.618	92.9286	387.154	121.518	159.148	134.031	274.472	96.4073	261.035	154.196	265.607	129.604	329.101	117.975	246.493	142.759	228.101	165.615	292.952	151.483	195.819	120.498	245.316
11	137.416	463.256	163.372	348.273	98.8237	362.96	114.334	145.682	113.331	289.467	100.631	265.146	139.26	243.912	126.716	337.165	107.985	260.351	151.831	222.434	160.156	311.149	140.728	222.665	109.097	250.629
12	129.062	452.072	179.993	346.811	78.2331	342.669	106.07	137.783	110.4	286.753	111.226	279.176	134.648	260.679	118.4	311.153	117.352	272.953	150.241	214.82	145.017	254.711	151.967	246.262	126.643	253.197
13	122.153	439.466	198.561	354.749	78.6324	361.258	99.8852	152.016	98.7055	322.395	111.931	297.095	144.155	253.466	111.954	283.652	108.348	271.042	143.617	197.602	139.081	233.205	166.36	283.003	131.602	225.836
14	124.149	398.167	182.589	326.561	85.0328	421.506	98.9901	171.778	103.222	380.279	98.1628	271.351	136.762	288.991	109.225	257.889	114.242	254.195	173.779	152.009	155.75	211.396	145.219	259.671	139.339	261.63
15	139.901	417.146	190.047	355.019	80.0851	427.373	108.078	156.413	85.0513	417.86	104.908	225.837	141.396	292.426	113.198	298.797	109.842	264.154	167.372	131.728	157.729	244.902	139.477	231.758	135.999	257.45
16	152.843	439.395	193.24	376.309	89.694	417.327	99.0984	164.848	86.8657	429.549	107.124	225.703	156.514	320.6	120.535	321.407	119.741	276.664	158.829	137.205	148.556	305.306	156.355	194.454	152.857	227.839
17	157.441	437.159	169.594	368.779	79.6433	377.613	110.453	161.149	101.678	453.267	99.0895	237.942	175.72	335.435	104.182	291.18	115.802	264.814	161.371	155.099	150.565	366.194	151.671	177.381	111.578	190.89
18	132.7	453.128	174.178	354.974	77.6566	377.494	106.838	178.752	113.444	484.984	94.2586	229.659	167.543	292.421	110.76	278.487	119.661	246.912	147.791	172.639	122.028	314.147	162.436	192.254	130.9	201.119
19	140.171	407.024	171.221	350.786	78.9415	404.352	118.51	162.936	91.9244	444.432	92.7329	248.375	148.637	304.858	125.006	257.146	128.263	214.941	155.669	198.166	157.096	313.847	176.374	212.56	116.098	210.836
20	143.875	380.153	174.188	372.518	80.1096	366.764	100.139	156.168	103.985	414.786	100.016	289.293	148.578	300.704	111.9	263.462	144.308	218.726	180.191	199.992	150.308	281.615	153.717	189.987	149.776	199.457
21	124.555	332.336	189.862	357.013	91.3621	350.782	101.119	141.896	88.5009	401.354	92.8315	299.451	136.778	299.42	123.437	249.66	139.194	255.932	189.874	203.947	139.704	257.832	125.994	184.302	152.635	256.591
22	125.066	337.034	172.446	299.536	99.8063	376.783	91.5649	142.157	79.4894	413.486	109.28	280.059	131.708	294.09	125.907	274.935	136.975	293.556	160.955	196.181	139.179	260.543	122.871	184.122	127.093	267.809
23	110.193	396.343	175.304	321.054	91.1778	377.712	96.7783	150.844	81.4936	434.834	104.653	286.409	122.581	272.139	112.645	259.007	169.451	287.64	157.31	165.259	125.729	273.688	116.228	223.124	126.54	266.011
24	98.8268	439.5	186.552	293.912	106.333	359.507	100.595	138.345	83.8953	404.136	99.4256	261.508	123.024	263.388	139.486	296.243	162.805	271.364	158.307	141.915	164.314	270.514	133.192	260.353	98.9925	261.984
25	100.483	459.716	190.117	309.901	88.4116	362.05	107.329	152.126	85.2007	417.632	108.623	255.584	136.822	294.318	134.939	320.433	179.975	286.284	156.884	128.86	186.667	218.657	137.881	231.88	106.658	263.402
26	100.11	519.25	170.492	347.394	92.8475	356.31	116.635	154.796	87.4651	432.948	102.011	229.082	136.068	342.31	148.588	310.678	183.884	283.467	145.925	124.461	161.221	206.865	142.038	238.227	94.5342	294.58
27	124.579	440.334	185.128	356.61	85.3838	351.271	93.1516	161.125	84.7235	402.165	100.363	201.489	142.061	371.883	135.982	317.006	162.571	249.249	138.673	137.224	134.884	224.987	136.045	247.59	108.287	326.894
28	124.218	382.418	201.484	349.715	85.9435	353.579	108.52	171.539	94.1374	354.691	112.962	196.426	139.406	365.447	134.384	324.243	160.009	232.44	131.321	152.029	120.811	254.247	139.528	264.768	139.558	320.685
29	136.155	398.029	215.653	380.202	87.0804	367.953	114.344	149.357	82.989	350.82	98.4174	204.893	144.963	334.574	136.71	331.922	138.507	227.199	125.627	138.496	136.128	246.692	145.19	281.865	120.43	338.188
30	135.865	415.724	219.125	383.375	81.3847	365.615	106.834	171.128	92.4189	358.392	113.285	216.239	177.572	338.566	141.074	306.937	146.711	238.094	138.828	140.171	134.31	238.773	152.39	267.234	124.5	321.127
31	138.459	396.362	200.98	380.065	77.4365	368.016	110.96	177.174	96.1857	333.362	118.344	209.599	189.832	310.093	155.129	276.266	145.368	233.56	137.784	166.535	167.885	245.441	135.527	254.325	126.106	300.234
32	140.156	400.729	204.496	390.995	72.6537	371.865	117.76	185.184	91.8492	366.066	102.367	255.952	198.74	294.019	127.715	262.066	142.999	253.421	138.008	177.693	203.031	280.691	151.567	237.755	116.377	276.412
33	134.221	390.155	196.677	342.259	73.6551	380.346	100.775	189.782	98.6828	387.108	96.0089	281.597	196.427	286.04	122.366	238.201	125.009	257.962	139.49	196.185	202.406	339.548	140.03	242.247	114.012	282.143
34	159.563	421.119	200.701	298.828	60.3776	409.393	89.05	184.921	91.0964	351.772	100.842	325.761	182.124	327.627	132.954	255.29	131.196	251.463	133.645	214.028	180.773	338.564	142.668	208.979	125.653	285.706
35	167.2	453.288	185.913	297.135	60.1854	385.519	94.1789	166.836	96.837	331.95	86.5158	328.841	174.923	343.81	133.093	296.031	122.391	236.27	115.144	215.174	177.683	306.978	139.065	224.219	118.641	251.931
36	172.068	457.372	179.82	340.093	52.0782	379.888	112.089	156.009	90.5055	364.099	102.202	343.565	166.316	394.117	130.278	314.395	116.764	236.959	108.734	231.308	177.679	275.575	144.082	244.871	151.057	263.652
37	141.054	471.568	163.269	332.924	66.0141	388.14	104.02	160.187	92.2771	341.808	89.9326	352.209	193.17	396.319	115.568	306.461	130.828	213.123	121.069	234.33	203.141	280.286	150.077	269.866	142.795	237.105
38	141.797	497.13	157.169	320.742	78.0572	383.339	107.078	153.613	85.1187	336.485	92.524	330.117	183.546	361.37	111.775	289.247	118.892	188.51	119.204	224.454	178.647	279.066	170.018	303.329	124.351	250.209
39	166.323	504.857	177.894	350.103	77.7379	420.449	92.5943	172.116	86.2648	315.089	87.0382	290.547	204.948	371.404	98.7397	276.129	136.052	210.007	116.259	201.811	199.384	253.727	171.332	307.441	124.572	275.707
40	178.663	524.316	179.239	386.871	68.2349	392.97	102.98	140.423	83.844	302.187	75.1932	308.271	194.899	407.879	98.6958	279.751	109.399	178.761	123.651	187.386	192.912	255.608	182.804	272.467	113.754	263.565
41	182.035	473.604	168.916	361.435	69.7638	367.312	89.1347	125.383	92.4357	308.763	78.6103	318.26	204.121	400.276	106.192	281.658	106.224	188.161	123.52	216.106	216.415	260.106	178.796	271.229	115.567	259.662
42	167.095	405.527	168.161	312.593	69.3436	338.253	99.2606	128.243	85.0706	319.054	76.6398	327.761	220.433	373.013	99.4751	263.586	126.785	175.563	138.945	205.931	189.883	279.103	173.17	278.467	124.607	270.129
43	165.721	447.514	176.691	302.319	62.1035	326.888	108.959	135.042	79.4837	292.361	74.3498	290.35	220.406	366.685	122.312	272.599	110.936	140.186	148.934	222.051	172.536	284.031	169.041	284.31	139.159	265.805
44	167.752	412.372	184.201	289.587	64.1738	279.742	105.503	143.486	81.7426	276.559	73.6386	253.401	231.757	395.062	128.308	279.122	110.257	170.91	144.944	246.127	172.455	302.397	147.392	267.197	130.356	203.301
45	160.755	422.307	173.677	287.752	71.8926	217.238	92.0348	152.043	80.7392	303.929	90.946	241.816	213.697	398.603	115.936	270.898	100.166	176.163	133.325	256.657	168.791	322.986	159.794	254.852	129.068	192.586
46	145.973	390.595	150.619	277.601	80.5104	228.015	101.462	164.203	82.2836	314.046	97.326	233.338	187.873	388.091	103.267	312.423	102.083	173.755	116.429	241.16	169.308	311.323	172.272	226.03	129.772	183.912
47	153.647	370.428	155.422	277.318	78.5246	253.343	89.4743	155.785	82.7708	293	95.6326	238.772	172.282	377.87	112.489	313.974	101.569	184.001	130.181	199.543	190.478	257.585	177.079	252.855	101.922	234.527
48	135.923	376.828	171.167	256.143	72.8694	245.198	89.2521	150.334	84.9701	276.878	104.519	264.688	183.824	353.461	115.866	334.265	100.305	181.889	130.618	205.497	191.422	245.955	169.364	279.255	88.1658	260.06
49	142.512	341.797	189.697	253.169	62.3213	260.517	108.038	155.429	77.2473	279.608	106.186	270.003	192.385	314.104	122.016	289.796	104.696	177.249	144.101	211.223	169.471	207.515	167.137	294.298	104.69	282.138
50	139.828	287.961	202.225	242.907	72.2662	292.307	102.905	152.71	82.5439	267.901	98.2628	267.906	170.965	337.821	122.708	320.568	101.883	185.026	142.915	198.454	149.976	234.019	174.72	281.456	112.937	280.479
Average	141.598	425.486	181.056	328.333	79.586	361.825	101.985	156.957	96.3804	344.375	100.096	270.902	166.469	330.055	122.479	294.369	126.039	234.394	137.353	194.724	165.114	280.621	152.159	237.616	125.284	252.677
SD	19.6233	52.6307	16.1701	37.3342	11.1651	50.0019	8.70177	14.6104	15.3493	58.4773	11.4172	38.9198	27.6196	43.3881	12.8764	26.8094	20.7216	38.0839	20.6918	34.7887	22.512	40.8602	16.5766	35.5892	15.0021	35.8286

## Sheet: 0.351 uM
0.351 uM Ca		Line witdh 7
	200213_081.nd2								200213_082.nd2								200213_083.nd2						200213_084.nd2
Background	109.547	129.564	109.547	129.564	109.547	129.564	109.547	129.564	109.515	126.399	109.515	126.399	109.515	126.399	109.515	126.399	111.286	128.704	111.286	128.704	111.286	128.704	107.676	128.146	107.676	128.146
	mCherry	GCaMP	mCherry	GCaMP	mCherry	GCaMP	mCherry	GCaMP	mCherry	GCaMP	mCherry	GCaMP	mCherry	GCaMP	mCherry	GCaMP	mCherry	GCaMP	mCherry	GCaMP	mCherry	GCaMP	mCherry	GCaMP	mCherry	GCaMP
1	266.758	379.271	252.63	480.166	267.858	394.047	252.119	432.637	187.149	230.615	184.184	286.322	199.808	269.085	187.348	223.528	205.997	282.54	200.403	300.225	210.881	372.041	218.834	255.84	205.905	193.071
2	252.433	361.243	267.298	469.19	289.288	370.894	245.594	421.454	183.014	230.594	193.329	286.392	186.981	267.417	189.621	226.731	221.073	253.407	206.429	290.492	217.121	350.252	222.682	251.723	220.326	193.391
3	245.798	378.567	286.063	445.089	273.356	380.577	234.594	387.395	191.796	228.322	197.213	262.342	183.448	243.817	188.269	223.421	210.626	246.788	197.373	315.628	216.422	330.134	227.202	261.962	225.293	204.065
4	251.682	397.166	312.592	403.626	284.715	392.436	242.201	360.036	188.945	223.553	203.482	264.164	175.574	249.719	192.28	209.31	216.645	249.089	194.695	301.576	205.479	307.648	235.023	273.776	227.127	200.357
5	250.427	424.722	310.719	385.13	279.713	411.639	235.529	346.194	190.478	220.772	206.205	264.716	178.253	248.233	186.226	222.668	217.919	244.843	196.425	301.292	198.029	311.047	256.548	276.34	226.324	198.146
6	252.407	412.348	288.224	383.563	274.954	418.118	234.72	359.594	201.774	226.159	198.489	257.136	181.392	258.89	197.357	210.328	235.415	254.146	200.96	291.831	212.131	327.67	247.826	268.888	206.571	194.145
7	256.188	402.746	267.456	398.747	257.642	426.303	225.58	330.482	191.697	233.66	209.877	243.403	178.928	277.931	210.319	224.43	219.635	256.979	195.119	275.122	196.905	322.221	238.567	265.743	207.31	189.85
8	262.456	409.87	269.503	375.961	272.207	413.726	239.197	357.812	194.467	212.078	216.977	223.495	196.489	251.283	199.338	227.407	218.279	251.118	198.315	277.311	200.554	345.882	231.323	263.328	212.348	187.467
9	250.162	383.606	273.612	410.061	282.104	429.008	232.115	383.727	201.055	228.873	208.876	248.206	198.637	245.062	192.499	235.71	229.71	263.18	210.284	307.665	201.335	355.69	224.236	254.493	233.196	189.387
10	243.15	371.618	284.671	433.917	286.926	451.281	226.67	404.511	202.546	246.462	198.114	249.353	196.969	267.926	194.486	237.894	212.341	263.04	206.904	319.357	192.601	342.677	225.283	254.117	222.509	191.548
11	254.768	392.362	290.518	441.47	279.273	458.612	224.861	438.663	205.494	267.663	211.632	232.332	195.36	272.258	193.471	246.853	219.283	259.466	210.645	302.362	186.57	354.055	216.702	252.287	235.895	181.091
12	242.882	416.376	302.252	450.653	294.638	432.546	237.923	406.494	198.37	272.262	210.77	222.755	193.788	282.009	197.316	256.652	220.285	258.541	205.005	324.117	179.513	363.622	212.173	252.628	220.761	188.846
13	263.186	449.649	312.981	461.465	265.183	451.64	244.941	430.278	193.401	257.178	201.489	224.769	196.496	292.435	194.519	268.686	209.397	253.966	221.034	327.32	193.286	328.949	218.924	267.366	223.577	186.075
14	267.269	473.413	319.516	423.321	255.494	412.293	242.058	433.138	179.12	241.647	188.166	237.9	204.273	308.762	190.855	267.338	210.683	267.169	218.692	306.205	190.516	308.958	219.58	272.555	218.011	203.084
15	255.688	525.055	309.403	414.757	248.532	392.606	249.976	429.633	190.317	230.664	199.533	242.671	216.687	312.883	205.572	251.429	219.619	302.909	220.917	314.023	185.231	284.434	228.921	265.147	225.227	180.38
16	255.057	526.845	310.057	408.929	253.562	363.24	250.353	405.029	209.807	265.107	210.189	238.135	220.69	296.845	183.824	248.276	220.786	320.479	208.661	324.59	198.248	254.586	234.204	266.004	232.942	191.594
17	255.538	492.786	295.051	424.025	244.654	379.655	238.261	393.603	218.136	258.664	213.406	267.653	206.4	295.203	185.639	252.56	222.158	273.584	213.142	343.043	196.599	248.774	251.133	274.301	220.988	205.355
18	276.691	433.498	292.471	464.933	252.713	387.496	246.136	353.47	213.069	253.835	215.965	242.096	214.806	275.93	165.211	242.008	223.82	255.838	209.073	328.579	206.994	274.827	256.852	252.229	232.241	212.617
19	271.921	420.017	299.599	478.123	246.405	356.473	241.336	349.628	207.021	225.95	209.023	233.357	228.496	282.147	172.285	242.649	224.256	251.199	214.684	307.369	202.484	304.949	244.182	247.861	238.776	196.918
20	276.419	429.62	302.265	449.758	229.623	364.801	241.269	337.667	202.121	202.607	213.957	233.707	229.839	281.51	173.756	230.871	225.011	254.863	213.139	315.557	197.536	334.196	241.531	249.194	246.789	196.772
21	279.205	455.534	300.562	443.697	234.266	354.201	234.183	335.512	192.603	211.386	224.028	257.898	223.945	272.054	182.248	230.472	227.998	255.915	197.607	305.481	193.327	343.708	240.269	256.898	231.829	200.661
22	277.423	495.745	291.577	438.574	241.854	364.214	244.658	357.354	204.015	220.659	238.694	263.51	219.515	261.083	186.439	219.009	230.193	275.937	212.854	280.999	204.337	360.498	233.587	271.45	234.298	199.907
23	272.671	468.279	279.088	433.599	238.963	367.082	244.931	386.182	205.98	227.932	231.191	272.338	202.35	284.084	190.042	214.667	236.237	269.783	196.734	287.091	201.715	324.433	243.834	273.881	232.979	202.883
24	277.88	488.66	274.116	458.617	255.694	389.173	239.46	400.118	196.298	242.329	220.786	251.175	209.911	262.613	182.121	214.452	229.815	266.971	209.969	285.538	210.843	316.475	254.726	277.437	246.151	206.673
25	289.071	437.789	276.256	472.887	260.268	418.732	220.226	383.701	201.59	249.773	228.699	215.911	220.945	251.792	176.237	220.123	225.948	254.577	204.525	278.321	212.133	300.49	248.042	268.442	235.848	199.37
26	292.367	447.796	272.419	473.446	255.629	397.101	214.707	359.494	214.378	221.306	213.867	217.175	225.736	247.991	177.321	214.093	226.345	241.932	219.395	299.125	218.719	288.967	232.491	240.351	266.91	222.511
27	283.209	410.369	261.588	452.82	246.605	387.435	208.03	319.408	196.031	228.934	218.585	215.419	231.626	248.405	171.095	219.785	244.497	250.479	212.749	289.698	203.51	269.321	245.222	258.473	285.905	215.772
28	284.698	424.545	269.438	442.037	256.753	330.944	204.404	330.871	202.067	239.213	222.543	226.959	216.067	260.606	162.116	233.56	236.823	233.461	222.257	298.767	213.441	262.91	232.985	259.114	260.475	221.001
29	272.458	459.463	273.249	457.968	279.946	324.971	219.999	331.683	180.194	231.013	223.517	217.968	211.034	278.196	166.211	219.969	258.379	230.033	242.734	293.935	221.085	252.213	228.122	264.322	250.465	232.47
30	276.773	466.673	279.131	455.842	274.191	333.071	220.734	324.904	187.986	215.953	217.934	213.245	230.925	292.785	174.85	208.286	239.9	254.179	221.257	269.84	225.492	277.939	228.651	242.941	241.812	233.234
31	267.445	485.008	283.958	437.76	292.792	325.732	229.881	344.791	180.838	232.636	202.088	210.021	213.787	311.407	172.673	217.893	226.484	271.488	215.663	281.285	218.922	285.195	242.843	254.031	250.279	212.022
32	271.983	465.703	270.858	429.123	284.17	348.184	219.37	370.854	169.163	237.579	205.106	204.371	227.644	276.725	175.246	216.012	202.724	283.002	210.15	291.5	190.015	307.252	250.942	258.801	244.765	226.238
33	255.556	494.735	274.163	404.024	275.163	369.659	215.433	388.193	173.025	244.697	200.718	221.846	226.115	291.522	180.123	239.08	204.297	296.376	232.594	293.971	206.427	304.706	231.504	270.205	235.026	232.272
34	257.48	468.393	268.782	397.588	274.528	405.209	206.224	406.232	187.942	242.84	199.535	221.269	221.74	286.464	183.909	246.986	211.506	280.081	221.302	304.069	209.833	272.295	241.434	275.737	254.207	218.965
35	256.947	440.413	261.713	405.299	262.701	382.899	207.478	404.484	179.59	243.656	221.42	202.876	223.087	269.915	191.997	245.196	203.913	278.055	207.637	302.941	209.191	264.091	235.762	291.589	244.715	204.622
36	243.569	409.272	271.197	439.944	251.313	404.556	198.39	384.056	176.989	215.823	211.767	198.086	230.173	239.022	197.388	239.528	222.265	282.912	207.589	304.4	202.808	265.183	234.097	265.345	241.147	222.355
37	253.031	394.546	282.825	448.659	273.372	387.769	219.361	376.718	178.761	216.124	200.025	200.127	212.788	252.45	214.072	260.464	230.071	294.686	216.13	310.714	199.765	258.43	235.75	271.512	228.282	224.197
38	243.572	426.082	275.797	465.614	267.155	394.867	203.602	358.96	168.282	209.103	211.312	232.615	222.471	243.427	224.361	239.817	231.736	301.044	196.413	301.738	192.937	260.75	234.845	257.166	233.657	227.542
39	244.474	415.607	283.286	453.235	233.365	396.401	189.303	336.06	177.9	214.591	203.538	219.499	230.366	243.73	203.885	246.8	235.055	289.564	210.316	296.114	192.422	268.239	229.189	242.432	232.864	222.287
40	224.791	425.428	298.78	455.505	228.017	384.415	192.193	320.578	182.867	205.347	208.896	217.472	209.588	263.023	209.211	246.942	227.313	322.684	207.515	293.564	189.189	233.335	230.961	238.916	232.765	239.2
41	245.074	435.487	290.846	418.201	225.988	380.896	199.995	323.55	174.205	215.083	212.685	226.897	214.511	286.695	215.612	238.507	224.751	311.707	215.091	311.031	188.259	233.647	229.087	239.931	247.958	237.133
42	267.146	421.669	273.767	396.038	234.482	362.97	200.275	302.893	157.538	194.555	200.505	258.689	200.517	298.345	207.589	217.301	245.948	313.508	207.996	291.182	192.815	244.068	219.68	227.886	238.376	227.001
43	236.394	420.634	261.854	400.307	247.45	334.481	179.487	319.712	170.942	188.433	206.457	249.847	190.803	295.416	220.783	215.325	241.619	298.309	213.392	281.539	207.907	249.127	228.96	230.039	238.783	216.59
44	243.43	434.563	283.26	399.441	242.756	296.229	178.898	327.142	178.898	193.26	192.962	253.537	223.484	308.31	209.964	222.54	218.733	300.191	216.383	280.595	206.554	264.646	214.706	231.389	261.018	237.093
45	231.423	445.395	284.352	413.82	232.989	283.827	196.243	350.793	184.188	214.958	184.498	247.566	212.942	306.672	219.465	215.225	207.716	289.15	219.184	290.065	210.082	268.937	215.014	254.355	268.155	237.866
46	206.195	454.23	287.962	441.202	242.548	291.309	204.131	368.225	168.718	238.826	185.707	252.076	218.123	302.687	213.06	238.347	203.665	284.509	204.409	269.89	198.365	256.813	227.18	260.925	276.144	251.648
47	214.121	447.426	297.704	443.863	251.086	273.47	203.013	349.32	168.732	256.642	186.399	235.066	207.851	287.341	205.904	243.46	206.913	299.029	201.02	253.032	196.625	258.197	224.806	268.081	282.585	250.542
48	246.985	425.272	299.424	446.033	240.145	307.289	205.458	320.268	169.914	257.665	185.059	224.328	234.493	296.07	208.261	236.33	222.558	294.5	198.023	249.46	193.229	227.023	232.749	269.069	276.843	254.107
49	247.963	414.624	312.609	465.104	232.005	347.886	200.779	336.41	173.393	240.707	178.943	225.576	212.433	310.39	211.721	230.664	210.696	294.727	187.795	261.914	182.312	236.913	230.357	246.644	306.925	251.55
50	249.482	459.06	311.813	471.737	236.856	342.596	205.488	350.442	180.529	228.504	189.986	194.008	217.307	287.567	213.172	240.875	214.511	285.704	193.857	287.726	175.419	251.951	235.024	229.898	295.522	259.78
Average	257.274	436.384	285.985	435.297	258.238	375.499	221.835	366.607	188.667	230.724	206.366	236.165	210.512	275.923	192.945	232.809	222.631	273.353	209.289	296.384	201.122	292.607	233.291	258.461	241.176	213.433
SD	18.0536	37.7169	16.5434	27.6421	19.282	43.1255	20.0144	36.2951	14.2118	19.3226	13.3447	22.4604	15.8694	21.5149	15.9784	15.3821	12.1944	23.156	10.4888	19.0119	11.2027	40.5313	11.1095	14.0444	22.4959	21.2045
1	157.211	249.707	143.083	350.602	158.311	264.483	142.572	303.073	77.6337	104.216	74.6686	159.923	90.2933	142.686	77.8331	97.129	94.7108	153.836	89.1169	171.521	99.5955	243.337	111.158	127.694	98.229	64.925
2	142.886	231.679	157.751	339.626	179.742	241.33	136.047	291.89	73.4987	104.195	83.8143	159.993	77.4664	141.018	80.1056	100.332	109.787	124.703	95.1433	161.788	105.835	221.548	115.006	123.577	112.65	65.245
3	136.251	249.003	176.516	315.525	163.809	251.013	125.047	257.831	82.2813	101.923	87.6981	135.943	73.9332	117.418	78.7544	97.0224	99.3399	118.084	86.0868	186.924	105.136	201.43	119.526	133.816	117.617	75.919
4	142.135	267.602	203.045	274.062	175.168	262.872	132.654	230.472	79.4295	97.1541	93.9665	137.765	66.059	123.32	82.7648	82.9114	105.359	120.385	83.4085	172.872	94.1933	178.944	127.347	145.63	119.451	72.211
5	140.88	295.158	201.172	255.566	170.166	282.075	125.982	216.63	80.9629	94.3734	96.69	138.317	68.7383	121.834	76.7115	96.2688	106.633	116.139	85.1395	172.588	86.743	182.343	148.872	148.194	118.648	70
6	142.86	282.784	178.677	253.999	165.407	288.554	125.173	230.03	92.2586	99.7601	88.9745	130.737	71.8768	132.491	87.8422	83.9293	124.129	125.442	89.674	163.127	100.845	198.966	140.15	140.742	98.895	65.999
7	146.641	273.182	157.909	269.183	148.095	296.739	116.033	200.918	82.1821	107.261	100.362	117.004	69.4133	151.532	100.804	98.0315	108.349	128.275	83.8328	146.418	85.6195	193.517	130.891	137.597	99.634	61.704
8	152.909	280.306	159.956	246.397	162.66	284.162	129.65	228.248	84.9524	85.6795	107.462	97.096	86.9745	124.884	89.8228	101.008	106.993	122.414	87.0286	148.607	89.2682	217.178	123.647	135.182	104.672	59.321
9	140.615	254.042	164.065	280.497	172.557	299.444	122.568	254.163	91.5396	102.474	99.3609	121.807	89.1224	118.663	82.9843	109.311	118.424	134.476	98.9977	178.961	90.049	226.986	116.56	126.347	125.52	61.241
10	133.603	242.054	175.124	304.353	177.379	321.717	117.123	274.947	93.0307	120.063	88.599	122.954	87.4542	141.527	84.9712	111.495	101.055	134.336	95.6182	190.653	81.3147	213.973	117.607	125.971	114.833	63.402
11	145.221	262.798	180.971	311.906	169.726	329.048	115.314	309.099	95.9786	141.264	102.117	105.933	85.8449	145.859	83.9562	120.454	107.997	130.762	99.3587	173.658	75.2839	225.351	109.026	124.142	128.219	52.945
12	133.335	286.812	192.705	321.089	185.091	302.982	128.376	276.93	88.855	145.863	101.255	96.356	84.2731	155.61	87.8012	130.253	108.999	129.837	93.7193	195.413	68.2273	234.918	104.497	124.482	113.085	60.7
13	153.639	320.085	203.434	331.901	155.636	322.076	135.394	300.714	83.886	130.779	91.9738	98.37	86.9812	166.036	85.0042	142.287	98.1114	125.262	109.748	198.616	81.9997	200.245	111.248	139.22	115.901	57.929
14	157.722	343.849	209.969	293.757	145.947	282.729	132.511	303.574	69.605	115.248	78.651	111.501	94.7581	182.363	81.3402	140.939	99.3972	138.465	107.406	177.501	79.2295	180.254	111.904	144.409	110.335	74.938
15	146.141	395.491	199.856	285.193	138.985	263.042	140.429	300.069	80.8023	104.265	90.0183	116.272	107.172	186.484	96.0572	125.03	108.333	174.205	109.631	185.319	73.9454	155.73	121.245	137.001	117.551	52.234
16	145.51	397.281	200.51	279.365	144.015	233.676	140.806	275.465	100.292	138.708	100.674	111.736	111.175	170.446	74.3089	121.877	109.5	191.775	97.3755	195.886	86.9615	125.882	126.528	137.858	125.266	63.448
17	145.991	363.222	185.504	294.461	135.107	250.091	128.714	264.039	108.621	132.265	103.891	141.254	96.8855	168.804	76.1242	126.161	110.872	144.88	101.856	214.339	85.3132	120.07	143.457	146.155	113.312	77.209
18	167.144	303.934	182.924	335.369	143.166	257.932	136.589	223.906	103.554	127.436	106.45	115.697	105.291	149.531	55.6964	115.609	112.534	127.134	97.7868	199.875	95.7082	146.123	149.176	124.083	124.565	84.471
19	162.374	290.453	190.052	348.559	136.858	226.909	131.789	220.064	97.5057	99.5505	99.5082	106.958	118.981	155.748	62.7702	116.25	112.97	122.495	103.398	178.665	91.1981	176.245	136.506	119.715	131.1	68.772
20	166.872	300.056	192.718	320.194	120.076	235.237	131.722	208.103	92.606	76.2077	104.442	107.308	120.324	155.111	64.2405	104.472	113.725	126.159	101.853	186.853	86.2498	205.492	133.855	121.048	139.113	68.626
21	169.658	325.97	191.016	314.133	124.719	224.637	124.636	205.948	83.0878	84.9868	114.513	131.499	114.43	145.655	72.733	104.073	116.712	127.211	86.3206	176.777	82.0405	215.004	132.593	128.752	124.153	72.515
22	167.876	366.181	182.03	309.01	132.307	234.65	135.111	227.79	94.5004	94.2596	129.179	137.111	110	134.684	76.9242	92.6104	118.907	147.233	101.568	152.295	93.0511	231.794	125.911	143.304	126.622	71.761
23	163.124	338.715	169.541	304.035	129.416	237.518	135.384	256.618	96.4651	101.533	121.676	145.939	92.8351	157.685	80.5271	88.2679	124.951	141.079	85.4485	158.387	90.4294	195.729	136.158	145.735	125.303	74.737
24	168.333	359.096	164.569	329.053	146.147	259.609	129.913	270.554	86.7833	115.93	111.271	124.776	100.396	136.214	72.6056	88.0533	118.529	138.267	98.6826	156.834	99.5567	187.771	147.05	149.291	138.475	78.527
25	179.524	308.225	166.709	343.323	150.721	289.168	110.679	254.137	92.0755	123.374	119.184	89.512	111.43	125.393	66.7221	93.724	114.662	125.873	93.2395	149.617	100.847	171.786	140.366	140.296	128.172	71.224
26	182.82	318.232	162.872	343.882	146.082	267.537	105.16	229.93	104.863	94.9067	104.352	90.776	116.221	121.592	67.8061	87.694	115.059	113.228	108.109	170.421	107.433	160.263	124.815	112.205	159.234	94.365
27	173.662	280.805	152.041	323.256	137.058	257.871	98.4835	189.844	86.5159	102.535	109.07	89.02	122.111	122.006	61.5802	93.3858	133.211	121.775	101.463	160.994	92.2242	140.617	137.546	130.327	178.229	87.626
28	175.151	294.981	159.891	312.473	147.206	201.38	94.8573	201.307	92.5523	112.814	113.028	100.56	106.552	134.207	52.6014	107.161	125.537	104.757	110.971	170.063	102.155	134.206	125.309	130.968	152.799	92.855
29	162.911	329.899	163.702	328.404	170.399	195.407	110.452	202.119	70.679	104.614	114.002	91.569	101.519	151.797	56.6957	93.5696	147.093	101.329	131.448	165.231	109.799	123.509	120.446	136.177	142.789	104.324
30	167.226	337.109	169.584	326.278	164.644	203.507	111.187	195.34	78.4714	89.5542	108.419	86.846	121.41	166.386	65.3347	81.8874	128.614	125.475	109.971	141.136	114.206	149.235	120.975	114.796	134.136	105.088
31	157.898	355.444	174.411	308.196	183.245	196.168	120.334	215.227	71.3233	106.237	92.5734	83.622	104.272	185.008	63.1578	91.4936	115.198	142.784	104.377	152.581	107.636	156.491	135.167	125.886	142.603	83.876
32	162.436	336.139	161.311	299.559	174.623	218.62	109.823	241.29	59.6476	111.18	95.5912	77.972	118.129	150.326	65.731	89.613	91.4379	154.298	98.8636	162.796	78.7287	178.548	143.266	130.655	137.089	98.092
33	146.009	365.171	164.616	274.46	165.616	240.095	105.886	258.629	63.5102	118.298	91.2025	95.447	116.6	165.123	70.6081	112.681	93.0114	167.672	121.308	165.267	95.1408	176.002	123.828	142.059	127.35	104.126
34	147.933	338.829	159.235	268.024	164.981	275.645	96.677	276.668	78.4273	116.441	90.0196	94.87	112.225	160.065	74.3942	120.587	100.22	151.377	110.016	175.365	98.5474	143.591	133.758	147.591	146.531	90.819
35	147.4	310.849	152.166	275.735	153.154	253.335	97.9314	274.92	70.0753	117.257	111.905	76.477	113.572	143.516	82.4823	118.797	92.6271	149.351	96.3505	174.237	97.9047	135.387	128.086	163.443	137.039	76.476
36	134.022	279.708	161.65	310.38	141.766	274.992	88.8429	254.492	67.474	89.424	102.252	71.687	120.658	112.623	87.8727	113.129	110.979	154.208	96.3031	175.696	91.5222	136.479	126.421	137.199	133.471	94.209
37	143.484	264.982	173.278	319.095	163.825	258.205	109.814	247.154	69.2461	89.7246	90.5096	73.728	103.273	126.051	104.557	134.065	118.785	165.982	104.844	182.01	88.4786	129.726	128.074	143.366	120.606	96.051
38	134.025	296.518	166.25	336.05	157.608	265.303	94.0551	229.396	58.7674	82.7043	101.797	106.216	112.956	117.028	114.846	113.418	120.45	172.34	85.1269	173.034	81.6512	132.046	127.169	129.02	125.981	99.396
39	134.927	286.043	173.739	323.671	123.818	266.837	79.7564	206.496	68.3848	88.1921	94.0229	93.1	120.851	117.331	94.3697	120.401	123.769	160.86	99.0305	167.41	81.1356	139.535	121.513	114.286	125.188	94.141
40	115.244	295.864	189.233	325.941	118.47	254.851	82.6464	191.014	73.3517	78.9483	99.381	91.073	100.073	136.624	99.6963	120.543	116.027	193.98	96.2293	164.86	77.9032	104.631	123.285	110.77	125.089	111.054
41	135.527	305.923	181.299	288.637	116.441	251.332	90.4476	193.986	64.6901	88.6845	103.17	100.498	104.996	160.296	106.097	112.108	113.465	183.003	103.805	182.327	76.9727	104.943	121.411	111.785	140.282	108.987
42	157.599	292.105	164.22	266.474	124.935	233.406	90.7285	173.329	48.0226	68.156	90.9897	132.29	91.0018	171.946	98.0735	90.9016	134.662	184.804	96.71	162.478	81.5295	115.364	112.004	99.7403	130.7	98.855
43	126.847	291.07	152.307	270.743	137.903	204.917	69.9404	190.148	61.4274	62.0343	96.9423	123.448	81.288	169.017	111.268	88.9263	130.333	169.605	102.106	152.835	96.6212	120.423	121.284	101.893	131.107	88.444
44	133.883	304.999	173.713	269.877	133.209	166.665	69.3512	197.578	69.3833	66.8613	83.4466	127.138	113.969	181.911	100.449	96.1413	107.447	171.487	105.097	151.891	95.2685	135.942	107.029	103.243	153.342	108.947
45	121.876	315.831	174.805	284.256	123.442	154.263	86.6962	221.229	74.6727	88.5587	74.9828	121.167	103.427	180.273	109.95	88.8257	96.4297	160.446	107.898	161.361	98.7956	140.233	107.338	126.209	160.479	109.72
46	96.6475	324.666	178.415	311.638	133.001	161.745	94.5845	238.661	59.2031	112.427	76.1915	125.677	108.608	176.288	103.545	111.948	92.3793	155.805	93.1226	141.186	87.0789	128.109	119.504	132.779	168.468	123.502
47	104.574	317.862	188.157	314.299	141.539	143.906	93.4658	219.756	59.2172	130.243	76.8839	108.667	98.3363	160.942	96.3888	117.061	95.6266	170.325	89.7344	124.328	85.3393	129.493	117.13	139.935	174.909	122.396
48	137.438	295.708	189.877	316.469	130.598	177.725	95.9113	190.704	60.3994	131.266	75.5437	97.929	124.978	169.671	98.7457	109.931	111.272	165.796	86.7371	120.756	81.9429	98.319	125.073	140.923	169.167	125.961
49	138.416	285.06	203.062	335.54	122.458	218.322	91.2323	206.846	63.8777	114.308	69.4283	99.177	102.918	183.991	102.206	104.265	99.4103	166.023	76.5087	133.21	71.0259	108.209	122.681	118.498	199.249	123.404
50	139.935	329.496	202.266	342.173	127.309	213.032	95.9413	220.878	71.0138	102.105	80.4707	67.609	107.792	161.168	103.657	114.476	103.225	157	82.5708	159.022	64.1329	123.247	127.348	101.752	187.846	131.634
Average	147.727	306.82	176.438	305.733	148.691	245.935	112.288	237.043	79.1517	104.325	96.8514	109.766	100.997	149.524	83.4304	106.41	111.345	144.649	98.0028	167.68	89.8363	163.903	125.615	130.315	133.5	85.287
SD	18.0536	37.7169	16.5434	27.6421	19.282	43.1255	20.0144	36.2951	14.2118	19.3226	13.3447	22.4604	15.8694	21.5149	15.9784	15.3821	12.1944	23.156	10.4888	19.0119	11.2027	40.5313	11.1095	14.0444	22.4959	21.2045

## Sheet: 0.225 uM
0.225 uM Ca		Line witdh 7
	200213_086.nd2				200213_087.nd2						200213_088.nd2												200213_089.nd2
Background	110.809	135.995	110.809	135.995	109.995	134.839	109.995	134.839	109.995	134.839	109.084	134.053	109.084	134.053	109.084	134.053	109.084	134.053	109.084	134.053	109.084	134.053	109.115	135.914	109.115	135.914
	mCherry	GCaMP	mCherry	GCaMP	mCherry	GCaMP	mCherry	GCaMP	mCherry	GCaMP	mCherry	GCaMP	mCherry	GCaMP	mCherry	GCaMP	mCherry	GCaMP	mCherry	GCaMP	mCherry	GCaMP	mCherry	GCaMP	mCherry	GCaMP
1	261.273	224.484	204.599	269.655	211.1	225.016	221.326	220.166	227.513	271.067	243.992	308.394	214.928	251.078	213.913	211.703	204.379	271.05	211.143	289.128	212.175	325.747	263.372	282.869	260.607	276.723
2	268.548	227.325	214.835	265.546	228.204	224.646	225.011	220.748	230.739	255.888	257.738	281.702	225.007	238.463	212.802	231.338	209.55	279.747	216.201	326.879	244.089	363.622	270.136	264.358	281.402	303.448
3	256.487	226.234	221.29	281.288	214.926	212.742	229.279	240.404	247.899	245.753	256.292	282.603	233.892	247.448	220.161	252.952	216.05	304.164	231.585	330.952	239.412	394.556	261.053	278.313	276.072	269.851
4	267.599	232.548	223.208	253.205	227.142	224.638	227.849	232.101	249.389	251.246	272.084	260.597	241.062	275.068	223.272	218.343	230.113	306.507	233.544	334.503	220.973	370.137	251.191	308.568	289.086	261.259
5	261.94	247.115	230.381	241.92	240.464	224.805	223.032	233.055	241.933	224.021	264.567	275.033	228.372	308.87	226.05	221.244	234.249	309.384	238.81	288.978	222.692	366.432	268.283	302.273	282.461	255.69
6	260.085	240.231	216.833	238.454	256.273	216.108	221.303	222.059	244.957	211.913	266.176	258.618	234.726	333.122	219.397	240.015	231.518	318.129	224.373	289.314	207.14	332.912	277.939	267.152	264.655	257.027
7	256.058	256.901	222.376	245.517	255.904	202.81	226.768	208.812	251.964	229.423	271.162	243.239	233.242	330.754	212.478	236.496	216.824	283.755	232.71	300.156	192.73	323.451	279.118	260.704	272.079	267.374
8	265.171	270.032	232.942	275.206	263.892	189.425	230.785	200.414	263.688	234.879	282.454	242.547	247.978	322.441	207.208	248.89	217.541	280.316	235.07	278.326	191.696	324.308	312.457	256.214	272.844	277.786
9	272.721	281.329	228.711	302.802	262.122	199.482	237.637	210.292	265.688	260.949	278.343	273.385	252.379	289.129	201.072	231.465	215.457	297.5	236.065	293.902	203.929	336.091	291.55	265.574	278.674	290.009
10	280.462	304.323	245.263	312.693	254.105	213.368	238.946	237.555	258.95	256.092	286.955	271.806	233.173	254.241	211.685	234.925	211.988	273.488	232.297	324.486	202.076	357.457	265.294	261.565	288.577	283.214
11	293.126	283.242	245.37	289.338	258.397	228.565	226.437	229.827	247.907	294.274	296.116	270.619	250.518	257.998	229.485	246.002	215.794	246.442	214.688	347.548	203.119	349.59	265.399	292.532	299.261	290.198
12	270.406	278.996	237.276	283.791	263.138	223.281	249.649	234.961	229.163	303.048	289.145	257.457	239.828	284.35	243.421	263.597	212.747	271.954	219.164	341.836	197.653	352.91	270.951	274.636	312.459	297.743
13	272.101	249.969	240.342	289.494	260.813	213.224	241.108	255.538	233.997	293.141	286.261	244.674	224.509	294.56	249.15	266.272	243.281	287.254	224.578	336.473	210.564	335.47	289.751	263.352	300.404	299.992
14	264.052	260.694	242.698	326.797	253.075	216.906	226.912	262.092	238.747	282.651	279.087	250.023	213.64	295.506	238.942	240.78	237.727	354.236	228.225	300.353	197.657	287.619	279.441	262.312	286.862	280.874
15	288.295	248.774	247.177	337.357	261.32	221.843	239.821	236.579	237.992	273.564	300.982	265.415	239.029	296.435	218.937	241.01	239.618	334.308	221.028	294.784	196.548	273.805	273.718	273.888	292.695	266.862
16	259.258	266.615	237.886	310.145	253.531	223.278	252.22	228.236	231.206	282.653	309.983	283.684	235.366	284.759	224.679	261.993	248.232	316.279	215.391	284.064	214.921	276.615	281.849	270.338	314.512	242.438
17	245.369	266.094	237.131	329.394	263.837	217.172	234.716	229.632	225.007	286.741	297.732	279.697	228.827	289.487	239.729	254.559	257.698	300.641	218.407	294.648	218.687	267.327	279.312	267.396	311.599	226.543
18	250.092	277.332	247.891	342.326	277.381	210.708	233.506	221.717	242.474	288.151	341.662	241.253	211.24	281.848	218.115	254.431	256.846	301.599	222.446	297.204	214.347	282.911	283.731	257.69	302.43	219.762
19	259.954	271.592	253.048	363.998	261.271	215.859	231.453	212.062	237.78	313.051	313.347	265.66	228.613	287.674	219.493	232.949	247.192	283.802	211.802	304.315	194.923	272.97	259.632	260.117	287.317	241.712
20	266.767	291.227	238.252	353.359	252.842	217.747	247.558	214.948	232.532	326.432	307.4	294.33	216.268	291.925	215.129	225.507	248.913	279.369	201.358	312.986	196.656	318.93	267.266	268.423	277.616	249.732
21	262.189	258.699	234.984	359.213	251.946	207.311	234.273	226.038	237.631	321.246	304.48	295.467	240.25	306.346	210.874	226.565	266.478	259.806	220.285	315.717	191.516	311.051	257.331	283.106	263.459	266.314
22	274.708	253.932	231.864	347.775	235.981	182.103	245.019	217.734	252.98	319.169	307.731	291.721	221.578	334.696	231.005	229.774	264.418	271.071	219.654	305.716	180.646	300.961	260.437	289.429	267.115	261.572
23	258.534	237.992	228.106	332.788	237.035	193.502	236.767	249.245	225.795	299.865	277.711	295.229	223.792	302.263	215.073	246.423	267.074	287.57	213.589	296.023	169.566	283.738	245.813	286.393	279.872	268.456
24	256.019	244.315	225.98	332.796	224.195	208.536	230.335	272.17	234.776	287.492	274.989	287.364	209.627	294.263	219.933	260.467	243.972	290.529	215.202	285.483	176.74	283.467	264.666	275.194	297.223	266.509
25	253.3	229.258	228.306	366.689	233.625	196.13	237.387	267.388	241.815	302.837	243.737	306.174	214.743	309.775	241.119	259.707	246.414	324.382	221.504	292.53	172.248	285.079	262.274	276.223	297.242	278.981
26	263.484	242.995	225.474	353.711	250.714	205.526	233.318	287.404	244.536	293.209	251.696	306.973	223.669	303.386	248.85	258.864	261.286	365.341	208.555	303.313	184.873	294.67	257.492	281.787	293.881	311.15
27	254.503	243.807	237.36	373.531	232.591	205.218	232.238	277.42	248.011	284.832	261.889	300.662	242.719	306.902	234.792	252.368	252.202	364.358	207.422	290.113	184.261	278.364	245.588	288.665	288.764	305.693
28	266.524	235.34	239.557	344.252	234.306	200.947	252.19	295.779	245.912	289.557	254.31	281.075	220.459	291.385	227.306	253.572	242.231	323.616	206.537	262.163	191.029	323.354	237.854	279.658	296.503	298.926
29	294.849	238.111	238.637	348.069	235.588	196.464	243.856	289.345	247.021	240.504	271.719	259.689	239.415	277.488	214.407	268.303	220.796	279.97	200.546	243.296	196.93	317.586	225.133	277.805	291.754	282.763
30	282.653	247.346	234.894	348.381	230.598	202.895	245.09	260.687	231.791	236.011	285.246	268.199	233.158	291.3	215.466	261.918	241.249	271.631	213.689	260.092	203.627	299.158	228.284	285.772	285.14	290.428
31	283.663	243.264	233.66	341.344	236.608	228.556	243.623	262.893	222.631	227.426	263.45	273.951	238.17	288.712	210.28	265.83	232.697	270.574	201.142	261.969	195.076	292.548	230.981	290.235	282.303	299.706
32	259.291	270.775	248.747	338.101	233.708	219.438	239.741	280.195	228.428	245.965	264.655	284.755	241.409	299.321	208.776	239.415	243.766	272.824	194.757	269.322	189.849	284.805	221.572	272.996	278.538	296.459
33	266.561	284.736	262.179	356.272	232.641	213.71	237.079	279.525	219.126	265.427	262.857	324.104	230.687	301.839	205.657	224.496	249.661	310.988	187.791	257.704	177.191	269.08	233.187	268.212	280.678	306.202
34	283.713	295.786	253.04	368.216	236.261	213.432	267.989	273.467	217.235	271.396	273.616	323.99	220.811	303.554	223.124	230.022	252.366	306.611	185.691	273.946	183.142	261.714	243.333	259.663	270.549	264.835
35	261.574	295.453	252.209	380.187	227.612	202.711	237.848	272.684	214.216	269.697	257.155	307.835	225.659	323.128	224.158	226.874	254.823	303.296	175.424	264.562	185.516	259.6	268.063	268.811	258.081	277.127
36	270.235	248.992	237.803	340.817	220.685	200.775	247.507	257.302	231.252	278.578	261.465	271.367	235.534	326.792	222.217	222.523	256.273	286.842	182.78	277.296	199.603	276.043	283.957	264.374	284.845	271.174
37	288.65	252.544	251.42	325.588	224.005	183.008	242.528	245.15	231.814	276.883	255.421	248.406	246.58	281.08	199.804	242.751	246.849	256.486	177.751	264.858	187.94	299.665	272.701	290.855	283.198	297.022
38	247.657	253.045	249.788	332.834	243.932	186.957	236.528	234.528	231.412	269.818	250.24	258.119	234.82	257.734	208.02	228.316	227.784	252.982	173.824	293.587	191.77	354.605	281.288	326.78	280.084	318.001
39	247.809	276.082	236.44	349.984	240.649	189.474	238.94	239.431	237.594	274.775	279.848	276.505	237.444	272.428	208.563	249.975	221.292	289.013	174.137	328.34	182.656	336.342	272.264	328.704	279.121	319.056
40	255.687	247.97	279.825	343.956	227.274	181.703	232.788	242.699	241.431	288.835	237.28	283.735	225.815	269.478	202.698	257.013	250.457	307.024	188.261	321.516	179.686	318.416	293.578	326.493	270.355	306.964
41	249.574	227.58	246.76	324.077	217.719	179.273	229.213	224.31	228.888	316.161	241.301	272.353	234.765	311.336	202.996	260.462	275.223	297.38	172.052	325.151	193.974	294.49	291.47	312.347	263.661	275.969
42	255.057	222.409	230.268	312.395	241.371	187.388	225.131	221.98	218.07	311.9	248.756	262.769	215.837	303.719	198.381	264.434	270.984	265.606	178.439	284.851	186.311	317.7	261.894	264.671	266.549	270.492
43	267.521	219.359	243.27	314.929	242.983	196.264	244.832	209.353	225.94	299.029	246.88	252.864	204.427	319.559	194.135	268.317	266.806	251.554	199.141	313.296	197.817	305.294	280.418	242.359	262.289	286.516
44	256.712	218.804	249.662	350.552	233.186	219.024	237.268	214.565	230.64	286.481	265.077	233.467	200.1	300.904	181.115	272.634	274.836	280.96	218.57	338.312	203.676	302.467	286.91	257.309	265.476	318.143
45	296.805	213.266	257.525	353.529	257.213	209.585	250.429	195.127	231.713	266.016	288.863	225.959	202.937	295.809	199.041	254.853	268.252	300.694	211.348	366.947	200.327	293.641	308.801	260.228	281.772	327.504
46	290.243	213.735	243.274	332.616	257.243	203.468	263.672	193.433	235.257	275.399	290.456	240.844	196.581	277.258	207.44	267.293	247.652	304.59	215.49	336.207	191.477	277.875	287.705	309.109	273.238	306.78
47	288.752	252.741	242.377	304.882	237.05	199.683	253.513	188.455	238.17	252.69	274.3	260.938	197.69	271.312	197.164	256.558	235.403	293.769	223.067	302.469	194.416	279.492	287.192	286.063	250.657	289.474
48	274.034	254.487	243.681	309.735	222.778	185.769	260.315	192.682	238.531	256.299	252.4	256.679	221.594	271.35	206.742	298.099	236.224	290.647	219.19	286.888	213.938	292.113	296.967	255.072	269.55	292.444
49	270.702	257.263	240.901	327.366	219.151	193.259	254.211	198.268	226.387	254.848	263.984	265.626	238.174	265.445	203.432	283.342	234.048	300.675	219.255	278.615	213.601	317.603	289.88	247.891	268.125	268.825
50	270.72	260.758	229.23	323	237.835	193.841	240.216	205.473	222.095	245.654	279.877	268.168	222.363	258.693	228.667	291.853	234.22	308.789	214.495	269.178	218.708	327.868	298.142	251.913	276.637	273.917
Average	267.43	252.918	238.495	322.997	241.524	206.151	238.783	236.519	236.412	273.859	273.857	272.714	227.468	290.648	216.727	248.75	241.629	293.79	210.17	298.806	198.402	309.033	269.332	276.928	281.165	281.113
SD	13.3796	22.739	12.9059	35.7955	15.5624	13.931	10.7861	28.386	11.5223	27.4753	21.8772	22.6231	13.7207	22.9995	14.56	19.0948	18.6379	26.2901	18.3364	27.1317	15.6694	32.0561	21.2767	20.1919	14.4485	23.5598
Background subtraction
1	150.464	88.489	93.7899	133.66	101.105	90.1773	111.331	85.327	117.518	136.228	134.908	174.341	105.844	117.025	104.829	77.6497	95.2953	136.997	102.059	155.075	103.091	191.694	154.257	146.955	151.492	140.809
2	157.739	91.33	104.026	129.551	118.209	89.8068	115.016	85.909	120.744	121.049	148.654	147.649	115.923	104.41	103.718	97.2854	100.466	145.694	107.117	192.826	135.005	229.569	161.021	128.444	172.287	167.534
3	145.678	90.239	110.481	145.293	104.931	77.9025	119.284	105.565	137.904	110.914	147.208	148.55	124.808	113.395	111.077	118.899	106.966	170.111	122.501	196.899	130.328	260.503	151.938	142.399	166.957	133.937
4	156.79	96.553	112.399	117.21	117.147	89.7995	117.853	97.262	139.394	116.407	163	126.544	131.978	141.015	114.188	84.2898	121.029	172.454	124.46	200.45	111.889	236.084	142.076	172.654	179.971	125.345
5	151.131	111.12	119.572	105.925	130.469	89.9665	113.037	98.216	131.938	89.182	155.483	140.98	119.288	174.817	116.966	87.1914	125.165	175.331	129.726	154.925	113.608	232.379	159.168	166.359	173.346	119.776
6	149.276	104.236	106.024	102.459	146.278	81.2695	111.308	87.22	134.962	77.074	157.092	124.565	125.642	199.069	110.313	105.962	122.434	184.076	115.289	155.261	98.0562	198.859	168.824	131.238	155.54	121.113
7	145.249	120.906	111.567	109.522	145.909	67.9706	116.773	73.973	141.969	94.584	162.078	109.186	124.158	196.701	103.394	102.443	107.74	149.702	123.626	166.103	83.6462	189.398	170.003	124.79	162.964	131.46
8	154.362	134.037	122.133	139.211	153.897	54.5865	120.79	65.575	153.693	100.04	173.37	108.494	138.894	188.388	98.1238	114.837	108.457	146.263	125.986	144.273	82.6125	190.255	203.342	120.3	163.729	141.872
9	161.912	145.334	117.902	166.807	152.127	64.6429	127.642	75.453	155.693	126.11	169.259	139.332	143.295	155.076	91.9877	97.4121	106.373	163.447	126.981	159.849	94.8446	202.038	182.435	129.66	169.559	154.095
10	169.653	168.328	134.454	176.698	144.11	78.5291	128.951	102.716	148.955	121.253	177.871	137.753	124.089	120.188	102.601	100.872	102.904	139.435	123.213	190.433	92.9923	223.404	156.179	125.651	179.462	147.3
11	182.317	147.247	134.561	153.343	148.402	93.7258	116.442	94.988	137.912	159.435	187.032	136.566	141.434	123.945	120.401	111.949	106.71	112.389	105.604	213.495	94.0354	215.537	156.284	156.618	190.146	154.284
12	159.597	143.001	126.467	147.796	153.143	88.4422	139.654	100.122	119.168	168.209	180.061	123.404	130.744	150.297	134.337	129.544	103.663	137.901	110.08	207.783	88.5688	218.857	161.836	138.722	203.344	161.829
13	161.292	113.974	129.533	153.499	150.818	78.3849	131.113	120.699	124.002	158.302	177.177	110.621	115.425	160.507	140.066	132.219	134.197	153.201	115.494	202.42	101.48	201.417	180.636	127.438	191.289	164.078
14	153.243	124.699	131.889	190.802	143.08	82.0674	116.917	127.253	128.752	147.812	170.003	115.97	104.556	161.453	129.858	106.727	128.643	220.183	119.141	166.3	88.5728	153.566	170.326	126.398	177.747	144.96
15	177.486	112.779	136.368	201.362	151.325	87.0041	129.826	101.74	127.997	138.725	191.898	131.362	129.945	162.382	109.853	106.957	130.534	200.255	111.944	160.731	87.4635	139.752	164.603	137.974	183.58	130.948
16	148.449	130.62	127.077	174.15	143.536	88.4386	142.225	93.397	121.211	147.814	200.899	149.631	126.282	150.706	115.595	127.94	139.148	182.226	106.307	150.011	105.837	142.562	172.734	134.424	205.397	106.524
17	134.56	130.099	126.322	193.399	153.842	82.3326	124.721	94.793	115.012	151.902	188.648	145.644	119.743	155.434	130.645	120.506	148.614	166.588	109.323	160.595	109.603	133.274	170.197	131.482	202.484	90.629
18	139.283	141.337	137.082	206.331	167.386	75.8687	123.511	86.878	132.478	153.312	232.578	107.2	102.156	147.795	109.031	120.378	147.762	167.546	113.362	163.151	105.263	148.858	174.616	121.776	193.315	83.848
19	149.145	135.597	142.239	228.003	151.276	81.0198	121.458	77.223	127.785	178.212	204.263	131.607	119.529	153.621	110.409	98.896	138.108	149.749	102.718	170.262	85.8388	138.917	150.517	124.203	178.202	105.798
20	155.958	155.232	127.443	217.364	142.847	82.9084	137.563	80.109	122.537	191.593	198.316	160.277	107.184	157.872	106.045	91.4538	139.829	145.316	92.274	178.933	87.5718	184.877	158.151	132.509	168.501	113.818
21	151.38	122.704	124.175	223.218	141.951	72.4716	124.278	91.199	127.636	186.407	195.396	161.414	131.166	172.293	101.79	92.512	157.394	125.753	111.201	181.664	82.4315	176.998	148.216	147.192	154.344	130.4
22	163.899	117.937	121.055	211.78	125.986	47.2636	135.024	82.895	142.985	184.33	198.647	157.668	112.494	200.643	121.921	95.7214	155.334	137.018	110.57	171.663	71.5616	166.908	151.322	153.515	158	125.658
23	147.725	101.997	117.297	196.793	127.04	58.6627	126.772	114.406	115.8	165.026	168.627	161.176	114.708	168.21	105.989	112.37	157.99	153.517	104.505	161.97	60.4818	149.685	136.698	150.479	170.757	132.542
24	145.21	108.32	115.171	196.801	114.2	73.6973	120.34	137.331	124.781	152.653	165.905	153.311	100.543	160.21	110.849	126.414	134.888	156.476	106.118	151.43	67.6561	149.414	155.551	139.28	188.108	130.595
25	142.491	93.263	117.497	230.694	123.63	61.2908	127.392	132.549	131.82	167.998	134.653	172.121	105.659	175.722	132.035	125.654	137.33	190.329	112.42	158.477	63.1636	151.026	153.159	140.309	188.127	143.067
26	152.675	107	114.665	217.716	140.719	70.6871	123.323	152.565	134.541	158.37	142.612	172.92	114.585	169.333	139.766	124.811	152.202	231.288	99.4707	169.26	75.7887	160.617	148.377	145.873	184.766	175.236
27	143.694	107.812	126.551	237.536	122.596	70.3786	122.243	142.581	138.016	149.993	152.805	166.609	133.635	172.849	125.708	118.315	143.118	230.305	98.3384	156.06	75.1773	144.311	136.473	152.751	179.649	169.779
28	155.715	99.345	128.748	208.257	124.311	66.1082	142.195	160.94	135.917	154.718	145.226	147.022	111.375	157.332	118.222	119.519	133.147	189.563	97.4534	128.11	81.9445	189.301	128.739	143.744	187.388	163.012
29	184.04	102.116	127.828	212.074	125.593	61.6247	133.861	154.506	137.026	105.665	162.635	125.636	130.331	143.435	105.323	134.25	111.712	145.917	91.4619	109.243	87.8462	183.533	116.018	141.891	182.639	146.849
30	171.844	111.351	124.085	212.386	120.603	68.0565	135.095	125.848	121.796	101.172	176.162	134.146	124.074	157.247	106.382	127.865	132.165	137.578	104.605	126.039	94.5432	165.105	119.169	149.858	176.025	154.514
31	172.854	107.269	122.851	205.349	126.613	93.7167	133.628	128.054	112.636	92.587	154.366	139.898	129.086	154.659	101.196	131.777	123.613	136.521	92.0583	127.916	85.9916	158.495	121.866	154.321	173.188	163.792
32	148.482	134.78	137.938	202.106	123.713	84.5992	129.746	145.356	118.433	111.126	155.571	150.702	132.325	165.268	99.6919	105.362	134.682	138.771	85.6727	135.269	80.765	150.752	112.457	137.082	169.423	160.545
33	155.752	148.741	151.37	220.277	122.646	78.8712	127.084	144.686	109.131	130.588	153.773	190.051	121.603	167.786	96.5732	90.4431	140.577	176.935	78.7068	123.651	68.1067	135.027	124.072	132.298	171.563	170.288
34	172.904	159.791	142.231	232.221	126.266	78.5926	157.994	138.628	107.24	136.557	164.532	189.937	111.727	169.501	114.04	95.969	143.282	172.558	76.6067	139.893	74.0578	127.661	134.218	123.749	161.434	128.921
35	150.765	159.458	141.4	244.192	117.617	67.8721	127.853	137.845	104.221	134.858	148.071	173.782	116.575	189.075	115.074	92.8209	145.739	169.243	66.34	130.509	76.4321	125.547	158.948	132.897	148.966	141.213
36	159.426	112.997	126.994	204.822	110.69	65.9356	137.512	122.463	121.257	143.739	152.381	137.314	126.45	192.739	113.133	88.47	147.189	152.789	73.6965	143.243	90.5193	141.99	174.842	128.46	175.73	135.26
37	177.841	116.549	140.611	189.593	114.01	48.1692	132.533	110.311	121.819	142.044	146.337	114.353	137.496	147.027	90.7203	108.698	137.765	122.433	68.6675	130.805	78.8559	165.612	163.586	154.941	174.083	161.108
38	136.848	117.05	138.979	196.839	133.937	52.1179	126.533	99.689	121.417	134.979	141.156	124.066	125.736	123.681	98.9358	94.2633	118.7	118.929	64.7404	159.534	82.6859	220.552	172.173	190.866	170.969	182.087
39	137	140.087	125.631	213.989	130.654	54.6345	128.945	104.592	127.599	139.936	170.764	142.452	128.36	138.375	99.4794	115.922	112.208	154.96	65.053	194.287	73.5723	202.289	163.149	192.79	170.006	183.142
40	144.878	111.975	169.016	207.961	117.279	46.8645	122.793	107.86	131.436	153.996	128.196	149.682	116.731	135.425	93.6142	122.96	141.373	172.971	79.1774	187.463	70.6021	184.363	184.463	190.579	161.24	171.05
41	138.765	91.585	135.951	188.082	107.724	44.4339	119.218	89.471	118.893	181.322	132.217	138.3	125.681	177.283	93.9125	126.409	166.139	163.327	62.9684	191.098	84.8897	160.437	182.355	176.433	154.546	140.055
42	144.248	86.414	119.459	176.4	131.376	52.5492	115.136	87.141	108.075	177.061	139.672	128.716	106.753	169.666	89.2971	130.381	161.9	131.553	69.3554	150.798	77.2267	183.647	152.779	128.757	157.434	134.578
43	156.712	83.364	132.461	178.934	132.988	61.4251	134.837	74.514	115.945	164.19	137.796	118.811	95.3434	185.506	85.0509	134.264	157.722	117.501	90.0571	179.243	88.7326	171.241	171.303	106.445	153.174	150.602
44	145.903	82.809	138.853	214.557	123.191	84.1847	127.273	79.726	120.645	151.642	155.993	99.414	91.0161	166.851	72.0311	138.581	165.752	146.907	109.486	204.259	94.5917	168.414	177.795	121.395	156.361	182.229
45	185.996	77.271	146.716	217.534	147.218	74.7457	140.434	60.288	121.718	131.177	179.779	91.906	93.8531	161.756	89.9567	120.8	159.168	166.641	102.264	232.894	91.2428	159.588	199.686	124.314	172.657	191.59
46	179.434	77.74	132.465	196.621	147.248	68.6287	153.677	58.594	125.262	140.56	181.372	106.791	87.4966	143.205	98.3563	133.24	138.568	170.537	106.406	202.154	82.3935	143.822	178.59	173.195	164.123	170.866
47	177.943	116.746	131.568	168.887	127.055	64.8439	143.518	53.616	128.175	117.851	165.216	126.885	88.606	137.259	88.0798	122.505	126.319	159.716	113.983	168.416	85.3318	145.439	178.077	150.149	141.543	153.56
48	163.225	118.492	132.872	173.74	112.783	50.93	150.32	57.843	128.536	121.46	143.316	122.626	112.51	137.297	97.6575	164.046	127.14	156.594	110.106	152.835	104.854	158.06	187.852	119.158	160.435	156.53
49	159.893	121.268	130.092	191.371	109.156	58.4197	144.216	63.429	116.392	120.009	154.9	131.573	129.09	131.392	94.3479	149.289	124.964	166.622	110.171	144.562	104.517	183.55	180.765	111.977	159.01	132.911
50	159.911	124.763	118.421	187.005	127.84	59.0019	130.221	70.634	112.1	110.815	170.793	134.115	113.279	124.64	119.583	157.8	125.136	174.736	105.411	135.125	109.624	193.815	189.027	115.999	167.522	138.003
Average	156.621	116.923	127.686	187.002	131.529	71.3124	128.788	101.68	126.417	139.02	164.773	138.661	118.384	156.595	107.643	114.697	132.545	159.737	101.086	164.753	89.3179	174.98	160.217	141.014	172.05	145.199
SD	13.3796	22.739	12.9059	35.7955	15.5624	13.931	10.7861	28.386	11.5223	27.4753	21.8772	22.6231	13.7207	22.9995	14.56	19.0948	18.6379	26.2901	18.3364	27.1317	15.6694	32.0561	21.2767	20.1919	14.4485	23.5598

## Sheet: 0.150 uM
0.150 uM Ca		Line witdh 7
	200213_091.nd2				200213_097.nd2				200213_093.nd2								200213_094.nd2
Background	108.11	130.561	108.11	130.561	130.561	128.115	108.924	128.115	109.398	133.04	109.398	133.04	109.398	133.04	109.398	133.04	109.064	133.316	109.064	133.316	109.064	133.316	109.064	133.316	109.064	133.316
	mCherry	GCaMP	mCherry	GCaMP	GCaMP	GCaMP	mCherry	GCaMP	mCherry	GCaMP	mCherry	GCaMP	mCherry	GCaMP	mCherry	GCaMP	mCherry	GCaMP	mCherry	GCaMP	mCherry	GCaMP	mCherry	GCaMP	mCherry	GCaMP
1	241.502	259.265	212.156	239.832	278.73	212.745	215.082	276.891	241.659	294.971	210.407	236.055	233.877	211.032	202.107	282.014	168.95	201.392	200.313	243.125	182.92	278.767	170.098	212.844	202.194	239.695
2	239.232	275.896	219.315	219.131	265.008	184.421	211.613	290.069	248.34	271.353	227.997	236.697	216.519	219.798	211.035	269.083	176.846	208.527	217.461	219.316	196.566	271.116	180.268	215.055	220.615	256.077
3	250.458	280.265	214.913	218.37	282.178	173.18	211.848	292.41	247.282	254.629	207.758	249.88	224.172	218.501	223.396	284.474	180.335	204.042	217.06	225.576	200.79	247.147	194.294	226.662	228.418	271.34
4	262.831	265.287	211.752	233.819	286.531	177.878	213.473	293.04	247.198	255.946	215.685	258.057	227.008	227.816	232.004	276.558	178.407	217.058	223.754	251.243	193.621	243.324	199.802	246.641	224.031	302.735
5	245.78	264.517	221.858	268.897	283.252	176.324	216.69	304.516	262.598	252.075	212.101	254.484	238.031	253.28	229.118	267.457	200.284	228.371	222.795	239.628	210.713	220.205	212.731	246.839	219.541	285.033
6	271.52	297.544	229.976	251.575	294.365	177.897	205.731	312.403	238.504	251.989	217.71	239.121	246.082	248.574	219.654	255.796	189.537	233.847	227.83	238.964	221.101	227.7	216.493	238.859	217.13	261.037
7	262.984	305.705	223.518	256.594	260.379	187.928	212.994	316.31	244.947	262.196	211.389	239.206	243.449	246.181	210.271	244.162	191.681	249.062	234.67	229.365	220.604	210.052	205.889	249.314	249.502	252.164
8	266.816	290.885	200.54	257.465	261.504	195.602	203.759	321.606	253.466	254.919	206.996	236.378	240.022	240.916	221.766	234.988	194.248	268	223.047	231.585	197.111	213.399	201.317	248.433	245.461	244.554
9	250.57	305.64	198.161	247.997	256.926	197.875	218.598	303.257	265.216	252.382	199.977	238.023	238.701	249.13	232.045	221.43	187.99	286.303	211.554	228.69	214.964	214.283	215.655	244.021	228.578	256.8
10	236.283	290.247	189.12	259.921	246.346	187.59	220.128	293.827	262.72	242.72	213.152	259.56	235.593	248.992	222.082	224.021	182.825	287.358	210.233	222.123	211.472	226.215	200.746	264.421	232.565	263.583
11	229.235	269.287	212.019	273.156	237.109	183.247	221.122	288.836	256.093	243.114	205.772	244.03	224.521	244.846	222.833	225.953	192.259	289.22	204.528	211.548	217.573	247.318	197.686	253.025	215.005	258.679
12	241.627	279.805	218.298	255.384	249.932	196.698	218.113	266.089	262.363	244.91	209.157	239.763	234.09	243.914	220.981	225.309	203.746	285.939	196.17	207.144	200.444	243.037	198.489	236.895	214.385	240.995
13	256.089	290.975	201.359	245.564	254.328	183.636	235.401	290.142	250.119	254.714	230.217	243.01	234.826	225.863	223.512	265.796	214.962	281.788	192.742	224.873	202.731	224.128	200.236	230.805	221.506	217.642
14	239.373	263.064	202.809	248.818	242.98	186.013	225.623	297.529	251.652	308.681	225.21	236.588	236.079	212.326	228.963	321.698	205.782	283.392	198.098	212.948	201.621	251.252	202.466	221.696	227.604	231.695
15	244.958	245.362	200.804	256.756	249.209	180.458	216.07	283.302	264.726	297.093	220.635	222.468	250.738	220.708	218.76	318.424	212.386	274.745	203.092	216.324	211.18	274.658	184.388	238.532	211.931	251.961
16	269.19	246.431	214.031	257.542	233.597	192.965	214.637	324.186	253.381	309.164	230.453	230.409	242.147	234.72	219.758	329.717	204.61	268.974	194.125	233.755	202.429	269.081	188.346	254.198	208.468	242.634
17	257.611	254.862	211.81	277.448	220.868	223.653	230.999	336.108	246.674	288.177	218.102	253.945	237.941	228.872	226.38	317.661	193.276	270.42	191.341	265.779	196.338	253.746	205.142	258.224	221.123	237.303
18	267.931	249.533	224.35	271.184	214.791	218.329	237.595	348.554	266.563	303.196	231.143	268.174	247.507	227.071	221.839	289.95	198.089	246.863	202.671	278.545	197.678	255.162	208.6	240.198	221.568	221.831
19	242.4	275.636	214.756	276.611	216.308	204.976	239.863	369.242	277.644	309.164	202.441	236.126	241.963	227.737	195.04	285.36	197.103	254.248	203.159	282.006	204.401	270.751	203.202	262.332	202.52	230.215
20	232.615	280.647	223.794	256.324	247.659	209.964	249.131	358.888	282.293	293.913	218.46	213.776	246.944	227.981	196.52	294.186	183.21	251.29	211.788	252.99	187.771	231.009	202.286	271.27	206.613	248.265
21	237.985	287.786	221.698	261.519	234.211	199.08	258.227	365.08	275.721	269.426	232.657	211.447	250.567	230.675	201.224	267.386	173.202	254.914	199.475	244.172	176.997	218.091	208.259	292.539	220.212	237.356
22	233.483	333.798	210.89	273.917	247.323	215.016	225.718	361.195	245.871	259.775	240.393	222.243	227.816	259.387	208	268.535	181.374	250.437	196.495	259.861	187.938	219.62	198.584	293.956	213.685	237.355
23	237.327	328.933	225.719	300.601	248.024	197.294	223.881	336.177	243.095	262.328	249.057	244.209	230.833	242.873	202.187	270.296	171.495	263.661	194.181	247.405	198.552	241.393	199.766	289.781	205.27	224.121
24	243.434	309.484	213.994	327.206	235.324	182.006	224.793	317.038	242.059	269.72	248.616	230.125	238.228	246.383	199.097	237.514	179.609	288.539	188.929	256.584	201.76	255.653	197.16	280.265	215.147	209.561
25	242.364	299.88	202.582	299.883	235.34	187.36	229.893	297.41	244.945	273.243	226.067	226.131	241.413	239.141	195.148	231.408	191.907	289.741	194.258	271.241	219.38	250.363	219.983	285.284	237.137	219.583
26	268.646	311.005	215.646	291.797	239.494	192.04	246.158	297.205	246.463	261.732	213.929	236.915	245.737	247.415	203.411	233.824	208.442	268.635	190.547	276.837	216.411	234.654	207.367	257.127	237.643	228.604
27	260.593	300.796	208.116	289.019	245.826	199.196	250.81	276.08	232.093	272.493	219.744	239.389	246.897	261.006	209.246	244.794	223.4	261.037	194.043	267.493	210.3	246.832	201.161	254.647	216.754	229.923
28	257.945	278.114	208.918	299.401	229.975	190.772	232.875	253.225	245.65	295.527	219.947	263.286	249.301	259.045	204.365	274.13	206.352	254.966	211.976	274.91	207.352	272.657	212.849	262.997	203.608	226.607
29	243.457	299.569	217.754	284.052	243.195	195.923	244.623	292.664	259.465	308.759	245.336	265.532	252.712	248.997	212.659	277.685	197.722	261.656	197.672	280.173	199.318	283.785	212.1	245.356	212.911	227.201
30	235.776	298.432	220.447	252.406	241.685	194.879	242.405	303.294	228.05	319.458	223.062	244.381	257.263	249.033	219.048	265.347	197.56	301.478	198.411	276.959	206.761	282.5	187.925	245.279	223.025	260.627
31	252.679	285.376	211.058	242.021	248.62	199.739	237.299	282.116	232.627	339.547	234.281	251.661	268.261	263.417	217.53	241.662	213.788	295.554	205.213	264.893	199.113	288.385	184.793	252.256	210.889	233.264
32	238.016	294.942	214.196	246.012	237.745	208.704	238.378	290.019	238.519	331.388	241.114	233.021	262.076	261.545	220.015	238.619	182.295	275.315	204.15	253.627	195.23	289.01	187.034	266.143	207.397	228.996
33	240.177	313.759	239.946	229.107	243.004	198.681	235.284	268.34	250.804	295.374	232.638	239.553	258.013	286.869	219.73	226.985	186.39	259.356	206.581	271.224	197.376	277.182	194.332	290.405	212.369	219.178
34	243.084	312.664	218.518	249.985	232.913	203.069	238.565	264.267	265.38	276.851	229.682	233.304	248.994	291.27	222.947	259.459	193.574	262.302	211.201	280.916	200.345	280.479	184.326	298.973	198.675	213.759
35	262.268	296.266	219.811	232.88	219.323	222.744	226.913	265.753	244.835	272.2	233.837	228.848	241.768	304.958	224.07	252.513	207.599	264.731	208.364	275.384	191.306	283.376	204.665	301.564	199.048	208.758
36	259.918	291.782	223.29	257.139	229.484	215.279	220.809	258.726	242.511	266.376	249.966	228.396	250.197	280.265	207.85	254.751	211.738	286.359	225.82	259.418	202.986	283.534	195.836	301.862	204.483	191.466
37	253.724	293.977	216.233	248.365	243.288	219.312	215.519	251.187	248.46	277.589	254.597	227.883	254.362	282.369	198.8	262.371	220.989	287.448	223.854	253.227	209.611	293.547	220.83	296.533	194.838	208.503
38	243.715	293.612	219.013	252.859	258.653	248.735	225.357	280.97	249.46	288.077	252.11	246.223	239.792	274.011	204.139	227.482	220.269	282.116	221.755	238.719	198.272	279.86	220.768	274.075	202.495	214.804
39	246.636	297.24	225.595	246.67	262.095	248.911	215.994	327.51	258.39	281.312	254.617	228.946	233.003	270.828	209.934	233.709	221.616	287.045	218.392	230.197	194.35	275.9	206.474	294.027	203.062	213.747
40	253.84	297.989	241.927	247.974	269.124	224.462	226.106	341.94	246.755	287.69	236.717	233.562	246.696	293.597	199.875	240.399	198.251	288.078	240.084	214.669	188.622	301.679	208.014	289.925	208.398	213.374
41	255.787	300.589	221.435	268.758	262.517	212.498	215.468	310.039	271.379	273.114	241.904	229.796	245.522	291.399	204.149	253.382	200.712	278.911	218.403	219.358	200.063	301.126	197.329	289.291	188.795	228.744
42	250.153	314.141	224.633	289.615	268.568	199.593	218.56	309.93	254.478	256.585	252.039	226.601	237.829	286.451	212.997	261.893	204.332	289.592	235.795	230.005	200.696	294.973	202.763	273.041	185.236	229.376
43	259.474	305.697	225.664	265.51	281.51	222.186	208.243	315.862	247.182	267.776	249.014	239.388	249.776	304.443	211.529	272.519	196.912	275.171	222.02	227.886	191.205	281.81	207.292	280.079	184.522	221.887
44	254.196	306.246	212.438	254.758	256.216	223.964	222.846	324.218	246.132	266.514	256.207	231.703	274.899	300.482	209.859	289.191	199.778	290.756	221.764	231.937	191.616	304.24	199.82	286.974	189.917	216.846
45	241.589	288.956	226.315	243.39	254.677	223.077	224.541	327.511	243.706	276.729	246.47	221.943	276.385	328.441	205.469	283.057	201.49	287.398	231.207	215.559	189.013	285.994	198.972	270.388	179.802	220.023
46	244.523	275.363	211.398	236.456	246.628	231.318	205.978	326.159	242.527	277.836	267.056	257.104	277.687	331.649	203.435	281.326	193.992	274.713	216.864	217.179	189.49	284.376	191.195	257.787	197.74	236.689
47	246.382	275.004	221.453	249.192	291.141	227.681	201.857	314.538	252.493	288.125	253.087	257.319	248.675	330.687	206.766	306.343	207.98	269.857	212.312	244.607	185.274	277.593	192.276	255.08	196.122	223.909
48	248.61	294.092	218.704	236.77	307.029	239.733	228.518	304.773	261.288	272.862	289.705	257.406	233.043	313.535	216.908	290.834	230.152	246.712	203.594	259.903	198.103	251.386	198.899	278.766	180.079	232.46
49	256.343	354.274	226.462	233.946	340.434	234.473	217.404	281.401	249.054	284.361	281.668	265.274	236.074	291.099	225.968	264.56	197.654	241.355	194.712	266.464	192.163	259.744	188.608	254.032	180.285	234.77
50	261.589	374.995	240.234	248.035	313.623	247.156	236.806	311.903	254.368	264.702	263.542	268.41	234.681	254.731	195.707	278.813	203.077	228.473	198.607	252.917	184.444	275.825	186.85	254.387	182.49	241.929
Average	249.654	292.112	216.988	258.633	254.98	205.125	225.166	304.475	251.744	277.656	233.076	240.515	243.974	259.685	213.003	264.496	197.604	265.143	209.462	245.585	199.922	260.958	200.087	262.662	210.216	234.953
SD	10.8366	24.8455	10.4475	22.1853	25.4943	20.1312	13.0701	29.0366	11.5134	22.5326	20.4153	14.0659	12.9176	32.0093	10.5712	27.5929	14.2096	24.7071	13.3723	22.3813	10.2387	26.5891	10.8132	23.5582	16.7849	20.7346
Background subtraction
1	133.392	128.704	104.046	109.271	148.169	84.6297	106.158	148.776	132.261	161.931	101.01	103.015	124.479	77.992	92.7095	148.974	59.8864	68.076	91.2488	109.809	73.8556	145.451	61.0343	79.5284	93.1298	106.379
2	131.122	145.335	111.205	88.57	134.447	56.3059	102.689	161.954	138.942	138.314	118.599	103.657	107.121	86.758	101.637	136.043	67.7818	75.211	108.397	85.9998	87.5016	137.8	71.2041	81.7395	111.551	122.761
3	142.348	149.704	106.803	87.809	151.617	45.065	102.924	164.295	137.884	121.589	98.3599	116.84	114.774	85.461	113.998	151.434	71.2706	70.726	107.996	92.2597	91.7261	113.831	85.2296	93.346	119.355	138.024
4	154.721	134.726	103.642	103.258	155.97	49.7631	104.549	164.925	137.8	122.906	106.287	125.017	117.61	94.776	122.606	143.518	69.3427	83.742	114.69	117.927	84.5568	110.008	90.7384	113.325	114.967	169.419
5	137.67	133.956	113.748	138.336	152.691	48.2091	107.766	176.401	153.2	119.035	102.703	121.444	128.633	120.24	119.72	134.417	91.2198	95.055	113.731	106.312	101.649	86.8893	103.667	113.523	110.477	151.717
6	163.41	166.983	121.866	121.014	163.804	49.782	96.8067	184.288	129.106	118.949	108.312	106.081	136.684	115.534	110.256	122.756	80.4732	100.531	118.766	105.648	112.037	94.3843	107.429	105.543	108.066	127.721
7	154.874	175.144	115.408	126.033	129.818	59.8126	104.07	188.195	135.549	129.156	101.991	106.166	134.051	113.141	100.873	111.122	82.6166	115.746	125.606	96.0492	111.54	76.7356	96.8253	115.998	140.438	118.848
8	158.706	160.324	92.4298	126.904	130.943	67.4872	94.835	193.491	144.068	121.879	97.5981	103.338	130.624	107.876	112.368	101.948	85.1839	134.684	113.983	98.2693	88.0469	80.083	92.2535	115.117	136.397	111.238
9	142.46	175.079	90.0509	117.436	126.365	69.7599	109.674	175.142	155.818	119.342	90.5794	104.983	129.303	116.09	122.647	88.39	78.9261	152.987	102.49	95.374	105.9	80.9668	106.591	110.705	119.514	123.484
10	128.173	159.686	81.0102	129.36	115.785	59.4747	111.204	165.712	153.322	109.68	103.754	126.52	126.195	115.952	112.684	90.981	73.7607	154.042	101.169	88.8074	102.408	92.8986	91.682	131.105	123.501	130.267
11	121.125	138.726	103.909	142.595	106.548	55.1322	112.198	160.721	146.695	110.074	96.374	110.99	115.123	111.806	113.435	92.913	83.1949	155.904	95.464	78.2324	108.509	114.002	88.6222	119.709	105.941	125.363
12	133.517	149.244	110.188	124.823	119.371	68.5832	109.189	137.974	152.965	111.87	99.7591	106.723	124.692	110.874	111.583	92.269	94.6825	152.623	87.1064	73.828	91.3802	109.721	89.4254	103.579	105.321	107.679
13	147.979	160.414	93.2486	115.003	123.767	55.5214	126.477	162.027	140.721	121.674	120.819	109.97	125.428	92.823	114.114	132.756	105.898	148.472	83.678	91.557	93.6671	90.8124	91.1723	97.4886	112.442	84.326
14	131.262	132.503	94.6985	118.257	112.419	57.898	116.699	169.414	142.254	175.641	115.812	103.548	126.681	79.286	119.565	188.658	96.7183	150.076	89.0342	79.6318	92.5572	117.936	93.4018	88.3803	118.54	98.379
15	136.848	114.801	92.6944	126.195	118.648	52.3432	107.146	155.187	155.328	164.053	111.237	89.4275	141.34	87.668	109.362	185.384	103.322	141.429	94.028	83.0076	102.117	141.342	75.3241	105.216	102.867	118.645
16	161.08	115.87	105.921	126.981	103.036	64.8497	105.713	196.071	143.983	176.124	121.055	97.3692	132.749	101.68	110.36	196.677	95.5456	135.658	85.061	100.439	93.3651	135.765	79.2825	120.882	99.4042	109.318
17	149.501	124.301	103.7	146.887	90.307	95.538	122.075	207.993	137.276	155.137	108.704	120.905	128.543	95.832	116.982	184.621	84.2116	137.104	82.2769	132.463	87.2739	120.43	96.0781	124.908	112.059	103.987
18	159.821	118.972	116.24	140.623	84.23	90.2141	128.671	220.439	157.165	170.156	121.745	135.134	138.109	94.031	112.441	156.91	89.025	113.547	93.6067	145.229	88.6141	121.846	99.5361	106.882	112.504	88.515
19	134.291	145.075	106.646	146.05	85.747	76.8607	130.939	241.127	168.246	176.124	93.0428	103.086	132.565	94.697	85.6421	152.32	88.0388	120.932	94.0946	148.69	95.3367	137.435	94.1379	129.016	93.4559	96.899
20	124.505	150.086	115.684	125.763	117.098	81.8492	140.207	230.773	172.895	160.873	109.062	80.7356	137.546	94.941	87.1216	161.146	74.1463	117.974	102.725	119.674	78.7067	97.6928	93.2217	137.954	97.5486	114.949
21	129.875	157.225	113.588	130.958	103.65	70.9651	149.303	236.965	166.323	136.386	123.259	78.4071	141.169	97.635	91.8255	134.346	64.138	121.598	90.4105	110.856	67.9327	84.7751	99.1952	159.223	111.148	104.04
22	125.373	203.237	102.78	143.356	116.762	86.901	116.794	233.08	136.473	126.735	130.995	89.2028	118.418	126.347	98.6025	135.495	72.3095	117.121	87.4314	126.545	78.874	86.3043	89.5201	160.64	104.621	104.039
23	129.217	198.372	117.609	170.04	117.463	69.1788	114.957	208.062	133.697	129.288	139.659	111.169	121.435	109.833	92.7887	137.256	62.431	130.345	85.117	114.089	89.488	108.077	90.7016	156.465	96.206	90.805
24	135.324	178.923	105.884	196.645	104.763	53.8913	115.869	188.923	132.661	136.68	139.218	97.0845	128.83	113.343	89.6989	104.474	70.5454	155.223	79.8647	123.268	92.6957	122.337	88.096	146.949	106.083	76.245
25	134.254	169.319	94.4717	169.322	104.779	59.2448	120.969	169.295	135.547	140.203	116.669	93.0908	132.015	106.101	85.7497	98.368	82.843	156.425	85.1945	137.925	110.316	117.047	110.919	151.968	128.073	86.267
26	160.536	180.444	107.536	161.236	108.933	63.925	137.234	169.09	137.065	128.692	104.531	103.875	136.339	114.375	94.0128	100.784	99.3782	135.319	81.4833	143.521	107.347	101.338	98.3034	123.811	128.579	95.288
27	152.483	170.235	100.006	158.458	115.265	71.0806	141.886	147.965	122.695	139.453	110.346	106.349	137.499	127.966	99.8485	111.754	114.337	127.721	84.9795	134.177	101.236	113.516	92.0968	121.331	107.69	96.607
28	149.835	147.553	100.808	168.84	99.414	62.6568	123.951	125.11	136.252	162.487	110.549	130.246	139.903	126.005	94.9673	141.09	97.2879	121.65	102.912	141.594	98.2883	139.341	103.785	129.681	94.5443	93.291
29	135.347	169.008	109.644	153.491	112.634	67.8079	135.699	164.549	150.067	175.719	135.938	132.492	143.314	115.957	103.261	144.645	88.6576	128.34	88.6082	146.857	90.2543	150.469	103.036	112.04	103.847	93.885
30	127.666	167.871	112.337	121.845	111.124	66.7641	133.481	175.179	118.652	186.418	113.664	111.341	147.865	115.993	109.65	132.307	88.4965	168.162	89.3473	143.643	97.697	149.184	78.8615	111.963	113.961	127.311
31	144.569	154.815	102.948	111.46	118.059	71.624	128.375	154.001	123.229	206.507	124.883	118.621	158.863	130.377	108.132	108.622	104.724	162.238	96.1485	131.577	90.0492	155.069	75.7289	118.94	101.825	99.948
32	129.906	164.381	106.086	115.451	107.184	80.5895	129.454	161.904	129.121	198.348	131.716	99.9809	152.678	128.505	110.617	105.579	73.2313	141.999	95.086	120.311	86.1662	155.694	77.9698	132.827	98.3327	95.68
33	132.067	183.198	131.836	98.546	112.443	70.5663	126.36	140.225	141.406	162.334	123.24	106.513	148.615	153.829	110.332	93.945	77.326	126.04	97.5173	137.908	88.3123	143.866	85.2675	157.089	103.305	85.862
34	134.974	182.103	110.408	119.424	102.352	74.9535	129.641	136.152	155.982	143.811	120.284	100.264	139.596	158.23	113.549	126.419	84.51	128.986	102.137	147.6	91.2814	147.163	75.2623	165.657	89.6108	80.443
35	154.158	165.705	111.701	102.319	88.762	94.6295	117.989	137.638	135.437	139.16	124.439	95.8084	132.37	171.918	114.672	119.473	98.5353	131.415	99.3001	142.068	82.2419	150.06	95.6006	168.248	89.9841	75.442
36	151.808	161.221	115.18	126.578	98.923	87.1641	111.885	130.611	133.113	133.336	140.568	95.3556	140.799	147.225	98.4524	121.711	102.674	153.043	116.756	126.102	93.9223	150.218	86.7719	168.546	95.419	58.15
37	145.614	163.416	108.123	117.804	112.727	91.1966	106.595	123.072	139.062	144.549	145.199	94.8427	144.964	149.329	89.4022	129.331	111.925	154.132	114.79	119.911	100.547	160.231	111.766	163.217	85.7737	75.187
38	135.605	163.051	110.903	122.298	128.092	120.62	116.433	152.855	140.062	155.037	142.712	113.183	130.394	140.971	94.7406	94.442	111.205	148.8	112.691	105.403	89.2082	146.544	111.704	140.759	93.431	81.488
39	138.526	166.679	117.485	116.109	131.534	120.796	107.07	199.395	148.992	148.272	145.219	95.9059	123.605	137.788	100.536	100.669	112.552	153.729	109.328	96.8811	85.2861	142.584	97.4102	160.711	93.9977	80.431
40	145.73	167.428	133.817	117.413	138.563	96.3471	117.182	213.825	137.357	154.65	127.319	100.522	137.298	160.557	90.4775	107.359	89.1867	154.762	131.02	81.3534	79.5577	168.363	98.95	156.609	99.3343	80.058
41	147.677	170.028	113.325	138.197	131.956	84.3825	106.544	181.924	161.981	140.074	132.506	96.7562	136.124	158.359	94.7512	120.342	91.648	145.595	109.339	86.042	90.9987	167.81	88.265	155.975	79.7311	95.428
42	142.043	183.58	116.523	159.054	138.007	71.4778	109.636	181.815	145.08	123.545	142.641	93.5605	128.431	153.411	103.599	128.853	95.2676	156.276	126.731	96.6886	91.6315	161.657	93.6986	139.725	76.1717	96.06
43	151.364	175.136	117.554	134.949	150.949	94.0711	99.3188	187.747	137.784	134.736	139.616	106.348	140.378	171.403	102.131	139.479	87.8478	141.855	112.956	94.5695	82.1407	148.494	98.2282	146.763	75.4583	88.571
44	146.086	175.685	104.328	124.197	125.655	95.8495	113.922	196.103	136.734	133.475	146.809	98.6629	165.501	167.442	100.461	156.151	90.7135	157.44	112.7	98.6206	82.5521	170.924	90.756	153.657	80.8532	83.53
45	133.479	158.395	118.205	112.829	124.116	94.9615	115.617	199.396	134.308	143.689	137.072	88.9026	166.987	195.401	96.0712	150.017	92.426	154.082	122.143	82.2425	79.949	152.678	89.9085	137.072	70.7376	86.707
46	136.413	144.802	103.288	105.895	116.067	103.203	97.0545	198.044	133.129	144.796	157.658	124.064	168.289	198.609	94.0369	148.286	84.9275	141.397	107.8	83.8627	80.4263	151.06	82.131	124.471	88.6756	103.373
47	138.272	144.443	113.343	118.631	160.58	99.566	92.9328	186.423	143.095	155.085	143.689	124.279	139.277	197.647	97.3682	173.303	98.9163	136.541	103.248	111.291	76.2101	144.277	83.2118	121.764	87.0578	90.593
48	140.5	163.531	110.594	106.209	176.468	111.618	119.594	176.658	151.89	139.822	180.307	124.366	123.645	180.495	107.51	157.794	121.088	113.396	94.5299	126.587	89.0389	118.07	89.8347	145.45	71.0155	99.144
49	148.233	223.713	118.352	103.385	209.873	106.358	108.48	153.286	139.656	151.321	172.27	132.234	126.676	158.059	116.57	131.52	88.5901	108.039	85.6484	133.148	83.0993	126.428	79.5441	120.716	71.221	101.454
50	153.479	244.434	132.124	117.474	183.062	119.041	127.882	183.788	144.97	131.662	154.144	135.37	125.283	121.691	86.3094	145.773	94.0131	95.157	89.543	119.601	75.3796	142.509	77.7855	121.071	73.4259	108.613
Average	141.544	161.551	108.878	128.072	124.419	77.0102	116.242	176.36	142.346	144.616	123.678	107.475	134.576	126.645	103.605	131.456	88.5395	131.827	100.398	112.269	90.8575	127.642	91.0233	129.346	101.152	101.637
SD	10.8366	24.8455	10.4475	22.1853	25.4943	20.1312	13.0701	29.0366	11.5134	22.5326	20.4153	14.0659	12.9176	32.0093	10.5712	27.5929	14.2096	24.7071	13.3723	22.3813	10.2387	26.5891	10.8132	23.5582	16.7849	20.7346

## Sheet: 0.100 uM
0.100 uM Ca		Line witdh 7
	200213_096.nd2				200213_097.nd2						200213_098.nd2						200213_099.nd2				200213_100.nd2
Background	111.778	134.758	111.778	134.758	110.283	132.852	110.283	132.852	110.283	132.852	110.215	134.799	110.215	134.799	110.215	134.799	110.296	132.621	110.296	132.621	107.967	131.659	107.967	131.659	107.967	131.659
	mCherry	GCaMP	mCherry	GCaMP	mCherry	GCaMP	mCherry	GCaMP	mCherry	GCaMP	mCherry	GCaMP	mCherry	GCaMP	mCherry	GCaMP	mCherry	GCaMP	mCherry	GCaMP	mCherry	GCaMP	mCherry	GCaMP	mCherry	GCaMP
1	232.029	205.345	243.055	184.236	223.093	198.968	218.887	199.609	214.583	249.163	219.901	198.337	206.053	217.105	216.247	192.091	231.042	280.784	227.57	251.585	236.878	192.425	250.205	219.864	215.995	181.858
2	239.569	187.672	261.65	184.701	235.563	211.883	214.952	202.246	223.021	231.448	220.874	203.551	213.687	226.852	242.095	191.441	243.091	281.887	238.688	249.062	233.5	212.844	262.773	248.471	217.459	184.406
3	245.999	190.534	251.575	189.323	242.349	208.931	206.081	199.557	225.925	221.942	246.341	205.097	208.371	211.637	247.09	203.69	241.99	273.546	272.517	243.428	233.682	197.856	270.047	253.565	237.842	172.766
4	237.493	209.152	238.02	196.724	238.093	216.969	203.7	192.84	227.742	235.774	252.794	206.686	202.434	217.909	233.282	196.571	237.604	265.334	267.299	226.133	223.869	189.066	273.743	232.976	217.043	170.676
5	236.917	201.476	241.377	190.699	227.451	216.793	205.271	179.88	238.172	217.63	259.086	195.847	223.052	213.259	234.626	206.489	250.887	263.049	278.307	209.652	221.898	191.447	252.889	238.665	212.285	179.06
6	250.727	209.991	269.673	191.422	235.75	207.917	206.638	201.044	236.092	222.368	243.362	217.401	217.7	193.055	223.919	194.733	251.326	248.147	258.996	211.663	256.934	211.941	245.605	223.317	196.495	175.707
7	255.057	209.431	249.074	189.902	227.867	211.417	229.73	208.532	229.258	244.591	236.327	225.618	210.044	188.955	236.112	185.101	242.584	243.207	248.637	212.802	233.878	211.655	247.413	248.661	220.743	174.797
8	240.591	211.282	252.824	200.96	224.164	199.127	212.781	217.351	250.408	255.782	236.305	241.438	212.519	198.231	237.142	205.463	240.442	246.186	269.518	207.302	237.923	213.56	237.797	233.174	226.697	194.412
9	239.572	206.301	242.118	198.06	221.831	180.292	201.283	200.385	251.192	256.144	206.198	257.637	224.159	208.865	228.259	215.947	235.123	236.307	270.489	200.513	224.951	220.724	247.768	224.061	214.147	194.421
10	253.203	207.404	236.248	197.16	229.648	184.198	218.704	208.443	248.416	243.522	205.753	245.719	203.297	193.895	211.735	219.427	237.133	250.325	271.137	211.866	223.53	241.914	224.073	239.196	206.142	186.846
11	253.308	204.35	242.672	205.333	233.283	187.798	224.239	204.025	228.913	262.666	228.59	217.503	206.317	195.261	214.672	208.047	244.627	241.291	269.777	212.817	231.792	236.224	234.69	246.981	224.376	183.161
12	250.133	210.155	243.216	218.341	217.21	177.364	208.464	214.171	217.409	232.72	228.406	208.481	207.807	197.276	212.767	196.405	255.242	236.282	277.445	226.413	237.128	232.828	235.327	230.389	212.157	183.288
13	251.168	222.315	255.621	236.888	223.41	192.527	212.387	210.265	234.593	219.079	227.676	199.185	197.943	201.602	215.204	191.725	255.8	233.548	266.844	212.227	251.448	215.087	217.658	226.222	184.604	185.672
14	260.693	203.696	278.559	229.97	221.213	197.635	189.058	187.502	239.441	228.179	240.477	201.059	197.936	210.573	225.874	192.015	258.865	227.966	264.511	253.171	235.045	214.45	244.961	222.362	198.293	186.086
15	239.448	194.724	272.324	207.096	239.684	192.453	204.668	199.206	228.817	229.081	242.279	196.324	204.096	192.69	218.519	202.933	248.013	229.905	265.84	253.61	240.114	220.28	234.458	232.957	199.395	185.612
16	274.873	193.585	254.479	188.112	223.719	193.443	214.84	219.803	214.537	253.664	247.186	206.161	212.589	196.168	210.556	219.895	244.393	242.653	284.698	262.836	259.084	205.44	227.264	219.491	184.34	175.74
17	285.15	205.528	247.344	177.854	224.923	197.374	203.934	221.756	216.334	247.619	229.121	198.938	207.634	220.233	215.23	200.491	223.35	244.637	245.117	255.005	247.605	225.276	236.469	214.28	204.005	183.622
18	277.816	183.571	261.03	187.461	220.315	209.086	196.103	215.967	239.546	267.164	224.151	196.185	207.492	214.96	227.454	207.132	257.033	243.357	253.186	266.904	254.822	212.915	217.739	217.047	208.698	187.006
19	275.562	191.331	227.435	194.89	201.987	209.029	210.339	206.213	236.857	263.757	217.307	200.562	200.843	229.5	223.799	195.685	241.368	222.516	240.674	253.365	246.236	225.753	215.943	227.923	208.588	199.356
20	293.858	184.604	248.067	195.612	219.444	223.753	207.206	221.519	250.266	259.244	214.318	210.018	209.233	226.423	231.345	199.583	244.197	221.444	236.597	251.817	252.492	210.572	217.356	235.456	223.631	185.996
21	282.271	191.47	234.225	208.399	221.731	219.375	216.172	231.539	257.432	243.918	229.086	218.436	217.306	221.385	247.69	191.263	250.383	216.679	239.083	242.392	231.514	209.794	210.239	221.771	218.892	182.24
22	261.344	180.488	232.501	206.914	221.13	203.237	217.305	230.529	242.479	221.282	220.931	193.369	217.398	219.056	232.163	197.629	238.859	221.906	256.207	237.818	247.736	202.953	227.347	217.844	234.296	173.331
23	250.827	177.439	231.979	212.492	220.5	226.137	215.422	211.758	263.193	227.849	247.464	209.023	211.86	208.822	250.916	196.543	236.957	239.324	264.072	239.565	237.831	208.46	235.998	233.109	239.559	185.826
24	248.862	176.419	227.989	206.364	224.605	225.825	225.147	218.325	257.202	216.295	236.877	203.537	204.527	205.63	249.467	193.772	247.378	237.443	237.102	233.893	257.483	216.173	244.703	224.97	230.546	187.906
25	259.421	179.069	243.142	205.467	230.827	213.907	224.496	215.665	268.045	212.113	224.78	214.825	205.707	204.649	241.968	220.745	245.206	239.534	230.387	226.694	242.857	209.935	251.105	240.48	218.43	186.625
26	279.544	171.523	246.36	227.174	225.556	210.561	231.628	236.208	253.398	207.011	226.855	224	201.677	206.022	240.827	220.83	223.205	252.852	233.537	232.764	231.666	219.922	261.157	235.28	230.276	192.146
27	267.362	165.817	230.34	209.97	235.288	220.058	224.806	234.29	232.525	217.712	209.538	221.972	206.621	205.93	238.3	217.019	237.114	244.916	228.064	233.07	245.905	205.028	251.99	250.397	234.757	187.597
28	277.485	171.833	219.696	205.218	239.853	220.751	229.585	228.688	235.169	225.985	228.039	224.866	197.991	197.433	227.042	227.89	257.471	236.653	215.098	224.99	239.41	215.03	231.05	257.988	234.645	187.75
29	273.149	179.711	244.015	208.496	260.202	223.826	240.008	230.472	247.838	241.647	205.696	218.207	197.396	196.482	220.942	205.975	238.815	235.614	226.231	221.136	233.498	205.83	251.475	262.442	254.238	180.237
30	290.96	186.303	258.769	210.178	260.003	209.507	257.479	226.489	263.014	241.242	196.619	200.095	199.069	210.848	234.696	210.025	258.29	238.497	238.758	231.511	238.965	220.858	261.483	271.117	229.213	198.749
31	333.899	195.511	261.33	206.42	271.389	221.681	268.287	227.772	248.783	265.754	205.121	192.502	210.816	214.216	233.89	223.61	260.806	219.46	244.066	227.505	252.322	218.599	252.23	265.988	225.233	188.647
32	317.815	183.105	245.727	199.495	245.567	229.309	292.688	212.356	238.899	269.785	207.998	211.862	216.621	229.39	228.721	228.956	235.911	202.733	242.966	221.267	243.809	223.4	256.394	274.362	216.014	170.31
33	281.305	196.37	229.762	195.279	224.167	211.569	263.012	203.393	256.654	262.073	190.342	210.179	223.65	250.691	225.901	207.753	236.641	213.903	245.099	233.849	231.191	211.528	251.057	279.154	212.09	166.206
34	270.985	198.159	256.954	202.046	232.133	201.651	238.591	187.964	245.365	243.028	197.979	214.071	232.268	238.943	236.172	219.458	238.057	213.558	248.285	247.872	222.319	209.926	248.001	269.448	223.313	170.366
35	269.927	187.02	229.079	224.929	232.074	213.34	239.433	187.534	228.643	230.333	213.465	209.516	235.843	229.338	221.239	200.919	224.498	237.611	239.206	249.764	233.949	211.821	257.368	271.204	221.741	172.528
36	266.949	186.423	225.581	213.367	249.643	225.918	232.53	178.523	232.541	218.107	214.031	212.166	246.832	215.358	220.274	190.703	226.509	250.773	230.069	235.006	253.931	205.355	255.014	264.332	230.788	173.524
37	270.774	183.517	229.754	200.236	265.58	223.598	221.378	177.539	223.746	225.387	214.762	199.423	239.738	216.774	212.844	213.04	222.674	235.649	236.665	231.503	246.543	226.643	242.592	261.708	229.198	187.697
38	285.129	196.106	255.415	207.813	274.994	223.266	221.664	181.756	225.124	235.579	204.898	193.313	246.085	228.002	208.491	226.592	220.409	228.47	234.973	236.354	250.667	234.575	246.396	247.443	228.548	179.323
39	261.756	203.248	241.12	217.329	295.046	246.091	241.623	191.348	231.951	239.434	216.059	184.223	236.149	229.166	210.526	226.139	238.213	220.718	241.915	220.844	240.533	229.237	248.912	244.583	203.897	181.981
40	279.789	215.855	224.79	224.066	259.435	251.511	234.036	187.963	229.251	257.028	208.367	202.996	226.813	246.307	214.906	214.212	221.788	219.692	236.725	236.172	238.003	229.004	236.09	226.933	203.578	195.876
41	284.35	217.126	227.925	210.525	246.063	234.907	227.795	182.212	227.774	281.726	211.102	220.605	241.88	247.138	208.007	221.581	220.792	214.909	251.511	259.19	239.398	229.023	242.128	249.686	188.751	205.559
42	295.872	209.559	247.681	214.449	265.611	211.547	228.33	183.124	234.605	259.077	224.115	219.881	256.685	240.689	212.537	219.083	215.305	202.628	241.796	262.909	239.408	212.685	240.594	239.763	192.12	204.832
43	308.627	209.981	260.29	243.69	260.469	210.573	236.721	203.092	229.629	237.82	239.821	216.356	255.41	248.052	215.815	200.311	217.038	225.571	240.539	250.223	230.531	205.121	234.275	252.253	198.85	216.827
44	283.194	201.932	241.495	243.313	253.854	212.808	246.444	204.386	237.993	239.919	251.708	199.117	262.351	233.917	209.159	198.459	209.565	246.127	267.299	249.255	251.117	217.689	236.062	242.253	182.214	213.298
45	252.359	197.998	246.655	235.073	274.744	207.633	235.849	223.406	237.432	236.592	257.787	197.795	239.534	237.039	208.473	207.72	213.936	235.668	272.475	237.333	242.91	209.696	242.336	236.762	188.762	202.007
46	269.481	194.081	235.726	223.922	263.681	199.722	231.894	237.212	222.491	239.638	261.91	202.987	238.913	240.383	200.518	191.625	214.356	235.016	254.814	241.02	228.906	208.457	255.266	246.896	193.625	209.132
47	246.241	197.896	229.346	211.368	249.245	215.239	237.09	246.216	219.621	251.055	264.16	206.226	234.411	244.463	221.032	201.36	215.587	233.312	272.629	234.09	229.843	200.443	239.214	244.433	202.432	204.107
48	243.057	208.503	242.959	218.062	251.459	214.199	232.312	229.741	220.129	251.434	227.684	218.371	244.91	258.628	217.537	190.729	215.954	217.246	276.756	242.951	222.1	223.767	246.54	243.774	199.986	195.564
49	258.952	220.624	222.406	217.444	231.466	213.508	223.259	219.824	209.077	239.833	234.465	202.654	232.946	257.75	214.525	196.51	216.504	245.212	265.494	243.825	220.831	225.675	241.847	257.08	202.092	194.728
50	259.126	215.945	215.725	211.881	219.78	213.093	254.493	203.666	210.651	220.592	229.25	203.779	228.437	282.092	227.328	192.614	201.55	270.16	260.128	256.644	230.696	191.901	234.077	269.672	200.585	206.198
Average	266.48	196.63	243.102	207.722	238.742	211.426	225.575	208.866	235.644	240.016	226.547	209.562	219.661	220.381	224.757	205.559	235.678	237.284	251.596	236.272	238.774	214.416	242.542	242.764	213.632	187.432
SD	21.7336	13.8135	14.0783	15.2601	19.2504	14.8811	19.5072	17.733	14.3783	17.2431	18.0358	13.8607	17.6739	20.641	12.5455	12.1684	14.9775	17.923	17.0426	16.32	10.3691	11.842	13.8491	17.2191	16.5126	11.9422
Background subtraction
1	120.251	70.5868	131.277	49.4784	112.81	66.1164	108.604	66.7569	104.3	116.311	109.686	63.5375	95.8378	82.3063	106.032	57.2917	120.746	148.163	117.274	118.964	128.911	60.7658	142.238	88.2049	108.028	50.1988
2	127.791	52.9137	149.872	49.9427	125.28	79.0306	104.669	69.394	112.738	98.5957	110.659	68.7521	103.472	92.0535	131.88	56.6417	132.795	149.266	128.392	116.441	125.533	81.1846	154.806	116.812	109.492	52.747
3	134.221	55.7764	139.797	54.5654	132.066	76.0793	95.798	66.7053	115.642	89.0899	136.126	70.2979	98.1558	76.8385	136.875	68.8912	131.694	140.925	162.221	110.807	125.715	66.1968	162.08	121.906	129.875	41.1067
4	125.715	74.3937	126.242	61.9656	127.81	84.1172	93.417	59.9881	117.459	102.922	142.579	71.8868	92.2186	83.1096	123.067	61.7719	127.308	132.713	157.003	93.5121	115.902	57.4071	165.776	101.317	109.076	39.0168
5	125.139	66.718	129.599	55.9408	117.168	83.9412	94.988	47.0275	127.889	84.7783	148.871	61.0478	112.837	78.4604	124.411	71.6901	140.591	130.428	168.011	77.0307	113.931	59.7881	144.922	107.006	104.318	47.4006
6	138.949	75.2328	157.895	56.6638	125.467	75.0654	96.355	68.1919	125.809	89.5163	133.147	82.6023	107.485	58.2562	113.704	59.9341	141.03	115.526	148.7	79.0419	148.967	80.2824	137.638	91.6577	88.5278	44.0476
7	143.279	74.6734	137.296	55.1439	117.584	78.5651	119.447	75.6804	118.975	111.739	126.112	90.8191	99.8295	54.1556	125.897	50.3023	132.288	110.586	138.341	80.1811	125.911	79.9956	139.447	117.002	112.776	43.1382
8	128.813	76.5236	141.046	66.2016	113.881	66.2755	102.498	84.499	140.125	122.93	126.09	106.639	102.304	63.4321	126.927	70.664	130.146	113.565	159.222	74.6809	129.956	81.901	129.83	101.515	118.73	62.7533
9	127.794	71.5433	130.34	63.3016	111.548	47.4395	91	67.5327	140.909	123.292	95.9831	122.838	113.944	74.0665	118.044	81.1484	124.827	103.686	160.193	67.8922	116.984	89.065	139.801	92.4018	106.18	62.7619
10	141.425	72.6457	124.47	62.4019	119.365	51.3459	108.421	75.5912	138.133	110.67	95.5379	110.92	93.0818	59.0961	101.52	84.6283	126.837	117.704	160.841	79.2447	115.563	110.255	116.106	107.537	98.1754	55.1874
11	141.53	69.5919	130.894	70.5755	123	54.9459	113.956	71.173	118.63	129.814	118.375	82.7042	96.1024	60.4622	104.457	73.2476	134.331	108.67	159.481	80.1959	123.825	104.565	126.723	115.322	116.409	51.5018
12	138.355	75.3965	131.438	83.5829	106.927	44.5124	98.181	81.3191	107.126	99.8683	118.191	73.6818	97.5924	62.4772	102.552	61.6059	144.946	103.661	167.149	93.7919	129.161	101.169	127.36	98.73	104.19	51.6295
13	139.39	87.5575	143.843	102.13	113.127	59.6746	102.104	77.4133	124.31	86.2268	117.461	64.3856	87.7277	66.8032	104.989	56.9263	145.504	100.927	156.548	79.6058	143.481	83.428	109.691	94.5626	76.6367	54.0129
14	148.915	68.9382	166.781	95.2121	110.93	64.7831	78.775	54.6505	129.158	95.327	130.262	66.2604	87.7207	75.7736	115.659	57.2158	148.569	95.345	154.215	120.55	127.078	82.7908	136.994	90.7033	90.3256	54.4268
15	127.67	59.9663	160.546	72.3378	129.401	59.601	94.385	66.3544	118.534	96.2294	132.064	61.5246	93.8812	57.891	108.304	68.1339	137.717	97.284	155.544	120.989	132.147	88.6213	126.491	101.298	91.4277	53.9529
16	163.095	58.8274	142.701	53.3542	113.436	60.5907	104.557	86.951	104.254	120.812	136.971	71.3618	102.374	61.3695	100.341	85.0957	134.097	110.032	174.402	130.215	151.118	73.7811	119.297	87.8322	76.3735	44.0808
17	173.372	70.7702	135.566	43.0961	114.64	64.5218	93.651	88.9045	106.051	114.767	118.906	64.1391	97.4192	85.4337	105.014	65.6917	113.054	112.016	134.821	122.384	139.638	93.6168	128.502	82.6213	96.0375	51.963
18	166.038	48.8131	149.252	52.7028	110.032	76.2344	85.82	83.1151	129.263	134.312	113.936	61.3855	97.2765	80.1606	117.239	72.3335	146.737	110.736	142.89	134.283	146.855	81.2562	109.772	85.3884	100.731	55.3475
19	163.784	56.5729	115.657	60.1319	91.7035	76.1768	100.056	73.3609	126.574	130.905	107.092	65.7626	90.6284	94.7006	113.584	60.8862	131.072	89.895	130.378	120.744	138.269	94.0942	107.976	96.2645	100.621	67.6966
20	182.08	49.8458	136.289	60.8537	109.161	90.9007	96.923	88.6666	139.983	126.392	104.103	75.219	99.0181	91.6237	121.13	64.7842	133.901	88.823	126.301	119.196	144.525	78.9128	109.389	103.797	115.664	54.3366
21	170.493	56.7122	122.447	73.641	111.448	86.5233	105.889	98.6867	147.149	111.066	118.871	83.6369	107.091	86.586	137.475	56.4643	140.087	84.058	128.787	109.771	123.547	78.135	102.272	90.112	110.925	50.5806
22	149.566	45.7295	120.723	72.1558	110.847	70.385	107.022	97.6769	132.196	88.43	110.716	58.5704	107.183	84.2573	121.948	62.8304	128.563	89.285	145.911	105.197	139.769	71.2942	119.38	86.1849	126.329	41.6718
23	139.049	42.6809	120.201	77.7336	110.217	93.2848	105.139	78.9065	152.91	94.9973	137.249	74.2243	101.645	74.0229	140.701	61.7445	126.661	106.703	153.776	106.944	129.864	76.8008	128.031	101.451	131.592	54.1669
24	137.084	41.6614	116.211	71.6062	114.322	92.9729	114.864	85.4725	146.919	83.4431	126.662	68.7376	94.3119	70.8314	139.252	58.9727	137.082	104.822	126.806	101.272	149.516	84.5137	136.736	93.3108	122.579	56.2468
25	147.643	44.311	131.364	70.709	120.544	81.055	114.213	82.8132	157.762	79.2615	114.565	80.026	95.4919	69.8503	131.753	85.9459	134.91	106.913	120.091	94.0725	134.89	78.2758	143.138	108.821	110.463	54.9659
26	167.766	36.7652	134.582	92.4159	115.273	77.7094	121.345	103.356	143.115	74.1594	116.64	89.2011	91.462	71.2234	130.612	86.0311	112.909	120.231	123.241	100.143	123.699	88.2627	153.19	103.621	122.309	60.4873
27	155.584	31.0587	118.562	75.2121	125.005	87.2061	114.523	101.438	122.242	84.8598	99.3235	87.173	96.4057	71.1312	128.085	82.2205	126.818	112.295	117.768	100.449	137.938	73.3694	144.023	118.738	126.79	55.9376
28	165.707	37.0747	107.918	70.4604	129.57	87.8986	119.302	95.8355	124.886	93.1334	117.824	90.0672	87.7758	62.6335	116.827	93.0909	147.175	104.032	104.802	92.3693	131.443	83.3706	123.083	126.329	126.678	56.0905
29	161.371	44.9528	132.237	73.7378	149.919	90.9736	129.725	97.6199	137.555	108.795	95.4813	83.4084	87.1809	61.6831	110.727	71.1759	128.519	102.993	115.935	88.5152	125.531	74.1713	143.508	130.783	146.271	48.5782
30	179.182	51.5452	146.991	75.4196	149.72	76.6549	147.196	93.6371	152.731	108.39	86.4036	65.2959	88.854	76.0488	124.481	75.2257	147.994	105.876	128.462	98.8904	130.998	89.1986	153.516	139.458	121.246	67.0903
31	222.121	60.7527	149.552	71.6617	161.106	88.8293	158.004	94.9197	138.5	132.902	94.9064	57.7031	100.601	79.417	123.675	88.8112	150.51	86.839	133.77	94.8839	144.355	86.9404	144.262	134.329	117.266	56.9879
32	206.037	48.3468	133.949	64.7371	135.284	96.4572	182.405	79.5041	128.616	136.933	97.7828	77.063	106.406	94.5906	118.506	94.1565	125.615	70.112	132.67	88.6464	135.842	91.7411	148.427	142.703	108.047	38.6507
33	169.527	61.6116	117.984	60.5213	113.884	78.7168	152.729	70.5409	146.37	129.221	80.1266	75.3803	113.435	115.892	115.686	72.9541	126.345	81.282	134.803	101.228	123.224	79.8686	143.09	147.495	104.123	34.5469
34	159.207	63.4013	145.176	67.2881	121.85	68.7986	128.308	55.1115	135.082	110.176	87.7641	79.2723	122.053	104.144	125.957	84.6595	127.761	80.937	137.989	115.251	114.352	78.2673	140.034	137.789	115.346	38.707
35	158.149	52.262	117.301	90.1713	121.791	80.4876	129.15	54.6823	118.36	97.4813	103.25	74.7167	125.628	94.5393	111.024	66.1199	114.202	104.99	128.91	117.143	125.982	80.162	149.401	139.545	113.774	40.8691
36	155.171	51.6652	113.802	78.6088	139.36	93.0663	122.247	45.6714	122.258	85.2552	103.816	77.3674	136.617	80.5592	110.059	55.9038	116.213	118.152	119.773	102.385	145.964	73.6964	147.047	132.673	122.821	41.8646
37	158.996	48.7589	117.976	65.4784	155.297	90.746	111.095	44.6868	113.463	92.5354	104.547	64.624	129.523	81.9753	102.629	78.2407	112.378	103.028	126.369	98.8821	138.576	94.9842	134.625	130.049	121.231	56.0383
38	173.351	61.3481	143.637	73.0551	164.711	90.4139	111.381	48.9036	114.841	102.727	94.6829	58.5142	135.87	93.2034	98.2764	91.7929	110.113	95.849	124.677	103.733	142.7	102.916	138.429	115.784	120.581	47.6637
39	149.978	68.4895	129.342	82.571	184.763	113.239	131.34	58.4961	121.668	106.582	105.844	49.4241	125.934	94.367	100.311	91.3402	127.917	88.097	131.619	88.2229	132.566	97.5776	140.945	112.924	95.9295	50.3215
40	168.011	81.0968	113.012	89.3084	149.152	118.659	123.753	55.1111	118.968	124.176	98.1518	68.1971	116.598	111.508	104.691	79.4127	111.492	87.071	126.429	103.551	130.036	97.3449	128.123	95.2742	95.6111	64.2172
41	172.572	82.3681	116.147	75.7669	135.78	102.055	117.512	49.3604	117.491	148.874	100.887	85.8061	131.665	112.339	97.792	86.782	110.496	82.288	141.215	126.569	131.431	97.3639	134.161	118.027	80.7843	73.9002
42	184.094	74.8012	135.903	79.6908	155.328	78.6954	118.047	50.2715	124.322	126.225	113.9	85.0823	146.47	105.889	102.322	84.2835	105.009	70.007	131.5	130.288	131.441	81.0262	132.627	108.104	84.1528	73.1729
43	196.849	75.2225	148.512	108.932	150.185	77.7213	126.438	70.2404	119.346	104.968	129.606	81.557	145.195	113.253	105.6	65.5116	106.742	92.95	130.243	117.602	122.564	73.4624	126.308	120.594	90.8825	85.1675
44	171.416	67.1744	129.717	108.555	143.571	79.9564	136.161	71.534	127.71	107.067	141.493	64.3179	152.136	99.1183	98.9438	63.6597	99.2686	113.506	157.003	116.634	143.149	86.03	128.095	110.594	74.247	81.6391
45	140.581	63.2395	134.877	100.315	164.461	74.7813	125.566	90.5542	127.149	103.74	147.572	62.9959	129.319	102.24	98.2582	72.9207	103.64	103.047	162.179	104.712	134.943	78.0366	134.369	105.103	80.7951	70.3483
46	157.703	59.3232	123.948	89.1638	153.398	66.8705	121.611	104.36	112.208	106.786	151.695	68.1883	128.698	105.584	90.3032	56.8261	104.06	102.395	144.518	108.399	120.939	76.7982	147.299	115.237	85.6576	77.473
47	134.463	63.138	117.568	76.61	138.962	82.3872	126.807	113.364	109.338	118.203	153.945	71.4273	124.196	109.664	110.817	66.5607	105.291	100.691	162.333	101.469	121.876	68.7836	131.247	112.774	94.4654	72.4478
48	131.279	73.7448	131.181	83.3037	141.176	81.347	122.029	96.8889	109.846	118.582	117.469	83.5722	134.695	123.829	107.322	55.9303	105.658	84.625	166.46	110.329	114.133	92.1078	138.573	112.115	92.0193	63.9051
49	147.174	85.8663	110.628	82.6856	121.183	80.656	112.976	86.9717	98.7944	106.981	124.25	67.8551	122.731	122.951	104.31	61.7108	106.208	112.591	155.198	111.204	112.864	94.0163	133.88	125.421	94.1251	63.0688
50	147.348	81.1867	103.947	77.1232	109.497	80.241	144.21	70.8139	100.368	87.7403	119.035	68.9797	118.222	147.293	117.113	57.8149	91.2536	137.539	149.832	124.023	122.729	60.242	126.11	138.013	92.6182	74.5391
Average	154.702	61.8715	131.324	72.9644	128.459	78.5741	115.292	76.0141	125.361	107.164	116.332	74.763	109.446	85.5819	114.542	70.7596	125.382	104.663	141.3	103.651	130.807	82.7567	134.575	111.105	105.665	55.773
SD	21.7336	13.8135	14.0783	15.2601	19.2504	14.8811	19.5072	17.733	14.3783	17.2431	18.0358	13.8607	17.6739	20.641	12.5455	12.1684	14.9775	17.923	17.0426	16.32	10.3691	11.842	13.8491	17.2191	16.5126	11.9422

## Sheet: 0.065 uM
0.065 uM Ca		Line witdh 7
	200213_101.nd2						200213_102.nd2						200213_103.nd2						200213_104.nd2				200213_105.nd2
Background	112.5	127.79	112.5	127.79	112.5	127.79	111.924	126.264	111.924	126.264	111.924	126.264	113.792	124.541	113.792	124.541	113.792	124.541	109.464	125.064	109.464	125.064	110.072	129.27	110.072	129.27
	mCherry	GCaMP	mCherry	GCaMP	mCherry	GCaMP	mCherry	GCaMP	mCherry	GCaMP	mCherry	GCaMP	mCherry	GCaMP	mCherry	GCaMP	mCherry	GCaMP	mCherry	GCaMP	mCherry	GCaMP	mCherry	GCaMP	mCherry	GCaMP
1	298.942	196.474	212.378	190.226	198.584	199.798	232.732	171.84	232.342	181.809	228.421	171.117	222.133	168.77	230.399	185.738	200.387	176.475	214	178.381	213.942	186.398	199.064	192.904	204.513	163.785
2	307.054	191.882	206.668	201.719	216.348	200.343	245.82	189.748	247.248	163.941	238.244	172.74	228.336	162.93	235.488	171.64	217.083	175.221	221.265	186.721	227.908	189.574	202.325	174.208	207.388	161.972
3	324.877	189.923	197.755	190.461	209.319	201.182	259.883	189.916	257.031	169.85	252.406	169.004	236.836	153.341	244.779	169.833	229.715	179.518	233.165	194.583	214.025	186.041	205.278	167.494	200.803	155.706
4	312.712	193.172	206.372	176.532	225.767	187.93	240.714	188.253	257.614	181.468	245.526	158.87	217.849	157.499	253.129	174.704	225.768	181.421	227.989	203.687	231.064	191.803	218.425	159.06	186.939	157.603
5	300.417	203.35	209.786	185.996	234.925	168.568	253.609	185.753	249.967	199.658	240.539	162.836	232.702	167.278	265.216	183.253	227.874	185.788	227.569	192.919	223.761	191.56	216.052	173.108	196.665	163.746
6	307.516	204.701	196.357	203.814	244.584	178.485	263.658	195.745	239.561	195.957	255.674	165.36	217.562	162.368	278.209	202.281	220.937	174.111	228.481	198.432	221.145	187.338	211.191	166.059	212.626	168.018
7	286.095	197.415	192.355	172.255	236.065	178.897	265.764	184.701	220.961	179.733	219.018	172.059	229.831	168.209	259.082	176.021	221.628	167.709	233.879	191.732	214.901	182.754	207.326	159.231	219.672	162.942
8	280.975	178.599	197.195	161.955	235.735	174.169	256.835	184.449	222.536	176.362	210.589	183.71	223.195	162.018	263.055	164.043	235.221	181.867	245.718	198.458	216.062	177.637	213.395	156.164	223.115	159.648
9	298.563	186.552	184.424	166.345	239.779	197.346	282.751	177.124	253.729	181.639	209.968	179.332	191.891	157.431	250.366	175.866	256.032	180.493	273.84	199.413	216.031	163.767	214.047	163.247	214.84	163.768
10	305.083	201.726	183.094	176.386	225.149	202.486	270.446	196.687	240.698	189.826	201.16	171.393	186.099	156.053	235.971	161.556	265.01	179.413	274.065	196.579	207.516	170.787	201.512	166.48	201.505	158.053
11	323.954	185.414	181.65	171.268	237.969	197.369	240.87	192.251	248.104	192.474	199.52	176.348	194.449	161.911	238.917	161.585	258.575	187.367	301.139	194.304	226.185	174.357	200.25	154.792	196.908	161.733
12	284.563	188.153	190.541	175.518	250.814	197.865	251.928	180.392	272.636	181.357	199.723	178.702	189.024	153.361	258.339	166.376	254.261	193.194	284.374	188.366	207.601	183.475	195.76	170.222	201.558	161.907
13	292.771	190.27	195.256	182.561	246.975	211.361	258.747	195.298	257.927	174.589	199.247	169.293	195.197	157.185	256.784	164.372	254.568	174.808	294.992	184.028	216.006	191.612	194.755	172.697	203.872	163.558
14	289.789	182.165	203.484	190.963	242.602	207.545	245.552	208.782	258.515	172.241	202.64	179.446	199.06	162.712	252.711	156.652	269.108	174.761	267.796	194.589	228.735	175.635	192.38	178.896	200.089	159.519
15	283.821	171.589	184.316	190.856	230.223	201.85	256.041	213.95	253.651	192.253	205.906	181.421	195.062	152.467	270.782	166.92	232.321	182.891	265.047	199.32	230.73	179.755	198.692	177.89	195.947	166.847
16	271.731	178.824	180.686	190.869	253.205	193.382	260.514	222.779	227.47	185.526	205.41	164.03	209.044	150.26	247.904	180.34	239.529	193.206	281.683	200.301	225.359	184.241	196.333	186.994	211.476	162.217
17	298.044	191.353	188.721	183.547	251.857	197.612	266.828	207.632	237.672	173.11	203.808	176.468	200.271	155.832	249.24	170.083	251.368	187.137	290.382	192.059	231.162	187.007	208.519	168.116	197.884	162.643
18	276.511	183.422	195.735	183.332	240.786	210.637	286.022	197.424	248.363	187.964	209.208	173.979	183.306	165.691	251.984	175.458	248.347	186.523	271.925	185.059	228.344	176.001	206.441	167.173	204.348	162.162
19	287.206	185.856	188.688	163.119	211.404	215.72	281.543	196.744	252.251	169.208	214.123	187.789	199.121	157.022	260.981	170.064	242.399	195.905	275.723	182.078	211.992	173.154	206.489	167.518	201.659	170.661
20	320.75	194.568	193.015	158.649	216.241	244.375	252.62	196.826	258.357	179.563	208.476	184.064	200.149	157.747	265.44	176.247	258.416	209.637	267.956	179.882	233.305	202.778	201.726	174.82	190.197	161.225
21	322.491	200.235	196.609	158.377	205.958	259.433	252.809	172.768	268.011	176.711	215.691	175.017	197.303	161.482	267.18	170.451	254.728	211.891	253.647	181.035	223.244	206.013	202.9	166.86	202.586	162.716
22	317.449	206.207	190.097	147.584	229.122	225.225	247.723	173.046	260.527	176.549	215.359	164.966	193.24	164.913	259.118	178.634	240.182	206.468	282.309	185.84	225.921	206.388	213.292	158.32	192.336	181.22
23	316.741	218.176	183.438	152.167	235.3	214.162	256.931	176.777	251.074	176.019	215.187	179.43	189.979	166.375	242.881	197.142	230.568	193.546	299.394	191.307	218.409	187.823	212.144	169.544	198.602	186.293
24	323.993	210.006	177.085	150.401	229.924	196.151	253.508	185.413	251.724	180.496	220.035	165.261	204.89	163.449	239.851	196.489	224.426	174.028	274.403	180.252	220.671	179.627	218.98	169.951	228.393	182.77
25	316.984	212.194	199.14	152.082	226.963	195.156	277.139	190.996	256.593	164.559	220.628	179.607	201.401	159.273	229.882	192.676	216.024	171.647	290.728	184.971	223.007	189.84	227.356	169.941	236.418	169.214
26	313.704	193.717	202.677	165.705	238.436	194.049	274.294	201.41	247.726	174.064	234.494	172.227	197.161	163.858	239.928	180.846	213.529	175.504	289.1	173.392	217.608	201.407	220.491	182.528	229.044	171.597
27	296.375	189.286	187.985	160.587	233.383	188.625	284.927	188.845	244.47	171.077	251.423	170.743	194.741	164.94	246.315	181.132	235.535	174.332	275.02	185.373	225.011	204.649	222.641	180.633	240.651	174.482
28	293.793	203.121	188.757	179.824	229.428	194.128	280.613	197.316	241.633	178.26	241.846	173.677	193.046	179.32	254.802	161.103	234.375	185.874	295.044	189.416	215.71	195.363	220.91	186.381	235.236	172.602
29	297.136	191.699	185.984	194.668	238.091	202.974	289.338	208.535	230.145	172.094	234.573	182.543	206.865	172.925	273.702	177.407	228.256	193.433	288.445	200.959	203.385	190.221	218.81	182.998	234.658	165.738
30	274.703	208.564	200.5	204.666	240.377	201.825	287.243	198.805	223.894	185.149	240.084	165.458	202.624	161.44	285.035	176.228	232.289	184.068	315.179	182.998	236.563	195.224	223.298	189.98	234.387	165.619
31	284.161	204.007	208.023	197.57	234.093	194.406	272.114	187.239	230.429	183.981	238.403	160.976	219.777	159.092	275.774	180.331	251.303	170.463	316.101	180.43	231.703	167.297	222.299	189.921	227.23	159.273
32	296.112	205.43	204.907	181.618	248.868	180.372	269.841	180.922	233.959	184.387	232.477	165.55	227.903	163.177	280.429	195.729	239.169	166.886	329.319	175.785	235.625	186.785	220.392	187.908	217.59	162.297
33	309.16	191.17	199.762	174.205	236.362	173.175	262.12	181.574	247.801	180.51	192.098	172.334	220.369	168.295	269.258	198.949	242.679	171.87	316.326	167.63	239.249	182.964	219.212	167.359	217.635	171.304
34	266.776	193.961	208.41	168.015	238.233	178.395	282.654	183.607	247.074	180.378	215.069	187.904	212.905	164.847	274.65	186.345	233.696	179.658	312.087	166.508	249.143	177.275	213.753	172.826	226.218	157.513
35	279.323	200.069	197.456	178.051	252.644	184.493	267.089	170.664	261.267	185.87	210.9	179.727	225.199	163.924	277.178	191.188	255.844	182.118	312.664	174.067	257.353	198.164	223.172	162.297	211.101	160.273
36	260.539	196.407	217.337	203.705	244.834	180.336	278.341	170.66	246.09	201.05	221.353	184.284	217.266	168.11	268.183	198.634	242.982	189.609	290.722	167.698	235.033	205.508	212.277	169.353	218.943	153.156
37	275.461	209.85	218.084	190.641	246.373	180.275	255.244	187.488	227.332	187.639	222.374	181.016	195.742	177.136	284.535	196.552	233.151	173.041	308.272	178.516	226.027	230.377	219.886	162.906	206.62	163.105
38	285.203	201.137	235.412	203.471	221.946	197.101	255.27	196.422	233.329	172.779	232.698	177.678	217.122	164.737	287.662	191.732	230.798	168.669	340.459	172.685	242.308	225.405	221.814	165.11	222.403	169.433
39	294.61	222.155	219.081	212.573	226.564	197.89	276.639	184.253	233.447	171.445	240.018	178.056	224.765	158.881	277.541	186.51	236.31	169.91	310.934	169.944	232.203	218.209	210.499	163.376	240.748	167.56
40	293.065	198.148	218.767	206.557	239.144	192.674	264.34	182.674	225.615	184.065	220.185	172.646	219.382	160.489	275.459	180.438	247.157	181.123	326.979	174.945	232.543	196.519	222.038	172.273	254.257	166.059
41	268.246	196.986	219.387	193.427	225.502	179.098	267.536	184.076	233.428	191.904	210.934	161.479	214.261	161.099	281.019	171.326	242.874	166.423	339.928	176.155	209.449	180.689	217.848	184.408	277.171	155.877
42	255.298	195.28	214.35	183.849	211.19	183.427	257.595	174.442	229.776	181.148	220.037	165.201	207.979	162.159	295.661	179.222	209.653	185.667	336.63	161.432	207.998	188.111	216.582	192.909	269.569	151.64
43	257.601	188.943	221.454	187.654	209.702	168.777	283.62	176.836	234.594	172.126	216.114	187.666	216.902	181.304	291.08	193.236	205.382	184.642	306.935	164.417	219.083	194.499	217.332	187.189	259.199	143.959
44	235.047	187.836	221.686	170.873	231.635	167.275	278.772	181.252	223.912	174.207	220.089	194.226	210.459	190.532	287.276	191.37	215.606	178	298.809	172.939	212.281	215.963	216.605	181.903	240.257	138.978
45	239.631	195.807	214.445	159.681	230.787	190.912	275.232	178.641	220.497	172.055	210.082	178.189	207.932	209.172	286.901	197.692	238.211	167.428	320.57	177.864	240.535	183.728	223.566	178.098	237.847	146.499
46	255.187	185.572	212.795	160.566	228.5	186.06	252.304	182.327	225.179	159.018	203.553	171.786	199.466	215.615	274.628	192.169	226.957	167.487	297.59	172.861	249.84	194.065	249.21	166.758	229.197	144.168
47	255.461	187.088	201.661	165.392	217.121	188.98	246.426	187.724	227.601	171.795	208.448	167.371	199.44	220.768	263.989	176.14	240.839	171.574	269.039	170.308	230.226	190.905	237.699	157.712	226.452	145.649
48	253.795	180.179	204.43	166.047	195.126	204.71	249.23	186.581	243.272	170.773	226.607	165.921	238.01	198.143	256.295	165.569	230.349	163.123	269.258	164.53	236.899	206.127	219.575	165.952	237.594	144.172
49	251.35	182.219	224.185	181.696	238.416	195.091	250.114	180.454	237.286	167.967	212.99	168.306	232.44	176.791	262.802	164.074	239.027	166.951	271.235	153.852	230.886	198.814	233.7	181.636	236.861	142.369
50	267.581	183.408	234.896	173.64	235.082	188.277	268.223	180.447	219.987	177.18	213.629	158.458	229.848	172.312	268.812	182.036	256.495	169.269	277.611	160.913	226.071	210.238	228.869	196.709	233.683	148.594
Average	288.167	194.685	201.946	178.833	231.349	195.007	263.802	188.17	241.886	179.076	220.14	173.713	209.391	167.693	262.932	179.688	236.739	180.243	283.915	181.998	225.595	191.277	214.342	173.216	219.898	161.437
SD	23.4916	10.5604	14.2982	16.5729	13.8135	17.3213	14.1689	11.4783	13.674	9.00901	15.5844	8.32474	14.7082	15.1554	16.9981	12.1019	15.5201	11.1961	31.9505	12.2318	11.6734	14.2157	11.4607	10.7681	20.6406	10.1599
Background subtraction
1	186.442	68.6842	99.8778	62.436	86.0841	72.0076	120.808	45.5764	120.418	55.5445	116.497	44.8526	108.341	44.2294	116.607	61.1965	86.5947	51.9335	104.536	53.3168	104.478	61.3339	88.9921	63.6335	94.441	34.515
2	194.554	64.0918	94.1676	73.9285	103.848	72.5528	133.895	63.484	135.323	37.6766	126.32	46.4765	114.544	38.3895	121.696	47.099	103.291	50.68	111.801	61.6569	118.444	64.5103	92.2527	44.9378	97.316	32.702
3	212.377	62.1334	85.2554	62.6707	96.8188	73.392	147.959	63.6522	145.107	43.5859	140.482	42.7398	123.044	28.7998	130.987	45.2921	115.923	54.9767	123.701	69.5192	104.561	60.9765	95.206	38.2244	90.731	26.4359
4	200.212	65.3816	93.8724	48.7422	113.267	60.1402	128.79	61.9889	145.69	55.2042	133.602	32.6056	104.057	32.9575	139.337	50.1631	111.976	56.8801	118.525	78.6226	121.6	66.7391	108.353	29.79	76.867	28.333
5	187.917	75.5602	97.2857	58.2061	122.425	40.7778	141.685	59.4888	138.043	73.3937	128.615	36.5722	118.91	42.7368	151.424	58.712	114.082	61.2468	118.105	67.8555	114.297	66.4962	105.98	43.8378	86.593	34.4758
6	195.016	76.9109	83.8567	76.0244	132.084	50.695	151.734	69.4807	127.637	69.6931	143.75	39.0957	103.77	37.8274	164.417	77.7397	107.145	49.5696	119.017	73.3684	111.681	62.2736	101.119	36.7886	102.554	38.7481
7	173.595	69.6245	79.8546	44.4649	123.565	51.1069	153.84	58.4371	109.037	53.4686	107.094	45.7953	116.039	43.668	145.29	51.4804	107.836	43.1677	124.415	66.6679	105.437	57.6899	97.2539	29.9613	109.6	33.6719
8	168.475	50.8092	84.6952	34.1651	123.235	46.379	144.911	58.1853	110.612	50.0981	98.6652	57.4462	109.403	37.4773	149.263	39.5021	121.429	57.3261	136.254	73.3935	106.598	52.5728	103.323	26.8941	113.043	30.3777
9	186.063	58.7622	71.9236	38.555	127.279	69.5563	170.827	50.8596	141.805	55.3752	98.0442	53.0682	78.099	32.8896	136.574	51.3248	142.24	55.9519	164.376	74.349	106.567	38.7032	103.975	33.977	104.768	34.4977
10	192.583	73.936	70.5944	48.5956	112.649	74.6963	158.522	70.4231	128.774	63.5618	89.2362	45.1294	72.307	31.5121	122.179	37.0147	151.218	54.8725	164.601	71.5147	98.0523	45.723	91.4403	37.2095	91.433	28.7828
11	211.454	57.6237	69.1496	43.4777	125.469	69.5794	128.946	65.9875	136.18	66.21	87.596	50.0837	80.657	37.3698	125.125	37.0443	144.783	62.8258	191.675	69.2398	116.721	49.2935	90.1779	25.5219	86.836	32.4631
12	172.063	60.3631	78.041	47.728	138.314	70.075	140.004	54.1276	160.712	55.0934	87.7986	52.4377	75.232	28.82	144.547	41.835	140.469	68.6527	174.91	63.3016	98.1372	58.4105	85.688	40.9521	91.486	32.637
13	180.271	62.4805	82.7564	54.771	134.475	83.5708	146.823	69.034	146.003	48.3249	87.3231	43.0292	81.405	32.6437	142.992	39.8313	140.776	50.267	185.528	58.9641	106.542	66.5475	84.6831	43.4275	93.8	34.2876
14	177.289	54.3752	90.9843	63.1728	130.102	79.7547	133.628	82.518	146.591	45.9774	90.716	53.1816	85.268	38.1713	138.919	32.1113	155.316	50.2204	158.332	69.5248	119.271	50.5714	82.3076	49.6264	90.017	30.2491
15	171.321	43.7985	71.816	63.0664	117.723	74.0604	144.117	87.6855	141.727	65.989	93.9823	55.1568	81.27	27.9261	156.99	42.3793	118.529	58.3503	155.583	74.2555	121.266	54.6907	88.6205	48.6204	85.875	37.5767
16	159.231	51.034	68.1859	63.0787	140.705	65.5924	148.59	96.5154	115.546	59.2618	93.4857	37.7665	95.252	25.7186	134.112	55.7992	125.737	68.6651	172.219	75.2371	115.895	59.1769	86.2607	57.7245	101.404	32.9468
17	185.544	63.5633	76.2212	55.7571	139.357	69.8222	154.904	81.3683	125.748	46.8456	91.8839	50.204	86.479	31.2911	135.448	45.5418	137.576	62.5959	180.918	66.9952	121.698	61.943	98.4475	38.846	87.812	33.3734
18	164.011	55.632	83.2351	55.5419	128.286	82.8466	174.098	71.1603	136.439	61.6999	97.284	47.7151	69.514	41.15	138.192	50.9173	134.555	61.9824	162.461	59.9945	118.88	50.9366	96.3692	37.9032	94.276	32.892
19	174.706	58.0655	76.1884	35.329	98.9044	87.9295	169.619	70.48	140.327	42.9443	102.199	61.5252	85.329	32.4806	147.189	45.5225	128.607	71.3639	166.259	57.0142	102.528	48.0901	96.4175	38.2479	91.587	41.3909
20	208.25	66.7777	80.5148	30.8586	103.741	116.585	140.696	70.562	146.433	53.2989	96.5517	57.8002	86.357	33.2059	151.648	51.706	144.624	85.0957	158.492	54.8183	123.841	77.7136	91.6539	45.5497	80.125	31.9552
21	209.991	72.4449	84.1092	30.5869	93.4585	131.643	140.885	46.5042	156.087	50.4472	103.767	48.7525	83.511	36.9414	153.388	45.9095	140.936	87.3504	144.183	55.9711	113.78	80.9489	92.8276	37.5902	92.514	33.4465
22	204.949	78.4165	77.5973	19.7941	116.622	97.4346	135.799	46.7824	148.603	50.2849	103.435	38.7024	79.448	40.3716	145.326	54.0933	126.39	81.9268	172.845	60.7758	116.457	81.3245	103.22	29.0498	82.264	51.9498
23	204.241	90.3864	70.9377	24.3773	122.8	86.3725	145.007	50.5128	139.15	49.7554	103.263	53.1661	76.187	41.834	129.089	72.6014	116.776	69.0046	189.93	66.2427	108.945	62.759	102.072	40.2743	88.53	57.023
24	211.493	82.2163	64.5855	22.6111	117.424	68.3614	141.584	59.1492	139.8	54.2325	108.111	38.997	91.098	38.9079	126.059	71.9481	110.634	49.4865	164.939	55.1877	111.207	54.5629	108.908	40.681	118.321	53.4999
25	204.484	84.4037	86.6404	24.2915	114.463	67.3664	165.215	64.7319	144.669	38.2947	108.704	53.3427	87.609	34.7323	116.09	68.1353	102.232	47.1058	181.264	59.9073	113.543	64.7762	117.284	40.6708	126.346	39.9436
26	201.204	65.9267	90.1768	37.9147	125.936	66.259	162.37	75.1459	135.802	47.7997	122.57	45.963	83.369	39.3172	126.136	56.3055	99.737	50.9625	179.636	48.3283	108.144	76.3433	110.419	53.258	118.972	42.3272
27	183.875	61.4958	75.4854	32.7967	120.883	60.8345	173.003	62.5811	132.546	44.8129	139.499	44.4788	80.949	40.399	132.523	56.5907	121.743	49.7913	165.556	60.3086	115.547	79.5853	112.569	51.3626	130.579	45.2123
28	181.293	75.3314	76.2566	52.0337	116.928	66.3379	168.689	71.0519	129.709	51.9959	129.922	47.413	79.254	54.7791	141.01	36.5625	120.583	61.333	185.58	64.3521	106.246	70.2989	110.838	57.1105	125.164	43.332
29	184.636	63.9086	73.4841	66.8777	125.591	75.1836	177.414	82.2707	118.221	45.8302	122.649	56.2794	93.073	48.384	159.91	52.8665	114.464	68.892	178.981	75.8955	93.921	65.1568	108.738	53.7284	124.586	36.4682
30	162.203	80.7741	87.9996	76.8759	127.877	74.0354	175.319	72.5408	111.97	58.8854	128.16	39.1941	88.832	36.8986	171.243	51.6866	118.497	59.5267	205.715	57.9337	127.099	70.1597	113.226	60.7095	124.315	36.3493
31	171.661	76.2167	95.5232	69.78	121.593	66.6158	160.19	60.9747	118.505	57.7169	126.479	34.7121	105.985	34.551	161.982	55.7899	137.511	45.922	206.637	55.3656	122.239	42.2326	112.227	60.6509	117.158	30.0029
32	183.612	77.6404	92.4073	53.8275	136.368	52.582	157.917	54.6578	122.035	58.1235	120.553	39.2862	114.111	38.6364	166.637	71.1877	125.377	42.3445	219.855	50.7212	126.161	61.7207	110.32	58.6378	107.518	33.0269
33	196.66	63.3798	87.2623	46.4147	123.862	45.385	150.196	55.3102	135.877	54.2462	80.1742	46.0697	106.577	43.7537	155.466	74.4077	128.887	47.3292	206.862	42.5663	129.785	57.9004	109.14	38.0895	107.563	42.0344
34	154.276	66.1713	95.9101	40.2251	125.733	50.6047	170.73	57.3435	135.15	54.114	103.145	61.6396	99.113	40.3065	160.858	61.804	119.904	55.1173	202.623	41.4445	139.679	52.2113	103.681	43.5558	116.146	28.2429
35	166.823	72.2786	84.9563	50.2614	140.144	56.7027	155.165	44.4001	149.343	59.606	98.9761	53.463	111.407	39.3828	163.386	66.6473	142.052	57.5768	203.2	49.0034	147.889	73.1001	113.1	33.0271	101.029	31.0032
36	148.039	68.6167	104.837	75.9148	132.334	52.5463	166.417	44.3956	134.166	74.7858	109.429	58.0201	103.474	43.5694	154.391	74.0932	129.19	65.0678	181.258	42.6336	125.569	80.4444	102.205	40.0835	108.871	23.8864
37	162.961	82.0604	105.584	62.8507	133.873	52.4851	143.32	61.2235	115.408	61.3753	110.45	54.7522	81.95	52.5948	170.743	72.0106	119.359	48.5	198.808	53.4517	116.563	105.313	109.814	33.6364	96.548	33.8348
38	172.703	73.3471	122.912	75.681	109.446	69.3113	143.346	70.1581	121.405	46.5148	120.774	51.4139	103.33	40.1956	173.87	67.1909	117.006	44.1276	230.995	47.6212	132.844	100.341	111.742	35.8404	112.331	40.1626
39	182.11	94.365	106.581	84.7827	114.064	70.1001	164.715	57.9894	121.523	45.1811	128.094	51.792	110.973	34.3398	163.749	61.969	122.518	45.369	201.47	44.88	122.739	93.1447	100.427	34.1064	130.676	38.2899
40	180.565	70.3576	106.267	78.7671	126.644	64.8837	152.416	56.4102	113.691	57.8005	108.261	46.382	105.59	35.9479	161.667	55.8969	133.365	56.582	217.515	49.8811	123.079	71.4551	111.966	43.0028	144.185	36.7893
41	155.746	69.1961	106.887	65.6374	113.002	51.3084	155.612	57.8124	121.504	65.6395	99.0103	35.2153	100.469	36.5581	167.227	46.7851	129.082	41.8819	230.464	51.0914	99.985	55.6253	107.776	55.138	167.099	26.6068
42	142.798	67.4903	101.85	56.0585	98.6903	55.6369	145.671	48.1783	117.852	54.8844	108.113	38.9373	94.187	37.6175	181.869	54.6815	95.861	61.1259	227.166	36.3679	98.5344	63.0474	106.51	63.6393	159.497	22.3702
43	145.101	61.1531	108.954	59.8635	97.2015	40.9872	171.696	50.5721	122.67	45.8624	104.19	61.4023	103.11	56.7631	177.288	68.6947	91.5902	60.1011	197.471	39.3534	109.619	69.4353	107.26	57.9191	149.127	14.6891
44	122.547	60.0456	109.186	43.0832	119.135	39.4851	166.848	54.988	111.988	47.9429	108.165	67.9617	96.667	65.9906	173.484	66.8294	101.814	53.4593	189.345	47.8753	102.817	90.8986	106.533	52.6326	130.185	9.7083
45	127.131	68.0167	101.945	31.891	118.287	63.1222	163.308	52.3766	108.573	45.791	98.1575	51.9253	94.14	84.6305	173.109	73.151	124.419	42.8872	211.106	52.8001	131.071	58.6642	113.494	48.8279	127.775	17.2288
46	142.687	57.7817	100.295	32.7762	116	58.2695	140.38	56.063	113.255	32.7538	91.6285	45.5215	85.674	91.0742	160.836	67.6277	113.165	42.9461	188.126	47.7968	140.376	69.0005	139.138	37.4884	119.125	14.8977
47	142.961	59.2975	89.1607	37.6019	104.621	61.1895	134.502	61.4603	115.677	45.5307	96.5238	41.1075	85.648	96.2265	150.197	51.5992	127.047	47.0327	159.575	45.2438	120.762	65.8405	127.627	28.4415	116.38	16.3794
48	141.295	52.3886	91.9297	38.2572	82.6261	76.9201	137.306	60.3167	131.348	44.5092	114.683	39.6569	124.218	73.6018	142.503	41.0277	116.557	38.5821	159.794	39.4661	127.435	81.0633	109.503	36.6821	127.522	14.9017
49	138.85	54.429	111.685	53.9058	125.916	67.3009	138.19	54.1903	125.362	41.7027	101.066	42.0419	118.648	52.2503	149.01	39.5328	125.235	42.4099	161.771	28.7876	121.422	73.7497	123.628	52.3664	126.789	13.0987
50	155.081	55.6179	122.396	45.8498	122.582	60.4874	156.299	54.183	108.063	50.9157	101.705	32.1943	116.056	47.7711	155.02	57.4945	142.703	44.7283	168.147	35.8491	116.607	85.1743	118.797	67.4392	123.611	19.3236
Average	175.667	66.8952	89.4455	51.0432	118.849	67.2174	151.878	61.9058	129.962	52.8116	108.216	47.4493	95.5987	43.1518	149.14	55.1467	122.947	55.7019	174.451	56.9343	116.131	66.2134	104.27	43.9463	109.826	32.1668
SD	23.4916	10.5604	14.2982	16.5729	13.8135	17.3213	14.1689	11.4783	13.674	9.00901	15.5844	8.32474	14.7082	15.1554	16.9981	12.1019	15.5201	11.1961	31.9505	12.2318	11.6734	14.2157	11.4607	10.7681	20.6406	10.1599

## Sheet: 0.038 uM
0.038 uM Ca		Line witdh 7
	200213_106.nd2				200213_107.nd2								200213_108.nd2								200213_109.nd2
Background	109.646	126.047	109.646	126.047	107.36	127.645	107.36	127.645	107.36	127.645	107.36	127.645	106.551	131.75	106.551	131.75	106.551	131.75	106.551	131.75	109.72	124.643	109.72	124.643	109.72	124.643
	mCherry	GCaMP	mCherry	GCaMP	mCherry	GCaMP	mCherry	GCaMP	mCherry	GCaMP	mCherry	GCaMP	mCherry	GCaMP	mCherry	GCaMP	mCherry	GCaMP	mCherry	GCaMP	mCherry	GCaMP	mCherry	GCaMP	mCherry	GCaMP
1	251.515	181.076	251.928	181.097	233.84	189.761	226.074	176.703	228.989	163.559	210.77	156.523	194.867	156.511	164.214	154.651	212.78	156.266	224.788	172.055	266.932	175.015	266.704	182.195	206.994	154.745
2	266.415	188.791	253.408	168.114	252.647	179.332	232.826	178.953	222.191	170.978	220.931	147.726	202.836	160.874	172.952	166.682	231.228	156.736	229.452	178.986	278.997	166.751	275.845	182.863	222.228	174.737
3	274.91	191.397	260.187	171.015	270.729	181.272	244.499	166.584	234.413	175.367	224.7	166.886	195.592	165.26	172.582	160.285	233.945	166.752	229.363	173.946	273.978	166.519	286.875	179.966	215.137	174.922
4	272.581	186.011	260.996	172.326	270.907	169.815	282.7	160.522	248.062	166.671	227.11	166.058	221.929	180.088	175.696	161.588	239.03	165.004	215.461	168.757	277.682	176.782	273.654	180.585	219.487	178.626
5	277.48	171.297	243.331	166.133	300.258	183.407	282.899	171.301	240.28	168.272	217.999	165.164	223.554	188.096	180.954	164.013	224.549	166.719	210.125	172.572	293.223	165.663	269.091	188.702	220.394	178.27
6	274.66	164.408	261.807	156.645	301.176	185.481	239.286	175.779	229.49	167.472	208.798	155.254	216.258	173.595	170.803	166.765	238.191	166.373	228.737	176.977	309.822	163.256	268.678	174.867	214.373	181.81
7	269.894	186.196	245.873	167.929	280.291	174.305	248.026	177.334	231.939	169.302	220.928	159.776	216.355	166.079	179.752	175.387	232.882	168.513	224.59	173.135	298.319	168.147	274.152	159.767	233.786	170.652
8	265.307	173.718	220.957	157.607	294.233	171.188	262.39	182.036	233.892	165.377	230.006	166.767	223.379	166.74	177.223	164.219	219.498	182.642	228.225	173.024	272.414	174.688	271.272	177.241	255.735	171.034
9	247.088	168.115	233.951	170.885	295.779	182.61	270.85	181.61	239.779	161.625	226.101	163.873	209.709	174.335	183.416	158.491	227.305	189.501	217.025	175.998	286.459	176.862	264.012	174.631	243.939	166.054
10	257.512	165.311	226.851	164.982	316.654	176.939	258.63	172.543	238.049	162.478	245.117	173.105	202.263	172.542	196.633	145.894	213.836	168.059	217.962	167.498	273.072	177.756	271.764	174.229	218.906	168.012
11	275.795	180.594	223.962	170.877	302.178	169.661	267.769	168.344	250.599	159.17	241.163	155.351	227.682	181.31	201.614	163.169	224.977	171.806	229.531	160.265	274.109	182.82	267.853	182.918	223.553	172.492
12	296.06	173.315	218.897	169.949	302.887	180.57	262.846	165.306	258.478	172.945	214.416	169.322	222.948	183.924	205.445	170.846	207.79	171.049	236.101	160.666	265.572	187.12	260.205	177.42	231.769	176.656
13	285.005	179.316	207.511	160.947	305.209	183.259	273.287	177.35	248.648	167.628	221.559	170.81	220.028	195.742	201.161	172.032	205.784	165.046	227.948	173.337	274.024	190.414	275.949	163.76	223.939	171.983
14	290.886	181.07	205.142	168.062	308.383	181.268	278.06	179.374	245.785	162.607	218.433	166.274	225.278	184.992	198.554	175.074	225.042	165.369	223.681	164.624	283.035	167.761	288.529	175.502	229.432	173.165
15	301.67	180.6	201.158	181.158	318.98	189.737	292.465	179.074	258.456	168.417	203.819	161.985	247.747	184.221	195.441	174.726	240.906	163.297	199.159	154.75	313.232	175.46	250.165	175.363	230.773	168.612
16	255.475	173.123	200.788	176.079	306.461	202.12	281.901	181.135	266.885	171.946	214.581	167.444	229.831	185.221	196.625	155.452	225.54	163.274	207.999	165.99	305.405	178.386	267.364	189.113	231.834	164.23
17	247.828	185.232	207.572	164.014	314.816	196.562	285.373	184.812	254.634	177.1	225.49	160.011	234.008	187.778	199.554	162.809	205.382	154.389	211.444	162.542	297.973	175.817	285.101	175.611	230.808	165.774
18	244.727	184.383	212.583	164.364	324.586	190.492	282.36	181.075	221.249	172.273	212.291	150.113	219.537	184.784	203.736	163.576	199.616	160.487	215.225	161.24	284.495	178.337	285.246	179.897	225.248	163.584
19	247.142	188.819	221.107	162.701	319.904	179.779	260.431	189.771	248.457	165.555	208.055	165.942	221.726	169.229	208.977	152.283	211.82	168.793	234.329	162.617	274.514	171.618	288.813	188.619	214.739	164.12
20	245.931	184.071	210.906	154.684	292.456	185.387	268.083	196.708	256.459	159.356	197.688	154.41	243.883	181.037	196.952	156.538	227.144	167.889	238.993	167.399	271.181	180.638	292.833	183.359	223.168	156.118
21	255.737	163.039	212.768	152.473	285.217	194.854	282.633	181.366	270.86	162.234	202.817	162.798	237.756	191.515	205.354	154.808	229.541	160.965	217.861	171.669	276.762	186.702	286.995	200.196	230.112	163.674
22	251.006	166.272	215.208	158.408	273.733	192.875	267.682	169.187	266.939	169.832	207.449	151.501	237.451	190.248	197.246	149.555	231.875	166.494	216.049	164.186	273.718	182.76	302.166	193.363	231.144	162.307
23	261.825	165.506	215.715	166.144	305.088	190.972	274.356	165.179	281.204	180.531	189.55	151.692	243.871	187.374	179.867	146.192	242.548	169.923	211.012	163.783	289.606	178.671	284.712	187.691	223.695	157.34
24	270.936	168.94	230.471	172.616	296.742	171.181	266.137	163.055	267.128	164.447	193.945	154.635	241.856	186.385	177.096	149.574	238.413	179.237	216.259	165.628	287.603	179.364	263.656	175.95	229.507	178.948
25	299.866	181.03	239.756	167.309	271.591	175.083	265.579	152.959	254.84	163.665	188.517	157.344	221.114	218.663	189.54	152.707	238.901	181.074	214.846	168.535	323.046	174.059	261.032	176.18	216.711	178.834
26	274.833	168.173	230.788	160.875	262.716	168.151	270.837	159.661	263.302	165.128	189.618	150.072	227.065	213.761	184.122	158.038	254.828	178.514	211.704	167.495	309.84	174.316	261.623	179.883	221.79	162.011
27	277.255	156.033	223.202	162.102	267.529	178.749	270.381	161.032	260.245	161.972	196.811	157.679	229.531	204.564	168.234	157.22	257.565	164.88	225.045	164.172	292.499	189.385	257.991	164.839	218.865	165.274
28	271.952	176.125	229.1	162.651	263.907	172.82	258.845	162.144	271.157	155.921	191.612	141.836	220.273	192.628	176.266	153.524	242.814	172.177	213.321	173.359	276.874	177.121	268.902	157.239	215.627	165.375
29	258.386	169.439	225.511	160.521	267.896	176.46	244.974	159.24	252.245	167.16	189.625	145.862	238.214	180.47	180.411	137.918	227.875	168.384	212.787	164.988	260.073	177.886	266.46	166.585	215.344	163.995
30	253.521	169.701	228.018	165.722	261.682	189.76	249.153	163.967	263.388	164.851	195.129	147.263	232.852	199.355	180.222	146.74	214.147	177.452	200.011	182.322	258.94	181.055	242.938	171.832	223.895	163.143
31	255.137	160.293	226.242	157.861	271.277	178.704	234.144	157.834	245.935	157.858	188.141	150.778	230.503	188.561	194.44	135.76	217.802	183.43	205.244	170.821	254.532	194.773	226.464	168.128	211.193	187.389
32	251.261	171.781	234.869	161.039	274.09	175.778	226.886	157.754	236.936	155.298	196.663	160.16	248.867	187.306	184.51	134.006	219.301	168.59	219.857	170.745	268.267	190.809	220.531	165.37	228.171	179.786
33	250.896	173.829	215.254	163.834	259.957	175.334	220.76	165.107	236.951	157.176	195.666	147.637	265.266	196.058	173.571	136.615	222.121	172.935	217.299	154.209	295.715	183.635	234.41	150.645	221.905	175.175
34	253.107	174.942	209.938	158.028	283.768	171.201	229.91	166.125	251.013	159.102	201.372	157.729	262.095	194.967	162.893	152.673	215.101	165.794	225.804	166.73	295.971	188.255	237.06	156.075	237.415	163.97
35	240.213	174.261	214.668	157.93	285.327	177.317	239.727	162.562	253.39	162.249	193.397	155.817	268.572	198.231	168.366	145.747	212.008	166.517	229.444	170.876	302.404	174.626	231.102	163.92	240.506	160.184
36	249.113	176.752	206.156	162.622	272.812	173.388	234.996	155.647	251.545	162.66	204.175	158.359	265.728	197.625	163.25	152.065	220.13	176.118	240.93	174.579	291.179	195.185	228.635	162.697	237.235	164.055
37	257.776	177.021	216.185	153.814	284.373	171.709	236.655	155.745	247.354	156.022	203.125	156.155	257.79	217.489	160.757	144.842	217.682	162.247	233.312	179.338	300.945	177.518	237.006	162.1	263.178	178.688
38	250.989	181.957	216.967	152.029	291.912	173.514	220.133	159.209	246.558	157.684	193.978	154.701	268.22	211.942	165.891	142.134	213.18	173.538	221.739	175.842	314.175	183.167	249.928	167.098	271.023	173.212
39	246.605	175.11	229.955	149.336	267.885	169.523	215.314	159.834	234.202	160.644	186.182	154.91	273.882	203.603	173.518	145.312	206.646	174.74	214.868	165.58	290.785	183.304	254.294	161.553	264.177	162
40	249.288	176.322	244.106	152.637	243.805	165.373	213.752	163.053	258.469	161.936	195.974	155.946	273.895	194.612	159.499	150.634	216.332	170.256	200.368	162.205	318.008	191.897	262.451	159.788	255.005	170.524
41	243.847	176.444	228.728	154.488	227.483	171.759	210.491	166.751	247.157	164.268	205.958	144.49	273.372	186.699	169.618	148.493	222.002	168.049	211.689	165.788	292.019	185.871	250.893	157.356	274.356	162.078
42	253.156	172.465	232.735	153.975	252.286	170.442	214.683	161.641	240.472	164.902	213.486	157.76	284.724	182.224	160.234	143.949	219.559	166.526	200.735	173.417	279.114	185.198	263.1	160.263	264.805	164.293
43	254.306	177.629	220.044	162.786	261.984	185.146	211.403	153.619	261.838	160.439	216.984	151.977	292.302	171.727	171.089	135.887	218.084	177.526	200.554	175.012	265.83	189.967	267.161	158.022	253.757	174.987
44	245.95	160.854	214.848	163.074	259.962	190.806	213.665	159.882	274.127	156.015	209.713	144.093	254.416	179.925	170.268	138.142	239.177	173.917	214.555	164.736	279.108	178.499	235.441	175.091	239.419	172.307
45	259.273	173.068	218.432	172.287	269.352	184.344	213.739	165.024	270.835	151.598	191.503	154.652	252.677	191.2	165.598	143.129	220.643	175.303	196.348	166.395	280.31	189.753	227.556	183.643	222.573	175.47
46	232.252	183.758	200.023	185.011	282.841	180.771	235.253	163.235	259.175	148.214	189.86	151.462	231.521	168.074	174.703	143.926	213.332	171.328	201.952	171.967	261.501	191.478	248.649	186.425	226.77	153.21
47	217.929	179.314	208.535	179.506	243.209	177.553	238.539	167.572	252.822	157.995	187.959	149.205	227.33	169.567	171.631	155.599	214.844	164.009	203.227	169.677	264.162	179.438	261.777	168.474	237.296	151.407
48	199.991	163.419	195.94	182.848	234.379	173.81	236.909	177.125	257.047	156.22	191.093	151.075	205.899	179.46	162.492	146.1	228.193	163.782	208.167	170.984	264.508	184.782	247.281	177.625	247.23	170.03
49	211.767	165.574	200.215	177.924	240.953	174.066	233.869	174.442	250.421	161.215	205.557	157.925	206.266	181.474	164.059	147.832	228.588	170.017	202.16	169.362	273.455	178.194	252.436	185.057	238.81	165.856
50	230.289	161.06	213.954	173.932	225.141	162.494	241.119	173.168	274.692	153.236	204.298	147.089	215.688	172.82	167.929	136.949	215.289	161.452	209.258	176.042	260.851	188.124	246.674	172.41	246.05	165.663
Average	257.527	174.539	223.345	165.067	278.025	179.338	249.466	168.989	251.18	163.371	206.202	156.508	235.768	185.618	180.099	153.011	224.115	169.263	216.931	168.936	283.525	180.312	261.269	173.642	232.476	168.536
SD	20.2854	8.40071	16.5969	8.75931	25.5312	8.67347	24.0595	10.041	14.089	6.54558	14.5922	7.51639	23.686	14.1118	14.3939	11.1143	12.5703	7.15109	11.4202	6.01519	17.0534	7.87576	19.4047	11.0856	16.2892	7.86585
Background subtraction
1	141.869	55.0287	142.282	55.0499	126.48	62.1156	118.714	49.0577	121.629	35.9135	103.41	28.8778	88.316	24.7614	57.6628	22.9012	106.229	24.5156	118.237	40.3055	157.212	50.3719	156.984	57.5518	97.2743	30.102
2	156.769	62.7442	143.762	42.0672	145.287	51.687	125.466	51.3076	114.831	43.333	113.571	20.0814	96.285	29.1237	66.401	34.9319	124.677	24.9856	122.901	47.2355	169.277	42.1079	166.125	58.2201	112.508	50.0935
3	165.264	65.3499	150.541	44.9679	163.369	53.6267	137.139	38.9388	127.053	47.7221	117.34	39.2412	89.041	33.5097	66.0308	28.5349	127.394	35.0019	122.812	42.1959	164.258	41.8759	177.155	55.3234	105.417	50.2788
4	162.935	59.9635	151.35	46.2786	163.547	42.1698	175.34	32.8769	140.702	39.0263	119.75	38.4129	115.378	48.3382	69.1454	29.8384	132.479	33.254	108.91	37.0067	167.962	52.1391	163.934	55.9416	109.767	53.9829
5	167.834	45.2497	133.685	40.0857	192.898	55.7617	175.539	43.6558	132.92	40.627	110.639	37.5191	117.003	56.3461	74.4031	32.2631	117.998	34.9686	103.574	40.8223	183.503	41.0196	159.371	64.0586	110.674	53.6266
6	165.014	38.3614	152.161	30.5976	193.816	57.8355	131.926	48.1339	122.13	39.8269	101.438	27.6087	109.707	41.8454	64.2519	35.0152	131.64	34.6228	122.186	45.2268	200.102	38.6127	158.958	50.2237	104.653	57.1667
7	160.248	60.1488	136.227	41.8815	172.931	46.6602	140.666	49.6889	124.579	41.6565	113.568	32.1308	109.804	34.3287	73.2012	43.6371	126.331	36.763	118.039	41.3851	188.599	43.5044	164.432	35.1242	124.066	46.0089
8	155.661	47.6714	111.311	31.5604	186.873	43.5434	155.03	54.3911	126.532	37.7323	122.646	39.1216	116.828	34.9902	70.6722	32.4687	112.947	50.8915	121.674	41.2744	162.694	50.0451	161.552	52.5978	146.015	46.3906
9	137.442	42.0676	124.305	44.838	188.419	54.9652	163.49	53.9647	132.419	33.98	118.741	36.228	103.158	42.585	76.8648	26.7407	120.754	57.7515	110.474	44.2482	176.739	52.2189	154.292	49.9876	134.219	41.4105
10	147.866	39.2637	117.205	38.9346	209.294	49.2939	151.27	44.8976	130.689	34.8335	137.757	45.4599	95.712	40.7921	90.082	14.1442	107.285	36.309	111.411	35.7478	163.352	53.1133	162.044	49.5859	109.186	43.3689
11	166.149	54.5474	114.316	44.8303	194.818	42.0157	160.409	40.6993	143.239	31.5252	133.803	27.7065	121.131	49.5601	95.0634	31.4191	118.426	40.0565	122.98	28.5149	164.389	58.1771	158.133	58.2753	113.833	47.8493
12	186.414	47.2681	109.251	43.9024	195.527	52.9246	155.486	37.6614	151.118	45.3	107.056	41.6769	116.397	52.1738	98.8936	39.0961	101.239	39.2992	129.55	28.9164	155.852	62.4771	150.485	52.7772	122.049	52.0127
13	175.359	53.269	97.8654	34.8997	197.849	55.6144	165.927	49.705	141.288	39.983	114.199	43.1647	113.477	63.9923	94.6104	40.282	99.2325	33.296	121.397	41.5868	164.304	65.7706	166.229	39.1165	114.219	47.3401
14	181.24	55.0233	95.4955	42.0147	201.023	53.6228	170.7	51.729	138.425	34.9624	111.073	38.6289	118.727	53.2415	92.0034	43.3239	118.491	33.6191	117.13	32.8736	173.315	43.1176	178.809	50.8592	119.712	48.5219
15	192.024	54.5527	91.512	55.1111	211.62	62.092	185.105	51.4294	151.096	40.7716	96.4585	34.3397	141.196	52.4707	88.8896	42.9758	134.355	31.547	92.6078	22.9999	203.512	50.8166	140.445	50.7201	121.053	43.9686
16	145.829	47.0756	91.1416	50.032	199.101	74.4755	174.541	53.4901	159.525	44.3007	107.221	39.799	123.28	53.4715	90.0736	23.7022	118.989	31.5245	101.448	34.2404	195.685	53.7427	157.644	64.4698	122.114	39.587
17	138.182	59.1852	97.9261	37.9668	207.456	68.917	178.013	57.1672	147.274	49.4549	118.13	32.3661	127.457	56.0281	93.0035	31.0591	98.8306	22.6392	104.893	30.7915	188.253	51.1737	175.381	50.968	121.088	41.1314
18	135.081	58.3359	102.937	38.3171	217.226	62.8472	175	53.4298	113.889	44.6278	104.931	22.4676	112.986	53.0336	97.1853	31.8258	93.0646	28.7372	108.674	29.4905	174.775	53.6936	175.526	55.2535	115.528	38.9413
19	137.496	62.7715	111.461	36.6543	212.544	52.1344	153.071	62.1263	141.097	37.9102	100.695	38.297	115.175	37.4791	102.426	20.5327	105.269	37.0435	127.778	30.8669	164.794	46.9751	179.093	63.9762	105.019	39.4771
20	136.285	58.024	101.26	28.6367	185.096	57.7417	160.723	69.0626	149.099	31.7108	90.3277	26.7652	137.332	49.2868	90.4012	24.7885	120.593	36.1389	132.442	35.6495	161.461	55.995	183.113	58.7162	113.448	31.4747
21	146.091	36.9917	103.122	26.4263	177.857	67.2093	175.273	53.7208	163.5	34.5894	95.4567	35.1526	131.205	59.7652	98.8028	23.0576	122.99	29.2155	111.31	39.919	167.042	62.059	177.275	75.553	120.392	39.0312
22	141.36	40.2248	105.562	32.3613	166.373	65.2295	160.322	41.5416	159.579	42.1865	100.089	23.8556	130.9	58.4976	90.6951	17.8047	125.324	34.7439	109.498	32.4357	163.998	58.117	192.446	68.7197	121.424	37.6644
23	152.179	39.4588	106.069	40.0968	197.728	63.3274	166.995	37.5338	173.844	52.8859	82.1897	24.0467	137.32	55.6236	73.3161	14.4422	135.997	38.1727	104.461	32.033	179.886	54.0279	174.992	63.0483	113.975	32.6967
24	161.29	42.8935	120.825	46.5686	189.382	43.5356	158.777	35.4097	159.768	36.802	86.5845	26.9899	135.305	54.6353	70.5448	17.8236	131.862	47.4869	109.708	33.8782	177.883	54.7215	153.936	51.3069	119.787	54.3055
25	190.22	54.9829	130.11	41.2622	164.231	47.4379	158.219	25.3136	147.48	36.0198	81.1567	29.6988	114.563	86.9128	82.9891	20.9572	132.35	49.3243	108.295	36.7851	213.326	49.4164	151.312	51.5372	106.991	54.1915
26	165.187	42.1265	121.142	34.8277	155.356	40.5064	163.477	32.0156	155.942	37.4834	82.2581	22.4267	120.514	82.0112	77.5706	26.2881	148.277	46.764	105.153	35.7448	200.12	49.6727	151.903	55.2396	112.07	37.3681
27	167.609	29.9861	113.556	36.0552	160.169	51.1041	163.021	33.3875	152.885	34.3274	89.451	30.0336	122.98	72.8139	61.6827	25.4704	151.014	33.1295	118.494	32.4218	182.779	64.7418	148.271	40.1961	109.145	40.6307
28	162.306	50.0784	119.454	36.6044	156.547	45.1745	151.485	34.4994	163.797	28.276	84.2516	14.191	113.722	60.8779	69.7154	21.7738	136.263	40.4268	106.77	41.6094	167.154	52.4785	159.182	32.5956	105.907	40.7317
29	148.74	43.3921	115.865	34.4737	160.536	48.8155	137.614	31.5947	144.885	39.5151	82.2646	18.2168	131.663	48.7201	73.8597	6.1676	121.324	36.6339	106.236	33.238	150.353	53.2427	156.74	41.9421	105.624	39.3523
30	143.875	43.6544	118.372	39.6749	154.322	62.1154	141.793	36.3222	156.028	37.2058	87.7685	19.6179	126.301	67.6053	73.6708	14.9897	107.596	45.7023	93.4602	50.5725	149.22	56.412	133.218	47.1886	114.175	38.5002
31	145.491	34.2463	116.596	31.814	163.917	51.0587	126.784	30.1891	138.575	30.2132	80.7805	23.1332	123.952	56.8114	87.8889	4.0095	111.251	51.6797	98.6934	39.0713	144.812	70.1301	116.744	43.4846	101.473	62.7456
32	141.615	45.7339	125.223	34.9916	166.73	48.133	119.526	30.1091	129.576	27.6532	89.3028	32.5148	142.316	55.5561	77.9588	2.2564	112.75	36.8403	113.306	38.9951	158.547	66.1664	110.811	40.727	118.451	55.1435
33	141.25	47.782	105.608	37.7871	152.597	47.6886	113.4	37.4618	129.591	29.5309	88.3062	19.9917	158.715	64.3083	67.0201	4.8651	115.57	41.185	110.748	22.4591	185.995	58.9922	124.69	26.0016	112.185	50.5317
34	143.461	48.895	100.292	31.9808	176.408	43.5562	122.55	38.48	143.653	31.4572	94.0117	30.084	155.544	63.2172	56.3419	20.9227	108.55	34.0437	119.253	34.9803	186.251	63.6116	127.34	31.4319	127.695	39.3273
35	130.567	48.2141	105.022	31.8832	177.967	49.672	132.367	34.9175	146.03	34.6037	86.0368	28.1725	162.021	66.4807	61.8153	13.997	105.457	34.7667	122.893	39.1261	192.684	49.9833	121.382	39.2769	130.786	35.5409
36	139.467	50.7055	96.5096	36.575	165.452	45.7433	127.636	28.0016	144.185	35.0152	96.8155	30.7144	159.177	65.8751	56.699	20.3153	113.579	44.3683	134.379	42.8287	181.459	70.5415	118.915	38.0537	127.515	39.4119
37	148.13	50.9744	106.539	27.7666	177.013	44.0636	129.295	28.1004	139.994	28.3767	95.7647	28.5101	151.239	85.7394	54.2062	13.0916	111.131	30.4972	126.761	47.5876	191.225	52.8753	127.286	37.4567	153.458	54.045
38	141.343	55.9097	107.321	25.9819	184.552	45.869	112.773	31.5643	139.198	30.0385	86.6179	27.0564	161.669	80.1921	59.3399	10.3841	106.629	41.7879	115.188	44.0916	204.455	58.5243	140.208	42.4552	161.303	48.5694
39	136.959	49.063	120.309	23.2887	160.525	41.8778	107.954	32.1889	126.842	32.9988	78.8217	27.2649	167.331	71.8534	66.9673	13.5619	100.095	42.9901	108.317	33.8296	181.065	58.6609	144.574	36.9097	154.457	37.3566
40	139.642	50.2746	134.46	26.5896	136.445	37.7276	106.392	35.4077	151.109	34.2914	88.6142	28.3007	167.344	62.8619	52.9477	18.8842	109.781	38.5065	93.8166	30.4553	208.288	67.2535	152.731	35.145	145.285	45.8815
41	134.201	50.3969	119.082	28.4408	120.123	44.1144	103.131	39.1059	139.797	36.6225	98.5978	16.8452	166.821	54.9489	63.067	16.7431	115.451	36.2988	105.138	34.0378	182.299	61.2285	141.173	32.7129	164.636	37.4347
42	143.51	46.4181	123.089	27.928	144.926	42.7966	107.323	33.9961	133.112	37.2571	106.126	30.1152	178.173	50.4744	53.6828	12.1993	113.008	34.7761	94.1838	41.6667	169.394	60.5555	153.38	35.6197	155.085	39.65
43	144.66	51.582	110.398	36.7394	154.624	57.5012	104.043	25.9743	154.478	32.7941	109.624	24.3324	185.751	39.9774	64.5384	4.1367	111.533	45.776	94.0028	43.2621	156.11	65.3238	157.441	33.3785	144.037	50.3442
44	136.304	34.8072	105.202	37.0274	152.602	63.1608	106.305	32.2369	166.767	28.3702	102.353	16.4484	147.865	48.1748	63.7165	6.3915	132.626	42.1671	108.004	32.9857	169.388	53.8557	125.721	50.4481	129.699	47.6636
45	149.627	47.0206	108.786	46.2401	161.992	56.6987	106.379	37.3792	163.475	23.953	84.143	27.007	146.126	59.4504	59.0467	11.3794	114.092	43.5532	89.7968	34.6453	170.59	65.1102	117.836	59.0004	112.853	50.8268
46	122.606	57.711	90.3767	58.9643	175.481	53.1261	127.893	35.5898	151.815	20.569	82.4999	23.8168	124.97	36.3239	68.152	12.1756	106.781	39.5777	95.4005	40.2173	151.781	66.8349	138.929	61.782	117.05	28.567
47	108.283	53.2666	98.8886	53.4589	135.849	49.9076	131.179	39.9275	145.462	30.3505	80.599	21.5601	120.779	37.817	65.0797	23.8485	108.293	32.259	96.6756	37.9267	154.442	54.7947	152.057	43.8312	127.576	26.7645
48	90.345	37.3722	86.2938	56.8011	127.019	46.1651	129.549	49.4802	149.687	28.5751	83.7334	23.4298	99.348	47.7105	55.9406	14.3498	121.642	32.0319	101.616	39.2342	154.788	60.1386	137.561	52.9816	137.51	45.3866
49	102.121	39.5272	90.5687	51.8775	133.593	46.4215	126.509	46.7974	143.061	33.5704	98.1974	30.2804	99.715	49.7244	57.5078	16.0823	122.037	38.2674	95.6085	37.6118	163.735	53.5508	142.716	60.4138	129.09	41.2132
50	120.643	35.0133	104.308	47.8847	117.781	34.8495	133.759	45.5227	167.332	25.5913	96.9377	19.4444	109.137	41.0697	61.378	5.1991	108.738	29.7022	102.707	44.2922	151.131	63.4813	136.954	47.7671	136.33	41.0203
Average	147.881	48.4921	113.699	39.02	170.665	51.6926	142.106	41.3436	143.82	35.7264	98.8421	28.8629	129.217	53.8678	73.5481	21.261	117.564	37.5128	110.38	37.1864	173.805	55.669	151.549	48.999	122.756	43.8926
SD	20.2854	8.40071	16.5969	8.75931	25.5312	8.67347	24.0595	10.041	14.089	6.54558	14.5922	7.51639	23.686	14.1118	14.3939	11.1143	12.5703	7.15109	11.4202	6.01519	17.0534	7.87576	19.4047	11.0856	16.2892	7.86585

## Sheet: 0.017 uM
0.017 uM Ca		Line witdh 7
	200213_111.nd2								200213_112.nd2								200213_113.nd2						200213_114.nd2
Background	106.952	125.153	106.952	125.153	106.952	125.153	106.952	125.153	107.468	128.157	107.468	128.157	107.468	128.157	107.468	128.157	110.01	125.517	110.01	125.517	110.01	125.517	106.732	127.304	106.732	127.304
	mCherry	GCaMP	mCherry	GCaMP	mCherry	GCaMP	mCherry	GCaMP	mCherry	GCaMP	mCherry	GCaMP	mCherry	GCaMP	mCherry	GCaMP	mCherry	GCaMP	mCherry	GCaMP	mCherry	GCaMP	mCherry	GCaMP	mCherry	GCaMP
1	245.56	175.151	226.995	188.465	246.681	172.761	200.002	144.273	184.194	183.632	207.393	162.772	183.515	160.132	215.796	147.999	197.032	189.065	251.262	156.151	243.995	170.532	211.046	176.507	179.884	190.975
2	262.413	194.36	231.788	186.092	250.751	165.113	190.512	146.689	196.7	179.421	223.239	181.987	191.846	152.747	227.625	153.393	220.207	167.165	252.053	159.08	242.661	173.126	199.655	175.06	187.485	177.943
3	266.231	200.978	221.064	182.309	250.917	165.554	182.977	151.802	199.66	171.209	209.024	178.199	203.889	152.363	253.995	146.75	219.021	173.195	231.97	159.959	256.148	175.61	211.644	168.774	170.144	180.676
4	275.643	202.404	213.354	177.736	239.614	157.832	192.001	152.607	201.306	174.885	202.97	190.648	212.895	154.997	236.848	150.129	211.651	177.883	226.25	169.507	276.986	178.774	197.181	170.594	167.98	180.932
5	265.192	189.779	225.343	179.501	228.939	160.192	190.268	153.96	187.585	179.501	200.978	169.19	207.995	153.359	223.963	148.963	211.621	176.204	233.804	164.29	290.675	179.485	206.036	170.521	170.519	176.992
6	251.338	177.536	247.564	191.175	217.711	162.545	195.257	147.284	172.252	185.144	195.089	166.477	196.308	159.998	229.878	156.583	213.998	180.231	218.806	168.72	289.519	176.715	227.115	180.13	175.815	182.845
7	250.178	185.199	239.815	177.447	209.733	164.779	213.321	149.249	199.39	180.335	198.098	156.376	189.926	148.862	229.265	149.338	205.972	192.118	240.011	158.449	275.835	162.668	231.696	176.747	174.201	179.262
8	255.99	191.592	233.319	183.609	208.659	162.34	208.46	150.746	197.225	184.921	207.954	173.413	211.564	158.265	244.093	143.637	224.204	183.702	259.269	159.578	260.638	152.426	233.117	166.374	186.633	179.954
9	250.372	196.216	233.068	185.558	232.67	157.789	197.413	152.568	189.342	171.748	205.261	165.675	205.142	146.762	237.457	137.78	233.555	184.774	235.846	158.246	257.153	161.57	216.469	177.449	187.165	181.872
10	251.49	191.218	237.36	186.727	243.446	160.332	191.363	144.31	183.625	179.21	188.498	155.292	215.912	154.768	220.31	138.305	243.678	169.779	240.245	160.624	274.777	162.111	206.729	191.835	176.612	169.402
11	245.041	192.298	221.181	190.823	250.598	157.909	195.631	137.733	193.588	192.887	192.186	167.796	204.904	148.503	217.166	148.198	243.985	172.312	242.86	157.976	298.683	147.982	210.543	183.975	171.789	174.732
12	244.019	190.078	249.216	184.419	252.07	160.567	200.972	145.413	196.48	173.748	187.802	169.649	193.928	154.422	221.048	159.067	244.739	162.607	262.716	154.936	312.127	169.993	215.41	190.258	162.982	197.439
13	240.331	185.868	251.667	195.953	226.928	148.028	198.557	153.778	192.013	176.503	209.387	149.868	192.573	159.508	220.68	156.124	256.977	170.252	245.728	162.363	280.285	168.991	219.299	177.319	175.774	182.305
14	228.03	189.012	259.626	201.948	225.604	151.549	203.898	152.486	181.157	172.507	212.492	152.813	196.743	146.926	211.727	148.722	248.536	166.06	237.132	163.878	259.274	159.504	222.364	171.638	183.63	168.242
15	239.188	190.203	248.218	186.238	223.882	151.169	204.055	141.305	170.838	168.853	205.814	158.014	201.189	149.198	211.174	144.524	228.545	181.776	245.541	165.574	276.968	155.532	219.337	174.57	174.768	172.901
16	226.705	183.257	269.91	182.148	221.46	155.069	194.074	149.614	166.116	169.922	196.949	156.592	190.733	158.895	190.852	151.162	244.379	174.967	281.082	161.066	265.865	158.295	228.312	170.69	186.954	167.606
17	240.852	183.381	269.056	184.599	223.593	159.355	202.875	141.891	179.541	164.542	195.471	168.099	197.833	160.969	190.922	146.492	245.044	175.318	273.859	168.193	271.229	151.437	231.684	174.756	168.961	179.527
18	224.936	185.989	270.104	179.846	225.32	156.118	201.096	143.858	162.487	179.676	206.314	170.676	198.429	139.513	189.849	151.941	241.031	169.631	265.392	161.349	273.323	167.147	236.007	170.091	171.084	190.563
19	237.012	196.564	273.107	180.979	200.047	155.455	192.152	143.572	180.572	169.461	196.957	173.368	193.608	148.671	193.847	157.36	246.06	173.322	261.522	161.251	279.507	166.543	229.455	165.343	169.121	171.391
20	247.57	198.758	259.62	182.026	213.165	158.618	180.073	139.411	183.548	175.409	196.61	176.787	204.228	145.691	191.519	155.236	248.391	176.168	255.016	152.122	276.783	163.282	237.766	175.031	181.135	163.384
21	268.483	207.685	262.224	189.369	220.365	158.215	184.695	139.084	182.125	181.088	195.653	178.547	200.229	153.893	204.734	156.513	241.702	162.439	264.515	155.593	272.425	154.071	230.35	165.085	191.688	174.833
22	262.981	195.104	263.576	188.467	221.36	166.134	190.107	136.864	191.993	181.181	208.731	178.8	198.682	155.012	208.19	160.676	268.673	160.759	271.237	153.722	276.447	161.155	229.492	165.797	187.648	189.79
23	245.753	187.874	278.671	185.202	196.811	150.749	197.21	139.389	187.732	175.281	199.736	187.158	182.898	163.72	217.446	161.355	279.135	159.969	258.038	150.297	281.074	161.936	221.06	172.593	184.655	178.427
24	249.857	180.625	273.986	188.745	192.183	153.864	194.49	150.605	184.231	183.737	199.275	179.073	199.011	159.587	228.676	161.536	275.386	157.157	260.257	163.05	275.45	146.899	213.753	163.945	184.204	184.146
25	240.26	200.844	278.157	183.476	210.538	153.792	176.726	144.962	198.447	181.237	193.687	171.305	204.722	159.657	240.774	153.477	270.228	156.941	268.885	157.683	267.777	150.451	238.415	158.454	183.665	171.756
26	232.738	207.266	277.711	188.095	214.673	147.981	178.349	141.245	191.109	187.681	193.044	171.972	206.248	157.999	267.592	148.506	259.824	165.062	270.987	154.547	250.634	169.226	219.81	157.675	189.873	189.153
27	250.99	219.283	270.915	175.407	231.779	150.942	187.309	136.491	207.069	180.43	193.656	171.054	206.994	157.246	273.874	147.447	258.923	160.223	280.149	157.745	250.912	169.052	221.878	166.922	185.433	169.22
28	246.868	199.875	273.413	177.011	218.274	156.673	186.349	141.091	198.253	185.431	209.66	162.299	218.091	155.535	266.066	148.19	261.204	161.103	262.435	161.94	259.422	153.553	230.766	163.329	189.442	169.031
29	243.702	195.768	303.646	183.146	222.202	161.52	198.868	148.336	195.209	194.489	207.869	163.476	209.493	154.821	262.182	139.726	268.427	168.627	269.539	161.356	291.024	155.838	219.052	162.695	183.548	166.04
30	240.012	197.579	299.575	178.029	221.788	160.967	206.882	155.825	204.308	190.143	201.18	161.444	194.263	156.867	270.037	137.675	251.416	165.183	249.694	152.018	273.067	155.859	207.799	156.158	191.039	166.546
31	242.241	187.345	284.363	173.012	240.34	165.452	197.604	148.951	188.838	192.911	200.447	150.992	206.476	164.103	277.376	151.366	248.129	168.213	236.61	154.417	254.345	159.379	198.349	159.209	184.875	167.22
32	235.934	181.61	278.78	182.009	244.919	162.456	189.174	149.533	214.479	181.43	167.533	164.68	203.036	162.222	268.506	142.687	258.2	162.266	235.087	155.981	253.509	155.438	206.19	162.625	188.444	170.355
33	256.845	188.009	280.494	179.156	234.078	160.284	203.228	149.125	204.688	191.1	184.474	165.344	209.713	159.116	262.491	149.242	264.115	157.873	228.119	164.209	254.706	149.573	207.452	159.949	176.428	173.357
34	255.763	177.524	282.965	165.332	237.122	158.338	194.413	141.178	196.291	180.608	176.876	176.183	212.827	165.12	261.877	149.741	273.735	166.594	236.452	159.904	266.908	148.306	214.095	164.714	173.982	184.765
35	263.678	197.992	290.089	171.68	232.299	149.862	194.76	147.96	202.059	179.196	174.348	164.105	212.602	168.595	267.57	147.622	281.142	158.4	239.665	147.759	262.982	152.275	225.181	162.967	177.908	187.076
36	241.672	186.497	285.703	170	235.945	145.547	205.978	149.905	196.905	200.072	174.583	180.511	202.031	173.675	287.124	140.354	280.554	164.827	240.216	155.059	268.766	159.711	222.079	167.465	175.837	184.94
37	236.549	188.756	268.744	168.513	233.132	155.063	186.018	155.102	202.222	189.592	186.228	168.991	188.232	160.068	291.842	147.882	262.576	173.848	253.963	150.156	277.413	155.448	221.372	160.039	185.667	172.077
38	236.193	199.961	275.459	170.283	228.573	152.01	189.665	161.395	196.068	179.062	187.644	165.004	195.513	153.112	288.378	149.305	241.611	162.371	244.229	151.226	291.583	158.932	230.868	165.202	192.41	174.74
39	247.542	186.245	264.437	169.439	220.019	150.667	199.593	160.145	183.383	181	192.917	162.212	189.37	151.395	270.93	144.51	237.892	163.181	265.925	156.766	282.302	157.164	231.557	182.111	186.346	172.914
40	265.486	193.886	276.757	162.469	239.56	162.579	195.459	146.784	191.564	189.598	184.91	163.513	192.645	164.049	253.408	143.762	246.986	166.576	269.808	156.094	258.245	153.274	223.332	180.797	193.625	183.122
41	256.036	191.624	280.613	169.811	222.76	150.693	205.004	148.935	185.862	183.298	185.267	163.569	190.051	162.356	252.779	147.581	230.176	173.648	266.546	149.809	267.994	153.678	224.016	163.814	195.447	179.41
42	247.557	186.527	282.635	172.672	226.409	146.225	202.573	147.646	193.915	199.469	196.172	168.296	208.057	158.166	251.779	142.351	254.307	158.842	264.848	145.94	262.715	149.418	223.596	165.954	198.193	180.683
43	249.613	188.747	282.575	170.555	238.398	144.345	205.196	148.566	191.528	194.957	194.513	155.201	218.86	158.034	255.305	137.114	271.664	161.287	242.716	151.504	264.165	146.741	205.245	169.358	198.559	202.95
44	272.192	190.511	276.509	171.089	246.807	159.04	203.175	138.091	200.751	181.869	180.117	167.384	215.354	163.973	273.226	139.262	278.83	159.247	255.152	145.739	251.709	152.332	199.828	177.552	189.382	179.65
45	275.205	185.609	268.786	164.887	226.32	161.313	210.208	139.655	188.186	191.788	195.97	157.025	207.654	158.21	285.986	141.852	273.136	164.173	268.591	146.238	245.766	157.771	207.739	190.985	195.753	185.762
46	270.836	174.736	271.093	156.748	228.797	159.599	202.717	137.122	195.776	200.848	203.834	163.433	227.995	161.699	261.866	137.239	272.722	162.229	246.9	154.362	231.379	156.012	216.602	162.245	197.112	172.744
47	287.687	180.257	258.31	157.345	226.11	157.387	203.872	132.384	188.135	185.325	203.279	168.6	210.724	162.821	270.077	138.203	266.04	162.005	241.705	151.904	239.867	149.795	218.153	167.02	196.752	182.793
48	274.411	181.249	250.017	160.881	224.493	153.828	178.81	140.469	181.797	184.597	209.961	165.669	206.993	155.17	265.769	147.573	244.901	168.814	241.204	154.295	253.218	159.995	224.578	167.797	208.084	176.809
49	244.524	187.921	258.985	162.608	216.121	153.022	205.718	148.801	196.247	183.653	219.255	160.855	212.948	154.804	252.377	149.609	260.428	160.085	246.834	153.963	227.32	154.639	224.774	163.334	197.471	181.246
50	250.381	182.836	266.088	164.231	222.07	159.2	202.894	144.088	187.351	187.209	208.831	155.25	205.966	154.575	232.973	159.122	261.209	168.69	275.008	150.887	233.038	151.688	197.014	170.131	199.904	180.739
Average	250.802	190.592	262.933	178.145	227.321	157.016	196.24	146.246	190.883	182.636	197.363	167.113	202.617	156.803	242.584	148.264	249.438	168.343	252.314	156.949	266.172	159.227	218.905	170.072	184.12	178.425
SD	13.8874	8.8037	21.3126	10.2054	13.8036	6.01562	8.75338	6.31847	10.2898	8.31649	11.5612	9.08527	9.76126	6.25837	29.074	6.74977	21.1343	8.53279	15.2776	5.86057	17.5508	8.64639	11.1904	8.56865	10.0729	8.28685
Background subtraction
1	138.608	49.9985	120.043	63.3116	139.729	47.608	93.05	19.1197	76.7259	55.4751	99.9254	34.6149	76.0472	31.9755	108.328	19.8416	87.0225	63.5477	141.252	30.6337	133.985	45.0147	104.314	49.2032	73.1517	63.6709
2	155.461	69.2072	124.836	60.9392	143.799	39.9597	83.56	21.5362	89.2315	51.2637	115.771	53.8297	84.3776	24.5903	120.157	25.2356	110.197	41.6479	142.043	33.563	132.651	47.6092	92.9229	47.7562	80.7532	50.6392
3	159.279	75.8247	114.112	57.1562	143.965	40.4006	76.025	26.6489	92.1915	43.0519	101.556	50.042	96.4213	24.2059	146.527	18.5935	109.011	47.6781	121.96	34.4421	146.138	50.0927	104.912	41.4695	63.4116	53.3718
4	168.691	77.2512	106.402	52.5828	132.662	32.6788	85.0486	27.4545	93.8385	46.728	95.5016	62.4909	105.427	26.8404	129.38	21.9723	101.641	52.3659	116.24	43.9898	166.976	53.2568	90.4495	43.2896	61.2479	53.6276
5	158.24	64.6263	118.391	54.3481	121.987	35.0395	83.3155	28.8072	80.1166	51.344	93.5097	41.033	100.527	25.2017	116.495	20.8058	101.611	50.6872	123.794	38.7725	180.665	53.968	99.3035	43.2172	63.787	49.6882
6	144.386	52.3826	140.612	66.0216	110.759	37.3916	88.3052	22.1308	64.7845	56.9874	87.6209	38.3201	88.8396	31.8411	122.41	28.426	103.988	54.7135	108.796	43.2032	179.509	51.1976	120.383	52.8262	69.0827	55.5409
7	143.226	60.0456	132.863	52.2937	102.781	39.6259	106.369	24.0958	91.9223	52.1778	90.6297	28.2187	82.4582	20.7052	121.797	21.1808	95.9617	66.6005	130.001	32.9324	165.825	37.1514	124.964	49.4428	67.4685	51.9575
8	149.038	66.4386	126.367	58.4561	101.707	37.1867	101.508	25.5926	89.7566	56.7636	100.486	45.2559	104.096	30.1081	136.625	15.4798	114.194	58.1852	149.259	34.0608	150.628	26.9087	126.385	39.0697	79.9011	52.6498
9	143.42	71.0633	126.116	60.4053	125.718	32.6356	90.4608	27.4153	81.8743	43.5912	97.793	37.5182	97.6736	18.6054	129.989	9.6233	123.545	59.2574	125.836	32.7287	147.143	36.0529	109.737	50.1451	80.4331	54.5678
10	144.538	66.0648	130.408	61.5739	136.494	35.1794	84.4111	19.1572	76.1567	51.053	81.0296	27.1353	108.444	26.6107	112.842	10.1482	133.668	44.2615	130.235	35.1071	164.767	36.5941	99.9974	64.5315	69.88	42.098
11	138.089	67.1449	114.229	65.6697	143.646	32.7559	88.6794	12.5798	86.1204	64.7303	84.7182	39.6391	97.4362	20.3456	109.698	20.0412	133.975	46.7946	132.85	32.4587	188.673	22.4651	103.811	56.6713	65.0567	47.4285
12	137.067	64.9254	142.264	59.2663	145.118	35.4145	94.0202	20.2604	89.0121	45.5911	80.3343	41.4917	86.4602	26.2648	113.58	30.9097	134.729	37.0896	152.707	29.4188	202.117	44.4757	108.678	62.954	56.2497	70.1351
13	133.379	60.7152	144.715	70.7997	119.976	22.8749	91.6054	28.6245	84.5446	48.3462	101.919	21.7111	85.1054	31.3506	113.212	27.9667	146.967	44.7347	135.718	36.8458	170.275	43.4742	112.567	50.0146	69.0417	55.0013
14	121.078	63.8587	152.674	76.7953	118.652	26.3965	96.9457	27.3327	73.689	44.3505	105.023	24.6563	89.2747	18.7693	104.259	20.5648	138.526	40.5432	127.122	38.3609	149.264	33.9872	115.632	44.3337	76.8975	40.9378
15	132.236	65.0497	141.266	61.0855	116.93	26.0156	97.1032	16.1522	63.3702	40.6965	98.3455	29.8569	93.7207	21.0411	103.706	16.3671	118.535	56.2593	135.531	40.0569	166.958	30.0153	112.605	47.2661	68.0355	45.5968
16	119.753	58.1036	162.958	56.9952	114.508	29.9159	87.1216	24.4607	58.6478	41.7648	89.4809	28.4349	83.2651	30.7385	83.384	23.0047	134.368	49.4503	171.072	35.5487	155.855	32.7778	121.581	43.3862	80.2218	40.3024
17	133.9	58.2275	162.104	59.4462	116.641	34.2018	95.9229	16.7377	72.0732	36.3854	88.0033	39.9422	90.365	32.8123	83.454	18.3349	135.034	49.8007	163.849	42.676	161.219	25.9199	124.952	47.4522	62.2289	52.2231
18	117.984	60.8365	163.152	54.6929	118.368	30.9651	94.1436	18.7047	55.0194	51.5192	98.8458	42.5188	90.9605	11.3563	82.381	23.7842	131.021	44.1144	155.382	35.8323	163.313	41.63	129.275	42.7871	64.3516	63.2586
19	130.06	71.4108	166.155	55.8258	93.0946	30.3022	85.2004	18.419	73.1037	41.3039	89.4885	45.2111	86.1399	20.5137	86.379	29.203	136.05	47.8049	151.512	35.7343	169.497	41.0263	122.723	38.0385	62.3891	44.0869
20	140.618	73.6047	152.668	56.8726	106.213	33.4645	73.1209	14.2579	76.0802	47.2522	89.1417	48.6299	96.7603	17.5338	84.051	27.0788	138.381	50.6514	145.006	26.6053	166.773	37.7648	131.034	47.7274	74.4027	36.0796
21	161.531	82.5322	155.272	64.2158	113.413	33.0625	77.7427	13.9315	74.657	52.9306	88.1854	50.39	92.7612	25.7362	97.266	28.3556	131.692	36.9215	154.505	30.0763	162.416	28.5538	123.618	37.7813	84.9557	47.5295
22	156.029	69.9508	156.624	63.314	114.408	40.9812	83.1548	11.7111	84.5249	53.0244	101.263	50.6432	91.2137	26.8549	100.722	32.5188	158.663	35.2416	161.227	28.205	166.437	35.638	122.76	38.4934	80.9164	62.4862
23	138.801	62.7211	171.719	60.049	89.8591	25.5961	90.2579	14.2362	80.2643	47.1236	92.2675	59.0014	75.43	35.5633	109.978	33.1983	169.125	34.4523	148.029	24.7795	171.064	36.4193	114.328	45.2891	77.9227	51.1229
24	142.905	55.4718	167.034	63.5917	85.2314	28.7111	87.5382	25.4515	76.7626	55.5796	91.8075	50.9162	91.5429	31.43	121.208	33.3795	165.376	31.6399	150.247	37.5331	165.44	21.382	107.021	36.6406	77.4725	56.842
25	133.308	75.6914	171.205	58.3229	103.586	28.6395	69.7742	19.8092	90.9789	53.0802	86.2187	43.1483	97.2542	31.5002	133.306	25.3197	160.218	31.4242	158.875	32.166	157.767	24.9341	131.683	31.1505	76.9328	44.4516
26	125.786	82.1125	170.759	62.9416	107.721	22.8282	71.3972	16.0918	83.641	59.5236	85.5756	43.8149	98.78	29.8423	160.124	20.3487	149.814	39.5448	160.977	29.0303	140.624	43.7094	113.078	30.3711	83.1413	61.849
27	144.038	94.1297	163.963	50.2536	124.827	25.7895	80.3566	11.3382	99.6012	52.2735	86.1883	42.8966	99.5265	29.0889	166.406	19.2899	148.913	34.7064	170.139	32.2278	140.902	43.5354	115.146	39.6178	78.701	41.9163
28	139.916	74.7215	166.461	51.8579	111.322	31.5197	79.3972	15.9384	90.7853	57.2736	102.192	34.1422	110.623	27.3781	158.598	20.0328	151.194	35.5863	152.425	36.4231	149.412	28.0357	124.034	36.0249	82.7105	41.7266
29	136.75	70.6146	196.694	57.9928	115.25	36.3669	91.9163	23.1829	87.7415	66.3317	100.401	35.3194	102.025	26.6642	154.714	11.5686	158.417	43.1098	159.529	35.8385	181.014	30.3208	112.32	35.3914	76.8164	38.7355
30	133.06	72.4262	192.623	52.8757	114.836	35.814	99.9297	30.6717	96.8401	61.9857	93.7118	33.2872	86.7955	28.7097	162.569	9.5185	141.406	39.6658	139.684	26.5013	163.058	30.3425	101.067	28.8538	84.3069	39.2419
31	135.289	62.1921	177.411	47.8586	133.388	40.2993	90.6524	23.7984	81.3695	64.7535	92.9788	22.835	99.0084	35.9456	169.908	23.2091	138.119	42.6962	126.6	28.8997	144.335	33.8623	91.6172	31.905	78.1426	39.9157
32	128.982	56.457	171.828	56.8563	137.967	37.3028	82.2217	24.3797	107.011	53.2728	60.0651	36.523	95.5678	34.0647	161.038	14.5303	148.19	36.7494	125.077	30.4642	143.499	29.9209	99.4579	35.3215	81.7124	43.0513
33	149.893	62.8562	173.542	54.0026	127.126	35.1314	96.2756	23.9722	97.2197	62.9426	77.006	37.1871	102.245	30.9594	155.023	21.0851	154.105	32.3557	118.109	38.6921	144.696	24.0561	100.72	32.6453	69.6955	46.0535
34	148.811	52.3706	176.013	40.1793	130.17	33.185	87.4607	16.0252	88.8232	52.4512	69.4077	48.0259	105.359	36.9628	154.409	21.584	163.725	41.0769	126.442	34.3872	156.898	22.7889	107.363	37.4096	67.2497	57.4612
35	156.726	72.8392	183.137	46.5266	125.347	24.709	87.8075	22.8074	94.5909	51.0393	66.8796	35.9482	105.134	40.4378	160.102	19.4647	171.132	32.8835	129.655	22.2417	152.972	26.7579	118.449	35.6626	71.1764	59.7717
36	134.72	61.3444	178.751	44.8474	128.993	20.3937	99.0257	24.7517	89.4365	71.9152	67.1147	52.3536	94.5629	45.5177	179.656	12.1973	170.544	39.3096	130.207	29.5419	158.756	34.1936	115.347	40.1606	69.1049	57.636
37	129.597	63.6029	161.792	43.3605	126.18	29.9101	79.0656	29.9492	94.7536	61.4348	78.7599	40.8338	80.7643	31.9113	184.374	19.7249	152.566	48.3313	143.953	24.6389	167.404	29.9309	114.64	32.7347	78.9345	44.7728
38	129.241	74.8082	168.507	45.1301	121.621	26.857	82.7132	36.2422	88.5998	50.9047	80.1759	36.8466	88.0455	24.9551	180.91	21.1484	131.601	36.8538	134.219	25.7089	181.573	33.4146	124.136	37.898	85.6779	47.4359
39	140.59	61.0917	157.485	44.2864	113.067	25.5144	92.6411	34.9922	75.9154	52.8435	85.4494	34.0545	81.9016	23.238	163.462	16.3532	127.882	37.664	155.915	31.2486	172.292	31.6468	124.825	54.8074	79.6143	45.61
40	158.534	68.733	169.805	37.3164	132.608	37.4256	88.5068	21.6305	84.0963	61.4413	77.4424	35.3556	85.177	35.8921	145.94	15.6054	136.976	41.0592	159.798	30.5769	148.235	27.757	116.6	53.4932	86.8928	55.8178
41	149.084	66.4709	173.661	44.6585	115.808	25.5403	98.0523	23.7825	78.3941	55.1407	77.7988	35.4115	82.5827	34.1988	145.311	19.4243	120.166	48.1305	156.536	24.2921	157.984	28.1609	117.284	36.5104	88.7148	52.1062
42	140.605	61.3736	175.683	47.5192	119.457	21.0715	95.6215	22.4933	86.4473	71.3116	88.7041	40.1393	100.589	30.0093	144.311	14.1939	144.297	33.3248	154.838	20.4229	152.705	23.9013	116.864	38.6499	91.4614	53.3791
43	142.661	63.5941	175.623	45.4021	131.446	19.1922	98.2436	23.4128	84.0595	66.8001	87.045	27.0442	111.392	29.8766	147.837	8.9566	161.654	35.7702	132.706	25.9865	154.155	21.2242	98.5126	42.0537	91.8273	75.6463
44	165.24	65.3581	169.557	45.936	139.855	33.8873	96.2232	12.9385	93.2834	53.7121	72.6494	39.2267	107.886	35.8163	165.758	11.1046	168.82	33.7299	145.142	20.2217	141.699	26.8148	93.0957	50.2476	82.6496	52.3465
45	168.253	60.4561	161.834	39.7336	119.368	36.1596	103.256	14.502	80.7181	63.6313	88.502	28.8679	100.186	30.0533	178.518	13.6951	163.126	38.6561	158.581	20.7212	135.755	32.2543	101.007	63.6814	89.021	58.4583
46	163.884	49.5833	164.141	31.5954	121.845	34.4462	95.7648	11.9692	88.3076	72.6907	96.3665	35.2755	120.527	33.5419	154.398	9.082	162.712	36.7118	136.89	28.8454	121.368	30.4948	109.87	34.9412	90.3797	45.4404
47	180.735	55.1041	151.358	32.1923	119.158	32.2344	96.9196	7.2312	80.6672	57.1679	95.8109	40.4429	103.256	34.6642	162.609	10.0462	156.03	36.4882	131.695	26.3867	129.857	24.2781	111.421	39.7165	90.0201	55.4887
48	167.459	56.0964	143.065	35.7285	117.541	28.6754	71.8581	15.3159	74.3294	56.44	102.493	37.5124	99.5254	27.0128	158.301	19.4156	134.891	43.2973	131.194	28.778	143.207	34.4785	117.846	40.4925	101.352	49.5047
49	137.572	62.7678	152.033	37.4547	109.169	27.8685	98.7656	23.6477	88.7789	55.4957	111.787	32.6977	105.48	26.6469	144.909	21.4516	150.418	34.5677	136.824	28.4458	117.31	29.122	118.042	36.0297	90.7395	53.9416
50	143.429	57.6832	159.136	39.0778	115.118	34.0472	95.942	18.935	79.883	59.0525	101.363	27.0929	98.4984	26.4179	125.505	30.9647	151.199	43.173	164.998	25.3701	123.028	26.1706	90.282	42.8272	93.1723	53.435
Average	143.85	65.4387	155.981	52.9923	120.369	31.8634	89.288	21.0925	83.4148	54.4789	89.8947	38.9557	95.1488	28.646	135.116	20.1066	139.428	42.8262	142.304	31.4324	156.162	33.7096	112.173	42.7677	77.3881	51.1207
SD	13.8874	8.8037	21.3126	10.2054	13.8036	6.01562	8.75338	6.31847	10.2898	8.31649	11.5612	9.08527	9.76126	6.25837	29.074	6.74977	21.1343	8.53279	15.2776	5.86057	17.5508	8.64639	11.1904	8.56865	10.0729	8.28685

[truncated: 2 more sheets: 0 uM, Summary]
