# Supplementary material for: Testing the ion-current model for flagellar length sensing and IFT regulation
Source: eLife. 2023 Jan 13;12:e82901. doi: 10.7554/eLife.82901 (PMC9891718; doi:10.7554/eLife.82901)
Supplement: Figure 3—source data 1. [file elife-82901-fig3-data1.xlsx]

## Sheet: Data
Control
Name	Num of Peaks	Peak height (mean)	Peak width (mean)	Peak area (mean)	Peak interval (mean, px)	Peak interval (mean, s)	Total peak itensity (calcium amount)	Frequency	Name	Length	Length (um)
190328-11A	2	3481.63	299	1.04863e+06	90	4.65598	57914.1	0.0552286	190328-11A	81.495	8.53008
190328-11B	0	NaN	NaN	NaN	NaN	NaN	0	0	190328-11B	81.597	8.54076
190328-12A	23	4030.76	23.4012	80844.5	34.7273	1.79655	44928.3	0.555737	190328-12A	88.273	9.23953
190328-12B	7	4679.84	44.9104	172207	82.3333	4.25936	29126.7	0.169137	190328-12B	88.487	9.26193
190328-13A	0	NaN	NaN	NaN	NaN	NaN	0	0	190328-13A	93.74	9.81177
190328-13B	15	3347.45	22.8279	72602.4	45.5	2.35385	30073	0.414214	190328-13B	94.041	9.84327
190328-13C	0	NaN	NaN	NaN	NaN	NaN	0	0	190328-13C	72.18	7.55508
190328-13D	17	1992.9	18.1033	32252.8	38.0625	1.96909	15140.9	0.469443	190328-13D	73.356	7.67817
190328-14A	0	NaN	NaN	NaN	NaN	NaN	0	0	190328-14A	73.54	7.69743
190328-14B	6	5523.42	34.4783	208314	97	5.01811	34514.6	0.165686	190328-14B	74.392	7.78661
190328-15A	6	4906.71	35.977	176960	59.6	3.08329	51309.4	0.28995	190328-15A	75.076	7.8582
190328-15B	4	5944.49	28.5481	178540	45.6667	2.36248	34511.8	0.1933	190328-15B	72.365	7.57444
190328-16A	11	907.786	59.7854	50868.2	66.7	3.45059	15451.6	0.303757	190328-16A	65.327	6.83778
190328-16B	0	NaN	NaN	NaN	NaN	NaN	0	0	190328-16B	66.965	7.00923
190328-17A	30	1694.76	16.3167	27298.4	23.6207	1.22197	22614.7	0.828429	190328-17A	82.918	8.67903
190328-17B	29	1929.51	16.3391	31233.1	24.3929	1.26192	25011.9	0.800814	190328-17B	80.377	8.41306
190328-17C	16	995.543	30.9434	27226.6	38.7333	2.00379	12029.5	0.441829	190328-17C	68.33	7.1521
190328-17D	21	1753.41	21.5619	36308.3	33.9	1.75375	21055.2	0.5799	190328-17D	65.86	6.89357
190328-18A	10	5640.7	47.9902	222691	72.6667	3.75927	61494.5	0.276143	190328-18A	69.93	7.31957
190328-18B	12	4894.27	27.7446	142695	42.1818	2.18219	47285	0.331371	190328-18B	72.421	7.58031
190328-19A	13	2373.16	39.7982	60885	46.5833	2.4099	21856.8	0.358986	190328-19A	86.129	9.01512
190328-19B	26	6164.54	24.2086	147654	25.64	1.32644	106011	0.717971	190328-19B	82.503	8.63559
190328-19C	7	3304.24	27.6349	98566.8	30	1.55199	19053	0.1933	190328-19C	74.091	7.7551
190328-19D	7	1850.29	43.3097	48151.9	99.1667	5.13019	9307.77	0.1933	190328-19D	75.817	7.93577
190328-20A	30	4187.41	17.8381	75311.1	22.3793	1.15775	62389.8	0.828429	190328-20A	55.377	5.79631
190328-20B	30	4175.84	18.3122	77317.1	22.9655	1.18808	64051.7	0.828429	190328-20B	56.463	5.90998
190328-21A	27	2473.94	18.2089	44980.3	19.0769	0.986908	42683.1	0.948927	190328-21A	67.884	7.10542
190328-21B	17	2721.82	22.4512	60761.6	34.6875	1.79449	28524.1	0.469443	190328-21B	67.85	7.10186
190328-22A	23	4231.75	19.8893	81282.7	30.4091	1.57316	51625	0.635129	190328-22A	76.741	8.03248
190328-22B	19	3612.6	16.4901	55737.6	37.1667	1.92275	29243.9	0.524671	190328-22B	71.799	7.5152
190328-22C	25	3125.02	18.4115	60840	28.5417	1.47655	42001.3	0.690357	190328-22C	77.755	8.13862
190328-22D	10	1162.14	58.929	59940	60.6667	3.13847	16552	0.276143	190328-22D	76.972	8.05666
190328-23A	0	NaN	NaN	NaN	NaN	NaN	0	0	190328-23A	70.232	7.35118
190328-23B	18	1740.74	16.8406	28397.7	37.7059	1.95064	14115.3	0.497057	190328-23B	67.21	7.03487
190328-24A	1	2307.91	560.346	1.29323e+06	NaN	NaN	35711.6	0.0276143	190328-24A	48.984	5.12716
190328-24B	7	2641.87	57.5045	104593	78.5	4.06105	20217.7	0.1933	190328-24B	51.184	5.35743
190328-36A	15	795.528	32.3421	24007.9	40.7143	2.10627	9944.4	0.414214	190328-36A	64.204	6.72023
190328-36B	23	818.602	17.4541	14832.4	26.3182	1.36152	9420.46	0.635129	190328-36B	64.574	6.75896
190328-37A	11	5939.64	55.2432	214579	47.1	2.43663	65179.8	0.303757	190328-37A	90.139	9.43485
190328-37B	0	NaN	NaN	NaN	NaN	NaN	0	0	190328-37B	91.714	9.5997
190328-38A	6	5144.6	70.4435	283310	121.2	6.27005	46940.4	0.165686	190328-38A	100.84	10.5549
190328-39A	20	3480.77	18.8505	65370.7	22	1.13813	56160.7	0.859111	190328-39A	99.809	10.447
190328-40A	22	2865.94	24.0482	65849.6	30.9048	1.5988	40004.6	0.607514	190328-40A	83.38	8.72738
190328-40B	12	3444.54	39.711	114943	48.9091	2.53022	38088.7	0.331371	190328-40B	84.584	8.85341
190328-42A	14	3721.91	19.1284	69277.7	24.5385	1.26945	55141	0.795941	190328-42A	81.336	8.51344
190328-42B	10	3671.82	17.0026	64048.4	36.3333	1.87963	36413.4	0.568529	190328-42B	78.825	8.25061
190328-43A	19	3029.96	19.3247	57775	34.0556	1.7618	30312.9	0.524671	190328-43A	86.553	9.0595
190328-43B	22	2482.01	23.7723	58290.1	32.2857	1.67024	35412.1	0.607514	190328-43B	88.977	9.31322
190328-45A	34	3584.23	14.7525	53299.4	20.0303	1.03623	50042	0.938886	190328-45A	89.89	9.40879
190328-45B	27	4472.42	18.0057	84291.8	24.3846	1.26149	62846.7	0.745586	190328-45B	87.834	9.19358
190328-46A	21	3090.56	21.7235	62961.4	31.3	1.61924	36511.3	0.5799	190328-46A	75.617	7.91483
190328-46B	0	NaN	NaN	NaN	NaN	NaN	0	0	190328-46B	93.944	9.83312
190328-46C	20	2206.35	29.1622	64564.9	34.8947	1.80521	35658.3	0.552286	190328-46C	72.084	7.54503
190328-46D	0	NaN	NaN	NaN	NaN	NaN	0	0	190328-46D	68.69	7.18978
190328-46E	1	13733.6	35.9347	493512	NaN	NaN	17344.7	0.0351455	190328-46E	99.325	10.3963
190328-46G	17	5730.83	36.2188	177135	38.75	2.00466	83154.7	0.469443	190328-46G	97.741	10.2306
190328-47A	33	6784.34	18.6746	127892	20.6562	1.06861	116544	0.911271	190328-47A	94.202	9.86012
190328-47B	0	NaN	NaN	NaN	NaN	NaN	0	0	190328-47B	93.948	9.83354
190328-47C	10	3123.61	44.2304	119125	73	3.77651	32895.5	0.276143	190328-47C	82.659	8.65192
190328-47D	0	NaN	NaN	NaN	NaN	NaN	0	0	190328-47D	87.309	9.13863
190328-47E	31	4586.86	19.0531	86182	22.1	1.1433	73775.4	0.856043	190328-47E	89.179	9.33437
190328-48A	8	3346.9	64.6175	161635	82	4.24211	35707.5	0.220914	190328-48A	105.76	11.0699
190328-49A	14	3548.75	25.6879	86204.5	35.4615	1.83453	46657.3	0.54124	190328-49A	95.005	9.94417
190328-49B	14	2470.12	28.9852	62464.1	30.7692	1.59179	33808.1	0.54124	190328-49B	92.448	9.67653
190328-50A	12	5574.94	55.8504	301708	49.0909	2.53962	99977.3	0.331371	190328-50A	120.395	12.6017
190328-50B	11	6537.66	37.7126	209168	56.3	2.91257	63536.3	0.303757	190328-50B	115.653	12.1054
190328-51A	10	2938.8	50.6747	121896	70	3.62131	33660.8	0.276143	190328-51A	97.978	10.2554
190328-51B	5	2638.18	73.631	140039	106.25	5.49664	19335.3	0.138071	190328-51B	97.568	10.2124
190328-51C	7	2767.7	70.1429	190776	77.6667	4.01793	51627.9	0.27062	190328-51C	110.985	11.6168
190328-51D	7	2328.69	27.174	58509.2	54.5	2.81945	15833.8	0.27062	190328-51D	111.263	11.6459
190328-52A	12	2021.09	48.1573	84369	59	3.05225	27957.5	0.331371	190328-52A	93.681	9.80559
190328-52B	25	4007.09	19.2119	77476.6	25.875	1.33859	53486.5	0.690357	190328-52B	92.564	9.68867
190328-52C	17	4255.9	20.5606	78406	41.6875	2.15662	36807.2	0.469443	190328-52C	89.595	9.37791
190328-52D	14	2353.92	33.5081	65360.2	45.6923	2.3638	25268.3	0.3866	190328-52D	87.065	9.11309
190328-52E	31	1682.21	14.5177	24763.3	21.6667	1.12088	21198.5	0.856043	190328-52E	76.053	7.96047
190328-52F	0	NaN	NaN	NaN	NaN	NaN	0	0	190328-52F	78.477	8.21419
190328-53A	8	4086.46	56.0365	176198	62.5714	3.23701	38924.5	0.220914	190328-53A	103.78	10.8627
190328-53B	8	4043.74	67.6345	238855	78.4286	4.05735	52766.5	0.220914	190328-53B	107.678	11.2707
190328-54A	9	5521.6	55.857	314513	79.875	4.13218	78165.4	0.248529	190328-54A	99.974	10.4643
190328-54B	19	6210.72	32.575	207290	33.7222	1.74455	108759	0.524671	190328-54B	104.889	10.9787
190328-55A	24	7073.53	24.3557	164457	24.4783	1.26634	108993	0.662743	190328-55A	103.319	10.8144
190328-55B	28	7249.95	23.0383	166098	21.3333	1.10364	128427	0.7732	190328-55B	104.44	10.9317
190328-66A	1	1587.58	16.3268	25920.1	NaN	NaN	715.766	0.0276143	190328-66A	44.84	4.6934
190328-66B	1	2416.43	17.3192	41850.6	NaN	NaN	1155.68	0.0276143	190328-66B	44.852	4.69466
190328-67A	22	2963.54	21.1315	57020.7	28.5238	1.47562	34640.9	0.607514	190328-67A	83.241	8.71284
190328-69A	23	3376.2	28.7927	93143.7	26.9091	1.39209	59158.2	0.635129	190328-69A	70.101	7.33747
190328-69B	29	2027.3	19.5391	40334.5	24.0357	1.24344	32300.5	0.800814	190328-69B	70.709	7.40111
211015-01A	13	235.481	44.8462	10576.3	46	2.37972	4429.52	0.418817	211015-01A	25.479	2.6668
211015-01B	1	229.69	364	83607.3	NaN	NaN	2693.55	0.0322167	211015-01B	23.972	2.50907
211015-01C	1	3487.37	68.0079	237169	NaN	NaN	7640.78	0.0322167	211015-01C	81.471	8.5273
211015-01D	0	NaN	NaN	NaN	NaN	NaN	0	0	211015-01D	83.063	8.69393
211015-01E	1	2636.23	17.4728	46062.4	NaN	NaN	1483.98	0.0322167	211015-01E	77.335	8.0944
211015-01F	0	NaN	NaN	NaN	NaN	NaN	0	0	211015-01F	77.863	8.14966
211015-02A	3	1611.62	70.9507	103980	97.5	5.04397	10049.7	0.09665	211015-02A	66.654	6.97645
211015-02B	0	NaN	NaN	NaN	NaN	NaN	0	0	211015-02B	65.325	6.83735
211015-02C	0	NaN	NaN	NaN	NaN	NaN	0	0	211015-02C	55.501	5.8091
211015-02D	0	NaN	NaN	NaN	NaN	NaN	0	0	211015-02D	55.01	5.75771
211015-03A	0	NaN	NaN	NaN	NaN	NaN	0	0	211015-03A	91.813	9.60976
211015-03B	2	2305.06	128.515	261853	369	19.0895	16872.1	0.0644333	211015-03B	90.175	9.43832
211015-03C	11	1778.31	36.3592	61660.7	48.4	2.50388	21851.5	0.354383	211015-03C	85.484	8.94733
211015-03D	0	NaN	NaN	NaN	NaN	NaN	0	0	211015-03D	85.562	8.95549
211015-04A	0	NaN	NaN	NaN	NaN	NaN	0	0	211015-04A	63.18	6.61284
211015-04B	3	2475.88	30.8403	76680.5	130.5	6.75116	7411.17	0.09665	211015-04B	64.744	6.77654
211015-04C	0	NaN	NaN	NaN	NaN	NaN	0	0	211015-04C	69.703	7.29558
211015-04D	4	5594.97	66.2247	350167	134	6.93223	45124.9	0.128867	211015-04D	67.613	7.07683
211015-05A	1	2302.92	455	1.04783e+06	NaN	NaN	33757.5	0.0322167	211015-05A	82.279	8.61187
211015-05B	1	2489.7	140	348558	NaN	NaN	11229.4	0.0322167	211015-05B	84.758	8.87134
211015-05C	0	NaN	NaN	NaN	NaN	NaN	0	0	211015-05C	69.482	7.27245
211015-05D	0	NaN	NaN	NaN	NaN	NaN	0	0	211015-05D	69.535	7.278
211015-05E	2	1940.75	225	449343	93	4.81117	28952.7	0.0644333	211015-05E	75.247	7.87585
211015-05F	5	5372.74	62.4004	337424	80.75	4.17744	54353.4	0.161083	211015-05F	73.987	7.74397
211015-05G	9	5261.2	38.9334	181097	62.25	3.22038	52509	0.28995	211015-05G	110.54	11.5699
211015-06A	1	3278.14	35.9968	118003	NaN	NaN	3801.65	0.0322167	211015-06A	78.276	8.19289
211015-06B	18	3814.92	24.2308	93078	33.4706	1.73154	53975.9	0.5799	211015-06B	71.999	7.5359
211015-06C	12	4918.23	22.377	93151.9	44.9091	2.32328	36012.5	0.3866	211015-06C	77.596	8.12171
211015-06D	0	NaN	NaN	NaN	NaN	NaN	0	0	211015-06D	76.987	8.05797
211015-06E	17	7254.46	21.2812	152514	31.8125	1.64576	83529.5	0.547683	211015-06E	93.185	9.75336
211015-06F	13	3073.37	18.8867	56463.7	45.0833	2.3323	23648	0.418817	211015-06F	97.012	10.1539
211015-06G	2	1246.35	111.753	136861	494	25.5561	8818.38	0.0644333	211015-06G	35.92	3.75963
211015-07A	0	NaN	NaN	NaN	NaN	NaN	0	0	211015-07A	84.196	8.81251
211015-07B	6	7547.25	24.4967	195624	38.6	1.9969	37814.1	0.1933	211015-07B	85.993	9.0006
211015-07C	2	4033.27	59.429	238132	134	6.93223	15343.6	0.0644333	211015-07C	78.572	8.22387
211015-07D	0	NaN	NaN	NaN	NaN	NaN	0	0	211015-07D	78.528	8.21926
211015-07E	18	4382.58	21.9892	96406	32.3529	1.67372	55905.9	0.5799	211015-07E	82.461	8.63092
211015-07F	2	2270.32	164.175	289695	332	17.1754	18666	0.0644333	211015-07F	81.901	8.5723
211015-08A	1	3757.76	28.5325	107218	NaN	NaN	3454.21	0.0322167	211015-08A	74.705	7.81912
211015-08B	1	2454.88	33.4755	82178.6	NaN	NaN	2647.52	0.0322167	211015-08B	74.361	7.78312
211015-08C	0	NaN	NaN	NaN	NaN	NaN	0	0	211015-08C	69.734	7.29883
211015-08D	3	1741.41	107.047	127717	208.5	10.7863	12343.9	0.09665	211015-08D	68.674	7.18788
211015-08E	13	2744.96	20.0099	54832.1	45.6667	2.36248	22964.6	0.418817	211015-08E	85.659	8.96564
211015-08F	20	3966.66	19.7745	78074.6	28.4211	1.47031	50306.1	0.644333	211015-08F	84.671	8.86223
211015-09A	0	NaN	NaN	NaN	NaN	NaN	0	0	211015-09A	65.054	6.80899
211015-09B	0	NaN	NaN	NaN	NaN	NaN	0	0	211015-09B	63.139	6.60855
211015-09C	4	4463.4	70.9917	243174	144	7.44956	31337	0.128867	211015-09C	95.621	10.0083
211015-09D	9	5583.01	31.3585	162436	62.75	3.24625	47098.2	0.28995	211015-09D	92.805	9.71359
211015-09E	14	8175.22	18.4494	151300	42.6923	2.2086	68241.5	0.451033	211015-09E	113.772	11.9081
211015-09F	10	8825.79	25.5472	221261	43.7778	2.26476	71282.9	0.322167	211015-09F	114.208	11.9538
211015-10C	4	2055.26	92.4893	180225	109.667	5.67339	23225	0.128867	211015-10C	82.229	8.60664
211015-10D	0	NaN	NaN	NaN	NaN	NaN	0	0	211015-10D	83.779	8.76887
211015-10E	0	NaN	NaN	NaN	NaN	NaN	0	0	211015-10E	84.528	8.84726
211015-19A	1	3710.88	59.5678	221049	NaN	NaN	7121.45	0.0322167	211015-19A	80.958	8.4736
211015-19B	3	1151.71	154.846	154420	96	4.96637	14924.7	0.09665	211015-19B	80.184	8.39259
211015-20A	1	1467.91	400	587164	NaN	NaN	18916.5	0.0322167	211015-20A	67.526	7.06772
211015-20B	13	2857.36	40.0636	112115	42.8333	2.2159	46955.6	0.418817	211015-20B	65.665	6.87294
211015-21A	0	NaN	NaN	NaN	NaN	NaN	0	0	211015-21A	30.971	3.24163
211015-21B	1	393.262	232	91236.8	NaN	NaN	2939.34	0.0322167	211015-21B	30.411	3.18302
211015-22A	1	3885.14	19.0471	74000.9	NaN	NaN	2384.06	0.0322167	211015-22A	95.733	10.0201
211015-22B	0	NaN	NaN	NaN	NaN	NaN	0	0	211015-22B	100.959	10.567
211015-23A	1	4499.28	26.062	117260	NaN	NaN	3777.74	0.0322167	211015-23A	94.576	9.89895
211015-23B	1	3329.9	30	99897	NaN	NaN	3218.35	0.0322167	211015-23B	95.012	9.94459
211015-23C	0	NaN	NaN	NaN	NaN	NaN	0	0	211015-23C	49.052	5.13411
211015-23D	0	NaN	NaN	NaN	NaN	NaN	0	0	211015-23D	47.02	4.92143
211015-24A	0	NaN	NaN	NaN	NaN	NaN	0	0	211015-24A	61.009	6.38561
211015-24B	0	NaN	NaN	NaN	NaN	NaN	0	0	211015-24B	66.535	6.964
211015-25A	5	6632.24	12.6873	84069.8	130	6.7253	13542.2	0.161083	211015-25A	126.418	13.2318
211015-25B	4	4288.94	14.856	63349.8	62	3.20745	8163.68	0.128867	211015-25B	123.059	12.8802
211015-26A	0	NaN	NaN	NaN	NaN	NaN	0	0	211015-26A	98.065	10.2641
211015-26B	0	NaN	NaN	NaN	NaN	NaN	0	0	211015-26B	97.682	10.224
211015-27A	16	5087.42	22.1191	97721.7	34.8	1.80031	50372.3	0.515467	211015-27A	109.826	11.4951
211015-27B	14	2371.33	17.6489	42368.7	41.7692	2.16085	19109.7	0.451033	211015-27B	111.688	11.69
211015-28A	3	5117.28	42.9148	192925	47.5	2.45732	18646.2	0.09665	211015-28A	91.911	9.62002
211015-28B	0	NaN	NaN	NaN	NaN	NaN	0	0	211015-28B	90.774	9.50101
211015-28C	25	6338.7	16.999	105685	24.0417	1.24375	85120.8	0.805417	211015-28C	89.585	9.37656
211015-28D	1	1459.68	15.0788	22010.3	NaN	NaN	709.098	0.0322167	211015-28D	81.266	8.50584
211015-29A	1	338.316	208	70369.6	NaN	NaN	2267.08	0.0322167	211015-29A	22.292	2.33323
211015-29B	0	NaN	NaN	NaN	NaN	NaN	0	0	211015-29B	21.861	2.28812
211015-29C	0	NaN	NaN	NaN	NaN	NaN	0	0	211015-29C	78.581	8.22481
211015-29D	1	1069.48	449	480197	NaN	NaN	15470.4	0.0322167	211015-29D	72.211	7.55808
211015-30A	3	3491.55	46.3452	126273	221	11.433	12204.3	0.09665	211015-30A	84.318	8.82528
211015-30B	1	2507.97	27.3825	68674.4	NaN	NaN	2212.46	0.0322167	211015-30B	83.672	8.75767
211015-41A	36	3957.42	15.7786	62317.3	16.7714	0.867637	72275.7	1.1598	211015-41A	68.578	7.17783
211015-41B	2	2028.03	89.3052	128821	302	15.6234	8300.4	0.0644333	211015-41B	70.581	7.38748
211015-42A	18	3828.15	19.6938	67797.4	31.5294	1.63111	39315.7	0.5799	211015-42A	77.377	8.09879
211015-42B	4	1927.62	106.619	166595	79.6667	4.1214	21468.5	0.128867	211015-42B	78.136	8.17823
211015-43A	1	2996.93	20.1259	60315.9	NaN	NaN	1943.18	0.0322167	211015-43A	83.062	8.69382
211015-43B	1	1125.2	101.029	113677	NaN	NaN	3662.3	0.0322167	211015-43B	86.714	9.07607
211015-43C	2	817.659	23.6605	19325.9	26	1.34506	1245.23	0.0644333	211015-43C	65.218	6.82615
211015-43D	0	NaN	NaN	NaN	NaN	NaN	0	0	211015-43D	63.132	6.60782
211015-43E	1	675.949	18.9947	12839.4	NaN	NaN	413.644	0.0322167	211015-43E	102.282	10.7055
211015-43F	13	2012.22	21.2965	41614.1	37.5833	1.9443	17428.7	0.418817	211015-43F	103.256	10.8075
211015-44A	12	1874.34	36.2094	64617.3	43.2727	2.23863	24981.1	0.3866	211015-44A	80.197	8.39395
211015-44B	6	2828.82	36.8088	80277.6	65.2	3.373	15517.7	0.1933	211015-44B	80.045	8.37804
211015-46A	0	NaN	NaN	NaN	NaN	NaN	0	0	211015-46A	80.942	8.47193
211015-46B	0	NaN	NaN	NaN	NaN	NaN	0	0	211015-46B	81.48	8.52824
211015-46C	2	3526.01	37.6594	121544	218	11.2778	7831.51	0.0644333	211015-46C	111.012	11.6193
211015-47A	8	5380.8	19.8946	106688	62.2857	3.22223	27497.2	0.257733	211015-47A	100.269	10.4948
211015-47B	15	5746.9	17.2713	97336.2	24.2143	1.25268	70556.6	0.724875	211015-47B	99.557	10.4203
211015-47C	1	2546.81	22.647	57677.7	NaN	NaN	1858.18	0.0322167	211015-47C	89.981	9.41801
211015-47D	1	2234.08	24.3175	54327.3	NaN	NaN	1750.24	0.0322167	211015-47D	91.324	9.55858
211015-47E	5	1350.78	91.6366	113618	67.75	3.50491	18301.9	0.161083	211015-47E	98.424	10.3017
211015-48A	0	NaN	NaN	NaN	NaN	NaN	0	0	211015-48A	112.22	11.7457
211015-48B	5	978.275	80.7332	80888.5	91.25	4.72064	13029.8	0.161083	211015-48B	109.122	11.4214
211015-48C	1	1684.34	352.369	593509	NaN	NaN	19120.9	0.0322167	211015-48C	89.028	9.31826
211015-48D	0	NaN	NaN	NaN	NaN	NaN	0	0	211015-48D	90.655	9.48856
211015-49A	0	NaN	NaN	NaN	NaN	NaN	0	0	211015-49A	79.268	8.29672
211015-49B	2	1964.13	172.783	226856	88	4.55251	14617.1	0.0644333	211015-49B	82.066	8.58957
211015-50A	0	NaN	NaN	NaN	NaN	NaN	0	0	211015-50A	93.097	9.74415
211015-50B	3	2172.66	159.482	353532	151	7.81169	34168.8	0.09665	211015-50B	95.046	9.94815
221004-01A	0	NaN	NaN	NaN	NaN	NaN	0	0	221004-01A	49.513	5.18236
221004-01B	0	NaN	NaN	NaN	NaN	NaN	0	0	221004-01B	53.579	5.60794
221004-02A	6	2865.33	23.1436	65607.3	62.6	3.24857	12642.5	0.1927	221004-02A	59.701	6.2487
221004-02B	0	NaN	NaN	NaN	NaN	NaN	0	0	221004-02B	61.899	6.47876
221004-03A	0	NaN	NaN	NaN	NaN	NaN	0	0	221004-03A	87.773	9.18691
221004-03B	2	8405.32	39.9925	335395	33	1.71251	21543.5	0.0642333	221004-03B	84.647	8.85972
221004-04A	6	3351.98	77.4255	221838	106.6	5.53191	42748.2	0.1927	221004-04A	43.649	4.5686
221004-04B	4	1019.71	137.75	148442	147	7.62844	19069.8	0.128467	221004-04B	42.936	4.49397
221004-05A	1	10929.6	22.1173	241733	NaN	NaN	7763.66	0.0321167	221004-05A	52.975	5.54472
221004-05B	17	4458.53	17.2318	73250.9	32.9375	1.70926	39993.8	0.545983	221004-05B	54.029	5.65504
221004-16A	1	7846.09	20.6476	162003	NaN	NaN	5203	0.0321167	221004-16A	88.58	9.27137
221004-16B	0	NaN	NaN	NaN	NaN	NaN	0	0	221004-16B	85.306	8.92869
221004-17A	0	NaN	NaN	NaN	NaN	NaN	0	0	221004-17A	112.531	11.7782
221004-17B	0	NaN	NaN	NaN	NaN	NaN	0	0	221004-17B	113.484	11.878
221004-18A	0	NaN	NaN	NaN	NaN	NaN	0	0	221004-18A	89.629	9.38117
221004-18B	0	NaN	NaN	NaN	NaN	NaN	0	0	221004-18B	87.901	9.2003
221004-19A	1	3346.2	12.1432	40633.5	NaN	NaN	1305.01	0.0321167	221004-19A	81.326	8.51212
221004-19B	0	NaN	NaN	NaN	NaN	NaN	0	0	221004-19B	81.348	8.51442
221018-02A	16	4544.25	25.1015	106872	39.8	2.06218	50772.4	0.475077	221018-02A	62.614	6.5536
221018-02B	1	2948.47	30.7864	90772.9	NaN	NaN	2695.26	0.0296923	221018-02B	62.175	6.50765
221018-03A	19	1656.45	25.0275	39834	34.5556	1.79044	22472.5	0.564154	221018-03A	72.012	7.53726
221018-03B	5	1229.63	73.4885	70694.7	99	5.12953	10495.4	0.148462	221018-03B	72.434	7.58143
221018-04A	2	3889.1	88.0158	270600	112	5.80311	16069.5	0.0593846	221018-04A	45.657	4.77877
221018-04B	1	1620.69	34.1522	55350.1	NaN	NaN	1643.47	0.0296923	221018-04B	44.233	4.62972
221018-05A	19	940.651	27.0826	25941.8	33.6667	1.74439	14635.2	0.564154	221018-05A	66.067	6.91501
221018-05B	1	1356.85	224	303934	NaN	NaN	9024.49	0.0296923	221018-05B	64.869	6.78962
221018-16A	0	NaN	NaN	NaN	NaN	NaN	0	0	221018-16A	94.812	9.92366
221018-16B	11	2830.65	37.2633	99245.5	51.8	2.68394	32415.1	0.326615	221018-16B	92.586	9.69067
221018-17A	0	NaN	NaN	NaN	NaN	NaN	0	0	221018-17A	84.467	8.84088
221018-17B	0	NaN	NaN	NaN	NaN	NaN	0	0	221018-17B	82.911	8.67802
221018-18A	0	NaN	NaN	NaN	NaN	NaN	0	0	221018-18A	103.519	10.835
221018-18B	1	2640.78	20.1764	53281.4	NaN	NaN	1582.05	0.0296923	221018-18B	101.645	10.6388
221018-19A	2	8528.95	16.1689	133901	130	6.73575	7951.68	0.0593846	221018-19A	97.117	10.1649
221018-19B	0	NaN	NaN	NaN	NaN	NaN	0	0	221018-19B	98.763	10.3372
221018-20A	4	5446.01	43.9281	151957	100.667	5.21589	18047.8	0.118769	221018-20A	110.435	11.5589
221018-31A	0	NaN	NaN	NaN	NaN	NaN	0	0	221018-31A	45.2	4.73093
221018-31B	9	653.36	30.2073	15551.1	57	2.95337	4155.72	0.267231	221018-31B	44.959	4.70571
221018-32A	4	1920.84	69.3758	113071	95.6667	4.95682	13429.3	0.118769	221018-32A	46.508	4.86784
221018-32B	1	2190.65	551	1.20705e+06	NaN	NaN	35840	0.0296923	221018-32B	44.464	4.6539
221018-33A	11	4871.59	40.5236	149398	63	3.26425	48795.7	0.326615	221018-33A	57.153	5.98201
221018-33B	12	4072.77	46.8279	181621	50.4545	2.61423	64712.8	0.356308	221018-33B	55.834	5.84396
221018-34A	4	3662.69	47.9059	152422	131.667	6.82211	18103.1	0.118769	221018-34A	56.614	5.9256
221018-34B	6	2115.79	53.758	110590	43.4	2.2487	19702.1	0.178154	221018-34B	56.868	5.95218
221018-35A	18	4419.79	22.3725	85576.9	37.2941	1.93234	45737.6	0.534462	221018-35A	66.911	7.00335
221018-35B	1	1712.52	621	1.06347e+06	NaN	NaN	31576.9	0.0296923	221018-35B	65.816	6.88874
221020-01A	3	9168.12	67.7946	435839	250	12.9534	38823.2	0.0890769	221020-01A	71.495	7.48314
221020-01B	6	5031.34	56.259	214593	87.6	4.53886	38230.6	0.178154	221020-01B	69.529	7.27737
221020-02A	0	NaN	NaN	NaN	NaN	NaN	0	0	221020-02A	42.017	4.39778
221020-02B	11	2095.06	46.5807	84020.9	49.9	2.58549	27442.5	0.326615	221020-02B	43.238	4.52558
221020-03A	12	6301	28.6048	159844	49	2.53886	56953.8	0.356308	221020-03A	62.712	6.56386
221020-03B	11	9393.72	17.1726	162115	57.3	2.96891	52949.3	0.326615	221020-03B	61.136	6.3989
221020-04A	4	12165.8	19.4609	236785	151	7.82383	28122.8	0.118769	221020-04A	81.408	8.5207
221020-04B	15	6788.24	26.6885	172987	38.4286	1.99112	77045.5	0.445385	221020-04B	85.508	8.94984
221020-05A	1	1217.09	104	126577	NaN	NaN	3758.37	0.0296923	221020-05A	54.972	5.75374
221020-05B	0	NaN	NaN	NaN	NaN	NaN	0	0	221020-05B	53.222	5.57057
221020-06A	19	4794.13	31.0689	144182	33.0556	1.71272	81340.9	0.564154	221020-06A	66.907	7.00293
221020-06B	19	2915.48	24.7905	69012.7	32.6667	1.69257	38933.8	0.564154	221020-06B	63.914	6.68967
221020-07A	18	4354.96	22.5674	97328.8	36.3529	1.88357	52018.5	0.534462	221020-07A	64.343	6.73457
221020-07B	12	5890.12	37.7695	210318	49.7273	2.57654	74937.9	0.356308	221020-07B	63.679	6.66507
221020-08A	7	5585.66	43.0771	197402	90.6667	4.69775	41029.1	0.207846	221020-08A	63.763	6.67386
221020-08B	13	4305.81	18.2672	77623.8	44.8333	2.32297	29962.8	0.386	221020-08B	60.489	6.33118
221020-09A	22	6721.95	19.4334	119061	29.4286	1.5248	77774.3	0.653231	221020-09A	74.585	7.80656
221020-10A	2	7951.95	28.3848	235451	136	7.04663	13982.2	0.0593846	221020-10A	75.833	7.93719
221020-10B	2	8711.27	21.0773	184960	572	29.6373	10983.8	0.0593846	221020-10B	77.051	8.06467
221020-40B	1	6265.78	16.3722	102584	NaN	NaN	3045.97	0.0296923	221020-40B	56.986	5.96453
221020-41A	0	NaN	NaN	NaN	NaN	NaN	0	0	221020-41A	70.309	7.35901
221020-41B	26	2469.22	16.2975	40628	24.44	1.26632	31364.8	0.772	221020-41B	82.822	8.6687
221020-42A	8	4058.35	19.0977	76165.2	71.4286	3.70096	18092.2	0.237538	221020-42A	52.101	5.45324
221020-42B	4	6386.52	97.2524	528590	129	6.68394	62780.2	0.118769	221020-42B	52.078	5.45083
221020-43A	12	2647.62	42.4778	105791	45.1818	2.34103	37694.1	0.356308	221020-43A	38.578	4.03783
221020-43B	0	NaN	NaN	NaN	NaN	NaN	0	0	221020-43B	40.602	4.24968
221020-44A	0	NaN	NaN	NaN	NaN	NaN	0	0	221020-44A	82.496	8.63458
221020-44B	6	1931.55	72.8839	120136	110.6	5.73057	21402.7	0.178154	221020-44B	79.453	8.31608
221020-45A	21	1844.45	26.8004	48280.1	29.15	1.51036	30104.5	0.623538	221020-45A	89.192	9.33543
ppr2
Name	Num of Peaks	Peak height (mean)	Peak width (mean)	Peak area (mean)	Peak interval (mean, px)	Peak interval (mean, s)	Total peak itensity (calcium amount)	Frequency	Name	Length	Length (um)
190328-01A	9	2091.22	52.4802	92734.6	60.875	3.14925	23047.2	0.248529	190328-01A	59.79	6.25822
190328-01B	10	2193.27	23.8752	47915.4	72.8889	3.77077	13231.5	0.276143	190328-01B	60.502	6.33274
190328-02A	20	1606.02	8.65757	15269.3	28.7368	1.48664	8433.01	0.552286	190328-02A	49.575	5.18902
190328-02B	23	609.606	22.2624	12257.7	29.2727	1.51437	7785.24	0.635129	190328-02B	52.662	5.51213
190328-02C	0	NaN	NaN	NaN	NaN	NaN	0	0	190328-02C	49.812	5.21382
190328-02D	15	1293.74	38.4186	46538.6	44.7143	2.31321	19276.9	0.414214	190328-02D	50.694	5.30614
190328-02E	12	563.537	35.2215	17080.3	44.4545	2.29977	5659.91	0.331371	190328-02E	56.706	5.93542
190328-02F	0	NaN	NaN	NaN	NaN	NaN	0	0	190328-02F	54.234	5.67667
190328-03A	1	834.36	485.905	405420	NaN	NaN	11195.4	0.0276143	190328-03A	23.432	2.45263
190328-03B	1	909.113	71.2009	64729.7	NaN	NaN	1787.46	0.0276143	190328-03B	21.721	2.27354
190328-03C	11	1936.77	35.254	50838.9	63.5	3.28505	15442.7	0.303757	190328-03C	28.504	2.98351
190328-03D	14	601.769	49.7143	29696.8	47.4615	2.45533	11480.8	0.3866	190328-03D	25.031	2.61999
190328-04A	9	1584.9	42.2391	49729	79.625	4.11924	12359.1	0.248529	190328-04A	43.27	4.52907
190328-04B	10	2290.8	53.313	95960.4	71.7778	3.71328	26498.8	0.276143	190328-04B	41.714	4.3662
190328-05A	0	NaN	NaN	NaN	NaN	NaN	0	0	190328-05A	41.309	4.32381
190328-05B	9	1105.23	71.27	68889.7	83	4.29384	17121.1	0.248529	190328-05B	44.786	4.68775
190328-06A	2	1437.15	279.982	364254	241	12.4677	20117.2	0.0552286	190328-06A	55.218	5.77967
190328-06B	12	2134.09	29.8696	59899.6	35.4545	1.83417	19849	0.331371	190328-06B	52.627	5.50847
190328-07A	9	1047.91	56.2882	36011.8	73.5	3.80238	8949.96	0.248529	190328-07A	54.633	5.71844
190328-07B	17	855.896	27.2879	21237.3	37.5	1.93999	9969.72	0.469443	190328-07B	52.733	5.51956
190328-08A	17	3061.86	15.2883	46855.7	33.5625	1.73629	21996.1	0.469443	190328-08A	44.553	4.66336
190328-08B	12	1934.83	37.6526	53722.8	59.8182	3.09458	17802.2	0.331371	190328-08B	40.588	4.24835
190328-09A	1	1865.79	22.0681	41174.5	NaN	NaN	1137.01	0.0276143	190328-09A	52.448	5.48973
190328-09B	1	2075.73	31.6614	65720.3	NaN	NaN	1814.82	0.0276143	190328-09B	51.935	5.43604
190328-10A	1	3514.45	14.5633	51182	NaN	NaN	1413.35	0.0276143	190328-10A	47.62	4.98439
190328-10B	13	444.365	51.3846	23437.5	49	2.53492	8413.74	0.358986	190328-10B	46.643	4.88212
190328-25A	13	3577.78	40.0872	123453	56.4167	2.91861	44318	0.358986	190328-25A	101.404	10.614
190328-25B	12	2038.64	36.0992	59352.5	60.8182	3.14631	19667.7	0.331371	190328-25B	107.686	11.2715
190328-26A	11	1709.52	40.5602	44501.8	41.1	2.12623	13517.8	0.303757	190328-26A	65.287	6.83359
190328-26B	6	5926.52	30.4172	146299	42.4	2.19348	24239.6	0.165686	190328-26B	66.659	6.9772
190328-26C	18	5559.04	22.1988	97922.1	40.0588	2.07237	48672.9	0.497057	190328-26C	88.01	9.21201
190328-26D	22	3572.71	13.0568	47769	25	1.29333	29020.4	0.607514	190328-26D	85.682	8.96833
190328-27A	19	2372.51	13.9501	31491.7	19.8333	1.02604	28914.9	0.918175	190328-27A	91.471	9.57427
190328-27B	36	3883.23	17.7033	69300.5	19.1714	0.991797	68892.6	0.994114	190328-27B	89.368	9.35415
190328-28A	24	4555.06	12.8806	58117.4	28.8696	1.49351	38516.9	0.662743	190328-28A	83.739	8.76496
190328-28B	18	5068.91	22.3994	90457.8	38.2353	1.97803	44962.7	0.497057	190328-28B	84.013	8.79364
190328-28C	22	499.221	23.0247	9822.92	31.4286	1.6259	5967.57	0.607514	190328-28C	86.314	9.03449
190328-28D	24	1160.32	13.0581	15361.1	27.5217	1.42378	10180.4	0.662743	190328-28D	89.066	9.32254
190328-29A	31	1833.46	18.1591	33090.1	21.2667	1.10019	28326.5	0.856043	190328-29A	81.006	8.4789
190328-29B	7	1291.39	86.4423	107911	82.3333	4.25936	20859.1	0.1933	190328-29B	84.918	8.88837
190328-29C	17	6494.22	15.268	89101.5	38.625	1.99819	41828.1	0.469443	190328-29C	85.127	8.91024
190328-29E	28	1088.62	12.326	13310.6	24.2963	1.25692	10291.7	0.7732	190328-29E	69.12	7.23479
190328-30A	0	NaN	NaN	NaN	NaN	NaN	0	0	190328-30A	71.954	7.53143
190328-30B	10	6177.33	25.3743	132414	59.2222	3.06375	36565.3	0.276143	190328-30B	69.913	7.31779
190328-31A	12	2374.42	40.676	80510.4	58.2727	3.01463	26678.8	0.331371	190328-31A	62.124	6.50252
190328-31B	18	1488.48	21.5395	31133.9	38.4706	1.9902	15475.3	0.497057	190328-31B	60.538	6.33651
190328-32A	1	977.248	537	524782	NaN	NaN	14491.5	0.0276143	190328-32A	83.079	8.69588
190328-32B	7	3288.77	35.1695	102372	66.8333	3.45749	19788.4	0.1933	190328-32B	80.725	8.44949
190328-32C	14	1649.67	40.3534	61555.2	49.3077	2.55084	23797.2	0.3866	190328-32C	76.927	8.05195
190328-32D	19	897.669	34.5312	28858.1	37.0556	1.917	15141	0.524671	190328-32D	79.897	8.36282
190328-32E	11	1328.73	45.8684	51292.8	56.6	2.92809	15580.5	0.303757	190328-32E	71.518	7.48579
190328-32F	1	1758.35	18.3498	32265.3	NaN	NaN	890.983	0.0276143	190328-32F	70.902	7.42131
190328-33A	26	1610.64	16.786	25687.1	26.16	1.35334	18442.6	0.717971	190328-33A	63.959	6.69459
190328-33B	16	1419.11	41.2534	54912.9	45.8667	2.37282	24262.1	0.441829	190328-33B	63.715	6.66905
190328-33C	0	NaN	NaN	NaN	NaN	NaN	0	0	190328-33C	79.289	8.29918
190328-33D	0	NaN	NaN	NaN	NaN	NaN	0	0	190328-33D	78.62	8.22916
190328-33E	23	2278.84	26.387	55771.6	29.6364	1.53318	35422.2	0.635129	190328-33E	87.02	9.10838
190328-34A	5	1674.74	135.2	222214	98.5	5.09571	30681.4	0.138071	190328-34A	81.706	8.55217
190328-34B	1	2077.78	100.695	209222	NaN	NaN	5777.51	0.0276143	190328-34B	80.041	8.37789
190328-34C	4	7059.29	18.2222	135598	38.6667	2.00034	14977.8	0.110457	190328-34C	70.25	7.35307
190328-34D	17	3256.42	25.4028	65176.9	36.6875	1.89796	30596.8	0.469443	190328-34D	72.131	7.54995
190328-34E	0	NaN	NaN	NaN	NaN	NaN	0	0	190328-34E	79.179	8.28767
190328-34F	27	3003.88	19.725	67485.8	24.6923	1.27741	50316.5	0.745586	190328-34F	80.105	8.38459
190328-35A	27	3423.65	23.8683	77875.2	24.0385	1.24358	58062.6	0.745586	190328-35A	88.203	9.23221
190328-35B	1	1864.34	277.726	517775	NaN	NaN	14298	0.0276143	190328-35B	86.574	9.0617
190328-35C	26	2250.96	16.9333	38481.8	24.4	1.26229	27628.8	0.717971	190328-35C	62.351	6.52628
190328-35D	21	815.642	28.3727	21343.6	31.5	1.62959	12377.2	0.5799	190328-35D	52.972	5.54458
190328-35E	15	1323.07	30.7972	35732	40.8571	2.11366	14800.7	0.414214	190328-35E	56.378	5.90109
190328-56A	20	1615.6	30.9044	45818.9	34.6316	1.7916	25305.1	0.552286	190328-56A	83.237	8.71242
190328-56B	11	1831.26	36.7255	48115.1	66.5	3.44025	14615.3	0.303757	190328-56B	85.012	8.89821
190328-57A	19	1090.55	33.3208	33539.5	37.6111	1.94574	17597.2	0.524671	190328-57A	84.126	8.80547
190328-57B	14	938.064	38.7862	30855	41.8462	2.16483	11928.5	0.3866	190328-57B	80.534	8.42949
190328-57C	14	1126.8	36.7132	34707.5	45.2308	2.33993	13417.9	0.3866	190328-57C	90.316	9.45338
190328-57D	9	1647.76	46.6367	63705.3	71.25	3.68598	15832.6	0.248529	190328-57D	90.891	9.51356
190328-58A	13	1422.29	53.7692	74937.3	43	2.22452	26901.4	0.358986	190328-58A	79.302	8.30054
190328-58B	18	1992.05	26.4974	50884.7	39.1765	2.02672	25292.6	0.497057	190328-58B	76.39	7.99574
190328-59A	22	4609.56	17.266	70114.9	29.5714	1.52982	42595.8	0.607514	190328-59A	95.86	10.0337
190328-59B	21	1933.73	30.0052	51479.4	33.8	1.74858	29852.9	0.5799	190328-59B	95.379	9.98332
190328-59C	0	NaN	NaN	NaN	NaN	NaN	0	0	190328-59C	64.636	6.76545
190328-59D	22	681.809	27.4167	17546.3	29.5714	1.52982	10659.6	0.607514	190328-59D	68.778	7.19899
190328-59E	27	3122.63	13.8353	43395.8	18.6154	0.963031	45297.4	1.04382	190328-59E	88.292	9.24152
190328-59F	26	1803.84	12.7245	22829	19.64	1.01604	22946.8	1.00516	190328-59F	87.685	9.17799
190328-60A	19	6279.66	17.5064	98785.1	36.5556	1.89113	51829.7	0.524671	190328-60A	77.94	8.15798
190328-60B	22	2382.73	30.9915	71850.1	32.1905	1.66531	43650	0.607514	190328-60B	78.559	8.22277
190328-61A	12	2522.56	50.171	118469	48.8182	2.52551	39257.3	0.331371	190328-61A	74.332	7.78033
190328-61B	1	5253.6	17.2148	90439.4	NaN	NaN	2497.42	0.0276143	190328-61B	71.109	7.44298
190328-62A	1	1677.28	167.89	281598	NaN	NaN	7776.13	0.0276143	190328-62A	88.286	9.2409
190328-62B	8	2901.15	58.1107	136734	75.1429	3.88737	30206.4	0.220914	190328-62B	84.668	8.8622
190328-63A	0	NaN	NaN	NaN	NaN	NaN	0	0	190328-63A	83.833	8.7748
190328-63B	13	1541.47	35.1895	49443.8	53	2.74185	17749.6	0.358986	190328-63B	84.887	8.88512
190328-63C	27	1755.12	20.9249	35642	26.0769	1.34904	26574.2	0.745586	190328-63C	89.051	9.32097
190328-63E	10	2446.48	58.8099	100099	74.7778	3.86848	27641.6	0.276143	190328-63E	84.265	8.82002
190328-64A	27	2022.18	22.9938	43131.9	25.6154	1.32516	32158.5	0.745586	190328-64A	79.889	8.36198
190328-64B	18	1141.98	19.4215	20185.7	37.2941	1.92934	10033.4	0.497057	190328-64B	77.335	8.09465
190328-65A	27	1828.54	18.0268	28454.6	26.0385	1.34705	21215.3	0.745586	190328-65A	74.357	7.78295
190328-65B	21	1049.16	25.162	22843	31.15	1.61148	13246.6	0.5799	190328-65B	72.616	7.60072
211015-11A	6	3244.53	62.8325	185487	100.2	5.18365	35854.6	0.1933	211015-11A	83.851	8.7764
211015-11B	2	891.046	133.5	118068	90	4.65598	7607.52	0.0644333	211015-11B	82.892	8.67603
211015-11C	0	NaN	NaN	NaN	NaN	NaN	0	0	211015-11C	80.558	8.43174
211015-11D	4	3303.85	21.469	71667.5	147.333	7.622	9235.56	0.128867	211015-11D	78.756	8.24313
211015-11E	0	NaN	NaN	NaN	NaN	NaN	0	0	211015-11E	66.83	6.99487
211015-11F	0	NaN	NaN	NaN	NaN	NaN	0	0	211015-11F	68.164	7.1345
211015-11G	2	2112.8	25.6316	53172.8	84	4.34558	3426.1	0.0644333	211015-11G	96.744	10.1259
211015-12A	0	NaN	NaN	NaN	NaN	NaN	0	0	211015-12A	26.97	2.82286
211015-12B	0	NaN	NaN	NaN	NaN	NaN	0	0	211015-12B	26.685	2.79303
211015-13A	0	NaN	NaN	NaN	NaN	NaN	0	0	211015-13A	28.13	2.94427
211015-13B	8	321.049	68.1382	19112.4	66.4286	3.43655	4925.91	0.257733	211015-13B	26.541	2.77796
211015-14A	0	NaN	NaN	NaN	NaN	NaN	0	0	211015-14A	71.42	7.47529
211015-14B	0	NaN	NaN	NaN	NaN	NaN	0	0	211015-14B	70.932	7.42422
211015-14C	0	NaN	NaN	NaN	NaN	NaN	0	0	211015-14C	81.163	8.49506
211015-14D	0	NaN	NaN	NaN	NaN	NaN	0	0	211015-14D	65.144	6.81841
211015-15A	0	NaN	NaN	NaN	NaN	NaN	0	0	211015-15A	73.206	7.66223
211015-15B	6	1047.64	76.5083	70511.7	88.2	4.56286	13629.9	0.1933	211015-15B	71.633	7.49759
211015-15C	0	NaN	NaN	NaN	NaN	NaN	0	0	211015-15C	73.983	7.74355
211015-15D	0	NaN	NaN	NaN	NaN	NaN	0	0	211015-15D	72.431	7.58111
211015-15E	0	NaN	NaN	NaN	NaN	NaN	0	0	211015-15E	64.596	6.76105
211015-15F	10	696.107	49.6106	33203	55.3333	2.86256	10696.9	0.322167	211015-15F	64.914	6.79433
211015-15G	0	NaN	NaN	NaN	NaN	NaN	0	0	211015-15G	82.563	8.64159
211015-16A	0	NaN	NaN	NaN	NaN	NaN	0	0	211015-16A	77.587	8.12077
211015-16B	0	NaN	NaN	NaN	NaN	NaN	0	0	211015-16B	77.197	8.07995
211015-16C	0	NaN	NaN	NaN	NaN	NaN	0	0	211015-16C	94.068	9.84578
211015-16D	0	NaN	NaN	NaN	NaN	NaN	0	0	211015-16D	96.106	10.0591
211015-16E	7	1688.21	41.4117	61714	84	4.34558	13917.5	0.225517	211015-16E	84.311	8.82455
211015-16F	7	985.068	59.5406	50619.6	54.8333	2.8367	11415.6	0.225517	211015-16F	83.428	8.73213
211015-17A	0	NaN	NaN	NaN	NaN	NaN	0	0	211015-17A	109.99	11.5123
211015-17B	0	NaN	NaN	NaN	NaN	NaN	0	0	211015-17B	110.257	11.5402
211015-17C	0	NaN	NaN	NaN	NaN	NaN	0	0	211015-17C	84.147	8.80739
211015-17D	0	NaN	NaN	NaN	NaN	NaN	0	0	211015-17D	83.954	8.78719
211015-18A	0	NaN	NaN	NaN	NaN	NaN	0	0	211015-18A	57.654	6.03445
211015-18B	0	NaN	NaN	NaN	NaN	NaN	0	0	211015-18B	55.796	5.83998
211015-18C	2	2017.07	51.8945	95749.3	467	24.1593	6169.45	0.0644333	211015-18C	87.735	9.18293
211015-31A	0	NaN	NaN	NaN	NaN	NaN	0	0	211015-31A	99.829	10.4488
211015-31B	0	NaN	NaN	NaN	NaN	NaN	0	0	211015-31B	97.123	10.1655
211015-31C	0	NaN	NaN	NaN	NaN	NaN	0	0	211015-31C	112.968	11.824
211015-31D	0	NaN	NaN	NaN	NaN	NaN	0	0	211015-31D	115.201	12.0577
211015-32A	1	3212.18	25.7341	82662.7	NaN	NaN	2663.12	0.0322167	211015-32A	80.855	8.46282
211015-32B	3	1811.7	65.0518	94154	91.5	4.73357	9099.99	0.09665	211015-32B	81.652	8.54624
211015-33A	1	3876.26	21.9749	85180.3	NaN	NaN	2744.23	0.0322167	211015-33A	96.989	10.1515
211015-33B	0	NaN	NaN	NaN	NaN	NaN	0	0	211015-33B	98.443	10.3037
211015-33C	15	1401.85	23.578	31822.5	33.5	1.73306	15378.2	0.48325	211015-33C	116.106	12.1524
211015-33D	15	2063.94	18.3486	37319.1	29.2857	1.51504	18034.5	0.48325	211015-33D	118.938	12.4488
211015-34A	0	NaN	NaN	NaN	NaN	NaN	0	0	211015-34A	73.15	7.65637
211015-34B	5	1920.17	44.289	70074.9	108.5	5.61304	11287.9	0.161083	211015-34B	69.226	7.24565
211015-35A	0	NaN	NaN	NaN	NaN	NaN	0	0	211015-35A	111.82	11.7038
211015-35B	0	NaN	NaN	NaN	NaN	NaN	0	0	211015-35B	110.633	11.5796
211015-36A	0	NaN	NaN	NaN	NaN	NaN	0	0	211015-36A	36.66	3.83708
211015-36B	0	NaN	NaN	NaN	NaN	NaN	0	0	211015-36B	36.912	3.86346
211015-37A	0	NaN	NaN	NaN	NaN	NaN	0	0	211015-37A	105.445	11.0366
211015-37B	0	NaN	NaN	NaN	NaN	NaN	0	0	211015-37B	102.448	10.7229
211015-38A	9	1735.58	51.8889	90029	46.75	2.41852	26103.9	0.28995	211015-38A	76.371	7.9935
211015-38B	0	NaN	NaN	NaN	NaN	NaN	0	0	211015-38B	76.949	8.054
211015-38C	0	NaN	NaN	NaN	NaN	NaN	0	0	211015-38C	58.181	6.08961
211015-38D	1	716.816	395	283142	NaN	NaN	9121.91	0.0322167	211015-38D	56.623	5.92654
211015-39A	1	2030.78	475	964622	NaN	NaN	31076.9	0.0322167	211015-39A	90.878	9.5119
211015-39B	17	2764.94	17.8285	46276.5	35.375	1.83006	25344.9	0.547683	211015-39B	91.392	9.5657
211015-40A	0	NaN	NaN	NaN	NaN	NaN	0	0	211015-40A	104.604	10.9486
211015-40B	10	1653.67	50.5549	80932.8	53.8889	2.78784	26073.9	0.322167	211015-40B	102.139	10.6905
211015-51A	2	6798.69	18.9173	128904	282	14.5887	8305.73	0.0644333	211015-51A	97.754	10.2316
211015-51B	0	NaN	NaN	NaN	NaN	NaN	0	0	211015-51B	97.6	10.2155
211015-51C	0	NaN	NaN	NaN	NaN	NaN	0	0	211015-51C	95.485	9.9941
211015-51D	1	4150.62	15.44	64085.6	NaN	NaN	2064.62	0.0322167	211015-51D	94.977	9.94093
211015-51E	0	NaN	NaN	NaN	NaN	NaN	0	0	211015-51E	82.663	8.65206
211015-52A	2	2477.71	135.5	334096	178	9.20848	21526.9	0.0644333	211015-52A	85.765	8.97674
211015-52B	4	6607.08	14.1302	93958.7	71	3.67305	12108.1	0.128867	211015-52B	87.423	9.15027
211015-53A	11	4681.55	40.9986	179588	46	2.37972	63642.9	0.354383	211015-53A	96.475	10.0977
211015-53B	10	5224.92	31.0019	137191	44.1111	2.282	44198.2	0.322167	211015-53B	99.61	10.4258
211015-54A	5	4695.63	88.452	317228	21	1.08639	51100.1	0.161083	211015-54A	109.874	11.5001
211015-54B	1	1775.01	428	759702	NaN	NaN	24475.1	0.0322167	211015-54B	107.35	11.236
211015-55A	11	4526.39	20.1707	83630.3	55.8	2.8867	29637.2	0.354383	211015-55A	63.223	6.61734
211015-55B	13	8935.54	17.7774	149794	45.75	2.36679	62736.1	0.418817	211015-55B	61.827	6.47123
211015-56A	4	4582.49	43.411	134419	119.333	6.17348	17322.1	0.128867	211015-56A	77.923	8.15594
211015-56B	4	3879.96	14.0139	53613.4	85	4.39731	6908.98	0.128867	211015-56B	78.956	8.26406
211015-57A	0	NaN	NaN	NaN	NaN	NaN	0	0	211015-57A	74.874	7.83681
211015-57B	0	NaN	NaN	NaN	NaN	NaN	0	0	211015-57B	74.467	7.79421
211015-57C	0	NaN	NaN	NaN	NaN	NaN	0	0	211015-57C	76.624	8.01998
211015-57D	0	NaN	NaN	NaN	NaN	NaN	0	0	211015-57D	74.717	7.82038
211015-58A	1	11678.9	25.8678	302106	NaN	NaN	9732.86	0.0322167	211015-58A	98.52	10.3118
211015-58B	0	NaN	NaN	NaN	NaN	NaN	0	0	211015-58B	100.903	10.5612
211015-59A	1	1711.37	155	265263	NaN	NaN	8545.89	0.0322167	211015-59A	102.198	10.6967
211015-59B	1	4173.48	24.3944	101810	NaN	NaN	3279.97	0.0322167	211015-59B	97.408	10.1954
211015-60A	1	5536.58	16.3636	90598.6	NaN	NaN	2918.79	0.0322167	211015-60A	106.29	11.125
211015-60B	3	6087.15	23.3928	145710	196	10.1397	14082.9	0.09665	211015-60B	105.771	11.0707
1 mM CaCl2
Name	Num of Peaks	Peak height (mean)	Peak width (mean)	Peak area (mean)	Peak interval (mean, px)	Peak interval (mean, s)	Total peak itensity (calcium amount)	Frequency	Name	Length (px)	Length (um)
221004-06A	4	820.915	140	115753	153.333	7.9571	14870.3	0.128467	221004-06A	39.942	4.1806
221004-06B	0	NaN	NaN	NaN	NaN	NaN	0	0	221004-06B	40.206	4.20823
221004-07A	7	444.648	81.2857	36254.2	91	4.72237	8150.55	0.224817	221004-07A	38.666	4.04704
221004-07B	0	NaN	NaN	NaN	NaN	NaN	0	0	221004-07B	35.875	3.75492
221004-08A	13	2685.62	22.2141	56161.1	30.8333	1.60007	23448.2	0.417517	221004-08A	43.424	4.54505
221004-08B	5	3396.44	94.8712	307286	107.75	5.59159	49345.1	0.160583	221004-08B	45.865	4.80054
221004-10A	6	2945.79	49.2908	93528.3	86.4	4.48365	18022.9	0.1927	221004-10A	49.517	5.18278
221004-10B	1	2950.15	115	339268	NaN	NaN	10896.1	0.0321167	221004-10B	48.667	5.09381
221004-21A	1	5154.77	19.7499	101806	NaN	NaN	3269.67	0.0321167	221004-21A	93.59	9.79575
221004-21B	2	2131.48	73.8268	133195	89	4.61858	8555.58	0.0642333	221004-21B	38.978	4.0797
221004-23A	1	5170.74	13.7193	70939.1	NaN	NaN	2278.33	0.0321167	221004-23A	102.954	10.7759
221004-23B	17	17209.8	32.235	545213	33.1875	1.72224	297677	0.545983	221004-23B	100.785	10.5488
221004-24A	1	2872.24	22.3007	64052.8	NaN	NaN	2057.16	0.0321167	221004-24A	110.994	11.6174
221004-24B	0	NaN	NaN	NaN	NaN	NaN	0	0	221004-24B	107.941	11.2978
221004-25A	2	5103.89	15.9796	81327.5	152	7.88791	5223.94	0.0642333	221004-25A	118.571	12.4104
221004-25B	25	4369.13	16.7307	72733.4	23.875	1.23897	58398.8	0.802917	221004-25B	117.391	12.2869
221018-06A	1	329.565	100	32956.5	NaN	NaN	978.555	0.0296923	221018-06A	39.521	4.13653
221018-06B	17	405.598	35.2896	14678.6	35.875	1.85881	7409.31	0.504769	221018-06B	36.097	3.77815
221018-07A	0	NaN	NaN	NaN	NaN	NaN	0	0	221018-07A	40.633	4.25292
221018-07B	2	1519.62	141.487	198620	261	13.5233	11795	0.0593846	221018-07B	39.352	4.11884
221018-08A	0	NaN	NaN	NaN	NaN	NaN	0	0	221018-08A	31.968	3.34598
221018-08B	11	353.923	42.1582	15483.6	45.2	2.34197	5057.19	0.326615	221018-08B	34.952	3.65831
221018-09A	25	3750.31	18.5487	69119.5	23.75	1.23057	51308	0.742308	221018-09A	50.915	5.3291
221018-09B	3	2086.68	153.059	216379	180.5	9.35233	19274.4	0.0890769	221018-09B	50.614	5.2976
221018-10A	10	462.554	62.9	29744	67	3.4715	8831.69	0.296923	221018-10A	37.802	3.95661
221018-10B	0	NaN	NaN	NaN	NaN	NaN	0	0	221018-10B	38.211	3.99942
221018-21A	2	3295.65	95	314315	62	3.21244	18665.5	0.0593846	221018-21A	78.402	8.20608
221018-21B	1	7350.98	15.6382	114956	NaN	NaN	3413.32	0.0296923	221018-21B	80.184	8.39259
221018-22A	0	NaN	NaN	NaN	NaN	NaN	0	0	221018-22A	74.05	7.75057
221018-22B	1	8614.75	14.6861	126517	NaN	NaN	3756.58	0.0296923	221018-22B	76.269	7.98282
221018-24A	1	5773.5	21.0378	121461	NaN	NaN	3606.47	0.0296923	221018-24A	72.476	7.58582
221018-24B	7	5768.15	80.1081	395361	90.6667	4.69775	82174.3	0.207846	221018-24B	71.166	7.44871
221018-25A	1	1792.42	559	1.00196e+06	NaN	NaN	29750.5	0.0296923	221018-25A	46.631	4.88071
221018-25B	12	2107.09	36.8615	74567.2	45.6364	2.36458	26568.9	0.356308	221018-25B	44.179	4.62407
221018-36A	1	3597.17	15.62	56187.9	NaN	NaN	1668.35	0.0296923	221018-36A	38.115	3.98937
221018-36B	17	1111.9	26.2468	28764.6	35.4375	1.83614	14519.5	0.504769	221018-36B	38.195	3.99774
221018-37A	0	NaN	NaN	NaN	NaN	NaN	0	0	221018-37A	44.19	4.62522
221018-37B	2	3797.6	21.5956	81224.6	388	20.1036	4823.49	0.0593846	221018-37B	46.093	4.8244
221018-38A	13	587.478	39.844	23644.1	38.8333	2.01209	9126.64	0.386	221018-38A	74.259	7.77244
221018-38B	13	1368.1	44.9231	63261.5	46.3333	2.40069	24418.9	0.386	221018-38B	78.794	8.24711
221018-39A	5	2697.74	112.048	299912	49.25	2.55181	44525.4	0.148462	221018-39A	54.38	5.69177
221018-39B	12	3842.3	49.9167	192752	49.8182	2.58125	68679.1	0.356308	221018-39B	56.188	5.88101
221018-40A	22	3798.7	24.5491	92693.8	30	1.5544	60550.4	0.653231	221018-40A	68.713	7.19196
221018-40B	5	6193.21	37.0454	188845	111.25	5.76425	28036.2	0.148462	221018-40B	67.764	7.09263
221020-11A	6	1009.55	76.0196	64235.2	89.8	4.65285	11443.8	0.178154	221020-11A	45.667	4.77981
221020-11B	0	NaN	NaN	NaN	NaN	NaN	0	0	221020-11B	43.229	4.52464
221020-12A	1	2917.62	23.3122	68016.1	NaN	NaN	2019.55	0.0296923	221020-12A	51.887	5.43084
221020-12B	1	5373.91	29.4256	158131	NaN	NaN	4695.26	0.0296923	221020-12B	54.248	5.67796
221020-13A	1	1442.44	28.0404	40446.4	NaN	NaN	1200.95	0.0296923	221020-13A	46.481	4.86501
221020-13B	0	NaN	NaN	NaN	NaN	NaN	0	0	221020-13B	28.248	2.95662
221020-14A	11	5014.61	24.5909	120947	56.5	2.92746	39503.2	0.326615	221020-14A	77.973	8.16117
221020-14B	7	2957.85	42.8087	108178	93.3333	4.83592	22484.3	0.207846	221020-14B	82.999	8.68723
221020-15A	0	NaN	NaN	NaN	NaN	NaN	0	0	221020-15A	55.93	5.85401
221020-15B	2	3358.83	21.0766	70514.8	356	18.4456	4187.49	0.0593846	221020-15B	56.291	5.89179
221020-16A	0	NaN	NaN	NaN	NaN	NaN	0	0	221020-16A	67.658	7.08154
221020-16B	1	2498.51	536.227	1.33977e+06	NaN	NaN	39780.7	0.0296923	221020-16B	63.282	6.62352
221020-17A	0	NaN	NaN	NaN	NaN	NaN	0	0	221020-17A	52.048	5.44769
221020-17B	3	1523.02	182.413	204296	264	13.6788	18198	0.0890769	221020-17B	52.526	5.49772
221020-18A	15	2370.28	30.5103	65430	41.7857	2.16506	29141.5	0.445385	221020-18A	48.593	5.08607
221020-18B	9	2568.12	21.9589	56874.9	75.375	3.90544	15198.7	0.267231	221020-18B	45.8	4.79373
221020-31A	13	1900.18	45.7692	87142.6	47.6667	2.46978	33637	0.386	221020-31A	101.542	10.6281
221020-31B	7	2831.98	71.181	185761	94.3333	4.88774	38609.6	0.207846	221020-31B	107.51	11.2527
221020-32A	4	5176.42	15.1759	78168.4	65.6667	3.40242	9284	0.118769	221020-32A	33.423	3.49827
221020-32B	1	6238.07	89.758	559917	NaN	NaN	16625.2	0.0296923	221020-32B	35.7	3.7366
221020-33A	4	6123.71	18.5555	107095	61.6667	3.19516	12719.6	0.118769	221020-33A	64.439	6.74462
221020-33B	3	3766.76	19.0379	71665.4	178.5	9.2487	6383.73	0.0890769	221020-33B	62.27	6.51759
221020-34A	4	5074.39	32.9158	135726	157.333	8.15199	16120.1	0.118769	221020-34A	45.678	4.78096
221020-34B	6	2508.19	80.6165	180833	101.2	5.24352	32216	0.178154	221020-34B	39.108	4.0933
221020-35A	13	7085.5	32.3342	152610	47.5833	2.46546	58907.5	0.386	221020-35A	66.887	7.00084
221020-35B	9	3493.87	15.2515	53627.3	78.625	4.07383	14330.9	0.267231	221020-35B	60.412	6.32312
221020-36A	1	1628.52	20.9879	34179.2	NaN	NaN	1014.86	0.0296923	221020-36A	30.645	3.20751
221020-36B	2	1599.79	125.622	164892	266	13.7824	9792.03	0.0593846	221020-36B	30.987	3.24331
221020-37A	2	8599.72	285.971	1.9718e+06	417	21.6062	117095	0.0593846	221020-37A	59.182	6.19438
221020-37B	28	5856.26	20.2328	115352	20.963	1.08616	95902.2	0.831385	221020-37B	58.094	6.08051
221020-38A	17	1777.25	26.3753	42827.2	37	1.9171	21617.9	0.504769	221020-38A	54.139	5.66655
221020-38B	1	4993.6	19.4704	97227.6	NaN	NaN	2886.91	0.0296923	221020-38B	55.437	5.80241
221020-46A	15	4393.52	19.9419	86222.5	42.9286	2.22428	38402.2	0.445385	221020-46A	74.174	7.76355
221020-46B	14	3154.77	25.5099	76408.9	46.5385	2.41132	31762.6	0.415692	221020-46B	74.556	7.80353
221020-47A	4	9930.69	15.3146	152262	108.333	5.61313	18084.1	0.118769	221020-47A	95.034	9.94689
221020-47B	6	567.27	69.4817	33181.2	79.2	4.10363	5911.36	0.178154	221020-47B	96.031	10.0512
221020-48A	7	4351.63	33.2606	120534	97.5	5.05181	25052.6	0.207846	221020-48A	61.64	6.45165
221020-48B	7	4053.51	35.9148	115656	58	3.00518	24038.6	0.207846	221020-48B	63.503	6.64665
221020-49A	5	8280.06	45.3447	356039	124.75	6.46373	52858.1	0.148462	221020-49A	62.451	6.53654
221020-49B	8	5031.97	66.7861	262998	58.7143	3.04219	62472.1	0.237538	221020-49B	64.447	6.74545
221020-50A	0	NaN	NaN	NaN	NaN	NaN	0	0	221020-50A	59.218	6.19815
221020-50B	4	1528.61	123	188053	124.667	6.45941	22334.9	0.118769	221020-50B	56.978	5.9637
221020-51A	1	13664.4	13.338	182255	NaN	NaN	5411.59	0.0296923	221020-51A	78.534	8.21989
221020-51B	0	NaN	NaN	NaN	NaN	NaN	0	0	221020-51B	72.181	7.55494
221020-53A	27	15858.1	17.5639	272749	23.8077	1.23356	218661	0.801692	221020-53A	113.618	11.892
221020-53B	18	13812.5	21.442	270296	34.3529	1.77995	144463	0.534462	221020-53B	110.676	11.5841
221020-54A	21	14865.1	26.4751	363155	26.75	1.38601	226441	0.623538	221020-54A	77.752	8.13804
221020-54B	20	11384.1	20.6513	231396	32.0526	1.66076	137414	0.593846	221020-54B	80.239	8.39835
221020-56A	19	15505.5	18.027	281681	34.6111	1.79332	158912	0.564154	221020-56A	125.594	13.1455
221020-56B	10	24692.3	28.1715	591234	65.4444	3.3909	175551	0.296923	221020-56B	123.787	12.9564
221020-56C	23	16509.8	24.6113	399316	27.5909	1.42958	272702	0.682923	221020-56C	84.796	8.87531
221020-56D	25	13256.4	23.4121	303675	25.0833	1.29965	225420	0.742308	221020-56D	84.066	8.79891

## Sheet: Differences
Control				ppr2				1 mM CaCl2
Name	Length (um)	Total peak itensity (calcium amount)	Difference	Name	Length (um)	Total peak itensity (calcium amount)	Difference	Name	Length (um)	Total peak itensity (calcium amount)	Difference
190328-11A	8.53008	57914.1	33038.1	190328-01A	6.25822	23047.2	4325.68	221004-06A	4.1806	14870.3	1777.1
190328-11B	8.54076	0	-24904.9	190328-01B	6.33274	13231.5	-5691.92	221004-06B	4.20823	0	-13168.1
190328-12A	9.23953	44928.3	18130.4	190328-02A	5.18902	8433.01	-7392.03	221004-07A	4.04704	8150.55	-4580.88
190328-12B	9.26193	29126.7	2268.15	190328-02B	5.51213	7785.24	-8915.13	221004-07B	3.75492	0	-11940.1
190328-13A	9.81177	0	-28348.1	190328-02C	5.21382	0	-15892.2	221004-08A	4.54505	23448.2	9367.68
190328-13B	9.84327	30073	1639.54	190328-02D	5.30614	19276.9	3134.61	221004-08B	4.80054	49345.1	34572.4
190328-13C	7.55508	0	-22234.7	190328-02E	5.93542	5659.91	-12187.1	221004-10A	5.18278	18022.9	2214.76
190328-13D	7.67817	15140.9	-7427.31	190328-02F	5.67667	0	-17146.1	221004-10B	5.09381	10896.1	-4671
190328-14A	7.69743	0	-22620.3	190328-03A	2.45263	11195.4	2783.21	221004-21A	9.79575	3269.67	-25035
190328-14B	7.78661	34514.6	11652.7	190328-03B	2.27354	1787.46	-6139.55	221004-21B	4.0797	8555.58	-4264.32
190328-15A	7.8582	51309.4	28253.5	190328-03C	2.98351	15442.7	5592.35	221004-23A	10.7759	2278.33	-28681.5
190328-15B	7.57444	34511.8	12224.6	190328-03D	2.61999	11480.8	2615.23	221004-23B	10.5488	297677	267333
190328-16A	6.83778	15451.6	-4839.97	190328-04A	4.52907	12359.1	-1678.18	221004-24A	11.6174	2057.16	-31182.3
190328-16B	7.00923	0	-20756	190328-04B	4.3662	26498.8	12902.7	221004-24B	11.2978	0	-32373.8
190328-17A	8.67903	22614.7	-2664.74	190328-05A	4.32381	0	-13481.2	221004-25A	12.4104	5223.94	-30163.9
190328-17B	8.41306	25011.9	452.938	190328-05B	4.68775	17121.1	2653.95	221004-25B	12.2869	58398.8	23345.6
190328-17C	7.1521	12029.5	-9113.54	190328-06A	5.77967	20117.2	2692.1	221018-06A	4.13653	978.555	-11995.3
190328-17D	6.89357	21055.2	612.488	190328-06B	5.50847	19849	3158.57	221018-06B	3.77815	7409.31	-4593.71
190328-18A	7.31957	61494.5	39897.8	190328-07A	5.71844	8949.96	-8309.28	221018-07A	4.25292	0	-13289.2
190328-18B	7.58031	47285	24981.9	190328-07B	5.51956	9969.72	-6750.78	221018-07B	4.11884	11795	-1130.95
190328-19A	9.01512	21856.8	-4333.13	190328-08A	4.66336	21996.1	7595	221018-08A	3.34598	0	-10832.3
190328-19B	8.63559	106011	80849.4	190328-08B	4.24835	17802.2	4525.43	221018-08B	3.65831	5057.19	-6621.17
190328-19C	7.7551	19053	-3723.61	190328-09A	5.48973	1137.01	-15502.7	221018-09A	5.3291	51308	35103.4
190328-19D	7.93577	9307.77	-13958.2	190328-09B	5.43604	1814.82	-14679.4	221018-09B	5.2976	19274.4	3155.19
190328-20A	5.79631	62389.8	44919.6	190328-10A	4.98439	1413.35	-13857.3	221018-10A	3.95661	8831.69	-3654.76
190328-20B	5.90998	64051.7	46273.5	190328-10B	4.88212	8413.74	-6579.93	221018-10B	3.99942	0	-12602.4
190328-21A	7.10542	42683.1	21666.5	190328-25A	10.614	44318	13796.8	221018-21A	8.20608	18665.5	-5332.78
190328-21B	7.10186	28524.1	7517.15	190328-25B	11.2715	19667.7	-12634.8	221018-21B	8.39259	3413.32	-21090.2
190328-22A	8.03248	51625	28097	190328-26A	6.83359	13517.8	-6762.44	221018-22A	7.75057	0	-22764.3
190328-22B	7.5152	29243.9	7117.23	190328-26B	6.9772	24239.6	3570.38	221018-22B	7.98282	3756.58	-19636.9
190328-22C	8.13862	42001.3	18185.8	190328-26C	9.21201	48672.9	21949.6	221018-24A	7.58582	3606.47	-18711.5
190328-22D	8.05666	16552	-7041.48	190328-26D	8.96833	29020.4	2957.15	221018-24B	7.44871	82174.3	60227.7
190328-23A	7.35118	0	-21682.4	190328-27A	9.57427	28914.9	1210.23	221018-25A	4.88071	29750.5	14760.7
190328-23B	7.03487	14115.3	-6710.18	190328-27B	9.35415	68892.6	41784.3	221018-25B	4.62407	26568.9	12274.3
190328-24A	5.12716	35711.6	20054.2	190328-28A	8.76496	38516.9	13004.6	221018-36A	3.98937	1668.35	-10906.9
190328-24B	5.35743	20217.7	3936.47	190328-28B	8.79364	44962.7	19372.7	221018-36B	3.99774	14519.5	1921.58
190328-36A	6.72023	9944.4	-10028.7	190328-28C	9.03449	5967.57	-20274.9	221018-37A	4.62522	0	-14297.7
190328-36B	6.75896	9420.46	-10657.6	190328-28D	9.32254	10180.4	-16842.3	221018-37B	4.8244	4823.49	-10013.8
190328-37A	9.43485	65179.8	37852.8	190328-29A	8.4789	28326.5	3589.21	221018-38A	7.77244	9126.64	-13696.9
190328-37B	9.5997	0	-27773.6	190328-29B	8.88837	20859.1	-4987.44	221018-38B	8.24711	24418.9	309.528
190328-38A	10.5549	46940.4	16579.1	190328-29C	8.91024	41828.1	15922.2	221018-39A	5.69177	44525.4	27338.4
190328-39A	10.447	56160.7	26091.8	190328-29E	7.23479	10291.7	-11075.3	221018-39B	5.88101	68679.1	50979.5
190328-40A	8.72738	40004.6	14594.1	190328-30A	7.53143	0	-22170.6	221018-40A	7.19196	60550.4	39299.4
190328-40B	8.85341	38088.7	12336.9	190328-30B	7.31779	36565.3	14973.4	221018-40B	7.09263	28036.2	7054.22
190328-42A	8.51344	55141	30310	190328-31A	6.50252	26678.8	7295.51	221020-11A	4.77981	11443.8	-3272.76
190328-42B	8.25061	36413.4	12294.5	190328-31B	6.33651	15475.3	-3458.28	221020-11B	4.52464	0	-14025.2
190328-43A	9.0595	30312.9	4002.71	190328-32A	8.69588	14491.5	-10833.7	221020-12A	5.43084	2019.55	-14460.6
190328-43B	9.31322	35412.1	8414.54	190328-32B	8.44949	19788.4	-4869.21	221020-12B	5.67796	4695.26	-12454.3
190328-45A	9.40879	50042	22785.6	190328-32C	8.05195	23797.2	216.495	221020-13A	4.86501	1200.95	-13746.4
190328-45B	9.19358	62846.7	36173.3	190328-32D	8.36282	15141	-9281.88	221020-13B	2.95662	0	-9777.49
190328-46A	7.91483	36511.3	13302	190328-32E	7.48579	15580.5	-6466.46	221020-14A	8.16117	39503.2	15626.5
190328-46B	9.83312	0	-28405.9	190328-32F	7.42131	890.983	-20981.4	221020-14B	8.68723	22484.3	-2817.38
190328-46C	7.54503	35658.3	13450.8	190328-33A	6.69459	18442.6	-1461.05	221020-15A	5.85401	0	-17626.5
190328-46D	7.18978	0	-21245.1	190328-33B	6.66905	24262.1	4427.62	221020-15B	5.89179	4187.49	-13541.4
190328-46E	10.3963	17344.7	-12587	190328-33C	8.29918	0	-24250.5	221020-16A	7.08154	0	-20951.9
190328-46G	10.2306	83154.7	53672.1	190328-33D	8.22916	0	-24060.8	221020-16B	6.62352	39780.7	20069.6
190328-47A	9.86012	116544	88065.1	190328-33E	9.10838	35422.2	8979.54	221020-17A	5.44769	0	-16525.8
190328-47B	9.83354	0	-28407.1	190328-34A	8.55217	30681.4	5745.61	221020-17B	5.49772	18198	1536.7
190328-47C	8.65192	32895.5	7689.42	190328-34B	8.37789	5777.51	-18686.2	221020-18A	5.08607	29141.5	13595.3
190328-47D	9.13863	0	-26524.6	190328-34C	7.35307	14977.8	-6709.65	221020-18B	4.79373	15198.7	444.502
190328-47E	9.33437	73775.4	46720.6	190328-34D	7.54995	30596.8	8376.01	221020-31A	10.6281	33637	3077.61
190328-48A	11.0699	35707.5	3951.17	190328-34E	8.28767	0	-24219.3	221020-31B	11.2527	38609.6	6358.01
190328-49A	9.94417	46657.3	17950.6	190328-34F	8.38459	50316.5	25834.6	221020-32A	3.49827	9284	-1960.83
190328-49B	9.67653	33808.1	5826.34	190328-35A	9.23221	58062.6	31284.6	221020-32B	3.7366	16625.2	4734.77
190328-50A	12.6017	99977.3	64071.2	190328-35B	9.0617	14298	-12018.1	221020-33A	6.74462	12719.6	-7319.52
190328-50B	12.1054	63536.3	28974.8	190328-35C	6.52628	27628.8	8181.15	221020-33B	6.51759	6383.73	-13040.4
190328-51A	10.2554	33660.8	4111.08	190328-35D	5.54458	12377.2	-4411.1	221020-34A	4.78096	16120.1	1400.47
190328-51B	10.2124	19335.3	-10098.2	190328-35E	5.90109	14800.7	-2953.32	221020-34B	4.0933	32216	19359.3
190328-51C	11.6168	51627.9	18390	190328-56A	8.71242	25305.1	-64.7902	221020-35A	7.00084	58907.5	38174.2
190328-51D	11.6459	15833.8	-17483	190328-56B	8.89821	14615.3	-11257.9	221020-35B	6.32312	14330.9	-4566.47
190328-52A	9.80559	27957.5	-373.884	190328-57A	8.80547	17597.2	-8024.8	221020-36A	3.20751	1014.86	-9442.28
190328-52B	9.68867	53486.5	25471.9	190328-57B	8.42949	11928.5	-12675	221020-36B	3.24331	9792.03	-762.085
190328-52C	9.37791	36807.2	9634.4	190328-57C	9.45338	13417.9	-13959.3	221020-37A	6.19438	117095	98546.1
190328-52D	9.11309	25268.3	-1187.1	190328-57D	9.51356	15832.6	-11707.7	221020-37B	6.08051	95902.2	77662.1
190328-52E	7.96047	21198.5	-2134.44	190328-58A	8.30054	26901.4	2647.27	221020-38A	5.66655	21617.9	4499.19
190328-52F	8.21419	0	-24020.2	190328-58B	7.99574	25292.6	1864.14	221020-38B	5.80241	2886.91	-14599.8
190328-53A	10.8627	38924.5	7729.62	190328-59A	10.0337	42595.8	13646.6	221020-46A	7.76355	38402.2	15602.7
190328-53B	11.2707	52766.5	20466.3	190328-59B	9.98332	29852.9	1040.07	221020-46B	7.80353	31762.6	8854.85
190328-54A	10.4643	78165.4	48049.6	190328-59C	6.76545	0	-20095.6	221020-47A	9.94689	18084.1	-10630.1
190328-54B	10.9787	108759	77249.6	190328-59D	7.19899	10659.6	-10610.4	221020-47B	10.0512	5911.36	-23085.5
190328-55A	10.8144	108993	77928.7	190328-59E	9.24152	45297.4	18494.1	221020-48A	6.45165	25052.6	5807.07
190328-55B	10.9317	128427	97044.8	190328-59F	9.17799	22946.8	-3684.39	221020-48B	6.64665	24038.6	4264.87
190328-66A	4.6934	715.766	-13766.7	190328-60A	8.15798	51829.7	27961.8	221020-49A	6.53654	52858.1	33382.6
190328-66B	4.69466	1155.68	-13330.2	190328-60B	8.22277	43650	19606.5	221020-49B	6.74545	62472.1	42430.7
190328-67A	8.71284	34640.9	9269.84	190328-61A	7.78033	39257.3	16412.4	221020-50A	6.19815	0	-18558.8
190328-69A	7.33747	59158.2	37513	190328-61B	7.44298	2497.42	-19433.6	221020-50B	5.9637	22334.9	4411.21
190328-69B	7.40111	32300.5	10482.9	190328-62A	9.2409	7776.13	-19025.5	221020-51A	8.21989	5411.59	-18624.1
211015-01A	2.6668	4429.52	-4562.85	190328-62B	8.8622	30206.4	4430.75	221020-51B	7.55494	0	-22234.3
211015-01B	2.50907	2693.55	-5871.52	190328-63A	8.7748	0	-25538.9	221020-53A	11.892	218661	184677
211015-01C	8.5273	7640.78	-17227.7	190328-63B	8.88512	17749.6	-8088.19	221020-53B	11.5841	144463	111314
211015-01D	8.69393	0	-25319.8	190328-63C	9.32097	26574.2	-444.34	221020-54A	8.13804	226441	202627
211015-01E	8.0944	1483.98	-22211.7	190328-63E	8.82002	27641.6	1980.18	221020-54B	8.39835	137414	112894
211015-01F	8.14966	0	-23845.4	190328-64A	8.36198	32158.5	7737.9	221020-56A	13.1455	158912	121532
211015-02A	6.97645	10049.7	-10617.5	190328-64B	8.09465	10033.4	-13663	221020-56B	12.9564	175551	138684
211015-02B	6.83735	0	-20290.4	190328-65A	7.78295	21215.3	-1636.68	221020-56C	8.87531	272702	246891
211015-02C	5.8091	0	-17504.9	190328-65B	7.60072	13246.6	-9111.71	221020-56D	8.79891	225420	199816
211015-02D	5.75771	0	-17365.6	211015-11A	8.7764	35854.6	10311.3
211015-03A	9.60976	0	-27800.8	211015-11B	8.67603	7607.52	-17663.8
211015-03B	9.43832	16872.1	-10464.3	211015-11C	8.43174	0	-24609.6
211015-03C	8.94733	21851.5	-4154.78	211015-11D	8.24313	9235.56	-14863.1
211015-03D	8.95549	0	-26028.4	211015-11E	6.99487	0	-20717.1
211015-04A	6.61284	0	-19682.2	211015-11F	7.1345	0	-21095.4
211015-04B	6.77654	7411.17	-12714.5	211015-11G	10.1259	3426.1	-25772.9
211015-04C	7.29558	0	-21531.7	211015-12A	2.82286	0	-9415.13
211015-04D	7.07683	45124.9	24185.7	211015-12B	2.79303	0	-9334.32
211015-05A	8.61187	33757.5	8659.99	211015-13A	2.94427	0	-9744.04
211015-05B	8.87134	11229.4	-14571.1	211015-13B	2.77796	4925.91	-4367.58
211015-05C	7.27245	0	-21469.1	211015-14A	7.47529	0	-22018.6
211015-05D	7.278	0	-21484.1	211015-14B	7.42422	0	-21880.2
211015-05E	7.87585	28952.7	5848.97	211015-14C	8.49506	0	-24781.1
211015-05F	7.74397	54353.4	31606.9	211015-14D	6.81841	0	-20239.1
211015-05G	11.5699	52509	19398.3	211015-15A	7.66223	0	-22525
211015-06A	8.19289	3801.65	-20160.9	211015-15B	7.49759	13629.9	-8449.06
211015-06B	7.5359	53975.9	31793.2	211015-15C	7.74355	0	-22745.3
211015-06C	8.12171	36012.5	12242.8	211015-15D	7.58111	0	-22305.2
211015-06D	8.05797	0	-23597	211015-15E	6.76105	0	-20083.7
211015-06E	9.75336	83529.5	55339.7	211015-15F	6.79433	10696.9	-9476.95
211015-06F	10.1539	23648	-5627.02	211015-15G	8.64159	0	-25178.1
211015-06G	3.75963	8818.38	-3134.45	211015-16A	8.12077	0	-23767.2
211015-07A	8.81251	0	-25641.1	211015-16B	8.07995	0	-23656.6
211015-07B	9.0006	37814.1	11663.5	211015-16C	9.84578	0	-28440.2
211015-07C	8.22387	15343.6	-8702.83	211015-16D	10.0591	0	-29018.1
211015-07D	8.21926	0	-24034	211015-16E	8.82455	13917.5	-11756.2
211015-07E	8.63092	55905.9	30756.7	211015-16F	8.73213	11415.6	-14007.8
211015-07F	8.5723	18666	-6324.35	211015-17A	11.5123	0	-32954.8
211015-08A	7.81912	3454.21	-19495.8	211015-17B	11.5402	0	-33030.5
211015-08B	7.78312	2647.52	-20204.9	211015-17C	8.80739	0	-25627.2
211015-08C	7.29883	0	-21540.5	211015-17D	8.78719	0	-25572.5
211015-08D	7.18788	12343.9	-8896.07	211015-18A	6.03445	0	-18115.3
211015-08E	8.96564	22964.6	-3091.31	211015-18B	5.83998	0	-17588.5
211015-08F	8.86223	50306.1	24530.3	211015-18C	9.18293	6169.45	-20475.1
211015-09A	6.80899	0	-20213.5	211015-31A	10.4488	0	-30073.7
211015-09B	6.60855	0	-19670.6	211015-31B	10.1655	0	-29306.4
211015-09C	10.0083	31337	2456.48	211015-31C	11.824	0	-33799.2
211015-09D	9.71359	47098.2	19016.1	211015-31D	12.0577	0	-34432.3
211015-09E	11.9081	68241.5	34214.4	211015-32A	8.46282	2663.12	-22030.7
211015-09F	11.9538	71282.9	37132.1	211015-32B	8.54624	9099.99	-15819.8
211015-10C	8.60664	23225	-1858.33	211015-33A	10.1515	2744.23	-26524.2
211015-10D	8.76887	0	-25522.9	211015-33B	10.3037	0	-29680.7
211015-10E	8.84726	0	-25735.2	211015-33C	12.1524	15378.2	-19310.7
211015-19A	8.4736	7121.45	-17601.5	211015-33D	12.4488	18034.5	-17457.5
211015-19B	8.39259	14924.7	-9578.83	211015-34A	7.65637	0	-22509.1
211015-20A	7.06772	18916.5	-1998	211015-34B	7.24565	11287.9	-10108.6
211015-20B	6.87294	46955.6	26568.8	211015-35A	11.7038	0	-33473.7
211015-21A	3.24163	0	-10549.6	211015-35B	11.5796	0	-33137.1
211015-21B	3.18302	2939.34	-7451.45	211015-36A	3.83708	0	-12162.6
211015-22A	10.0201	2384.06	-26528.3	211015-36B	3.86346	0	-12234.1
211015-22B	10.567	0	-30394.1	211015-37A	11.0366	0	-31666.1
211015-23A	9.89895	3777.74	-24806.5	211015-37B	10.7229	0	-30816.3
211015-23B	9.94459	3218.35	-25489.5	211015-38A	7.9935	26103.9	2681.52
211015-23C	5.13411	0	-15676.3	211015-38B	8.054	0	-23586.3
211015-23D	4.92143	0	-15100.1	211015-38C	6.08961	0	-18264.8
211015-24A	6.38561	0	-19066.6	211015-38D	5.92654	9121.91	-8701.09
211015-24B	6.964	0	-20633.5	211015-39A	9.5119	31076.9	3541.19
211015-25A	13.2318	13542.2	-24070.6	211015-39B	9.5657	25344.9	-2336.62
211015-25B	12.8802	8163.68	-28496.7	211015-40A	10.9486	0	-31427.6
211015-26A	10.2641	0	-29573.5	211015-40B	10.6905	26073.9	-4654.84
211015-26B	10.224	0	-29464.9	211015-51A	10.2316	8305.73	-21179.6
211015-27A	11.4951	50372.3	17464	211015-51B	10.2155	0	-29441.7
211015-27B	11.69	19109.7	-14326.5	211015-51C	9.9941	0	-28842
211015-28A	9.62002	18646.2	-9182.4	211015-51D	9.94093	2064.62	-26633.3
211015-28B	9.50101	0	-27506.2	211015-51E	8.65206	0	-25206.4
211015-28C	9.37656	85120.8	57951.7	211015-52A	8.97674	21526.9	-4559.08
211015-28D	8.50584	709.098	-24101.2	211015-52B	9.15027	12108.1	-14447.9
211015-29A	2.33323	2267.08	-5821.64	211015-53A	10.0977	63642.9	34520.2
211015-29B	2.28812	0	-7966.51	211015-53B	10.4258	44198.2	14186.6
211015-29C	8.22481	0	-24049	211015-54A	11.5001	51100.1	18178.2
211015-29D	7.55808	15470.4	-6772.49	211015-54B	11.236	24475.1	-7731.15
211015-30A	8.82528	12204.3	-13471.4	211015-55A	6.61734	29637.2	9942.82
211015-30B	8.75767	2212.46	-23280.1	211015-55B	6.47123	62736.1	43437.5
211015-41A	7.17783	72275.7	51062.9	211015-56A	8.15594	17322.1	-6540.38
211015-41B	7.38748	8300.4	-13480.3	211015-56B	8.26406	6908.98	-17246.4
211015-42A	8.09879	39315.7	15608.1	211015-57A	7.83681	0	-22997.9
211015-42B	8.17823	21468.5	-2454.34	211015-57B	7.79421	0	-22882.5
211015-43A	8.69382	1943.18	-23376.4	211015-57C	8.01998	0	-23494.1
211015-43B	9.07607	3662.3	-22692.8	211015-57D	7.82038	0	-22953.4
211015-43C	6.82615	1245.23	-19014.8	211015-58A	10.3118	9732.86	-19969.7
211015-43D	6.60782	0	-19668.6	211015-58B	10.5612	0	-30378.2
211015-43E	10.7055	413.644	-30355.6	211015-59A	10.6967	8545.89	-22199.5
211015-43F	10.8075	17428.7	-13616.7	211015-59B	10.1954	3279.97	-26107.3
211015-44A	8.39395	24981.1	473.833	211015-60A	11.125	2918.79	-28986.9
211015-44B	8.37804	15517.7	-8946.46	211015-60B	11.0707	14082.9	-17675.6
211015-46A	8.47193	0	-24718.5
211015-46B	8.52824	0	-24871
211015-46C	11.6193	7831.51	-25413.1
211015-47A	10.4948	27497.2	-2701.29
211015-47B	10.4203	70556.6	40560
211015-47C	9.41801	1858.18	-25423.2
211015-47D	9.55858	1750.24	-25911.9
211015-47E	10.3017	18301.9	-11373.4
211015-48A	11.7457	0	-33587.1
211015-48B	11.4214	13029.8	-19678.9
211015-48C	9.31826	19120.9	-7890.3
211015-48D	9.48856	0	-27472.5
211015-49A	8.29672	0	-24243.8
211015-49B	8.58957	14617.1	-10420.1
211015-50A	9.74415	0	-28164.9
211015-50B	9.94815	34168.8	5451.3
221004-01A	5.18236	0	-15807
221004-01B	5.60794	0	-16959.9
221004-02A	6.2487	12642.5	-6053.21
221004-02B	6.47876	0	-19319
221004-03A	9.18691	0	-26655.3
221004-03B	8.85972	21543.5	-4225.45
221004-04A	4.5686	42748.2	28603.9
221004-04B	4.49397	19069.8	5127.66
221004-05A	5.54472	7763.66	-9024.97
221004-05B	5.65504	39993.8	22906.3
221004-16A	9.27137	5203	-21681.2
221004-16B	8.92869	0	-25955.8
221004-17A	11.7782	0	-33675.3
221004-17B	11.878	0	-33945.5
221004-18A	9.38117	0	-27181.6
221004-18B	9.2003	0	-26691.6
221004-19A	8.51212	1305.01	-23522.3
221004-19B	8.51442	0	-24833.6
221018-02A	6.5536	50772.4	31250.7
221018-02B	6.50765	2695.26	-16702
221018-03A	7.53726	22472.5	286.1
221018-03B	7.58143	10495.4	-11810.6
221018-04A	4.77877	16069.5	1355.81
221018-04B	4.62972	1643.47	-12666.4
221018-05A	6.91501	14635.2	-5865.61
221018-05B	6.78962	9024.49	-11136.6
221018-16A	9.92366	0	-28651.2
221018-16B	9.69067	32415.1	4395.1
221018-17A	8.84088	0	-25717.9
221018-17B	8.67802	0	-25276.8
221018-18A	10.835	0	-31120
221018-18B	10.6388	1582.05	-29006.6
221018-19A	10.1649	7951.68	-21353.1
221018-19B	10.3372	0	-29771.5
221018-20A	11.5589	18047.8	-15033.2
221018-31A	4.73093	0	-14584.1
221018-31B	4.70571	4155.72	-10360
221018-32A	4.86784	13429.3	-1525.64
221018-32B	4.6539	35840	21464.6
221018-33A	5.98201	48795.7	30822.5
221018-33B	5.84396	64712.8	47113.5
221018-34A	5.9256	18103.1	282.606
221018-34B	5.95218	19702.1	1809.6
221018-35A	7.00335	45737.6	24997.5
221018-35B	6.88874	31576.9	11147.3
221020-01A	7.48314	38823.2	16783.3
221020-01B	7.27737	38230.6	16748.2
221020-02A	4.39778	0	-13681.6
221020-02B	4.52558	27442.5	13414.7
221020-03A	6.56386	56953.8	37404.3
221020-03B	6.3989	52949.3	33846.7
221020-04A	8.5207	28122.8	3272.23
221020-04B	8.94984	77045.5	51032.4
221020-05A	5.75374	3758.37	-13596.5
221020-05B	5.57057	0	-16858.7
221020-06A	7.00293	81340.9	60601.9
221020-06B	6.68967	38933.8	19043.5
221020-07A	6.73457	52018.5	32006.5
221020-07B	6.66507	74937.9	55114.2
221020-08A	6.67386	41029.1	21181.7
221020-08B	6.33118	29962.8	11043.6
221020-09A	7.80656	77774.3	54858.3
221020-10A	7.93719	13982.2	-9287.68
221020-10B	8.06467	10983.8	-12631.4
221020-40B	5.96453	3045.97	-14880
221020-41A	7.35901	0	-21703.6
221020-41B	8.6687	31364.8	6113.28
221020-42A	5.45324	18092.2	1551.35
221020-42B	5.45083	62780.2	46245.9
221020-43A	4.03783	37694.1	24987.6
221020-43B	4.24968	0	-13280.4
221020-44A	8.63458	0	-25159.1
221020-44B	8.31608	21402.7	-2893.57
221020-45A	9.33543	30104.5	3046.82
