# Supplementary material for: Testing the ion-current model for flagellar length sensing and IFT regulation
Source: eLife. 2023 Jan 13;12:e82901. doi: 10.7554/eLife.82901 (PMC9891718; doi:10.7554/eLife.82901)
Supplement: Figure 4—source data 1. [file elife-82901-fig4-data1.xlsx]

## Sheet: Data
Control
Name	Number of IFT trajectories	IFT intensity	Average IFT intensity	Average velosity	Median velosity	Pausing duration (s)	Frequency	Unit intensity	Unit background	background	Trajectory intensity	Name	Length	Length (um)
201230-21A	32	17120	474.125	1.44607	1.39201	0.292615	0.837633	17533.5	57703	388.65	488.791	201230-21A	33.67	3.52424
201230-21B	32	17381	462.545	1.23147	1.1918	0.405781	0.708767	17881.7	53552.4	367.774	476.853	201230-21A	34.575	3.61897
201230-22A	29	23634.6	599.553	1.32959	1.34648	0.203364	0.708767	20044.8	69175.3	458.717	560.153	201230-22A	47.468	4.96848
201230-22B	32	20524.7	506.847	1.25033	1.22025	0.496314	0.86985	20833.1	59505.6	414.94	522.526	201230-22B	43.6	4.56361
201230-23A	29	16891.5	408.399	1.36618	1.34299	0.35678	0.7732	13568.3	47970.3	318.098	381.561	201230-23A	56.87	5.95258
201230-24A	23	14692.3	475.997	1.16699	1.16115	0.647788	0.612117	18417.2	55580	380.901	352.706	201230-24A	32.788	3.43192
201230-24B	20	22959	439.684	0.791978	0.724985	1.48991	0.48325	20280.7	50392.5	364.587	283.303	201230-24B	31.938	3.34295
201230-25A	28	16470.8	571.732	0.981051	0.939349	0.432341	0.86985	27087.6	61771.3	455.345	515.74	201230-25A	26.364	2.75952
201230-25B	24	15541.6	536.755	0.854235	0.834575	0.620797	0.612117	20261.6	60227.9	410.966	415.019	201230-25B	28.27	2.95902
201230-26A	35	20785.1	442.576	1.53727	1.5993	0.416821	0.86985	15114.6	51353.2	342.048	499.041	201230-26A	77.078	8.06775
201230-26B	27	18326.8	519.772	1.81939	1.87335	0.296986	0.5799	9914.6	62412.6	377.202	452.124	201230-26B	72.726	7.61223
201230-27A	27	21244.2	458.182	0.951159	0.880472	1.08256	0.547683	14401.4	55659.1	362.623	398.55	201230-27A	55.539	5.81327
201230-27B	16	33559.1	540.457	1.22628	1.0664	1.84299	0.322167	12999.4	63377.7	396.857	278.588	201230-27B	52.664	5.51234
201230-27C	24	21640.4	663.559	1.23793	1.24343	0.362131	0.644333	21706.9	77324.5	510.057	513.064	201230-27C	35.85	3.75242
201230-28A	23	14414.1	418.442	1.24885	1.24911	0.251917	0.662743	15413.1	47545.2	323.346	531.53	201230-28A	58.361	6.10865
201230-28B	38	18694.8	344.387	1.20209	1.09724	0.954339	0.515467	13017.8	39609.5	272.473	421.61	201230-28B	57.628	6.03192
201230-29A	36	26853.9	493.152	1.20525	1.13525	0.561878	0.708767	19119.8	56292.2	387.76	571.958	201230-29A	54.689	5.7243
201230-29B	27	16244.7	361.916	1.26958	1.18895	0.787492	0.740983	15546.4	42360.9	299.263	314.813	201230-29B	56.799	5.94515
201230-52A	29	20661.8	401.122	1.10051	1.1023	0.708208	0.5799	14953.9	45686.3	311.478	374.761	201230-52A	61.676	6.45563
201230-52B	25	24644.7	397.228	0.828218	0.741845	1.59131	0.354383	12316.2	45828.8	299.305	319.934	201230-52B	58.095	6.0808
201230-53A	38	15559.9	443.274	1.48666	1.4757	0.358047	0.708767	14976	52194.8	346.714	542.671	201230-53A	47.938	5.01767
201230-53B	33	19893.4	483.864	1.39937	1.33808	0.517331	0.7732	15228.5	54408.7	356.287	514.42	201230-53B	48.767	5.10444
201230-54A	32	20489.3	542.546	1.49877	1.44839	0.64828	0.708767	23381.1	62539.7	439.635	559.329	201230-54A	44.21	4.62746
201230-54C	29	17055.6	290.255	1.13095	1.05347	1.08818	0.612117	10943.2	34522.9	235.062	271.181	201230-54C	59.669	6.24555
201230-55A	56	14136.8	361.209	1.8311	1.75405	0.223561	0.708767	10406	47046.8	302.817	651.67	201230-55A	94.587	9.90042
201230-56A	35	16519.2	364.672	1.594	1.51163	0.481856	0.612117	12096.9	45820	303.526	411.199	201230-56A	86.269	9.02978
201230-57A	51	13557.3	331.911	2.27048	2.1257	0.286053	1.03093	10279.6	42368.3	274.209	545.346	201230-57A	83.59	8.74937
201230-57B	36	16979.8	386.12	1.5399	1.47807	0.531701	0.740983	12757.7	47995.7	317.638	447.822	201230-57B	85.122	8.90972
201230-58A	44	23865	389.227	1.87908	1.85729	0.344495	0.7732	11882.8	47644.3	308.555	551.743	201230-58A	107.157	11.2161
201230-59A	38	20002.7	367.246	1.36708	1.31509	0.876739	0.3866	10412.7	43568.9	278.873	449.594	201230-59A	101.119	10.5841
201230-60A	43	19268.8	356.251	1.40341	1.35351	0.705013	0.805417	10657.2	41154.1	267.647	493.52	201230-60A	93.088	9.74352
201230-60B	36	29092.9	441.13	1.24832	1.17271	1.47439	0.67655	12625.5	47466.3	305.458	511.623	201230-60B	94.358	9.87645
201230-81A	45	23112.3	426.218	2.10606	2.03795	0.217279	1.12758	13686.8	51309.7	337.837	617.91	201230-81A	86.748	9.07991
201230-81B	46	19689.8	470.852	2.00434	2.01845	0.174318	0.7732	14113.5	54896.3	357.34	697.786	201230-81B	85.564	8.95598
201230-85A	25	26835.5	456.857	1.41714	1.40006	0.887739	0.46392	11323.5	50293.1	316.714	441.552	201230-85A	74.912	7.84104
201230-85B	35	23844.5	417.34	1.51139	1.4702	0.691745	0.69588	13085.8	47447	312.256	564.703	201230-85B	80.843	8.46184
201230-86A	44	20469.1	379.868	1.8798	1.82013	0.21869	0.612117	9184.05	46801.1	293.074	538.475	201230-86A	103.123	10.7939
201230-87A	46	17581.7	378.057	1.74645	1.75932	0.165321	0.837633	11862.7	48982.1	319.58	560.268	201230-87A	73.628	7.70664
201230-87B	34	16136.8	323.603	1.62655	1.59774	0.290618	0.837633	8601.74	41934.4	265.867	354.464	201230-87B	72.206	7.5578
201230-90A	37	15767.2	366.469	1.57927	1.49098	0.332769	0.67655	9593.01	44718.4	281.229	436.837	201230-90A	75.591	7.91211
201230-90B	36	18355.6	364.854	1.51546	1.46589	0.875151	0.3866	10276.8	44865.8	287.138	423.158	201230-90B	72.604	7.59946
201230-91A	39	32828.8	585.15	1.68705	1.62376	0.466924	0.5799	17390.7	67290.9	437.381	735.212	201230-91A	88.081	9.21944
201230-91B	45	27945.4	506.743	1.6067	1.60433	0.406967	0.5799	15806.5	62101.7	407.399	734.651	201230-91B	89.752	9.39434
201230-92A	47	26107.3	539.963	2.17518	2.15522	0.102365	0.67655	12816	66747.6	415.015	817.602	201230-92A	106.166	11.1124
201230-94A	54	26149.9	402.048	1.45761	1.39002	0.684026	0.740983	14516.8	44699	303.428	699.443	201230-94A	112.648	11.7909
201230-94B	47	18108.6	306.857	1.90022	1.87829	0.487612	0.67655	8115.34	38442.2	242.58	464.638	201230-94B	113.251	11.854
210701-02A	23	10910.4	591.259	1.0171	0.989615	0.294654	0.740983	23927.3	66475.2	461.908	438.113	210701-02A	21.754	2.27692
210701-02B	26	14782.8	695.777	1.1172	1.10499	0.290501	0.7732	28054.3	72835.2	505.441	582.806	210701-02B	23.418	2.45108
210701-04C	25	14228.8	315.973	1.43977	1.35151	0.573202	0.434925	9716.19	40338.2	261.519	381.734	210701-04C	60.327	6.31423
210701-04D	23	14599.2	295.844	1.69369	1.63323	0.409366	0.5799	8580.09	37433.9	239.645	328.823	210701-04D	64.58	6.75937
210701-05A	37	21702.8	546.909	1.62897	1.66778	0.285231	0.998717	19981.3	61263.9	414.83	651.925	210701-05A	51.272	5.36647
210701-05B	30	12704.5	409.922	1.48305	1.48369	0.241421	0.902067	15155.9	47546.6	322.925	396.19	210701-05B	49.268	5.15672
210701-06A	34	17552.5	394.418	1.69944	1.59774	0.302791	0.67655	13253.8	46112.7	305.14	432.033	210701-06A	63.606	6.65743
210701-06B	40	16417.3	368.382	1.38375	1.39855	0.429384	0.7732	11023	41987.8	271.788	474.722	210701-06B	63.69	6.66622
210701-06C	26	19037.9	386.775	0.928036	0.855975	1.15007	0.805417	16835.5	41049.1	292.708	323.975	210701-06C	39.071	4.08943
210701-07A	35	21677.2	676.81	2.00955	1.98082	0.243884	0.934283	22822.5	78130.2	519.95	763.16	210701-07A	46.311	4.84722
210701-07B	38	9650.09	386.126	1.95945	1.98816	0.0639856	0.86985	12975	45295.2	301.44	472.709	210701-07B	45.984	4.81299
210701-08A	24	26512.7	625.91	0.974862	0.952596	0.696241	0.5799	24591.3	70219.9	483.334	483.954	210701-08A	35.48	3.71357
210701-08B	23	26247.7	516.278	1.11817	1.01161	0.778245	0.612117	21617	54005.8	377.977	382.553	210701-08B	35.768	3.74372
210701-09A	26	12547.2	512.736	1.75281	1.7314	0.129333	0.805417	14206.5	61339.9	392.254	429.485	210701-09A	42.717	4.47105
210701-09B	34	19836.2	815.427	1.81193	1.74948	0.161285	0.805417	25108.3	93855.1	612.638	893.192	210701-09B	41.758	4.37067
210701-09C	41	17323	443.415	2.28452	2.27776	0.122393	0.805417	14835.7	51286.6	341.24	585.699	210701-09C	49.633	5.19492
210701-10B	22	19394.6	627.256	0.710257	0.662142	0.844189	0.67655	30972.8	66559.7	494.362	444.578	210701-10B	23.39	2.44815
210701-11A	38	16927.5	800.735	1.65973	1.69755	0.085768	1.19202	35214.4	89453.9	641.55	980.286	210701-11A	26.414	2.76467
210701-11B	28	22730.9	932.857	1.21098	1.18864	0.280837	0.86985	40451.6	107795	767.4	841.499	210701-11B	24.868	2.60285
210701-12A	36	27724	681.947	1.22796	1.24601	0.597804	0.7732	27669.1	75630	526.852	790.922	210701-12A	39.464	4.13057
210701-12B	24	21427.9	497.54	1.11205	1.12963	0.439731	0.67655	16353.9	53579.4	354.24	384.698	210701-12B	40.111	4.19828
210701-13A	30	17348.6	385.29	1.20615	1.19145	0.394896	0.708767	13683.9	45321.3	304.346	372.382	210701-13A	47.095	4.92928
210701-13B	21	17294.9	318.835	0.985077	0.934532	0.948439	0.48325	11101.6	38893.8	259.705	215.708	210701-13B	51.722	5.41357
210701-14A	39	15200.6	307.306	2.54027	2.57268	0.0490801	0.998717	9549.86	38510.2	251.702	386.115	210701-14A	72.43	7.58101
210701-14B	36	13141.8	282.546	2.39314	2.40912	0.228488	0.9665	7195.36	34465.5	217.759	327.697	210701-14B	71.692	7.50376
210701-15A	37	21517.9	701.03	1.90571	1.94484	0.0894842	1.19202	26144	72248.2	493.385	835.64	210701-15A	40.382	4.22665
210701-15B	14	19236	696.644	0.933106	0.85264	0.598625	0.418817	19636.1	82493.8	529.751	314.21	210701-15B	28.289	2.96092
210701-16A	42	11644.1	336.885	2.06185	2.06536	0.0541965	1.03093	11568.5	41367.4	275.055	455.839	210701-16A	55.101	5.76724
210701-16B	39	13404.2	357.523	1.8523	1.87536	0.17377	1.06315	12422.4	41402.1	276.802	449.209	210701-16B	54.158	5.66854
210701-17A	36	11703	289.417	2.01096	1.99511	0.0833477	0.934283	8269.28	36243.9	233.257	335.666	210701-17A	61.216	6.40727
210701-17B	33	11344.2	281.756	2.24535	2.2756	0.0501654	0.998717	7724.02	34360.9	219.467	299.549	210701-17B	61.185	6.40403
210701-18A	25	28292.7	622.824	1.53341	1.46481	0.231764	0.740983	17892.2	70312	452.291	501.633	210701-18A	42.628	4.46173
210701-19A	24	27709.3	867.815	1.14833	1.16709	0.694085	0.612117	39161.3	92619.6	656.715	670.995	210701-19A	25.255	2.64336
210701-19B	22	22766.1	573.856	1.22812	1.15875	0.966468	0.644333	22993	56268	387.431	406.73	210701-19B	30.103	3.15078
210701-20A	27	21711.7	565.219	1.09574	1.10153	0.411948	0.708767	21613.1	59974.5	410.891	491.656	210701-20A	39.055	4.08776
210701-20B	27	29765.1	665.515	0.909558	0.906699	0.747255	0.644333	25446.7	67739.8	463.388	578.898	210701-20B	37.064	3.87937
210701-26A	34	17851.4	367.472	1.84537	1.85461	0.413864	0.7732	12033	45118.3	296.966	402.516	210701-26A	81.743	8.55577
210701-26B	37	16121.1	365.249	1.95282	1.93755	0.246082	0.7732	10807.2	46657.7	301.526	435.383	210701-26B	75.805	7.93426
210701-26C	42	15690.3	298.639	1.77392	1.7386	0.36829	0.612117	9010.95	36564.2	236.801	404.089	210701-26C	91.09	9.53409
210701-26D	45	18415.8	309.647	1.44716	1.40951	0.821981	0.740983	11991.6	36352.7	249.581	448.911	210701-26D	91.24	9.54979
210701-27A	35	15006	364.86	1.47024	1.44034	0.342916	0.3866	9796.17	45942.5	292.097	411.41	210701-27A	80.284	8.40306
210701-27B	41	19083.1	335.161	1.10068	1.05602	0.828991	0.644333	11012.2	40509	267.13	442.709	210701-27B	80.536	8.42943
210701-28A	36	11580.1	245.992	1.77527	1.75673	0.365005	0.612117	7425.81	31934.3	207.361	285.301	210701-28A	98.155	10.2736
210701-28B	40	13312.7	261.357	1.82221	1.80403	0.237972	0.7732	7450.59	33681.8	216.331	336.802	210701-28B	102.934	10.7738
210701-28C	36	25376.9	311.196	1.26963	1.11839	1.04759	0.515467	10785.3	37118.7	247.357	360.926	210701-28C	89.983	9.41822
210701-28D	40	21336.6	316.793	1.1431	1.06724	1.22995	0.354383	10895.4	38600.5	256.606	408.24	210701-28D	88.355	9.24782
210701-28E	52	14243.6	309.08	2.03806	2.02159	0.144256	0.902067	11477.6	38798.2	263.108	517.792	210701-28E	102.404	10.7183
210701-28F	56	15079.5	305.237	1.92358	1.89195	0.171828	0.740983	9707.84	39148.2	257.577	550.688	210701-28F	95.462	9.99169
210701-28G	46	16627	318.179	2.16097	2.17056	0.055107	1.09537	11425.5	37353	251.964	471.53	210701-28G	89.149	9.33093
210701-28H	36	14092.3	326.248	1.9201	1.91924	0.254354	0.837633	10907.1	39493.3	262.082	378.382	210701-28H	84.153	8.80801
210701-28I	24	16869.2	244.675	1.02594	1.01161	0.657441	0.644333	5062.04	29736.9	183.133	189.183	210701-28I	86.798	9.08486
210701-28J	30	10056	222.15	1.10176	1.07905	0.696672	0.48325	7067.24	28893	189.685	214.708	210701-28J	87.333	9.14085
210701-29A	36	13294.1	319.894	1.98837	2.00776	0.126459	0.805417	9152.84	40212.3	258.754	371.013	210701-29A	78.406	8.20649
210701-29B	49	11758.2	268.666	2.08025	2.0824	0.0496215	1.03093	9315.28	34753.9	232.278	424.12	210701-29B	75.374	7.88915
210701-29C	38	13058.7	256.561	2.64832	2.60799	0.00680698	0.837633	6909.33	33441.7	212.616	314.09	210701-29C	86.758	9.08067
210701-29D	41	16760.1	322.065	2.56583	2.49283	0.00630891	1.06315	10594.6	37403.9	248.034	425.41	210701-29D	88.469	9.25976
210701-30A	46	14189.4	331.783	1.9578	1.96237	0.134956	0.7732	10899.6	40921.3	269.68	491.691	210701-30A	82.829	8.66944
210701-30B	37	14919.1	343.342	2.06356	2.03142	0.159394	0.708767	10577.5	40956.4	267.637	409.27	210701-30B	85.041	8.90096
210701-30C	39	20112.5	339.272	1.32319	1.33843	0.558452	0.805417	10987.5	40235.4	265.007	426.278	210701-30C	77.288	8.08948
210701-51A	43	16572.1	293.641	1.74012	1.76914	0.374162	0.837633	7298.11	35077.3	221.259	406.786	210701-51A	97.019	10.1547
210701-51B	47	16974.3	327.005	1.67765	1.62503	0.276277	0.515467	10306.8	38811.5	253.963	495.145	210701-51B	101.422	10.6155
210701-51C	50	10373.6	237.442	1.68897	1.62531	0.376617	0.934283	8519.54	29604	199.353	382.479	210701-51C	80.925	8.47015
210701-51D	39	14500.8	260.423	0.951266	0.890807	1.06517	0.67655	7381.73	30602.6	197.262	327.208	210701-51D	80.301	8.40484
210701-51E	55	17180.3	289.803	2.39742	2.38831	0.136387	0.9665	10381.3	34165.7	231.248	513.506	210701-51E	108.429	11.3489
210701-52A	44	13847.7	233.734	1.38752	1.34728	0.806565	0.7732	7121.57	28997.7	188.816	331.326	210701-52A	91.818	9.61028
210701-52B	40	12282.4	209.548	1.78241	1.78717	0.276772	0.612117	5999.34	27402.5	176.252	270.037	210701-52B	88.265	9.2384
210701-52C	39	8416.86	219.446	2.18901	2.13086	0.0809158	0.547683	5701.69	28345.3	179.015	275.723	210701-52C	79.588	8.33021
210701-52D	39	17678.2	341.584	1.40636	1.37215	0.631409	0.805417	10104.9	39714.9	257.305	429.183	210701-52D	82.541	8.63929
210701-52E	53	11771.3	264.233	2.35846	2.29838	0.0185458	0.934283	9789.97	33520.8	227.603	451.174	210701-52E	117.895	12.3397
210701-52F	37	17678.9	274.726	2.18711	2.1344	0.166385	0.644333	7295.22	34414.1	218.725	327.478	210701-52F	114.98	12.0346
210701-53A	45	13027.4	289.753	1.94071	1.94228	0.141404	1.03093	9241.17	34915.5	228.878	420.069	210701-53A	76.179	7.9734
210701-53B	49	16924.7	376.748	1.75763	1.75483	0.114024	1.19202	13205	42180.2	282.436	594.74	210701-53B	74.712	7.81986
210701-53C	50	16928.4	315.194	2.12011	2.12539	0.057941	0.9665	8797.62	38602.6	247.752	507.725	210701-53C	103.095	10.7906
210701-53D	57	17414	312.101	2.42536	2.41425	0.088037	0.998717	10267.3	36582.9	241.937	573.126	210701-53D	105.562	11.0488
210701-53E	53	15745.8	290.483	2.59537	2.58341	0.0253785	1.1598	9895.11	35116.5	235.08	495.995	210701-53E	94.294	9.86944
210701-54A	39	18560.6	325.351	2.06334	2.1127	0.256012	0.86985	9276.08	38633.9	249.378	408.787	210701-54A	84.573	8.85197
210701-54B	46	13421.2	288.278	1.90991	1.95724	0.150701	0.998717	8446.97	34775.6	225.872	427.219	210701-54B	83.579	8.74794
210701-55A	59	12701.2	256.994	2.22247	2.20753	0.093821	0.998717	9045.17	31278.2	209.527	488.489	210701-55A	95.607	10.0069
210701-55B	54	14323.2	262.41	2.10314	2.09815	0.229925	0.934283	9013.34	32628	217.683	456.515	210701-55B	91.094	9.53451
210701-56A	44	17650.6	372.527	2.56936	2.52442	0.123454	1.03093	12906.9	43986.2	293.829	528.07	210701-56A	103.13	10.7943
210701-56B	52	15973.1	309.513	2.33674	2.26509	0.30045	0.998717	10234.8	35184.1	233.467	518.518	210701-56B	101.003	10.5716
210701-56C	38	12796.4	309.439	1.57918	1.58054	0.28317	0.805417	10611	37008.4	247.21	378.826	210701-56C	60.616	6.34447
210701-56D	41	11341.2	336.414	1.88761	1.90519	0.252356	1.1598	11324.3	37267.7	248.76	444.364	210701-56D	59.509	6.22861
210701-57A	39	17842.3	273.273	2.40636	2.34701	0.122037	0.67655	7253.46	32408.2	206.177	343.354	210701-57A	112.145	11.7378
210701-57B	52	17380.5	302.673	2.42314	2.40257	0.0885431	1.09537	9004.89	35194.9	229.108	507.058	210701-57B	110.218	11.5362
210701-57C	42	12796.3	238.365	2.37479	2.36844	0.139187	0.547683	6301.74	30412	192.967	322.532	210701-57C	99.804	10.4462
210701-57D	53	14231.9	250.566	2.4816	2.43358	0.0810159	0.902067	8018.74	31747.8	208.148	427.838	210701-57D	102.751	10.7546
210701-58A	47	16406.9	298.391	2.29738	2.25495	0.353326	0.934283	8516.41	35284.3	227.014	451.819	210701-58A	102.982	10.7788
210701-58B	50	19957.6	354.682	2.26171	2.26094	0.209002	1.09537	11450.3	41204.3	271.81	571.333	210701-58B	103.722	10.8562
210701-59A	50	16029.2	309.937	2.40721	2.36345	0.0341438	0.998717	8952.56	35923.7	232.758	499.256	210701-59A	102.279	10.7052
210701-59B	41	13504.6	281.5	2.31703	2.34972	0.117346	0.934283	6598.96	32075.9	200.727	371.828	210701-59B	99.123	10.3749
210701-60A	42	14893.4	323.521	2.46455	2.44391	0.258665	0.934283	11216	37262.1	250.266	437.756	210701-60A	84.022	8.7943
210701-60B	43	15622.7	259.756	2.67885	2.67095	0.05053	0.934283	7791.07	31321.6	204.128	359.845	210701-60B	94.221	9.8618
210701-60C	42	13316.4	277.136	2.66927	2.6097	0.0628187	0.644333	7991.69	32715.8	211.403	374.992	210701-60C	99.8	10.4457
210701-60D	47	14954.5	298.399	2.58559	2.50713	0.258665	0.515467	8339.54	35745.7	229.401	451.83	210701-60D	100.547	10.5239
210826-01A	41	13524.1	448.015	1.93989	1.98415	0.0769687	0.934283	16177	52169	352.486	591.776	210826-01A	67.399	7.05443
210826-01B	47	9418.05	317.865	2.13825	2.14769	0.0649415	1.06315	11895.8	38908.2	264.955	481.306	210826-01B	63.681	6.66528
210826-02A	19	20310.6	333.652	0.807659	0.77734	1.34778	0.418817	9279.52	36194.8	232.134	204.234	210826-02A	46.358	4.85214
210826-02B	18	17703.1	294.731	0.597758	0.595724	1.69569	0.451033	7917.1	32156.8	204.971	170.915	210826-02B	45.85	4.79897
210826-04A	27	20769.6	524.933	0.937437	0.914193	0.758752	0.644333	22750.7	56562.7	401.549	456.613	210826-04A	33.113	3.46583
210826-04B	30	11952.9	346.708	1.16642	1.12626	0.360407	0.708767	13459.7	38985.5	269.151	335.093	210826-04B	37.654	3.94112
210826-05A	51	18056.4	340.227	1.69201	1.62281	0.759766	0.612117	12298.7	38884.8	262.229	559.009	210826-05A	88.944	9.30947
210826-05B	48	10865.8	237.245	2.02853	2.04921	0.113166	1.12758	7364.23	30031.1	195.855	366.875	210826-05B	89.346	9.35155
210826-05C	42	16574.7	438.233	1.83306	1.84257	0.131796	0.998717	16076.5	50312.2	341.008	592.973	210826-05C	54.785	5.73416
210826-05D	30	11128.3	392.897	1.45952	1.4629	0.272461	0.805417	14253.6	46220.3	312.467	379.735	210826-05D	54.918	5.74808
210826-05E	45	12603.6	369.025	2.29051	2.27949	0.144853	1.12758	13336.4	44206.1	299.173	534.994	210826-05E	94.273	9.86724
210826-05F	34	8747	280.095	2.51688	2.56323	0.0106509	0.998717	8418.4	35551.9	230.861	306.807	210826-05F	98.609	10.3211
210826-06A	29	12539.1	339.947	1.1827	1.14416	0.328237	0.837633	10841.9	38815.8	257.133	317.607	210826-06A	44.126	4.61852
210826-06B	27	17445.7	316.654	0.950008	0.906699	0.913951	0.740983	11456.5	37777.4	255.722	275.441	210826-06B	48.234	5.04849
210826-07A	39	12503	304.475	2.33148	2.33188	0.0915277	0.902067	10207.3	38405.4	254.676	382.558	210826-07A	60.752	6.35871
210826-07B	43	16728.9	403.815	2.23967	2.23926	0.0397021	1.1598	13122.3	47185.9	311.146	559.411	210826-07B	61.793	6.46767
210826-08A	40	16993.8	471.448	2.00948	1.9779	0.102173	1.03093	17986.8	56671.8	387.617	607.539	210826-08A	45.142	4.72486
210826-08B	40	21522.2	676.955	1.55391	1.5212	0.221159	0.9665	26966.5	79383.4	548.572	872.369	210826-08B	40.603	4.24978
210826-09A	35	15699	465.538	1.67453	1.66819	0.0783386	0.9665	16538.4	53698	361.543	524.933	210826-09A	41.236	4.31603
210826-09B	33	16055.6	588.16	1.69347	1.75652	0.0768158	0.9665	20592.7	66137.8	443.551	625.302	210826-09B	39.743	4.15977
210826-10A	35	14294.5	451.618	1.99253	2.02321	0.0443426	1.03093	14439.3	52307	344.566	509.237	210826-10A	44.51	4.65871
210826-10B	38	12931.2	371.473	1.87174	1.92383	0.0639856	1.09537	12670.9	39230.3	262.358	454.77	210826-10B	46.093	4.8244
210826-31A	30	15618.6	280.495	1.83057	1.79616	0.237972	0.644333	6162.81	39321	241.953	271.099	210826-31A	84.087	8.80111
210826-31B	29	18676.5	231.412	1.66559	1.50171	0.456678	0.612117	6164.98	30885.8	195.529	216.205	210826-31B	90.26	9.44721
210826-31C	35	12051.7	211.41	2.11467	2.03285	0.130072	0.740983	5127.96	28063.2	175.419	238.383	210826-31C	104.046	10.8901
210826-31D	37	15705.2	287.592	2.38613	2.30938	0.0349548	0.612117	7628.98	40669.9	257.22	342.815	210826-31D	102.845	10.7644
210826-32C	34	9853.5	194.913	2.01514	1.99544	0.266273	0.67655	5595.03	26017.7	167.106	213.501	210826-32C	81.209	8.49988
210826-32D	43	11135.9	217.135	1.90702	1.82011	0.127528	0.7732	6990.99	28055	184.405	300.8	210826-32D	82.381	8.62254
210826-33A	40	19703.5	327.031	2.32446	2.36842	0.334972	0.934283	8674.67	36910.5	235.748	421.434	210826-33A	119.053	12.4609
210826-33B	41	9121.54	210.933	2.60698	2.66801	0.0681362	0.9665	6151.35	28223.3	181.78	278.618	210826-33B	121.245	12.6903
210826-33C	42	16664	278.487	2.55476	2.6097	0.0923805	0.805417	9273.03	33745.3	223.957	376.82	210826-33C	89.201	9.33637
210826-33D	53	9909.42	217.104	2.4645	2.44313	0.268426	1.06315	6618.54	27282	178.546	370.702	210826-33D	90.087	9.42911
210826-34A	36	11319.1	313.596	2.41853	2.43582	0.0114962	0.934283	9591.49	38199.8	249.194	363.708	210826-34A	64.157	6.7151
210826-34B	37	16379.6	341.566	2.13636	2.18543	0.370521	0.998717	10955.8	39137.8	258.015	407.153	210826-34B	64.671	6.7689
210826-35A	33	10220.7	513.135	1.5897	1.51588	0.297857	0.902067	18229.1	61029.3	411.412	545.539	210826-35A	44.163	4.62239
210826-35B	39	15964.7	481.962	1.60899	1.62055	0.386008	1.06315	19719.9	51321.8	359.761	605.561	210826-35B	40.922	4.28317
210826-35C	30	7606.88	196.321	2.30819	2.36491	0.0862218	0.805417	5051.04	26629.7	167.928	189.744	210826-35C	77.003	8.05965
210826-35D	37	10557.7	213.748	2.24897	2.30847	0.276842	0.740983	6160.86	27699.2	178.106	254.792	210826-35D	78.961	8.26458
210826-35E	38	9348.93	212.857	2.40747	2.37106	0.127971	0.451033	5163.64	28553.4	177.998	260.586	210826-35E	74.889	7.83838
210826-35F	35	7255.16	225.574	2.21672	2.19422	0.0709482	0.708767	6081.98	32018.7	203.098	254.354	210826-35F	75.636	7.91657
210826-37A	55	14115.6	285.876	2.6176	2.55875	0.0206932	1.06315	8740.98	35540.6	231.406	506.548	210826-37A	118.154	12.3668
210826-37B	42	11461.2	240.933	2.5985	2.55998	0.00246348	1.12758	7276.11	30687.6	199.239	326.006	210826-37B	116.989	12.2448
210826-38A	39	10963.2	270.099	1.88137	1.84597	0.184382	0.86985	7498.16	34593.3	221.468	339.365	210826-38A	72.302	7.56761
210826-38B	41	8489.98	230.711	2.14742	2.10957	0.0201885	0.902067	7022.55	30418.7	197.222	304.742	210826-38B	69.147	7.23739
210826-39A	43	17193	256.474	1.89433	1.80442	0.354913	1.03093	8610.82	32245.4	213.7	355.297	210826-39A	98.536	10.3134
210826-39B	42	12542.6	218.7	2.31638	2.23035	0.649127	0.67655	7493.74	28743.7	190.136	295.922	210826-39B	95.722	10.0189
210826-43A	28	18799.7	522.185	0.933524	0.899607	0.71133	0.67655	23556.1	61527.3	440.098	471.046	210826-43A	30.048	3.14502
210826-43B	24	23409.9	575.391	0.92318	0.902016	0.620797	0.67655	24883.1	63353.4	448.275	444.892	210826-43B	32.05	3.35457
210826-44A	40	28085.8	780.602	1.84815	1.81668	0.200466	1.09537	26046.9	97967.4	650.165	1005.94	210826-44A	47.832	5.00642
210826-45A	41	10419.8	368.565	1.53417	1.4952	0.138796	1.06315	16022	43023	306.077	486.831	210826-45A	31.723	3.32034
210826-45B	34	9149.25	369.516	1.53348	1.53229	0.202368	0.934283	15587.4	42312.6	298.229	404.755	210826-45B	31.073	3.25231
210826-46A	42	15892.7	372.831	2.46574	2.43869	0.0246348	1.19202	11145.6	44965.5	292.551	504.478	210826-46A	74.724	7.82111
210826-46B	40	16388.9	373.565	2.65947	2.66558	0.0297465	1.03093	11379.7	47127.2	306.489	481.401	210826-46B	74.187	7.76491
210826-47A	45	12601.2	374.125	1.93001	1.97151	0.135656	1.1598	13380.5	43790.1	295.419	542.387	210826-47A	71.108	7.44264
210826-47B	42	21788.4	426.894	1.53018	1.54591	0.604784	0.837633	14640.2	48579.7	324.69	577.63	210826-47B	72.151	7.5518
221109-03A	13	74938.1	918.466	0.573826	0.34239	3.46214	0.220914	31837.4	101012	678.162	329.716	221109-03A	30.712	3.21463
221109-03B	10	49469.1	747.849	0.325379	0.242786	2.97465	0.165686	19181.2	100419	631.89	206.513	221109-03B	29.748	3.11372
221109-04A	18	28210.8	470.315	0.65081	0.629444	1.94574	0.358986	18141.3	52710.8	365.63	233.773	221109-04A	44.51	4.65886
221109-04B	16	18929.3	388.541	0.733261	0.723931	1.57139	0.303757	12067.7	48303.3	315.321	171.669	221109-04B	40.833	4.27399
221109-05A	14	48568.9	566.969	0.332703	0.317933	3.83194	0.248529	20309.6	62721.7	427.489	219.19	221109-05A	31.167	3.26225
221109-05B	12	43822.6	533.714	0.607005	0.533903	3.72478	0.220914	20505.1	60633.4	417.934	176.858	221109-05B	26.953	2.82117
221109-11A	41	30027.2	676.354	1.60539	1.65723	0.358346	0.745586	22657.5	81789.2	541.497	765.759	221109-11A	50.466	5.28228
221109-11B	42	27727.5	649.459	1.75653	1.83213	0.328874	0.828429	21061.9	79383	522.935	753.243	221109-11B	50.583	5.29452
221109-12A	52	19682.9	350.229	1.71809	1.63349	0.467587	0.7732	13165.9	43429.1	294.956	502.908	221109-12A	76.024	7.95743
221109-12B	60	15568.3	339.957	1.78098	1.70933	0.285394	0.856043	12209.9	42448.6	284.444	563.26	221109-12B	73.27	7.66917
221109-13A	31	40601.1	913.297	1.41646	1.41299	0.539025	0.745586	26877.6	93575.5	606.091	781.821	221109-13A	45.103	4.72093
221109-13B	34	21386.9	467.011	1.71789	1.66618	0.229756	0.690357	13814.8	55809.7	360.769	438.47	221109-13B	47.708	4.9936
221109-14A	43	21969.7	482.693	1.69502	1.64798	0.257462	0.883657	12087.3	56656.5	358.498	573.156	221109-14A	72.22	7.55927
221109-14B	51	20002	422.97	1.60767	1.5551	0.265766	0.800814	13809.7	51622.7	340.623	595.681	221109-14B	73.44	7.68696
221109-15A	32	24355.6	573.343	1.57277	1.55535	0.197232	0.690357	14814	72394.5	456.681	506.638	221109-15A	49.183	5.14798
221109-15B	48	11481	329.321	1.69935	1.57923	0.233877	0.911271	10484.5	42219.2	277.022	436.511	221109-15B	51.296	5.36915
221109-31A	20	23902.1	284.629	1.26503	1.06219	2.32281	0.248529	5436.53	36700.7	221.461	157.197	221109-31A	75.416	7.89379
221109-31B	25	19184.1	280.044	1.18627	0.954957	1.88308	0.1933	6147.32	37525.8	231.22	193.33	221109-31B	71.218	7.45439
221109-33A	39	40095	462.863	1.23124	1.20009	1.09966	0.552286	13903.5	51413.6	334.875	498.484	221109-33A	96.089	10.0576
221109-33B	48	28803.8	442.453	1.45347	1.39869	0.530264	0.662743	12328.5	53628.2	343.305	586.465	221109-33B	100.948	10.5662
221109-34A	51	25404.6	415.535	1.90213	1.72965	0.700932	0.690357	12578.6	52400.3	339.908	585.21	221109-34A	88.978	9.31333
221109-34B	61	17008.5	452.01	2.28377	2.21558	0.213717	0.994114	17015.7	57689.8	392.153	761.398	221109-34B	88.436	9.2566
221109-35A	53	32181.9	467.952	1.68564	1.70033	0.373845	0.938886	16057.6	50082.9	334.615	684.874	221109-35A	94.437	9.88472
221109-35B	47	16725.4	333.439	1.90105	1.84457	0.326909	0.800814	11849	40719.2	273.755	432.761	221109-35B	96.621	10.1133
ppr2
Name	Number of IFT trajectories	IFT intensity	Average IFT intensity	Average velosity	Median velosity	Pausing duration (s)	Frequency	Unit intensity	Unit background	background	Trajectory intensity	Name	Length	Length (um)
201230-11A	21	26506.1	337.28	0.692868	0.616598	1.68748	0.451033	11876.3	37546.6	250.617	228.187	201230-11A	54.451	5.69939
201230-11B	16	30732.2	370.129	0.8808	0.859866	1.73952	0.418817	10492.4	39207.8	251.424	190.789	201230-11B	56.739	5.93887
201230-12A	10	37177.9	400.733	0.303801	0.28325	4.28867	0.0644333	18112.7	43628.4	312.398	129.103	201230-12A	31.296	3.27575
201230-12B	13	44046.6	425.743	0.29357	0.311264	4.7873	0.161083	23806.7	43037.9	336.075	178.308	201230-12B	29.881	3.12764
201230-13A	18	16860.8	342.846	1.28686	1.28137	0.471346	0.547683	9862.67	36299.8	233.342	198.816	201230-13A	39.582	4.14305
201230-13B	19	21623	444.897	0.917904	0.91577	0.942086	0.451033	15057.4	44743.3	297.242	272.329	201230-13B	36.801	3.85196
201230-14A	12	57585.6	471.09	0.543704	0.523685	5.12588	0.28995	24563.1	51457.6	381.866	182.123	201230-14A	28.948	3.02999
201230-14B	10	43593.2	509.53	0.330369	0.364178	3.82825	0	18742	55872.6	379.316	164.154	201230-14B	27.31	2.85854
201230-15A	23	26080.3	514.166	0.692952	0.589371	1.30007	0.612117	22217.3	53974.3	381.592	380.988	201230-15A	39.418	4.12588
201230-15B	23	15876.6	425.994	1.01738	0.947831	0.64104	0.547683	16152.1	45646	310.309	315.655	201230-15B	39.587	4.14357
201230-16A	26	17111.4	524.756	1.03376	1.01161	0.774006	0.708767	23131.6	57156.2	408.484	439.553	201230-16A	30.287	3.17014
201230-16B	29	13808.3	454.842	1.19691	1.20637	0.55836	0.902067	19812.9	50848.8	360.786	424.951	201230-16B	34.038	3.56276
201230-17A	18	37988.7	533.839	0.701737	0.651924	2.06932	0.48325	20582.9	57414.8	396.208	309.573	201230-17A	50.5	5.28583
201230-17B	16	33646.4	428.406	0.53146	0.493158	2.73862	0.28995	15915.1	46590.9	314.648	220.829	201230-17B	51.539	5.39459
201230-18A	11	19135.4	353.979	0.375827	0.349464	2.22452	0.161083	8486.12	39174.4	242.488	125.444	201230-18A	53.104	5.5584
201230-18B	17	21559.8	258.972	1.00416	0.749779	2.61404	0.225517	7551.54	33548.8	214.862	141.834	201230-18B	54.017	5.65396
201230-19A	19	39665	486.67	0.801521	0.766691	1.5765	0.451033	14919.4	52947.9	343.459	297.899	201230-19A	52.244	5.46838
201230-19B	23	29825.4	452.004	0.829406	0.774099	1.59923	0.515467	17349.6	53056.8	362.129	334.928	201230-19B	42.904	4.49076
201230-20A	33	26496.2	414.946	1.14009	1.02387	0.74621	0.67655	15098	44406.4	300.635	441.15	201230-20A	76.856	8.04452
201230-20B	24	24244.1	406.121	1.24302	1.1212	0.666063	0.612117	11713.5	46035.8	296.156	314.013	201230-20B	72.572	7.59611
201230-32A	22	24963.9	511.756	0.880736	0.846071	1.02761	0.48325	16668.3	50607.1	334.974	362.715	201230-32A	36.414	3.81145
201230-32B	18	24885.6	402.876	0.794189	0.809285	1.45715	0.515467	14526.6	41190	279.05	233.628	201230-32B	37.558	3.9312
201230-33A	27	21570.5	430.483	1.65474	1.6448	0.251001	0.73454	12042.2	48277.7	308.843	449.347	201230-33A	60.276	6.30909
201230-33B	37	25473.9	505.217	1.36878	1.35063	0.500552	0.5799	15361	51725.8	336.697	602.227	201230-33B	62.037	6.49341
201230-34A	30	19015.4	383.171	2.09353	1.80066	0.129333	0.644333	9223.68	46878.3	293.218	370.335	201230-34A	72.887	7.62908
201230-34B	34	21190.8	359.374	1.6387	1.60469	0.541676	0.67655	10550.5	42066.3	271.615	393.646	201230-34B	74.148	7.76107
201230-35A	31	26672.1	424.037	1.42788	1.38035	0.510655	0.5799	11421.5	50792.9	319.946	423.493	201230-35A	73.264	7.66854
201230-35B	33	27665	415.738	1.7663	1.7325	0.280613	0.612117	12567.6	49756.9	321.092	441.991	201230-35B	75.99	7.95387
201230-36A	20	18590.1	404.946	0.851353	0.869982	0.913088	0.5799	11242.4	41749.3	268.827	260.92	201230-36A	53.863	5.63784
201230-36B	18	12214.7	287.131	1.0917	0.989126	0.96281	0.547683	10981.2	35073.3	239.356	166.507	201230-36B	57.07	5.97352
201230-37A	17	24806.8	390.828	0.949806	0.85689	1.05292	0.46392	12609.9	45658.2	301.293	256.86	201230-37A	52.417	5.48649
201230-37B	20	18194.5	377.871	1.4968	1.48706	0.416451	0.61856	10747.1	49423.9	316.348	292.17	201230-37A	54.029	5.65522
201230-38A	26	20793.5	581.639	1.73879	1.71714	0.131322	0.7732	14843.4	73485.7	464.372	487.201	201230-38A	49.191	5.14882
201230-38B	31	21870.1	616.179	1.75967	1.76868	0.0967909	0.7732	17927.9	79705.5	513.972	615.388	201230-38B	48.828	5.11083
201230-39A	23	14925.8	438.247	1.26537	1.22712	0.452102	0.67655	13232.2	47720.3	310.045	324.734	201230-39A	39.046	4.08694
201230-39B	26	14408.1	394.579	1.27978	1.22884	0.59294	0.7732	15120.7	44576.2	307.216	330.512	201230-39B	40.366	4.22511
201230-39C	36	18894.7	442.746	1.37707	1.35443	0.373628	0.837633	14098.8	50437.5	332.193	513.496	201230-39C	62.255	6.51623
201230-39D	34	13542.2	370.637	1.74054	1.7356	0.0897721	0.805417	11653.9	44844.8	293.375	405.984	201230-39D	59.786	6.2578
201230-39E	28	10250.1	328.985	1.76426	1.82992	0.206932	0.837633	10638.7	39364.3	259.015	296.766	201230-39E	44.61	4.66933
201230-39F	24	12132.7	350.053	1.24325	1.25186	0.428953	0.67655	12262.7	40760.6	274.469	270.661	201230-39F	40.162	4.20376
201230-61A	43	15032.3	313.962	2.0629	2.06948	0.168433	0.67655	9122.4	39393.9	252.825	434.937	201230-61A	84.61	8.85613
201230-61B	43	15693	355.472	2.31416	2.24436	0.0397021	0.5799	10399.6	45343.5	292.763	492.442	201230-61B	85.022	8.89925
201230-62A	46	21409.8	469.803	1.7531	1.75932	0.253042	0.805417	16127.1	55108.1	367.031	696.232	201230-62A	73.416	7.68445
201230-62B	42	18867.2	408.894	1.95023	1.92125	0.152736	0.86985	12142.1	46662	302.321	553.274	201230-62B	69.265	7.24997
201230-62C	35	12873.3	346.689	1.81349	1.86376	0.184761	0.902067	10586.3	43141.7	279.322	390.921	201230-62C	51.71	5.41249
201230-62D	35	12874.9	305.527	1.73897	1.68216	0.195108	0.837633	10027	36322.3	239.958	344.507	201230-62D	54.019	5.65417
201230-63A	37	22524.3	385.373	1.42239	1.38162	0.792774	0.612117	9497.79	40434.2	253.38	459.37	201230-63A	93.545	9.79136
201230-63B	42	19044.1	308.747	2.21823	2.19021	0.0726726	0.902067	9204.58	36554.4	236.991	417.766	201230-63B	96.554	10.1063
201230-63C	32	21520.5	359.117	1.5747	1.55535	0.409014	0.740983	8257.67	39481.7	246.118	370.226	201230-63C	88.77	9.29156
201230-63D	43	15349.7	317.392	1.62624	1.42213	0.457176	0.612117	7926.89	37235.1	234.665	439.688	201230-63D	91.8	9.60871
201230-64A	42	17098.6	362.117	1.72053	1.60291	0.315325	0.7732	11843.2	48030.5	314.469	489.98	201230-64A	89.084	9.32442
201230-64B	37	16641	345.384	1.64514	1.59852	0.464199	0.740983	11817.5	42819.2	284.373	411.704	201230-64B	87.385	9.14659
201230-65A	35	10648.8	299.218	1.73235	1.63784	0.348829	0.805417	11191.2	37199.1	253.292	337.393	201230-65A	77.935	8.15746
201230-65B	34	12938.7	260.152	1.58603	1.49906	0.473205	0.7732	8405.71	31348.2	206.637	284.962	201230-65B	79.732	8.34555
201230-65C	35	23254.9	404.591	1.52373	1.48465	0.563151	0.612117	12612.7	45527.6	297.724	456.21	201230-65C	72.024	7.53875
201230-65D	33	25577.8	385.344	1.06511	1.01161	1.16791	0.5799	12190.6	41104.2	270.713	409.678	201230-65D	75.802	7.9342
201230-66A	35	22756.9	446.62	1.91361	1.85895	0.390215	0.902067	12103.6	50847.9	324.034	503.601	201230-66A	83.781	8.76936
201230-66B	52	17909	399.897	2.00017	1.98041	0.168132	1.06315	12874	46834.6	308.571	669.935	201230-66B	82.464	8.63151
201230-66C	33	21758.7	390.089	1.42995	1.44231	0.628635	0.708767	8871.69	43288.5	270.351	414.723	201230-66C	88.987	9.31427
201230-66D	32	14667.3	273.884	1.71874	1.73027	0.223099	0.515467	6717.37	35257.5	221.109	282.356	201230-66D	84.813	8.87738
201230-67A	33	13843.8	283.807	1.38336	1.32837	0.321372	0.644333	7435.16	35192.2	222.196	301.73	201230-67A	78.118	8.17661
201230-67B	39	12877.6	271.423	1.66581	1.63975	0.172444	0.7732	7856.57	34192.8	220.388	341.03	201230-67B	77.613	8.12375
201230-67C	26	16948.4	241.065	1.22286	1.16918	1.24159	0.418817	7723.71	29605.7	193.507	201.924	201230-67C	80.163	8.39066
201230-67D	35	14588.5	252.002	1.46616	1.3016	0.841032	0.418817	7921	33148	215.4	284.153	201230-67D	84.583	8.8533
201230-68A	16	12777	419.853	0.68093	0.72077	0.830962	0.451033	17308.5	47912.2	335.762	216.42	201230-68A	26.387	2.76193
201230-68B	20	10385.4	395.237	0.809929	0.758705	0.66477	0.644333	16408.2	40789.6	287.007	254.664	201230-68B	25.578	2.67725
201230-68C	26	16288.2	302.055	1.39837	1.35011	0.708345	0.547683	8169.53	35759.6	226.669	253.011	201230-68C	68.602	7.18057
201230-68D	34	13259.7	276.534	1.97908	1.98503	0.28301	0.708767	7563.26	35614.9	226.171	302.906	201230-68D	64.835	6.78628
201230-68E	38	17595.7	365.868	1.37186	1.38342	0.52686	0.708767	13445.5	41016.3	277.826	447.908	201230-68E	54.581	5.71299
201230-68F	26	8748.83	210.334	1.83041	1.82608	0.208922	0.547683	4838.03	29162	181.07	176.183	201230-68F	55.069	5.76407
201230-69A	48	21957.6	463.12	2.112	2.0752	0.129333	1.03093	13323.7	55134.1	355.064	716.169	201230-69A	89.803	9.39968
201230-69B	38	18411.5	377.237	2.14738	2.10796	0.130694	1.06315	10147.2	41669.2	265.815	461.826	201230-69B	85.621	8.96195
201230-70A	42	22151.7	430.763	2.04162	2.00595	0.0394157	0.740983	12585.2	52782.3	340.124	582.865	201230-70A	94.203	9.86023
201230-70B	42	21079.6	375.984	2.00331	1.9911	0.125637	0.86985	12074.2	44247.8	291.036	508.745	201230-70B	93.753	9.81313
201230-70C	22	19645.3	352.417	0.990789	0.938035	0.827729	0.48325	10923.2	42165.8	275.065	249.781	201230-70C	48.075	5.03201
201230-70D	28	17209.6	320.547	1.10103	1.11638	0.526569	0.740983	11305.8	36113.3	241.635	289.155	201230-70D	52.385	5.48314
210701-21A	18	29008.4	514.57	0.409028	0.359682	1.97448	0.354383	22020	50235	354.979	298.399	210701-21A	33.873	3.54537
210701-21B	16	24402.6	373.69	0.398088	0.354062	2.40882	0.354383	17911.7	37558.4	275.019	192.625	210701-21B	30.64	3.20699
210701-22A	18	23747.7	380.836	0.620419	0.550764	1.9716	0.3866	17962.3	38649.9	281.602	220.847	210701-22A	31.415	3.2881
210701-23A	17	29755.7	532.068	0.528806	0.464149	2.02672	0.3866	26195.2	51206.5	380.18	291.405	210701-23A	27.336	2.86117
210701-24A	16	20484.5	351.07	0.553243	0.493158	2.00789	0.3866	15215.2	38896.7	274.937	180.965	210701-24A	27.268	2.85405
210701-24B	9	27480.3	298.856	0.356878	0.314722	3.97195	0.161083	10966	34666.4	235.545	86.6533	210701-24B	29.087	3.04444
210701-25A	24	23779.9	500.967	0.779429	0.724985	1.00017	0.547683	20130	48439.5	333.614	387.348	210701-25A	36.141	3.78276
210701-25B	26	17947.6	375.307	0.880342	0.848193	0.947113	0.515467	17018.9	39949.3	286.273	314.37	210701-25B	35.837	3.75094
210701-31A	32	19823.8	300.295	1.01293	0.933629	1.17369	0.48325	9672.7	38552.3	251.79	309.584	210701-31A	80.392	8.41436
210701-31B	22	24421.5	291.373	0.702495	0.671339	1.93058	0.322167	7675.59	34662	218.045	206.515	210701-31B	78.763	8.24386
210701-31C	20	19547.7	356.831	1.20934	1.23416	0.592344	0.644333	11845.3	41438.9	274.828	287.398	210701-31C	52.451	5.48987
210701-31D	25	24045.3	449.553	1.02758	1.07635	0.573202	0.724875	17163.4	54397.2	371.783	452.597	210701-31D	51.906	5.43283
210701-32A	23	18831.6	355.197	0.824093	0.791692	0.843474	0.5799	12272.8	37371.5	250.606	263.195	210701-32A	50.199	5.25416
210701-32B	16	21975.9	313.497	0.637815	0.657544	1.63282	0.418817	8668.4	35810.8	228.125	161.597	210701-32B	49.116	5.14081
210701-32C	36	18662.5	409.554	1.2732	1.24624	0.668219	0.740983	11876.7	45662.8	294.91	475.001	210701-32C	69.314	7.25487
210701-32D	40	12321.3	307.778	1.59839	1.48845	0.184946	0.740983	10187.9	38540.3	254.61	396.623	210701-32D	69.334	7.25696
210701-34A	22	12849.5	377.887	1.37233	1.42545	0.223393	0.81186	13743.2	40751.3	276.199	321.4	210701-34A	50.65	5.30137
210701-34B	27	16598.7	369.735	1.21212	1.19519	0.329559	0.81186	13696.8	40445.4	275.622	385.937	210701-34B	49.316	5.16174
210701-34C	31	10848.1	220.068	1.45861	1.37056	0.343775	0.418817	6120.46	28889.9	184.798	219.786	210701-34C	69.249	7.24806
210701-34D	23	15627.5	284.475	1.1545	1.13476	0.668031	0.48325	5917.63	35943.5	220.415	210.792	210701-34D	68.205	7.13879
210701-35A	25	22558.8	395.221	1.11981	1.03589	0.629074	0.67655	12105.4	40983.4	267.588	318.317	210701-35A	52.412	5.48579
210701-35B	31	16354.8	335.511	1.45442	1.45541	0.255328	0.708767	10903.9	37548.8	247.134	335.081	210701-35B	54.797	5.73542
210701-36A	26	29652.6	579.508	0.982758	0.98048	0.684468	0.644333	19953.4	56777.7	379.43	485.415	210701-36A	47.089	4.92865
210701-36B	24	23314.8	488.832	1.1674	1.14649	0.541042	0.67655	15891.2	52282.2	345.344	377.965	210701-36B	47.208	4.9411
210701-36C	17	21546.9	480.117	0.578085	0.57126	1.40288	0.451033	22535.3	43962.8	322.776	262.952	210701-36C	23.432	2.45255
210701-36D	21	10092.6	358.645	0.620409	0.568427	0.832656	0.612117	17952.2	37714.7	280.837	242.641	210701-36D	21.326	2.23212
210701-36E	8	17303.3	271.557	0.24834	0.278192	3.18805	0.0644333	9377.9	32075.3	215.511	69.9892	210701-36E	26.083	2.73002
210701-36F	7	18806.3	293.862	0.279223	0.231224	3.03008	0.161083	12451	34822.1	244.111	66.2708	210701-36F	25.372	2.6556
210701-36G	27	9840.06	297.02	1.29921	1.32133	0.195436	0.740983	9167.67	36935	240.399	258.362	210701-36G	39.639	4.14888
210701-36H	29	14028.4	311.865	1.32465	1.36276	0.474517	0.612117	11389.9	40527.5	273.648	291.371	210701-36H	41.954	4.39119
210701-37A	27	15307.7	302.691	1.08919	1.09403	0.513498	0.708767	10726.6	36809.3	246.98	263.296	210701-37A	53.274	5.57601
210701-37B	30	10960.9	246.135	1.28185	1.27462	0.267287	0.67655	7811.33	31806	208.001	237.89	210701-37B	57.766	6.04617
210701-37C	18	16937	313.657	1.14362	1.23079	0.586308	0.451033	7314.05	39698.4	245.842	181.89	210701-37C	51.516	5.39201
210701-37D	28	13046	225.166	1.21705	1.15251	0.8887	0.5799	7649.77	30454.5	201.741	203.115	210701-37D	58.545	6.12771
210701-38A	19	40377.4	541.32	0.82074	0.787988	1.65274	0.48325	15092.9	51771.2	335.35	331.351	210701-38A	59.343	6.21123
210701-38B	18	36634.9	426.703	0.488211	0.472083	2.76484	0.354383	13123	47294.2	310.143	247.445	210701-38B	59.631	6.24138
210701-39A	22	11137.3	216.951	1.46915	1.37487	0.159902	0.5799	6305.64	29038.8	186.716	230.652	210701-39A	69.159	7.23864
210701-39B	17	20886.5	353.752	1.61846	1.61857	0.124768	0.821525	9160.63	40535.9	256.816	290.616	210701-39B	65.604	6.86655
210701-40A	32	18987.6	321.719	1.03025	1.02847	1.28201	0.354383	11628.4	40599.8	272.598	331.671	210701-40A	57.627	6.03163
210701-40B	24	32413.3	476.236	0.851933	0.826145	1.25022	0.5799	15662.2	50094.8	331.559	368.225	210701-40B	53.931	5.64478
210701-41A	22	21134.9	344.135	0.776272	0.74491	1.19456	0.48325	12464.3	38354.8	259.34	243.911	210701-41A	43.524	4.55551
210701-41B	18	10012.9	209.03	0.921044	0.929179	0.750129	0.451033	6048.46	29110.3	186.456	121.216	210701-41B	45.676	4.78075
210701-41C	23	18929.7	308.392	0.832676	0.850336	1.13363	0.708767	11504.1	34490.8	235.007	228.513	210701-41C	46.382	4.85465
210701-41D	25	19242.3	318.531	0.910654	0.936748	1.10916	0.612117	13782.3	37005.5	261.891	256.55	210701-41D	45.426	4.75459
210701-43A	26	27646	310.368	1.01537	0.931197	1.93999	0.28995	10875.9	37230	247.957	259.975	210701-43A	74.324	7.77925
210701-43B	26	25515.3	332.051	0.977363	0.964917	1.47837	0.612117	12302.9	37765.2	256.737	278.137	210701-43B	70.136	7.3409
210701-43C	25	23539.7	367.372	0.664041	0.615057	1.80238	0.547683	17453.7	40162.3	290.971	295.888	210701-43C	39.781	4.16374
210701-43D	20	20459.3	362.058	0.660647	0.708125	1.52354	0.644333	15709	38723.9	276.898	233.286	210701-43D	34.343	3.59457
210701-44A	42	17971.6	509.736	1.87837	1.84739	0.0603552	1.09537	18279.1	58715.7	395.994	689.724	210701-44A	49.585	5.1899
210701-44B	32	10109.3	332.38	1.42248	1.41309	0.299082	0.708767	12290.9	38672.3	262.363	342.661	210701-44B	46.453	4.86208
210701-45A	34	12812.4	424.954	1.9475	2.00536	0.0639055	0.934283	13484.1	51287.2	336.17	465.48	210701-45A	47.822	5.00537
210701-45B	39	16675	465.732	1.73481	1.73659	0.0795893	1.09537	18189.5	53246.8	367.377	585.169	210701-45B	47.028	4.92226
210701-63A	37	12104.8	253.792	1.66176	1.65594	0.240489	0.805417	7176.81	31594.6	202.016	302.524	210701-63A	71.126	7.44452
210701-63B	28	13122.5	256.917	1.86489	1.82812	0.21617	0.805417	5997.34	30655.6	190.378	231.756	210701-63B	73.303	7.67238
210701-64A	42	15981.2	389.876	1.76313	1.79038	0.151504	0.934283	13399	43766.7	292.16	527.541	210701-64A	60.624	6.34531
210701-64B	41	19119.8	397.407	1.67418	1.70081	0.227121	0.837633	14703.6	45423.1	308.595	524.928	210701-64B	63.346	6.63021
210701-65A	25	15516.7	344.471	1.18635	1.20584	0.533885	0.740983	12293	37351.5	251.427	277.443	210701-65A	43.174	4.51888
210701-65B	29	17531	351.704	1.1802	1.1023	0.458462	0.644333	12599.2	39965.6	269.118	328.591	210701-65B	45.892	4.80336
210701-66A	35	23698.5	434.367	2.06881	2.02466	0.0886852	0.86985	11365.1	51363.3	326.133	489.785	210701-66A	87.426	9.15059
210701-66B	43	15773.2	367.026	2.15023	2.09065	0.0782011	0.418817	9502.36	42698	271.761	508.447	210701-66B	90.304	9.45182
210701-67B	49	12219.3	346.401	2.38065	2.33048	0.0971315	0.9665	12843.9	41644.6	283.797	546.835	210701-67B	83.438	8.73318
210701-69A	48	18170	347.237	2.49308	2.46755	0.0441887	0.515467	9196.97	38548.2	247.852	536.968	210701-69A	102.87	10.7671
210701-69B	51	18611.6	311.666	2.41768	2.42058	0.0649199	0.934283	10229.2	38020	251.821	512.082	210701-69B	103.284	10.8104
210701-69C	54	16968.4	339.77	2.70458	2.67951	0.0306566	0.902067	12290.2	38715.4	263.287	591.097	210701-69C	74.933	7.84299
210701-69D	52	17689.3	352.351	2.54647	2.51702	0.0785945	0.998717	13524.9	39988.6	274.675	590.282	210701-69D	76.739	8.03202
210701-70A	28	18283.7	375.768	1.62423	1.60231	0.269751	0.86985	11475.3	45682.8	297.756	508.452	210701-70A	82.705	8.65646
210701-70B	30	25132	543.25	2.29208	2.34524	0.0448353	1.11147	15353.4	59817.3	388.603	787.576	210701-70B	84.816	8.87741
210701-70C	45	11440.5	245.144	2.12158	2.13412	0.0770248	0.9665	8185.65	31137.1	207.064	355.398	210701-70C	76.347	7.99099
210701-70D	39	10686	234.022	2.05419	2.05953	0.0968337	0.7732	7035.83	30668.7	199.025	294.037	210701-70D	75.375	7.88925
210701-72A	45	20834.8	406.353	2.25417	2.26338	0.104616	0.9665	14486.1	46828.7	317.607	589.111	210701-72A	80.568	8.43278
210701-72B	45	13875.4	278.194	2.20744	2.21429	0.00919699	1.32088	8573.92	34084.6	223.278	403.312	210701-72B	81.028	8.48093
210701-73A	47	27894.3	444.201	2.54234	2.52758	0.0583373	1.09537	14766.5	51685.5	343.884	672.601	210701-73A	98.375	10.2966
210701-73B	51	21799.7	450.011	2.55598	2.54455	0.0334743	0.5799	12455	48715.5	315.767	739.391	210701-73B	96.333	10.0829
210701-74A	47	25720.6	455.761	2.42611	2.38553	0.0429274	0.837633	14613.7	54096.2	356.877	690.106	210701-74A	92.218	9.65215
210701-74B	58	20224.7	342.757	2.33702	2.26885	0.131117	0.9665	11381.7	42360	280.054	640.465	210701-74B	108.285	11.3338
210701-74C	63	16112.6	310.991	2.40366	2.40029	0.104287	0.902067	12151.7	37463.6	257.656	631.204	210701-74C	87.88	9.19811
210701-74D	64	20988.8	340.568	2.42746	2.3903	0.0646663	1.12758	13356.2	42483.1	293.49	702.206	210701-74D	96.008	10.0488
210701-74E	48	13954.9	326.358	2.28018	2.27892	0.023711	1.06315	12376.5	39484	270.825	504.681	210701-74E	59.561	6.23405
210701-74F	43	14130.1	359.034	2.20176	2.1875	0.0433114	1.03093	12544.2	43713	292.476	497.375	210701-74F	59.638	6.24211
210701-75A	46	14320.1	303.086	1.93435	1.96897	0.0719764	0.644333	9352.03	35341.7	232.015	449.163	210701-75A	79.696	8.34151
210701-75B	43	14960.6	333.617	2.04473	2.05733	0.0433114	0.934283	10910.8	41332.4	272.376	462.165	210701-75B	71.681	7.50261
210701-76A	45	21487.6	373.064	2.15856	2.1285	0.0896706	1.03093	12474.4	44374.6	294.56	540.849	210701-76A	97.187	10.1722
210701-76B	56	18552.5	349.854	2.50079	2.50854	0.0498854	1.1598	13236.6	42275.6	288.586	631.183	210701-76B	95.983	10.0462
210701-77A	40	20210.8	314.582	2.5772	2.57327	0.0349198	1.11147	11732.1	37795.6	257.722	608.088	210701-77A	114.137	11.9463
210701-77B	37	23605.9	337.57	2.60552	2.61241	0.0559276	0.9665	11629.3	39950.9	268.033	603.584	210701-77B	110.276	11.5422
210701-77C	54	15393.5	273.831	2.67083	2.62371	0.0565232	0.837633	9742.19	34309.1	230.845	476.384	210701-77C	97.113	10.1645
210701-77D	55	16386.9	285.989	2.54514	2.49928	0.0206932	1.09537	10303.5	35374.9	239.717	506.749	210701-77D	96.823	10.1341
210701-77E	47	15000.9	318.047	1.9837	1.96689	0.114473	1.28867	10971.4	37549.2	252.796	481.582	210701-77E	87.019	9.10799
210701-77F	53	15101.3	307.381	2.29279	2.26307	0.0468526	1.09537	10337.7	38228.7	253.875	524.847	210701-77F	85.413	8.93989
210701-78A	52	25354	378.837	2.55388	2.52772	0.0368101	0.902067	12744.6	42671	287.932	634.653	210701-78A	113.234	11.8518
210701-78B	60	19343.8	368.075	2.38951	2.39245	0.144853	0.708767	11551.2	44991.9	295.021	711.488	210701-78B	112.418	11.7664
210701-80A	46	15841.5	294.4	2.69757	2.6562	0.0798488	1.12758	9932.03	37140.3	246.709	436.29	210701-80A	107.318	11.2326
210701-80B	51	16007.1	274.705	2.5936	2.61828	0.0284025	0.708767	7964.64	34153.4	220.651	451.354	210701-80B	116.201	12.1624
210701-80C	44	13792.6	371.844	2.19667	2.14813	0.12463	1.09537	13917.2	46650	317.443	527.101	210701-80C	59.1	6.1858
210826-11A	16	15391.4	370.752	0.525954	0.505803	1.45499	0.354383	18314.5	41960.8	308.775	191.11	210826-11A	25.075	2.62452
210826-11B	16	29402.5	467.925	0.551727	0.455223	2.31182	0.3866	24214.6	48654.8	367.81	241.2	210826-11B	26.555	2.77942
210826-12A	31	16764.8	385.488	1.14584	1.15519	0.407189	0.934283	12602.2	42260.2	282.033	384.994	210826-12A	50.059	5.23951
210826-12B	32	13594.1	324.484	1.51046	1.46367	0.218249	0.902067	10549.4	38178	252.269	334.521	210826-12B	51.64	5.40499
210826-13A	17	19197.5	433.391	0.556631	0.57126	1.47287	0.48325	20412.6	43787.5	319.529	237.361	210826-13A	24.282	2.54152
210826-13B	19	16128.3	333.779	0.738156	0.745394	1.2661	0.515467	14118.5	34523.4	243.327	204.312	210826-13B	28.079	2.93894
210826-14A	23	12652.1	288.233	0.853233	0.870861	1.12013	0.612117	12097.1	33068.7	231.019	213.576	210826-14A	35.736	3.74037
210826-14B	24	8772.07	335.75	1.21315	1.2329	0.284532	0.7732	12311.1	37593.5	255.122	259.602	210826-14B	34.42	3.60263
210826-15A	17	25178.1	326.373	0.339309	0.238025	3.21962	0.322167	14605.4	34408.2	246.415	178.749	210826-15A	38.91	4.07258
210826-15B	19	22681.2	410.679	0.651601	0.553721	1.51932	0.3866	14099.6	41152.1	275.769	251.384	210826-15B	36.609	3.83174
210826-17A	37	15865.2	350.485	1.29263	1.23033	0.472588	0.837633	12034.7	41180.5	274.567	417.784	210826-17A	60.282	6.30952
210826-17B	39	14331.6	318.534	1.45266	1.38599	0.41917	0.547683	11157.5	38271.1	256.635	400.223	210826-17B	59.37	6.21406
210826-18A	28	11914.8	407.349	1.13384	1.13444	0.349198	0.644333	16218.3	43687.7	301.316	367.456	210826-18A	33.477	3.50393
210826-18B	30	9355.08	346.773	1.18478	1.16503	0.308674	0.740983	14532.8	35973.7	253.609	335.156	210826-18B	32.371	3.38816
210826-19A	30	9116.68	378.113	1.4073	1.38028	0.168995	0.934283	13572.4	44590.1	301.108	365.446	210826-19A	28.489	2.98185
210826-19B	29	11468.9	368.936	1.37067	1.36044	0.132008	0.902067	13479.1	43524.9	294.902	344.691	210826-19B	32.054	3.35499
210826-20A	22	15988.3	372.263	1.00383	1.00241	0.888868	0.5799	14399.2	39070.2	269.035	263.847	210826-20A	42.134	4.41003
210826-20B	23	12714.3	260.749	0.937519	0.950031	0.755752	0.48325	8587.67	31787.9	208.916	193.211	210826-20B	45.563	4.76893
210826-41A	31	13950.3	409.053	1.30824	1.27919	0.427215	0.7732	13813.8	49258.1	327.192	408.528	210826-41A	44.707	4.67933
210826-41B	31	15518.4	342.498	1.00078	0.978974	0.806034	0.740983	13080.7	39210.5	269.303	342.059	210826-41B	49.023	5.13107
210826-42A	50	17333.3	407.484	1.73402	1.72411	0.277289	0.740983	12473.1	51322.7	333.077	656.39	210826-42A	75.72	7.92536
210826-42B	42	14827.2	297.759	1.79915	1.72535	0.225408	0.9665	8402.67	36995.3	237.646	402.898	210826-42B	80.328	8.40766
EGTA
Name	Number of IFT trajectories	IFT intensity	Average IFT intensity	Average velosity	Median velosity	Pausing duration (s)	Frequency	Unit intensity	Unit background	background	Trajectory intensity	Name	Length	Length (um)
201230-41A	36	24327.2	420.831	1.1442	1.02285	1.11945	0.5799	14639.8	46596.1	312.277	488.079	201230-41A	61.483	6.43543
201230-41B	32	14486	327.776	1.63734	1.6407	0.62888	0.515467	10305.1	41269.6	268.13	337.915	201230-41B	63.156	6.61054
201230-41C	34	20972.9	458.488	1.89997	1.8923	0.104988	0.805417	12249	57950.4	367.99	502.212	201230-41C	71.802	7.51552
201230-41D	33	24581.3	492.129	2.07471	1.99665	0.227312	0.612117	12490.3	65390	411.601	523.206	201230-41D	70.881	7.41911
201230-42A	34	25368.5	498.115	1.35362	1.33592	0.59493	0.7732	18313.7	56590.2	382.117	545.619	201230-42A	50.253	5.25998
201230-42B	37	27081.6	602.606	1.12903	1.13191	0.692104	0.902067	23445.9	61564.8	426.088	718.316	201230-42B	46.023	4.81723
201230-43A	34	27036.9	425.655	1.6068	1.54716	0.492986	0.86985	13338.2	52232.5	341.273	466.248	201230-43A	72.532	7.59192
201230-43B	37	18959.2	490.033	1.69761	1.66748	0.300611	0.7732	16150.6	60401.8	398.439	584.128	201230-43B	69.84	7.31015
201230-44A	18	18324.4	433.56	0.7178	0.741845	1.30482	0.547683	18708.6	50408.1	359.193	251.421	201230-44A	31.89	3.33793
201230-44C	26	9152.97	338.988	1.34936	1.29304	0.535238	0.740983	14184.3	39246.4	276.465	283.948	201230-44C	36.453	3.81554
201230-44D	31	11256.5	459.807	1.45638	1.4293	0.198588	0.902067	18024.1	55094.4	379.081	459.217	201230-44D	37.423	3.91707
201230-45A	27	23608.9	451.431	1.2286	1.12213	1.04424	0.48325	13030.7	57801.5	371.724	392.678	201230-45A	59.292	6.20609
201230-45B	23	25986.3	480.309	1.05712	0.989615	1.17636	0.5799	13704.7	56822.9	365.989	355.901	201230-45B	56.359	5.8991
201230-45C	36	19819.3	398.29	1.24113	1.19707	0.849284	0.708767	12710.9	46427.4	304.079	461.937	201230-45C	69.137	7.23657
201230-45D	43	21030.2	384.256	1.25675	1.24989	0.619594	0.7732	13661.4	44004.2	295.948	532.317	201230-45D	72.27	7.5645
201230-45E	27	16873.8	459.047	1.22445	1.1315	0.565232	0.837633	20233.5	55006.8	388.962	399.302	201230-45E	32.51	3.40282
201230-45F	21	13519.2	462.095	1.0107	0.999564	0.428645	0.547683	16820.5	59660.4	400.856	312.631	201230-45F	31.103	3.25555
201230-46A	32	19276.7	423.843	2.08047	1.91151	0.572297	0.740983	10779.6	55486.4	350.425	436.954	201230-46A	81.731	8.55478
201230-46B	38	13361.8	346.522	2.21278	2.13325	0.272279	0.547683	8295.44	48378	301.159	424.224	201230-46B	85.937	8.99503
201230-46E	24	25785.3	612.885	0.910693	0.868296	1.05622	0.48325	21326.1	75417.4	505.035	473.882	201230-46E	35.78	3.74509
201230-46F	22	19719.3	450.887	0.804025	0.763303	0.884165	0.48325	12934.1	56425	362.047	319.574	201230-46F	41.152	4.30738
201230-46G	36	18256.9	438.123	1.40539	1.34881	0.400931	0.515467	12863.3	57130.4	369.353	508.136	201230-46G	59.027	6.17836
201230-46H	23	9160.19	349.976	1.57364	1.44704	0.454351	0.708767	11225.3	48215.3	316.377	259.326	201230-46H	57.297	5.99728
201230-47A	26	15368.2	364.342	1.42036	1.30601	0.81778	0.644333	12282.3	46416.6	307.713	305.185	201230-47A	48.006	5.02479
201230-47B	27	21544.7	408.369	1.11184	0.9629	1.40254	0.515467	13108.5	48436.1	317.838	355.22	201230-47B	51.577	5.39856
201230-47C	40	12710.3	253.325	1.92024	1.87527	0.497931	0.515467	6854.62	32752.5	207.471	326.452	201230-47C	85.017	8.89873
201230-47D	39	17861.1	349.52	2.05837	1.91903	0.509372	0.5799	9828.08	46346.7	295.695	439.154	201230-47D	85.147	8.91234
201230-47E	30	21332.3	391.848	1.09185	1.05207	0.679427	0.740983	15475.8	44610	307.145	378.722	201230-47E	50.045	5.23821
201230-47F	32	7376.18	232.798	1.46813	1.38512	0.430031	0.67655	8733.83	30116	204.691	240	201230-47F	46.933	4.91248
201230-48A	30	25609.6	484.327	0.84071	0.751961	1.42266	0.515467	19961.4	55359.7	385.153	468.102	201230-48A	50.049	5.23863
201230-48B	31	16332.9	372.062	0.979518	0.903919	1.25995	0.5799	14890.4	42513.1	296.031	371.584	201230-48B	50.582	5.29442
201230-48C	30	12713.5	343.901	1.19032	1.14649	0.510433	0.547683	12472.4	41767.8	282.18	332.38	201230-48C	46.096	4.82487
201230-48D	31	16459.5	386.106	1.33087	1.29225	0.589089	0.805417	14468.1	46167.5	314.171	385.61	201230-48D	44.783	4.68744
201230-48E	27	21037.3	480.73	1.09555	1.06406	0.97718	0.67655	18416.6	55746.4	380.439	418.163	201230-48E	42.712	4.47067
201230-49A	20	20420.4	382.625	1.36377	1.20718	1.27781	0.3866	9211.75	45303.9	283.804	246.538	201230-49A	56.062	5.86801
201230-49B	32	18926.4	302.45	1.07319	0.961026	1.66192	0.451033	11203.6	36065.7	246.354	311.805	201230-49B	57.273	5.99476
201230-49C	23	8208.68	322.489	1.43114	1.35467	0.425111	0.644333	11262.8	43369.4	288.455	238.959	201230-49C	47.271	4.94786
201230-49D	20	20710.2	334.913	1.56365	1.3252	1.46922	0.418817	10911.5	42473.2	279.379	215.795	201230-49D	47.433	4.96481
201230-49E	32	23433.3	403.634	1.31286	1.2055	1.34506	0.547683	12046.4	47297.7	306.483	416.119	201230-49E	72.615	7.60061
201230-49F	38	10449.3	266.91	2.03341	1.88878	0.383914	0.708767	9802.88	34567.5	232.93	326.76	201230-49F	71.398	7.47323
201230-49G	22	8721.75	377.839	1.88698	1.71743	0.225744	0.67655	9714.44	55230.8	347.333	267.799	201230-49G	42.224	4.41959
201230-49H	22	8259.59	284.415	1.266	1.18021	0.566712	0.5799	7929.39	40386.9	256.974	201.584	201230-49H	45.745	4.78813
201230-49I	30	14403.4	316.114	1.7611	1.58429	0.838076	0.418817	6901	38535.7	238.925	305.525	201230-49I	70.522	7.38154
201230-49J	33	14542.4	278.209	1.5887	1.53069	0.669394	0.418817	7414.81	38666.4	244.222	295.778	201230-49J	73.766	7.72109
201230-50A	42	26951.7	472.6	1.68541	1.66594	0.634346	0.7732	16176.3	50194.8	335.646	639.475	201230-50A	72.315	7.56921
201230-50B	40	18468.8	355.269	1.51347	1.52247	0.484997	0.805417	10625	41750.2	269.861	457.823	201230-50B	76.217	7.97763
201230-50C	24	15137.1	322.613	1.3041	1.18864	0.650974	0.515467	10761.9	39258.9	260.582	249.444	201230-50C	51.322	5.37187
201230-50D	25	18866.7	452.401	1.19139	1.14649	0.593895	0.67655	16843.9	52116	353.303	364.371	201230-50D	54.659	5.72116
201230-71C	41	16980.8	379.668	1.71904	1.55689	0.773472	0.515467	10668.8	46137.8	296.386	501.497	201230-71C	92.238	9.65455
201230-71D	34	12946.6	306.156	2.02911	1.84668	0.362131	0.612117	9994.63	39995.6	263.356	335.353	201230-71D	95.552	10.0014
201230-71E	32	23387	439.61	2.09251	1.8504	0.247349	0.708767	8442.03	56071.3	339.184	453.208	201230-71E	96.028	10.0513
201230-71F	38	19300.7	343.669	1.55631	1.43799	0.899883	0.515467	8859.99	44159.1	278.575	420.731	201230-71F	92.527	9.6848
201230-71G	28	16238.9	310.874	1.21925	1.12722	0.899786	0.451033	7850.14	38887.9	244.074	280.429	201230-71G	64.776	6.7801
201230-71H	29	16283.7	365.204	1.12406	1.03602	0.799187	0.515467	7284.21	43819.9	267.576	341.204	201230-71H	67.096	7.02294
201230-72A	33	12348.4	337.002	1.7829	1.67375	0.410729	0.805417	11550.6	45279.9	300.775	358.283	201230-72A	79.808	8.3535
201230-72B	38	26497.8	411.775	1.64478	1.5041	1.051	0.5799	12932.5	51388.2	334.641	504.108	201230-72B	78.655	8.23282
201230-72C	35	16362.5	389.145	1.88849	1.85798	0.242406	0.86985	12824.5	47650.5	314.957	438.794	201230-72C	81.092	8.4879
201230-72D	42	16887.5	352.232	1.32978	1.26246	1.20834	0.48325	13009.1	45330.7	305.415	476.605	201230-72D	80.31	8.40605
201230-72E	42	14730	298.066	1.77473	1.62299	0.496391	0.708767	9417.34	37361.8	244.239	403.313	201230-72E	67.815	7.0982
201230-72F	37	12004	315.973	1.35797	1.24264	0.886453	0.547683	9736.44	40179.8	260.327	376.645	201230-72F	65.62	6.86845
201230-72G	30	29829.2	441.772	1.44073	1.31509	0.720814	0.547683	8744.41	51592.8	314.877	426.972	201230-72G	110.636	11.5803
201230-72H	43	15294.7	324.847	2.19131	2.08046	0.498081	0.612117	9825.02	42042.6	271.866	450.017	201230-72H	114.364	11.9705
201230-73A	55	23774.6	391.909	2.23803	2.18967	0.189061	0.902067	12002.7	48148.3	312.674	694.43	201230-73A	119.474	12.5053
201230-73B	53	21629.2	394.85	2.22979	2.19595	0.162032	1.12758	10435.7	46054.3	292.846	674.2	201230-73B	116.259	12.1688
201230-73C	42	20594.8	418.154	1.72557	1.68588	0.330106	1.03093	12118	45927.5	298.209	565.804	201230-73C	71.493	7.48317
201230-73D	57	20147.8	409.698	1.58358	1.5606	0.361224	0.934283	16244.4	48558	335.326	752.349	201230-73D	70.422	7.37107
201230-73E	43	12594	301.086	2.13639	1.94205	0.415068	0.740983	9527.24	38676.5	253.385	417.1	201230-73E	105.83	11.0772
201230-73F	44	17918.1	331.671	1.59671	1.52316	0.585524	0.86985	11874.4	40386.5	272.037	470.155	201230-73F	99.378	10.4019
201230-74A	42	16574.3	376.795	2.22612	2.189	0.178602	0.7732	11590.1	46845	305.141	509.841	201230-74A	109.161	11.4259
201230-74B	53	25816.7	444.349	1.61836	1.61094	0.627629	0.934283	12830.7	48830.6	315.146	758.718	201230-74B	104.977	10.9879
201230-74C	47	11877.9	291.518	2.20961	2.04581	0.305996	0.3866	6077.48	40941.5	250.405	441.411	201230-74C	102.612	10.7404
201230-74D	41	15526.2	335.997	1.94758	1.8176	0.463074	0.354383	6936.96	45359.6	277.539	443.813	201230-74D	103.499	10.8332
201230-74E	45	15921	411.116	2.29762	2.29672	0.0873714	0.902067	13499.8	52197.3	344.954	596.015	201230-74E	92.368	9.66816
201230-74F	40	12635.3	354.47	2.22818	2.21289	0.116399	0.998717	11146	46747.9	305.512	456.793	201230-74F	89.82	9.40146
201230-75A	28	25652.9	528.24	1.26254	1.15973	0.851748	0.67655	17853.5	64450.7	427.594	476.507	201230-75A	46.737	4.89196
201230-75B	22	31523.6	633.182	0.878012	0.818482	1.0182	0.644333	17583.8	68641.4	438.321	448.778	201230-75B	47.062	4.92598
201230-75C	23	29471.1	487.787	0.733827	0.738913	1.50701	0.644333	16378.9	57148.5	381.521	361.442	201230-75C	44.233	4.62987
201230-75D	26	35855	628.415	1.09438	1.01939	1.10231	0.515467	23310.5	75510.3	509.318	526.381	201230-75D	45.9	4.80435
201230-75E	26	28198.9	475.365	0.913393	0.844951	1.82459	0.547683	16015.7	53866.5	359.91	398.182	201230-75E	53.979	5.64998
201230-75F	25	27200.5	486.457	0.888053	0.716217	1.1464	0.5799	16398.9	54305.6	364.73	391.801	201230-75F	53.508	5.60068
201230-75G	32	19011.5	447.686	2.54927	2.42786	0.389615	0.451033	11703	58618.6	371.511	461.534	201230-75G	70.948	7.42613
201230-76A	47	17557.3	350.079	2.15506	2.0103	0.745176	0.740983	9237.56	42895.2	272.893	530.084	201230-76A	99.346	10.3985
201230-76B	53	19378.1	390.887	2.02823	1.95768	0.433386	0.740983	11110.1	51540.7	330.458	667.432	201230-76B	99.218	10.3851
201230-76C	44	17243.1	300.694	2.06779	1.9393	0.659596	0.547683	7565.45	40051.2	250.92	426.244	201230-76C	105.58	11.0511
201230-76D	53	14076	318.095	2.42973	2.36105	0.114203	0.86985	10175.1	40780.6	267.64	543.141	201230-76D	104.452	10.933
201230-76E	19	32386.5	490.911	0.955649	0.809285	1.71808	0.5799	12294.2	48630.3	309.568	300.495	201230-76E	58.361	6.10865
201230-76F	40	10714.2	222.246	1.84294	1.67758	0.456544	0.612117	7397.94	29233.6	192.318	286.401	201230-76F	59.71	6.24985
201230-77A	41	21480.1	405.522	1.72772	1.62562	0.526163	0.644333	13563	50650.9	335.937	535.647	201230-77A	87.342	9.14209
201230-77B	49	25769.9	481.636	1.7911	1.7244	0.488825	0.9665	14510.5	57374.4	373.567	760.319	201230-77B	88.087	9.22007
201230-77C	48	22525.9	424.512	2.13998	2.00565	0.272676	0.805417	12749.4	52114.6	337.391	656.465	201230-77C	90.914	9.51597
201230-77D	44	28146.1	458.52	2.18296	2.25925	0.243381	0.7732	14814.5	52189	343.051	649.967	201230-77D	93.585	9.79554
201230-77E	36	15789.8	364.296	1.92034	1.90472	0.254354	0.86985	11655.7	46158.2	302.826	422.51	201230-77E	79.162	8.28589
201230-77F	39	23312.1	498.41	1.73928	1.68363	0.575696	0.837633	18110	59068.9	398.586	626.227	201230-77F	82.081	8.59142
201230-77G	46	14827.2	330.827	1.79633	1.65082	0.612924	0.7732	11573.6	42536.3	284.814	490.275	201230-77G	97.842	10.2411
201230-77H	52	17389.5	360.294	1.86947	1.77777	0.423813	0.805417	11187.9	43291.2	282.438	603.589	201230-77H	101.29	10.602
201230-78E	19	20036.4	427.465	1.01839	0.95304	1.18714	0.48325	16871.8	48746.5	333.692	261.658	201230-78E	47.471	4.96879
201230-78F	27	18074.9	472.182	1.1974	1.1315	0.745339	0.644333	19496.2	53915.2	376.656	410.727	201230-78F	48.002	5.02437
201230-79A	40	17430.2	322.034	1.90918	1.85124	0.377651	0.708767	9051.84	40383.7	258.319	414.994	201230-79A	102.823	10.7625
201230-79B	45	17972.4	328.562	2.21949	2.15285	0.370179	0.7732	9399.47	41013.7	262.593	476.332	201230-79B	99.167	10.3798
201230-79C	31	8513.72	307.462	1.83145	1.87963	0.196919	0.644333	9116.09	42666.9	275.309	307.067	201230-79C	80.218	8.39642
201230-79D	39	11679.4	324.563	1.7178	1.73832	0.265298	0.86985	9567.57	41713.1	269.087	407.798	201230-79D	75.192	7.87035
201230-80A	35	18399.5	409.176	1.43448	1.46249	0.407952	0.740983	12812.5	47699.4	313.334	461.38	201230-80A	54.22	5.67521
201230-80B	28	15474.6	323.833	1.21872	1.11277	0.600473	0.5799	10802.6	39430.5	260.035	292.119	201230-80B	48.418	5.06791
201230-80C	44	21559.1	390.91	1.92404	1.89413	0.36801	0.805417	10928.9	47086.6	300.506	554.128	201230-80C	93.213	9.7566
201230-80D	50	18452.2	377.586	2.29423	2.22553	0.0827729	0.740983	11439.9	45859	297.864	608.228	201230-80D	90.951	9.51984
201230-80E	26	23759.4	361.093	1.25562	1.21393	1.09236	0.547683	7249.03	43552.7	266.048	302.463	201230-80E	88.669	9.28098
201230-80F	39	14430.4	274.029	1.78707	1.67002	1.05058	0.3866	7143.92	37127.3	233.87	344.304	201230-80F	90.403	9.46248
210826-21A	37	12261.5	277.445	1.78108	1.74707	0.271249	0.740983	8931.67	35416.2	232.52	330.719	210826-21A	72.345	7.57211
210826-21B	37	14906.7	315.331	1.87051	1.86555	0.272647	0.86985	10125.6	39040	256.476	375.88	210826-21B	69.983	7.32489
210826-21C	42	20399.6	367.253	2.23598	2.14003	0.194615	1.06315	9707.39	41798.6	266.216	496.93	210826-21C	102.304	10.7078
210826-21D	43	15047.6	327.318	2.34717	2.31376	0.0517331	0.547683	8377.59	38637.7	245.391	453.438	210826-21D	107.683	11.2708
210826-21E	43	11592.2	313.115	2.28859	2.28435	0.153996	1.12758	10202.3	38884.1	256.469	433.763	210826-21E	78.731	8.24051
210826-21F	42	9916.31	240.191	2.20368	2.16371	0.0591235	1.1598	7545.75	30939.3	202.565	325.002	210826-21F	77.532	8.11502
210826-22A	40	15940.7	311.608	1.23373	1.20827	0.584584	0.837633	12177	36145.4	249.401	401.559	210826-22A	65.268	6.83138
210826-22B	36	20293.5	376.414	1.3683	1.3638	0.640915	0.86985	12581.4	43995.9	291.809	436.564	210826-22B	63.489	6.64518
210826-23A	34	12573.3	283.264	1.95205	1.99048	0.16585	0.805417	8914.72	35146.6	229.75	310.278	210826-23A	57.239	5.99102
210826-23B	39	11817.6	330.264	2.09502	2.0872	0.0477536	0.7732	10655.4	38855.5	256.189	414.96	210826-23B	53.862	5.63756
210826-24A	42	17166.4	342.028	2.28897	2.2167	0.0812948	0.934283	11042.1	42128.4	277.205	462.798	210826-24A	76.854	8.04405
210826-24B	47	16252.4	333.186	2.37202	2.38409	0.0759485	0.86985	11191.4	41186.9	273.757	504.504	210826-24B	77.985	8.16243
210826-26A	45	18766.7	278.277	2.32988	2.29672	0.194286	0.740983	8078.5	35356.6	226.646	403.432	210826-26A	117.387	12.2865
210826-26B	44	15914.6	225.494	2.44797	2.38417	0.215162	0.612117	6059.45	29638	188.033	319.645	210826-26B	116.462	12.1897
210826-27A	29	11088.3	218.502	1.82305	1.81915	0.442407	0.451033	5683.1	29742.3	187.82	204.143	210826-27A	62.345	6.52544
210826-27B	26	11975.8	252.152	1.82299	1.77161	0.501413	0.451033	6840.5	33065.9	209.946	211.211	210826-27B	62.926	6.58625
210826-28A	30	8545.62	286.062	1.72136	1.6995	0.246594	0.708767	8557.4	35072.4	227.519	276.479	210826-28A	54.61	5.71585
210826-28B	36	10556.6	241.28	2.01959	1.99511	0.136518	0.7732	7455.83	31116.4	202.714	279.836	210826-28B	57.855	6.05549
210826-29A	29	9648.44	404.919	1.21134	1.24881	0.269369	0.902067	17528.4	44894.1	318.657	378.31	210826-29A	25.944	2.71547
210826-30A	37	20976.9	417.079	1.79393	1.74434	0.173376	0.902067	12345.6	52709.3	341.22	497.165	210826-30A	70.73	7.40307
210826-30B	37	17119.4	306.388	1.87382	1.88833	0.364928	0.805417	9231.74	39912.1	258.021	365.22	210826-30B	74.875	7.83692
210826-48A	32	22913.6	385.954	0.997723	0.932575	1.10579	0.837633	13423.7	43315.6	290.083	397.893	210826-48A	64.07	6.70599
210826-48B	34	15913.2	343.725	1.09067	1.02053	0.78969	0.708767	9854.79	43112.6	278.817	376.505	210826-48B	66.774	6.98901
210826-49A	27	22685.7	414.858	1.05647	1.05657	0.716599	0.7732	11432.7	44616.8	287.772	360.864	210826-49A	59.854	6.26472
210826-49B	24	23523.8	398.738	1.02646	0.961026	1.02173	0.67655	13675.6	47156.2	315.707	308.304	210826-49B	56.291	5.89179
210826-50A	22	21102.7	337.553	0.646762	0.588571	1.6437	0.5799	11233.6	37127.9	247.191	239.246	210826-50A	54.133	5.66592
210826-50B	25	18916.1	267.329	0.752473	0.647428	1.95965	0.515467	9761.9	30996.4	210.726	215.311	210826-50B	54.031	5.65524
210826-51A	25	18601.6	274.689	0.95664	0.809285	1.48991	0.612117	9697.65	32754.9	219.54	221.239	210826-51A	57.156	5.98233
210826-51B	27	17027.2	279.399	0.796428	0.756832	1.41787	0.48325	10308.7	32937.3	221.871	243.035	210826-51B	56.333	5.89619
210826-52A	35	9422.11	354.285	1.6035	1.58292	0.220235	0.67655	11391.4	42108.6	278.08	399.486	210826-52A	48.905	5.11872
210826-52B	38	9690.33	337.365	1.62538	1.55468	0.287255	0.86985	12799.3	41014.2	280.048	413.014	210826-52B	48.357	5.06137
210826-53A	27	20795	459.761	1.18608	1.09403	0.618881	0.67655	15746.6	51384	342.307	399.923	210826-53A	44.837	4.69294
210826-53B	31	24345.9	462.84	1.05124	0.988072	1.05636	0.740983	19938	53877.6	379.334	462.246	210826-53B	44.628	4.67106
210826-54A	25	15909.7	311.022	0.961646	0.960352	1.38231	0.740983	13663.2	34611.6	245.953	250.502	210826-54A	37.551	3.93034
210826-54B	23	12684.5	290.444	1.04779	0.923641	0.852471	0.740983	8677.99	33750.9	219.86	215.214	210826-54B	39.658	4.15087
210826-55A	35	8848.81	300.371	2.69916	2.62488	0.0650358	0.644333	7069.89	43595.8	270.97	338.693	210826-55A	72.419	7.57986
210826-55B	46	16440.7	304.066	1.98677	1.94698	0.64104	0.805417	11994.8	36516	252.118	450.616	210826-55B	73.026	7.64339
210826-56A	38	15242.8	419.953	1.94724	1.82533	0.198764	0.7732	15424.5	50410.8	341.202	514.121	210826-56A	54.014	5.65347
210826-56B	42	14856.4	350.439	1.86554	1.84257	0.182297	1.03093	13730.5	41662.1	287.763	474.179	210826-56B	53.753	5.62615
210826-57A	34	26787.3	443.611	1.0795	0.97987	1.33897	0.708767	15068.2	51257.4	339.416	485.917	210826-57A	72.641	7.60309
210826-57B	40	16372.8	333.163	1.30221	1.32773	0.739783	0.515467	9748.95	41882.8	269.71	429.336	210826-57B	72.757	7.61523
210826-58A	43	13339.6	273.156	1.87541	1.81344	0.371756	0.67655	7944.48	36019	231.104	378.407	210826-58A	82.571	8.64243
210826-58B	36	12001.2	228.972	1.71678	1.65978	0.557567	0.354383	5400.22	30733.6	191.005	265.562	210826-58B	82.772	8.66347
210826-59A	46	14246.4	241.503	1.2961	1.25681	0.87159	0.644333	7426.23	31349.7	203.33	357.9	210826-59A	93.643	9.8013
210826-59B	51	13491.2	251.979	1.63525	1.57229	0.567035	0.998717	7999.18	32447.2	212.84	414.014	210826-59B	92.112	9.64106
210826-60A	36	8091.91	340.978	1.3643	1.36286	0.189688	0.998717	14458.8	39378.9	278.391	395.467	210826-60A	35.036	3.6671
210826-60B	28	16814.7	392.409	0.919376	0.905629	1.06053	0.5799	18742	39409.2	288.307	353.98	210826-60B	34.347	3.59499
210826-61A	46	13806.8	237.019	1.67446	1.67502	0.535325	0.740983	7523.57	30844.4	201.398	351.254	210826-61A	84.819	8.87772
210826-61B	44	13531.1	241.211	1.24144	1.14266	1.25923	0.48325	7956.43	30812	202.59	341.924	210826-61B	81.935	8.57586
210826-62A	33	18029.6	278.659	0.865827	0.784761	1.42031	0.708767	7397.34	32297.6	204.852	296.257	210826-62A	85.686	8.96847
210826-62B	43	11772.6	239.016	1.64605	1.62092	0.778402	0.805417	6246.71	30191.1	190.494	331.113	210826-62B	87.593	9.16807
210826-64A	29	17394.6	326.309	0.95434	0.96277	1.18808	0.644333	13323.8	36035.4	250.993	304.865	210826-64A	46.889	4.90772
210826-64B	29	18069.3	347.271	1.06214	0.9837	1.11315	0.67655	14343.5	37247	261.36	324.45	210826-64B	46.767	4.89495
210826-65A	35	15679.1	347.551	1.29257	1.23127	0.604538	0.902067	12916.8	37837.1	257.637	391.893	210826-65A	50.744	5.31121
210826-65B	38	11900	275.141	1.04455	0.963688	0.830452	0.86985	10685.8	33298.3	229.057	336.837	210826-65B	52.769	5.52316
CaCl2
Name	Number of IFT trajectories	IFT intensity	Average IFT intensity	Average velosity	Median velosity	Pausing duration (s)	Frequency	Unit intensity	Unit background	background	Trajectory intensity	Name	Length	Length (um)
221109-07A	16	41561.1	627.191	0.730648	0.619609	2.30535	0.331371	22578.6	70049.8	485.75	277.111	221109-07A	25.983	2.71964
221109-07B	15	35860.5	617.1	0.606174	0.512547	2.18658	0.220914	20412.5	71348.1	486.049	255.612	221109-07B	25.934	2.71451
221109-08A	16	31023.6	633.639	0.887677	0.855651	1.77832	0.358986	19845.7	63362.1	431.81	279.96	221109-08A	43.226	4.52447
221109-08B	18	48601.1	643.986	0.519689	0.438363	3.04075	0.276143	21994.9	68856.6	470.218	320.098	221109-08B	40.975	4.28885
221109-09A	13	38955	603.792	0.555374	0.529148	2.71798	0.248529	18444.5	64850	440.755	216.753	221109-09A	24.089	2.5214
221109-09B	7	53639.1	791.271	0.504816	0.491352	2.77141	0.165686	15122.5	79746.7	488.917	152.953	221109-09B	23.147	2.4228
221109-17A	26	22206.3	435.047	1.15248	1.0583	0.650643	0.414214	12191.1	54881.9	359.859	312.351	221109-17A	44.833	4.69267
221109-17B	26	30831.9	505.095	1.05222	1.01939	0.961041	0.524671	16382	60680.7	410.67	362.644	221109-17B	44.504	4.65823
221109-18A	40	25171.9	450.84	1.35762	1.24259	0.746249	0.800814	13911.2	52810.2	351.048	497.985	221109-18A	71.4	7.47344
221109-18B	41	18498.4	333.216	1.38403	1.23613	0.62332	0.800814	9538.51	40183.4	264.432	377.262	221109-18B	72.991	7.63997
221109-19A	36	25446.8	645.834	1.71158	1.68929	0.353509	0.828429	19346.5	83588.2	552.341	642.033	221109-19A	35.975	3.7655
221109-19B	36	22263.7	686.357	1.81266	1.81949	0.278784	0.717971	20375.4	89059.9	586.391	682.317	221109-19B	38.67	4.04759
221109-20A	29	21997	778.023	1.14957	1.13021	0.387106	0.745586	27274.5	100660	686.751	623.052	221109-20A	23.482	2.45786
221109-20B	26	29489.9	737.691	1.0108	1.02717	0.762068	0.607514	29830.6	90336.9	640.543	529.641	221109-20B	25.119	2.62921
221109-21A	27	23164	733.54	0.98222	0.989126	0.66295	0.717971	28048	86319.3	608.062	546.917	221109-21A	33.935	3.55198
221109-21B	34	28884	817.389	1.10752	1.07855	0.639055	0.856043	33565.6	93203.3	671.489	767.435	221109-21B	31.856	3.33437
221109-22A	43	12703.8	476.711	2.51936	2.50706	0.0300774	0.938886	13197.5	61268.2	398.896	566.053	221109-22A	53.633	5.61377
221109-22B	48	14939.2	575.944	2.30058	2.26347	0.0183221	1.18741	19343.2	72633.7	495.187	763.406	221109-22B	52.886	5.53558
221109-23A	38	15810.4	849.029	1.83606	1.85683	0.0762382	1.02173	24315.2	118088	773.983	890.922	221109-23A	52.233	5.46723
221109-23B	39	33215.4	674.087	1.45384	1.437	0.307745	0.745586	21030.3	84205.1	563.131	725.962	221109-23B	54.472	5.70158
221109-24A	36	13623.9	397.385	1.30691	1.35583	0.310398	0.745586	13223.7	50302.3	340.795	395.047	221109-24A	34.694	3.63142
221109-24B	47	16452	547.467	1.33524	1.33087	0.270773	1.04934	23467.6	64766.4	472.562	710.542	221109-24B	31.648	3.3126
221109-25A	41	14685.2	406.817	1.46155	1.40638	0.411341	0.607514	11994.3	50564.9	332.589	460.592	221109-25A	60.923	6.37681
221109-25B	36	16233.9	332.963	1.2497	1.26451	0.6481	0.635129	10448.8	43094.2	286.447	331.003	221109-25B	58.59	6.13262
221109-26A	56	18585.5	442.414	1.9664	1.94433	0.387074	1.04934	15366.2	50101.5	345.342	684.149	221109-26A	78.097	8.17441
221109-26B	47	23602.6	507.705	2.15355	2.12868	0.26637	0.994114	14006.1	57030.3	372.137	658.935	221109-26B	76.859	8.04483
221109-28A	41	21806.9	731.014	1.44947	1.43763	0.235953	0.856043	25793.7	87864.2	608.744	827.644	221109-28A	37.282	3.90231
221109-28B	34	42037.9	1000.28	1.34607	1.33889	0.346916	0.7732	32721.6	121696	822.611	939.146	221109-28B	37.945	3.9717
221109-29A	41	16563.8	475.012	1.58053	1.5721	0.431529	0.717971	15731.1	55608	377.097	537.802	221109-29A	59.461	6.22378
221109-29B	37	19857.9	571.264	1.68215	1.65138	0.297815	0.607514	15665.5	64892.2	425.287	583.677	221109-29B	60.618	6.34489
221109-30A	33	18752.6	458.941	1.69712	1.62777	0.697612	0.552286	10478.7	57954.7	365.591	418.22	221109-30A	65.187	6.82312
221109-30B	43	14292.2	521.048	2.28838	2.30435	0.13234	0.690357	13485.2	69776.7	448.716	618.699	221109-30B	63.111	6.60583
221109-36A	47	19317.6	374.01	1.93788	1.89443	0.260867	0.745586	10565	46775	305.422	485.417	221109-36A	91.387	9.56548
221109-36B	46	21381.6	390.4	1.85553	1.76994	0.158573	0.911271	10856.9	45098.6	295.619	495.909	221109-36B	90.674	9.49085
221109-37A	46	23337.3	353.273	1.45694	1.42688	0.535325	0.7732	8142.59	43564.4	274.737	448.748	221109-37A	112.358	11.7605
221109-37B	49	23749.6	373.658	1.97437	1.85048	0.2101	0.717971	9871.15	46599	300.57	505.596	221109-37B	114.452	11.9797
221109-38A	51	25954.4	771.402	2.06479	2.04305	0.1623	0.911271	24850.7	88390.7	597.343	1086.39	221109-38A	66.509	6.9615
221109-38B	47	19819.5	573.526	1.90649	1.82484	0.21904	0.883657	17903.4	71749.1	479.352	744.363	221109-38B	63.651	6.66235
221109-39A	54	24599.3	518.355	1.98579	1.87959	0.206932	0.938886	11807.1	59124.4	373.197	772.956	221109-39A	92.458	9.67758
221109-39B	58	20923.6	396.05	2.2398	2.12728	0.088303	0.911271	10746.8	50555.7	328.362	634.324	221109-39B	95.223	9.96699
221109-40A	42	20193.2	472.594	2.00615	1.9626	0.322716	0.662743	12551.3	56843.6	368.461	548.114	221109-40A	83.881	8.77982
221109-40B	47	19443.6	518.178	1.90233	1.89371	0.215738	0.856043	13088.2	65970.9	421.804	672.529	221109-40B	86.883	9.09404
221109-41A	70	28697.3	583.745	2.54151	2.47169	0.0583845	1.02173	18692.5	73573.3	494.374	1128.38	221109-41A	98.695	10.3304
221109-41B	63	23370.4	458.984	1.79336	1.77647	0.569064	0.469443	13930.8	56404.6	374.479	798.494	221109-41B	97.993	10.2569
221109-42A	64	22681.7	434.494	2.14707	2.13307	0.438114	0.828429	13441.3	51473.3	342.541	767.888	221109-42A	95.262	9.97107
221109-42B	58	20163.8	381.154	2.24053	2.14182	0.264909	0.800814	11145.4	47357.1	312.566	610.468	221109-42B	94.166	9.85636
221109-43A	38	18296.6	518.662	1.65009	1.58751	0.412503	0.607514	12187.7	64022.6	403.653	544.254	221109-43A	59.224	6.19898
221109-43B	27	29609.2	617.669	1.61096	1.49118	0.450269	0.497057	11232.4	77482.2	472.173	460.525	221109-43B	57.256	5.99299
221109-44A	47	19863.6	461.524	1.74788	1.69247	0.358829	0.662743	10661.9	53924.8	340.961	598.999	221109-44A	79.01	8.26998
221109-44B	42	16553.1	380.17	1.90957	1.74783	0.476683	0.414214	8319.34	48058.1	300.39	440.922	221109-44B	78.203	8.18551
221109-45A	37	33942.5	798.373	1.54059	1.47913	0.304806	0.745586	19402.6	92521.7	592.332	815.72	221109-45A	57.9	6.06039
221109-45B	39	40168.9	907.896	1.65932	1.6082	0.217544	0.690357	22806.8	103385	663.283	977.765	221109-45B	59.207	6.1972
221109-46A	56	26975.4	625.663	1.92748	1.95577	0.180142	0.883657	20258.6	73733.3	498.408	967.525	221109-46A	70.533	7.38269
221109-46B	45	22922.1	628.054	2.25436	2.21654	0.0919699	1.04934	18903.6	78451	519.898	780.447	221109-46B	70.66	7.39598
221109-47A	45	34829.8	771.669	2.00921	2.04794	0.113813	0.856043	22338.1	92783.3	609.797	958.909	221109-47A	57.622	6.03129
221109-47B	52	33187.8	855.337	2.34805	2.38019	0.0547177	1.07696	27266	99792.4	674.425	1228.22	221109-47B	60.439	6.32615
221109-48A	68	36006.8	686.948	2.10774	2.05966	0.212258	1.10457	21701.1	79099.2	533.01	1289.93	221109-48A	90.292	9.45086
221109-48B	48	26604.2	537.576	2.05188	2.03621	0.497931	0.7732	15359.5	63582.1	417.722	712.549	221109-48B	88.031	9.2142
221109-49A	38	39717	782.452	1.5648	1.59062	0.499632	0.552286	17912.8	87762.7	551.021	821.061	221109-49A	69.675	7.29288
221109-49B	38	32707.7	660.658	2.22236	2.23485	0.190595	0.5799	14289.9	72185.3	450.453	693.257	221109-49B	68.621	7.18256
221109-51B	48	21664.1	491.04	2.38064	2.4124	0.153044	0.883657	12960.4	62783.4	406.375	650.867	221109-51B	100.733	10.5437
221109-52A	46	20374.2	603.728	1.9319	1.93268	0.256416	0.856043	16333	74174.9	481.952	766.89	221109-52A	67.567	7.07224
221109-52B	45	22409.5	582.551	2.01608	2.00068	0.196586	0.828429	14937.3	69372.3	446.214	723.903	221109-52B	66.516	6.96223
221109-53A	53	24826.9	496.461	2.32285	2.30475	0.0595418	0.635129	12931.1	57058.3	371.849	726.6	221109-53A	89.091	9.32515
221109-53B	64	32062.4	686.351	2.04908	2.05746	0.223099	1.02173	19555.3	85785.8	564.099	1213	221109-53B	89.915	9.4114
221109-54A	57	22197.2	574.717	2.36416	2.29534	0.0426571	1.02173	17995.9	69890.1	467.762	904.613	221109-54A	82.498	8.63507
221109-54B	57	30196.7	531.132	2.38431	2.41336	0.0871294	1.13219	15908.5	67485.9	449.051	836.009	221109-54B	82.324	8.61685
221109-55A	57	28984.7	543.859	2.40203	2.41129	0.078961	0.994114	16444.9	66150.9	440.335	856.042	221109-55A	84.264	8.81991
221109-55B	51	35022.8	750.042	2.37207	2.29694	0.144041	0.800814	17372.4	93846.5	594.637	1056.31	221109-55B	85.925	8.99377
221109-56A	49	22147.5	491.806	1.818	1.73625	0.157311	0.690357	13258.9	56916	371.297	665.463	221109-56A	67.477	7.06282
221109-56B	44	24393.5	475.106	2.05009	2.02398	0.121102	0.938886	12821.1	51306.3	334.414	577.267	221109-56B	67.567	7.07224
221109-57A	51	34347.9	712.055	2.66749	2.70357	0.0750637	0.883657	20683.6	87038.9	573.765	1002.81	221109-57A	70.714	7.40163
221109-57B	50	21366.1	561.191	2.20398	2.19991	0.24418	0.938886	14940.6	67378.9	438.539	774.844	221109-57B	69.276	7.25112
221109-58A	40	25457.4	610.477	1.39884	1.42384	0.593637	0.828429	17183.1	65215	429.287	674.315	221109-58A	66.958	7.00849
221109-58B	51	19032.5	524.198	1.77177	1.7799	0.269823	0.828429	15103.2	62744.5	412.09	738.243	221109-58B	64.242	6.72421
221109-59A	47	37096.4	831.507	1.85014	1.8625	0.398455	0.607514	21409.2	94548.6	611.794	1079.19	221109-59A	80.613	8.43776
221109-59B	58	30846.1	703.086	1.80877	1.75549	0.323778	1.02173	21377.3	81434.7	544.728	1126.08	221109-59B	77.594	8.12176
221109-60A	40	33241.7	479.681	1.48341	1.42637	0.336265	0.690357	12285	51773.5	335.58	529.841	221109-60A	82.987	8.68625
221109-60B	38	36897.2	542.91	1.46105	1.35768	0.393444	0.800814	13339.4	57799.7	370.727	569.698	221109-60B	82.689	8.65506
221109-61A	56	22246.9	609.141	2.13541	2.15749	0.107161	0.994114	19748	73524.9	497.083	941.975	221109-61A	60.752	6.35891
221109-61B	33	37185.9	802.699	1.45747	1.45566	0.597282	0.662743	22574.2	91461.9	595.868	731.476	221109-61B	58.143	6.08583
221109-62A	65	35045.1	661.075	2.43713	2.43901	0.0740181	0.9665	18484.2	79983.5	522.968	1186.58	221109-62A	97.382	10.193
221109-62B	55	30360.8	562.156	1.76583	1.69459	0.528618	0.717971	15064.7	69277.8	449.372	853.794	221109-62B	96.081	10.0568
221109-63A	54	31996	628.431	2.65775	2.68905	0.149451	0.883657	18175.2	76936.2	505.13	937.098	221109-63A	88.532	9.26664
221109-64A	48	25419.3	612.987	2.0411	1.94599	0.321176	0.883657	19807.7	77112.3	517.566	812.506	221109-64A	48.63	5.0901
221109-64B	40	17120.6	485.097	1.78923	1.78043	0.463011	0.717971	15341.2	60133.3	402.969	535.824	221109-64B	46.167	4.8323
221109-65A	44	20094.2	415.839	2.43504	2.40333	0.109345	0.856043	10289.4	53521.7	341.197	505.256	221109-65A	98.573	10.3176
221109-65B	41	26312.6	438.056	2.2784	2.18412	0.191791	0.994114	8662.06	49812	308.943	495.96	221109-65B	96.966	10.1494
221109-66A	59	15662.8	321.729	2.10355	2.0195	0.287601	0.690357	9743.53	40505.9	269.237	524.174	221109-66A	86.273	9.03019
221109-66B	54	17501.9	342.421	1.98195	1.92049	0.279742	0.7732	10109.3	42745.4	281.757	510.609	221109-66B	84.697	8.86523
221109-67A	45	29264.3	775.645	2.597	2.57323	0.0413864	0.938886	19596.9	103510	661.991	963.849	221109-67A	61.815	6.47018
221109-67B	50	31184.7	605.158	2.34279	2.28758	0.120021	1.02173	18051.5	75763.1	501.586	835.55	221109-67B	75.815	7.93556
221109-68A	50	15403.4	360.746	2.01543	2.00838	0.303156	0.7732	10189.7	48078.5	313.312	498.087	221109-68A	64.413	6.74211
221109-68B	46	15613.6	385.17	1.84517	1.83482	0.250793	0.745586	10859.6	51321.2	335.474	489.265	221109-68B	61.942	6.48347
221109-69A	31	24393.7	760.41	1.55539	1.53373	0.353787	0.607514	18795.4	92768.4	594.925	650.944	221109-69A	42.268	4.42419
221109-69B	23	18470.9	590.72	1.80104	1.81503	0.24517	0.358986	9488.14	79221.5	476.188	375.183	221109-69B	42.372	4.43508
221109-70A	54	28657.3	709.554	2.41967	2.40288	0.113046	0.690357	18956.3	91835.5	594.182	1058.07	221109-70A	71.594	7.49374
221109-71B	59	38004.5	697.475	2.47505	2.54045	0.0754075	0.856043	19504.8	85088.4	557.727	1136.36	221109-71B	96.678	10.1193
221109-72A	44	20757.3	690.46	1.56977	1.59635	0.125805	1.02173	24524.1	84066.6	580.832	838.928	221109-72A	36.522	3.82276
221109-72B	43	13537.1	524.008	1.56022	1.58563	0.18287	0.717971	17744	62186.5	425.187	622.215	221109-72B	37.216	3.8954
221109-73A	52	28974.1	783.352	2.25855	2.29849	0.0905329	0.911271	21044.4	96734	626.736	1124.85	221109-73A	66.469	6.95731
221109-73B	56	37072.3	789.869	2.46891	2.47241	0.0702091	1.04934	24938.5	95064.3	637.004	1221.45	221109-73B	67.425	7.05737
221109-74A	34	34593.5	875.828	1.55141	1.53377	0.585801	0.358986	18311	110226	683.172	822.303	221109-74A	50.903	5.32802
221109-74B	35	18753.3	519.698	1.64777	1.60701	0.372478	0.303757	11204.5	68968.3	432.569	502.288	221109-74B	48.731	5.10067
221109-75A	43	23358.4	494.573	2.06933	2.02047	0.251447	0.524671	11140.8	60705	380.906	587.263	221109-75A	84.997	8.89664
221109-75B	43	23172.7	493.864	1.91595	1.82812	0.423489	0.717971	12981.5	61068.2	394.514	586.421	221109-75B	80.518	8.42782
221109-76A	52	25223.9	679.118	1.83326	1.84035	0.189025	0.9665	23850	77840.2	536.307	975.175	221109-76A	55.165	5.77412
221109-76B	50	26981.6	681.659	1.84637	1.84517	0.231764	0.911271	23832	78786.8	541.973	941.177	221109-76B	49.868	5.21968
221109-77A	57	21774.5	563.448	2.19529	2.24713	0.0662546	1.13219	18353.5	65965	447.619	886.876	221109-77A	76.061	7.9613
221109-77B	66	23900	519.69	2.03832	2.07277	0.163821	1.1598	17751.3	64460.7	439.858	947.157	221109-77B	77.128	8.07299
221109-78A	54	25914.8	485.966	2.65429	2.64253	0.0718515	1.04934	15179.9	57409.9	385.488	724.659	221109-78A	103.336	10.8162
221109-78B	68	25952.8	449.816	2.75858	2.76307	0.0639055	1.24264	15704.1	53742.6	369.919	844.651	221109-78B	105.544	11.0473
221109-79A	70	26063	554.607	2.62132	2.59181	0.129333	1.10457	19354.1	63096.7	431.907	1072.05	221109-79A	96.84	10.1362
221109-79B	57	25854.1	571.19	2.5744	2.52842	0.0127064	0.7732	16048.8	70296.7	462.193	899.061	221109-79B	98.494	10.3094
221109-80A	59	20750.6	401.334	2.592	2.54702	0.0140293	0.883657	11246.6	47476.2	311.176	653.871	221109-80A	119.895	12.5494
221109-80B	59	24745.4	391.245	2.30826	2.24497	0.113988	0.635129	9496.43	48820.2	311.116	637.433	221109-80B	122.209	12.7916

## Sheet: Differences
Control				ppr2				EGTA				CaCl2
Name	Length (um)	Unit intensity	Difference	Name	Length (um)	Unit intensity	Difference	Name	Length (um)	Unit intensity	Difference	Name	Length (um)	Unit intensity	Difference
201230-21A	3.52424	17533.5	-2352.65	201230-11A	5.69939	11876.3	-4296.88	201230-41A	6.43543	14639.8	-276.968	221109-07A	2.71964	22578.6	1319.06
201230-21B	3.61897	17881.7	-1842.7	201230-11B	5.93887	10492.4	-5272	201230-41B	6.61054	10305.1	-4312.73	221109-07B	2.71451	20412.5	-855.793
201230-22A	4.96848	20044.8	2624.02	201230-12A	3.27575	18112.7	-2197.61	201230-41C	7.51552	12249	-823.991	221109-08A	4.52447	19845.7	1666.97
201230-22B	4.56361	20833.1	2721.23	201230-12B	3.12764	23806.7	3243.63	201230-41D	7.41911	12490.3	-747.285	221109-08B	4.28885	21994.9	3413.96
201230-23A	5.95258	13568.3	-2172.63	201230-13A	4.14305	9862.67	-8967.15	201230-42A	5.25998	18313.7	1390.52	221109-09A	2.5214	18444.5	-3153.43
201230-24A	3.43192	18417.2	-1626.49	201230-13B	3.85196	15057.4	-4269.29	201230-42B	4.81723	23445.9	5766.87	221109-09B	2.4228	15122.5	-6643.79
201230-24B	3.34295	20280.7	85.102	201230-14A	3.02999	24563.1	3833.3	201230-43A	7.59192	13338.2	395.647	221109-17A	4.69267	12191.1	-5700.51
201230-25A	2.75952	27087.6	5896.08	201230-14B	2.85854	18742	-2280.49	201230-43B	7.31015	16150.6	2726.99	221109-17B	4.65823	16382	-1568.44
201230-25B	2.95902	20261.6	-589.382	201230-15A	4.12588	22217.3	3358.17	201230-44A	3.33793	18708.6	-1495.55	221109-18A	7.47344	13911.2	766.348
201230-26A	8.06775	15114.6	2984.31	201230-15B	4.14357	16152.1	-2676.8	201230-44C	3.81554	14184.3	-5204.53	221109-18B	7.63997	9538.51	-3322.07
201230-26B	7.61223	9914.6	-2993.32	201230-16A	3.17014	23131.6	2641.06	201230-44D	3.91707	18024.1	-1191.45	221109-19A	3.7655	19346.5	-127.743
201230-27A	5.81327	14401.4	-1577.31	201230-16B	3.56276	19812.9	-7.43466	201230-45A	6.20609	13030.7	-2277.54	221109-19B	4.04759	20375.4	1382.62
201230-27B	5.51234	12999.4	-3493.08	201230-17A	5.28583	20582.9	3703.79	201230-45B	5.8991	13704.7	-2127.56	221109-20A	2.45786	27274.5	5568.06
201230-27C	3.75242	21706.9	2210.3	201230-17B	5.39459	15915.1	-778.301	201230-45C	7.23657	12710.9	-838.249	221109-20B	2.62921	29830.6	8416.69
201230-28A	6.10865	15413.1	-61.4675	201230-18A	5.5584	8486.12	-7927.7	201230-45D	7.5645	13661.4	671.96	221109-21A	3.55198	28048	8209.21
201230-28B	6.03192	13017.8	-2587.68	201230-18B	5.65396	7551.54	-8699.15	201230-45E	3.40282	20233.5	140.148	221109-21B	3.33437	33565.6	13355.3
201230-29A	5.7243	19119.8	2989.21	201230-19A	5.46838	14919.4	-1648.12	201230-45F	3.25555	16820.5	-3524.26	221109-22A	5.61377	13197.5	-3121.76
201230-29B	5.94515	15546.4	-207.259	201230-19B	4.49076	17349.6	-886.659	201230-46A	8.55478	10779.6	-519.351	221109-22B	5.53558	19343.2	2890.39
201230-52A	6.45563	14953.9	71.6444	201230-20A	8.04452	15098	2928.04	201230-46B	8.99503	8295.44	-2252.06	221109-23A	5.46723	24315.2	7745.73
201230-52B	6.0808	12316.2	-3205.82	201230-20B	7.59611	11713.5	-1221.97	201230-46E	3.74509	21326.1	1817.01	221109-23B	5.70158	21030.3	4860.93
201230-53A	5.01767	14976	-2360.81	201230-32A	3.81145	16668.3	-2727.59	201230-46F	4.30738	12934.1	-5615.24	221109-24A	3.63142	13223.7	-6479.49
201230-53B	5.10444	15228.5	-1960.19	201230-32B	3.9312	14526.6	-4664.87	201230-46G	6.17836	12863.3	-2492.26	221109-24B	3.3126	23467.6	3220.2
201230-54A	4.62746	23381.1	5378.17	201230-33A	6.30909	12042.2	-3090.16	201230-46H	5.99728	11225.3	-4439.37	221109-25A	6.37681	11994.3	-3022.51
201230-54C	6.24555	10943.2	-4297.65	201230-33B	6.49341	15361	543.262	201230-47A	5.02479	12282.3	-5042.41	221109-25B	6.13262	10448.8	-4984.84
201230-55A	9.90042	10406	1404.03	201230-34A	7.62908	9223.68	-3655.47	201230-47B	5.39856	13108.5	-3578.17	221109-26A	8.17441	15366.2	3417.91
201230-56A	9.02978	12096.9	1608.74	201230-34B	7.76107	10550.5	-2103.36	201230-47C	8.89873	6854.62	-3857.25	221109-26B	8.04483	14006.1	1836.63
201230-57A	8.74937	10279.6	-687.256	201230-35A	7.66854	11421.5	-1390.31	201230-47D	8.91234	9828.08	-860.565	221109-28A	3.90231	25793.7	6552.93
201230-57B	8.90972	12757.7	2064.63	201230-35B	7.95387	12567.6	242.819	201230-47E	5.23821	15475.8	-1484.54	221109-28B	3.9717	32721.6	13599.3
201230-58A	11.2161	11882.8	5126.72	201230-36A	5.63784	11242.4	-5035.77	201230-47F	4.91248	8733.83	-8782.57	221109-29A	6.22378	15731.1	453.079
201230-59A	10.5841	10412.7	2577.77	201230-36B	5.97352	10981.2	-4724.05	201230-48A	5.23863	19961.4	3001.71	221109-29B	6.34489	15665.5	594.263
201230-60A	9.74352	10657.2	1387.43	201230-37A	5.48649	12609.9	-3926.7	201230-48B	5.29442	14890.4	-1974.08	221109-30A	6.82312	10478.7	-3776.25
201230-60B	9.87645	12625.5	3582.62	201230-37B	5.65522	10747.1	-5501.4	201230-48C	4.82487	12472.4	-5193.59	221109-30B	6.60583	13485.2	-1140.66
201230-81A	9.07991	13686.8	3284.22	201230-38A	5.14882	14843.4	-2269.58	201230-48D	4.68744	14468.1	-3432.48	221109-36A	9.56548	10565	991.248
201230-81B	8.95598	14113.5	3499.33	201230-38B	5.11083	17927.9	750.107	201230-48E	4.47067	18416.6	146.023	221109-36B	9.49085	10856.9	1155.81
201230-85A	7.84104	11323.5	-1193.83	201230-39A	4.08694	13232.2	-5693.39	201230-49A	5.86801	9211.75	-6673.56	221109-37A	11.7605	8142.59	2315.78
201230-85B	8.46184	13085.8	1628.16	201230-39B	4.22511	15120.7	-3569.01	201230-49B	5.99476	11203.6	-4465.3	221109-37B	11.9797	9871.15	4418.48
201230-86A	10.7939	9184.05	1707.21	201230-39C	6.51623	14098.8	-679.976	201230-49C	4.94786	11262.8	-6193.19	221109-38A	6.9615	24850.7	10832
201230-87A	7.70664	11862.7	-884.014	201230-39D	6.2578	11653.9	-3566.07	201230-49D	4.96481	10911.5	-6515.59	221109-38B	6.66235	17903.4	3374.06
201230-87B	7.5578	8601.74	-4399.09	201230-39E	4.66933	10638.7	-7292.74	201230-49E	7.60061	12046.4	-881.326	221109-39A	9.67758	11807.1	2424.71
201230-90A	7.91211	9593.01	-2803.02	201230-39F	4.20376	12262.7	-6463.51	201230-49F	7.47323	9802.88	-3342.32	221109-39B	9.96699	10746.8	1858.43
201230-90B	7.59946	10276.8	-2652.97	201230-61A	8.85613	9122.4	-1662.19	201230-49G	4.41959	9714.44	-8643.32	221109-40A	8.77982	12551.3	1636.42
201230-91A	9.21944	17390.7	7226.25	201230-61B	8.89925	10399.6	-311.378	201230-49H	4.78813	7929.39	-9799.27	221109-40B	9.09404	13088.2	2709.71
201230-91B	9.39434	15806.5	5940.63	201230-62A	7.68445	16127.1	3342.47	201230-49I	7.38154	6901	-6400.72	221109-41A	10.3304	18692.5	10424.5
201230-92A	11.1124	12816	5882.89	201230-62B	7.24997	12142.1	-1384.17	201230-49J	7.72109	7414.81	-5307.3	221109-41B	10.2569	13930.8	5537.33
201230-94A	11.7909	14516.8	8741.85	201230-62C	5.41249	10586.3	-6076.58	201230-50A	7.56921	16176.3	3194.96	221109-42A	9.97107	13441.3	4559.97
201230-94B	11.854	8115.34	2448.09	201230-62D	5.65417	10027	-6223.34	201230-50B	7.97763	10625	-1659.18	221109-42B	9.85636	11145.4	2068.2
210701-02A	2.27692	23927.3	1912.02	201230-63A	9.79136	9497.79	309.638	201230-50C	5.37187	10761.9	-5970.27	221109-43A	6.19898	12187.7	-3132.64
210701-02B	2.45108	28054.3	6336.34	201230-63B	10.1063	9204.58	554.044	201230-50D	5.72116	16843.9	707.907	221109-43B	5.99299	11232.4	-4439.53
210701-04C	6.31423	9716.19	-5407.43	201230-63C	9.29156	8257.67	-1783.64	201230-71C	9.65455	10668.8	1247.12	221109-44A	8.26998	10661.9	-1123.21
210701-04D	6.75937	8580.09	-5783.66	201230-63D	9.60871	7926.89	-1573.05	201230-71D	10.0014	9994.63	1165.07	221109-44B	8.18551	8319.34	-3610
210701-05A	5.36647	19981.3	3239.91	201230-64A	9.32442	11843.2	1857.96	201230-71E	10.0513	8442.03	-302.484	221109-45A	6.06039	19402.6	3845.66
210701-05B	5.15672	15155.9	-1943.54	201230-64B	9.14659	11817.5	1528.71	201230-71F	9.6848	8859.99	-510.052	221109-45B	6.1972	22806.8	7483.44
210701-06A	6.65743	13253.8	-1283.96	201230-65A	8.15746	11191.2	-785.981	201230-71G	6.7801	7850.14	-6478.22	221109-46A	7.38269	20258.6	6958.86
210701-06B	6.66622	11023	-3499.78	201230-65B	8.34555	8405.71	-3250.44	201230-71H	7.02294	7284.21	-6629.63	221109-46B	7.39598	18903.6	5626.53
210701-06C	4.08943	16835.5	-2085.88	201230-65C	7.53875	12612.7	-420.616	201230-72A	8.3535	11550.6	-92.0016	221109-47A	6.03129	22338.1	6731.53
210701-07A	4.84722	22822.5	5194.72	201230-65D	7.9342	12190.6	-167.754	201230-72B	8.23282	12932.5	1083.97	221109-47B	6.32615	27266	12162.7
210701-07B	4.81299	12975	-4711.27	201230-66A	8.76936	12103.6	1170.91	201230-72C	8.4879	12824.5	1411.33	221109-48A	9.45086	21701.1	11931.8
210701-08A	3.71357	24591.3	5028.38	201230-66B	8.63151	12874	1705.95	201230-72D	8.40605	13009.1	1456.23	221109-48B	9.2142	15359.5	5186.14
210701-08B	3.74372	21617	2105.49	201230-66C	9.31427	8871.69	-1130.85	201230-72E	7.0982	9417.34	-4368.04	221109-49A	7.29288	17912.8	4459.75
210701-09A	4.47105	14206.5	-4063.47	201230-66D	8.87738	6717.37	-4030.95	201230-72F	6.86845	9736.44	-4441.12	221109-49B	7.18256	14289.9	648.559
210701-09B	4.37067	25108.3	6667.04	201230-67A	8.17661	7435.16	-4509.36	201230-72G	11.5803	8744.41	2609.93	221109-51B	10.5437	12960.4	5056.52
210701-09C	5.19492	14835.7	-2198.6	201230-67B	8.12375	7856.57	-4178.18	201230-72H	11.9705	9825.02	4356.63	221109-52A	7.07224	16333	2503.33
210701-10B	2.44815	30972.8	9249.76	201230-67C	8.39066	7723.71	-3855.44	201230-73A	12.5053	12002.7	7447.37	221109-52B	6.96223	14937.3	919.826
210701-11A	2.76467	35214.4	14031.7	201230-67D	8.8533	7921	-2868.41	201230-73B	12.1688	10435.7	5305.89	221109-53A	9.32515	12931.1	2947.16
210701-11B	2.60285	40451.6	18992.7	201230-68A	2.76193	17308.5	-3878.85	201230-73C	7.48317	12118	-1010.18	221109-53B	9.4114	19555.3	9718.55
210701-12A	4.13057	27669.1	8818.02	201230-68B	2.67725	16408.2	-4923.74	201230-73D	7.37107	16244.4	2924.84	221109-54A	8.63507	17995.9	6833.99
210701-12B	4.19828	16353.9	-2381.67	201230-68C	7.18057	8169.53	-5475.23	201230-73E	11.0772	9527.24	2534.06	221109-54B	8.61685	15908.5	4715.45
210701-13A	4.92928	13683.9	-3803.82	201230-68D	6.78628	7563.26	-6754.56	201230-73F	10.4019	11874.4	3728.39	221109-55A	8.81991	16444.9	5598.47
210701-13B	5.41357	11101.6	-5559.42	201230-68E	5.71299	13445.5	-2704.45	201230-74A	11.4259	11590.1	5192.09	221109-55B	8.99377	17372.4	6822.77
210701-14A	7.58101	9549.86	-3411.36	201230-68F	5.76407	4838.03	-11224.7	201230-74B	10.9879	12830.7	5685.16	221109-56A	7.06282	13258.9	-586.861
210701-14B	7.50376	7195.36	-5897.71	201230-69A	9.39968	13323.7	3466.96	201230-74C	10.7404	6077.48	-1490.66	221109-56B	7.07224	12821.1	-1008.62
210701-15A	4.22665	26144	7456.87	201230-69B	8.96195	10147.2	-456.799	201230-74D	10.8332	6936.96	-472.698	221109-57A	7.40163	20683.6	7416.18
210701-15B	2.96092	19636.1	-1211.66	201230-70A	9.86023	12585.2	3514.64	201230-74E	9.66816	13499.8	4101.32	221109-57B	7.25112	14940.6	1416.22
210701-16A	5.76724	11568.5	-4488.84	201230-70B	9.81313	12074.2	2923.23	201230-74F	9.40146	11146	1292.3	221109-58A	7.00849	17183.1	3244.6
210701-16B	5.66854	12422.4	-3803.4	201230-70C	5.03201	10923.2	-6389.13	201230-75A	4.89196	17853.5	302.066	221109-58B	6.72421	15103.2	679.388
210701-17A	6.40727	8269.28	-6695.5	201230-70D	5.48314	11305.8	-5236.52	201230-75B	4.92598	17583.8	90.4203	221109-59A	8.43776	21409.2	9910.49
210701-17B	6.40403	7724.02	-7246.3	210701-21A	3.54537	22020	2169.93	201230-75C	4.62987	16378.9	-1619.96	221109-59B	8.12176	21377.3	9339.15
210701-18A	4.46173	17892.2	-393.649	210701-21B	3.20699	17911.7	-2516	201230-75D	4.80435	23310.5	5609.53	221109-60A	8.68625	12285	1210.39
210701-19A	2.64336	39161.3	17771.6	210701-22A	3.2881	17962.3	-2326.88	201230-75E	5.64998	16015.7	-241.749	221109-60B	8.65506	13339.4	2211.6
210701-19B	3.15078	22993	2469.4	210701-23A	2.86117	26195.2	5177.18	201230-75F	5.60068	16398.9	57.2412	221109-61A	6.35891	19748	4700.68
210701-20A	4.08776	21613.1	2688.92	210701-24A	2.85405	15215.2	-5814.91	201230-75G	7.42613	11703	-1522.61	221109-61B	6.08583	22574.2	7060.71
210701-20B	3.87937	25446.7	6166.8	210701-24B	3.04444	10966	-9739.13	201230-76A	10.3985	9237.56	1085.88	221109-62A	10.193	18484.2	9981.59
210701-26A	8.55577	12033	735.716	210701-25A	3.78276	20130	685.138	201230-76B	10.3851	11110.1	2935.59	221109-62B	10.0568	15064.7	6329.64
210701-26B	7.93426	10807.2	-1551	210701-25B	3.75094	17018.9	-2480.26	201230-76C	11.0511	7565.45	527.609	221109-63A	9.26664	18175.2	8091.41
210701-26C	9.53409	9010.95	-616.365	210701-31A	8.41436	9672.7	-1865.98	201230-76D	10.933	10175.1	2935.69	221109-64A	5.0901	19807.7	2594.55
210701-26D	9.54979	11991.6	2391.13	210701-31B	8.24386	7675.59	-4154.14	201230-76E	6.10865	12294.2	-3180.36	221109-64B	4.8323	15341.2	-2312.09
210701-27A	8.40306	9796.17	-1761.81	210701-31C	5.48987	11845.3	-4685.51	201230-76F	6.24985	7397.94	-7835.58	221109-65A	10.3176	10289.4	1999.57
210701-27B	8.42943	11012.2	-500.795	210701-31D	5.43283	17163.4	535.248	201230-77A	9.14209	13563	3266.52	221109-65B	10.1494	8662.06	85.1344
210701-28A	10.2736	7425.81	-939.225	210701-32A	5.25416	12272.8	-4660.34	201230-77B	9.22007	14510.5	4347.18	221109-66A	9.03019	9743.53	-743.928
210701-28B	10.7738	7450.59	-60.6052	210701-32B	5.14081	8668.4	-8458.24	201230-77C	9.51597	12749.4	3091.18	221109-66B	8.86523	10109.3	-659.736
210701-28C	9.41822	10785.3	960.226	210701-32C	7.25487	11876.7	-1641.22	201230-77D	9.79554	14814.5	5633.51	221109-67A	6.47018	19596.9	4739.51
210701-28D	9.24782	10895.4	779.427	210701-32D	7.25696	10187.9	-3326.42	201230-77E	8.28589	11655.7	-102.276	221109-67B	7.93556	18051.5	5695.46
210701-28E	10.7183	11477.6	3871.76	210701-34A	5.30137	13743.2	-3109.38	201230-77F	8.59142	18110	6873.5	221109-68A	6.74211	10189.7	-4203.49
210701-28F	9.99169	9707.84	861.651	210701-34B	5.16174	13696.8	-3394.14	201230-77G	10.2411	11573.6	3153.19	221109-68B	6.48347	10859.6	-3975.14
210701-28G	9.33093	11425.5	1451.4	210701-34C	7.24806	6120.46	-7409.1	201230-77H	10.602	11187.9	3383.58	221109-69A	4.42419	18795.4	445.543
210701-28H	8.80801	10907.1	40.4197	210701-34D	7.13879	5917.63	-7798.46	201230-78E	4.96879	16871.8	-548.504	221109-69B	4.43508	9488.14	-8843.18
210701-28I	9.08486	5062.04	-5332.11	210701-35A	5.48579	12105.4	-4432.4	201230-78F	5.02437	19496.2	2170.82	221109-70A	7.49374	18956.3	5846.12
210701-28J	9.14085	7067.24	-3231.32	210701-35B	5.73542	10903.9	-5207.75	201230-79A	10.7625	9051.84	1521.4	221109-71B	10.1193	19504.8	10876.4
210701-29A	8.20649	9152.84	-2740.68	210701-36A	4.92865	19953.4	2464.65	201230-79B	10.3798	9399.47	1215.8	221109-72A	3.82276	24524.1	5147.58
210701-29B	7.88915	9315.28	-3119.95	210701-36B	4.9411	15891.2	-1576.29	201230-79C	8.39642	9116.09	-2453.22	221109-72B	3.8954	17744	-1508.57
210701-29C	9.08067	6909.33	-3491.97	210701-36C	2.45255	22535.3	819.797	201230-79D	7.87035	9567.57	-2899.75	221109-73A	6.95731	21044.4	7018.55
210701-29D	9.25976	10594.6	499.016	210701-36D	2.23212	17952.2	-4139.61	201230-80A	5.67521	12812.5	-3401.94	221109-73B	7.05737	24938.5	11083.4
210701-30A	8.66944	10899.6	-203.686	210701-36E	2.73002	9377.9	-11864	201230-80B	5.06791	10802.6	-6448.49	221109-74A	5.32802	18311	1503.91
210701-30B	8.90096	10577.5	-130.559	210701-36F	2.6556	12451	-8917.9	201230-80C	9.7566	10928.9	1681.41	221109-74B	5.10067	11204.5	-5990.69
210701-30C	8.08948	10987.5	-1105.76	210701-36G	4.14888	9167.67	-9652.19	201230-80D	9.51984	11439.9	1788.26	221109-75A	8.89664	11140.8	425.391
210701-51A	10.1547	7298.11	-1269.89	210701-36H	4.39119	11389.9	-7016.31	201230-80E	9.28098	7249.03	-2810.33	221109-75B	8.42782	12981.5	1465.83
210701-51B	10.6155	10306.8	2525.51	210701-37A	5.57601	10726.6	-5657.14	201230-80F	9.46248	7143.92	-2605.62	221109-76A	5.77412	23850	7804.4
210701-51C	8.47015	8519.54	-2923.92	210701-37B	6.04617	7811.33	-7769.85	210826-21A	7.57211	8931.67	-4044.73	221109-76B	5.21968	23832	6839.96
210701-51D	8.40484	7381.73	-4173.21	210701-37C	5.39201	7314.05	-9383.8	210826-21B	7.32489	10125.6	-3272.86	221109-77A	7.9613	18353.5	6041.41
210701-51E	11.3489	10381.3	3851.91	210701-37D	6.12771	7649.77	-7792.23	210826-21C	10.7078	9707.39	2083.63	221109-77B	8.07299	17751.3	5629.91
210701-52A	9.61028	7121.57	-2375.67	210701-38A	6.21123	15092.9	-206.49	210826-21D	11.2708	8377.59	1714.89	221109-78A	10.8162	15179.9	7741.1
210701-52B	9.2384	5999.34	-4132.71	210701-38B	6.24138	13123	-2125.01	210826-21E	8.24051	10202.3	-1633.2	221109-78B	11.0473	15704.1	8659.87
210701-52C	8.33021	5701.69	-5980.64	210701-39A	7.23864	6305.64	-7240	210826-21F	8.11502	7545.75	-4503.92	221109-79A	10.1362	19354.1	10754.7
210701-52D	8.63929	10104.9	-1049.84	210701-39B	6.86655	9160.63	-5020.16	210826-22A	6.83138	12177	-2063.84	221109-79B	10.3094	16048.8	7744.85
210701-52E	12.3397	9789.97	4951.8	210701-40A	6.03163	11628.4	-3977.65	210826-22B	6.64518	12581.4	-1977.23	221109-80A	12.5494	11246.6	6766.41
210701-52F	12.0346	7295.22	1936.23	210701-40B	5.64478	15662.2	-604.114	210826-23A	5.99102	8914.72	-6760.62	221109-80B	12.7916	9496.43	5429.72
210701-53A	7.9734	9241.17	-3050.23	210701-41A	4.55551	12464.3	-5661.46	210826-23B	5.63756	10655.4	-5623.27
210701-53B	7.81986	13205	651.491	210701-41B	4.78075	6048.46	-11692.8	210826-24A	8.04405	11042.1	-1128.67
210701-53C	10.7906	8797.62	1315.19	210701-41C	4.85465	11504.1	-6111.02	210826-24B	8.16243	11191.4	-777.341
210701-53D	11.0488	10267.3	3225.64	210701-41D	4.75459	13782.3	-4003.63	210826-26A	12.2865	8078.5	3149.57
210701-53E	9.86944	9895.11	840.24	210701-43A	7.77925	10875.9	-1746.91	210826-26B	12.1897	6059.45	965.255
210701-54A	8.85197	9276.08	-1515.6	210701-43B	7.3409	12302.9	-1068.21	210826-27A	6.52544	5683.1	-9079.97
210701-54B	8.74794	8446.97	-2522.31	210701-43C	4.16374	17453.7	-1340.78	210826-27B	6.58625	6840.5	-7818.76
210701-55A	10.0069	9045.17	224.894	210701-43D	3.59457	15709	-4057.1	210826-28A	5.71585	8557.4	-7587.65
210701-55B	9.53451	9013.34	-613.254	210701-44A	5.1899	18279.1	1236.25	210826-28B	6.05549	7455.83	-8109.45
210701-56A	10.7943	12906.9	5430.68	210701-44B	4.86208	12290.9	-5311.58	210826-29A	2.71547	17528.4	-3738.29
210701-56B	10.5716	10234.8	2378.61	210701-45A	5.00537	13484.1	-3873.77	210826-30A	7.40307	12345.6	-919.323
210701-56C	6.34447	10611	-4460.98	210701-45B	4.92226	18189.5	689.81	210826-30B	7.83692	9231.74	-3292.64
210701-56D	6.22861	11324.3	-3945.51	210701-63A	7.44452	7176.81	-6017.39	210826-48A	6.70599	13423.7	-1031.18
210701-57A	11.7378	7253.46	1387.96	210701-63B	7.67238	5997.34	-6807.91	210826-48B	6.98901	9854.79	-4116.97
210701-57B	11.5362	9004.89	2795.1	210701-64A	6.34531	13399	-1671.57	210826-49A	6.26472	11432.7	-3775.46
210701-57C	10.4462	6301.74	-1768.67	210701-64B	6.63021	14703.6	119.364	210826-49B	5.89179	13675.6	-2169.13
210701-57D	10.7546	8018.74	474.855	210701-65A	4.51888	12293	-5895.31	210826-50A	5.66592	11233.6	-4996.68
210701-58A	10.7788	8516.41	1013.79	210701-65B	4.80336	12599.2	-5103.46	210826-50B	5.65524	9761.9	-6486.6
210701-58B	10.8562	11450.3	4079.93	210701-66A	9.15059	11365.1	1083.15	210826-51A	5.98233	9697.65	-5992.52
210701-59A	10.7052	8952.56	1324.34	210701-66B	9.45182	9502.36	-265.388	210826-51B	5.89619	10308.7	-5528.47
210701-59B	10.3749	6598.96	-1593.13	210701-67B	8.73318	12843.9	1849.42	210826-52A	5.11872	11391.4	-5772.96
210701-60A	8.7943	11216	325.904	210701-69A	10.7671	9196.97	1674.34	210826-52B	5.06137	12799.3	-4462.98
210701-60B	9.8618	7791.07	-1276.84	210701-69B	10.8104	10229.2	2780.55	210826-53A	4.69294	15746.6	-2144.56
210701-60C	10.4457	7991.69	-79.4465	210701-69C	7.84299	12290.2	-223.868	210826-53B	4.67106	19938	2009.54
210701-60D	10.5239	8339.54	401.87	210701-69D	8.03202	13524.9	1333.5	210826-54A	3.93034	13663.2	-5529.74
210826-01A	7.05443	16177	2316.95	210701-70A	8.65646	11475.3	349.862	210826-54B	4.15087	8677.99	-10138.5
210826-01B	6.66528	11895.8	-2628.61	210701-70B	8.87741	15353.4	4605.14	210826-55A	7.57986	7069.89	-5893.29
210826-02A	4.85214	9279.52	-8339.88	210701-70C	7.99099	8185.65	-4075.73	210826-55B	7.64339	11994.8	-859.911
210826-02B	4.79897	7917.1	-9793.07	210701-70D	7.88925	7035.83	-5399.22	210826-56A	5.65347	15424.5	-827.008
210826-04A	3.46583	22750.7	2764.85	210701-72A	8.43278	14486.1	2978.85	210826-56B	5.62615	13730.5	-2567.69
210826-04B	3.94112	13459.7	-5714.83	210701-72B	8.48093	8573.92	-2851.13	210826-57A	7.60309	15068.2	2144.67
210826-05A	9.30947	12298.7	2287.92	210701-73A	10.2966	14766.5	6440.8	210826-57B	7.61523	9748.95	-3153.85
210826-05B	9.35155	7364.23	-2574.68	210701-73B	10.0829	12455	3764.43	210826-58A	8.64243	7944.48	-3204.89
210826-05C	5.73416	16076.5	-37.2604	210701-74A	9.65215	14613.7	5187.9	210826-58B	8.66347	5400.22	-5713.24
210826-05D	5.74808	14253.6	-1836.39	210701-74B	11.3338	11381.7	4826.56	210826-59A	9.8013	7426.23	-1744.95
210826-05E	9.86724	13336.4	4277.79	210701-74C	9.19811	12151.7	1950.84	210826-59B	9.64106	7999.18	-1445.54
210826-05F	10.3211	8418.4	134.477	210701-74D	10.0488	13356.2	4607.56	210826-60A	3.6671	14458.8	-5183.46
210826-06A	4.61852	10841.9	-7176.3	210701-74E	6.23405	12376.5	-2883.98	210826-60B	3.59499	18742	-1023.38
210826-06B	5.04849	11456.5	-5827.76	210701-74F	6.24211	12544.2	-2702.5	210826-61A	8.87772	7523.57	-3224.15
210826-07A	6.35871	10207.3	-4840.37	210701-75A	8.34151	9352.03	-2311.01	210826-61B	8.57586	7956.43	-3306.58
210826-07B	6.46767	13122.3	-1739.44	210701-75B	7.50261	10910.8	-2184.23	210826-62A	8.96847	7397.34	-3195.48
210826-08A	4.72486	17986.8	150.122	210701-76A	10.1722	12474.4	3936.37	210826-62B	9.16807	6246.71	-4005.4
210826-08B	4.24978	26966.5	8318.91	210701-76B	10.0462	13236.6	4483.55	210826-64A	4.90772	13323.8	-4200.74
210826-09A	4.31603	16538.4	-1996.14	210701-77A	11.9463	11732.1	6222.46	210826-64B	4.89495	14343.5	-3202.85
210826-09B	4.15977	20592.7	1791.46	210701-77B	11.5422	11629.3	5429.84	210826-65A	5.31121	12916.8	-3918.96
210826-10A	4.65871	14439.3	-3510.23	210701-77C	10.1645	9742.19	1190.98	210826-65B	5.52316	10685.8	-5788.19
210826-10B	4.8244	12670.9	-4995.82	210701-77D	10.1341	10303.5	1700.51
210826-31A	8.80111	6162.81	-4715.7	210701-77E	9.10799	10971.4	616.771
210826-31B	9.44721	6164.98	-3610.63	210701-77F	8.93989	10337.7	-303.867
210826-31C	10.8901	5127.96	-2184.56	210701-78A	11.8518	12744.6	7073.62
210826-31D	10.7644	7628.98	101.887	210701-78B	11.7664	11551.2	5734.45
210826-32C	8.49988	5595.03	-5797.68	210701-80A	11.2326	9932.03	3204.1
210826-32D	8.62254	6990.99	-4192.33	210701-80B	12.1624	7964.64	2823.81
210826-33A	12.4609	8674.67	4043.39	210701-80C	6.1858	13917.2	-1425.6
210826-33B	12.6903	6151.35	1911.71	210826-11A	2.62452	18314.5	-3107.42
210826-33C	9.33637	9273.03	-691.787	210826-11B	2.77942	24214.6	3057.06
210826-33D	9.42911	6618.54	-3187.98	210826-12A	5.23951	12602.2	-4355.95
210826-34A	6.7151	9591.49	-4847.84	210826-12B	5.40499	10549.4	-6126.31
210826-34B	6.7689	10955.8	-3391.71	210826-13A	2.54152	20412.6	-1151
210826-35A	4.62239	18229.1	217.51	210826-13B	2.93894	14118.5	-6766.71
210826-35B	4.28317	19719.9	1129.28	210826-14A	3.74037	12097.1	-7420.05
210826-35C	8.05965	5051.04	-7093.14	210826-14B	3.60263	12311.1	-7441.27
210826-35D	8.26458	6160.86	-5633.49	210826-15A	4.07258	14605.4	-4344.68
210826-35E	7.83838	5163.64	-7358.24	210826-15B	3.83174	14099.6	-5261.67
210826-35F	7.91657	6081.98	-6306.44	210826-17A	6.30952	12034.7	-3096.95
210826-37A	12.3668	8740.98	3949.09	210826-17B	6.21406	11157.5	-4137.09
210826-37B	12.2448	7276.11	2276.07	210826-18A	3.50393	16218.3	-3702.5
210826-38A	7.56761	7498.16	-5485.93	210826-18B	3.38816	14532.8	-5585.57
210826-38B	7.23739	7022.55	-6525.23	210826-19A	2.98185	13572.4	-7239.59
210826-39A	10.3134	8610.82	313.854	210826-19B	3.35499	13479.1	-6695.91
210826-39B	10.0189	7493.74	-1305.99	210826-20A	4.41003	14399.2	-3974.89
210826-43A	3.14502	23556.1	3022.61	210826-20B	4.76893	8587.67	-9173.77
210826-43B	3.35457	24883.1	4707.32	210826-41A	4.67933	13813.8	-4100.63
210826-44A	5.00642	26046.9	8690.88	210826-41B	5.13107	13080.7	-4062.53
210826-45A	3.32034	16022	-4212.17	210826-42A	7.92536	12473.1	99.7019
210826-45B	3.25231	15587.4	-4762.89	210826-42B	8.40766	8402.67	-3147.45
210826-46A	7.82111	11145.6	-1405.81
210826-46B	7.76491	11379.7	-1267.58
210826-47A	7.44264	13380.5	183.086
210826-47B	7.5518	14640.2	1629.13
221109-03A	3.21463	31837.4	11422.8
221109-03B	3.11372	19181.2	-1405.68
221109-04A	4.65886	18141.3	191.961
221109-04B	4.27399	12067.7	-6538.59
221109-05A	3.26225	20309.6	-23.7265
221109-05B	2.82117	20505.1	-581.212
221109-11A	5.28228	22657.5	5772.35
221109-11B	5.29452	21061.9	4197.64
221109-12A	7.95743	13165.9	847.265
221109-12B	7.66917	12209.9	-600.838
221109-13A	4.72093	26877.6	9034.19
221109-13B	4.9936	13814.8	-3563.14
221109-14A	7.55927	12087.3	-911.08
221109-14B	7.68696	13809.7	1029.33
221109-15A	5.14798	14814	-2300.37
221109-15B	5.36915	10484.5	-6252.38
221109-31A	7.89379	5436.53	-6990.77
221109-31B	7.45439	6147.32	-7030.04
221109-33A	10.0576	13903.5	5169.85
221109-33B	10.5662	12328.5	4463.04
221109-34A	9.31333	12578.6	2574.49
221109-34B	9.2566	17015.7	6914.71
221109-35A	9.88472	16057.6	7028.83
221109-35B	10.1133	11849	3210.45
