# Supplementary material for: Testing the ion-current model for flagellar length sensing and IFT regulation
Source: eLife. 2023 Jan 13;12:e82901. doi: 10.7554/eLife.82901 (PMC9891718; doi:10.7554/eLife.82901)
Supplement: Figure 5—source data 1. [file elife-82901-fig5-data1.xlsx]

## Sheet: Regeneration data
		Control				ppr2				EGTA				CaCl2
Time		Flagellum 1	Flagellum 2	Average (px)	Length (um)	Flagellum 1	Flagellum 2	Average (px)	Length (um)	Flagellum 1	Flagellum 2	Average (px)	Length (um)	Flagellum 1	Flagellum 2	Average (px)	Length (um)
Pre	1	80.3172	89.1843	84.7507	13.3059	76.2466	73.5329	74.8897	11.7577
Pre	2	69.2325	63.004	66.1182	10.3806	36.1009	38.0806	37.0908	5.82325
Pre	3	78.4851	85.1726	81.8289	12.8471	71.7151	69.2312	70.4731	11.0643
Pre	4	77.9012	84.1364	81.0188	12.72	58.791	60.4751	59.6331	9.36239
Pre	5	73.7843	77.3628	75.5735	11.865	79.5911	75.6551	77.6231	12.1868
Pre	6	90.4969	90.7422	90.6195	14.2273	67.9738	67.8916	67.9327	10.6654
Pre	7	75.1529	65.2057	70.1793	11.0181	73.9904	69.2335	71.6119	11.2431
Pre	8	94.1792	85.8697	90.0245	14.1338	78.066	77.1179	77.592	12.1819
Pre	9	90.9522	93.0674	92.0098	14.4455	69.0011	68.2435	68.6223	10.7737
Pre	10	72.8232	71.5117	72.1674	11.3303	89.1386	87.0614	88.1	13.8317
Pre	11	72.3001	76.4619	74.381	11.6778	82.1034	81.1458	81.6246	12.8151
Pre	12	86.7059	90.0999	88.4029	13.8793	62.3073	65.5304	63.9188	10.0353
Pre	13	88.1525	84.4403	86.2964	13.5485	73.0532	70.8242	71.9387	11.2944
Pre	14	83.5939	79.1527	81.3733	12.7756	56.8842	58.5181	57.7011	9.05908
Pre	15	87.4183	90.6888	89.0536	13.9814	86.4858	78.323	82.4044	12.9375
Pre	16	87.6156	86.1495	86.8826	13.6406	67.8144	62.5999	65.2072	10.2375
Pre	17	83.9167	80.3148	82.1157	12.8922	47.4039	43.9801	45.692	7.17365
Pre	18	79.3112	81.2827	80.2969	12.6066	70.6985	69.2241	69.9613	10.9839
Pre	19	70.687	71.4889	71.088	11.1608	37.2631	42.0199	39.6415	6.22372
Pre	20	80.3961	77.0962	78.7461	12.3631	76.2546	79.8917	78.0732	12.2575
30	1	28.3414	28.0179	28.1796	4.4242	9.21954	12.6491	10.9343	1.71669	22.9557	20.145	21.5504	3.38341	23.4787	25.6364	24.5576	3.85554
30	2	46.5301	45.4017	45.9659	7.21664	13.4164	16.2788	14.8476	2.33108	18.0499	21.5284	19.7892	3.1069	23.2938	21.9595	22.6266	3.55238
30	3	24.3718	25.0988	24.7353	3.88344	24	15.1327	19.5664	3.07192	21.6093	24.0312	22.8203	3.58278	29.6584	29.6584	29.6584	4.65637
30	4	21.9317	24.3311	23.1314	3.63163	30.2077	30.5276	30.3677	4.76773	17.1796	14.4654	15.8225	2.48413	34.8292	33.799	34.3141	5.38731
30	5	35.3178	29.985	32.6514	5.12627	15.8114	13.6015	14.7064	2.30891	15	18.9737	16.9868	2.66693	37.8774	38.6887	38.2831	6.01044
30	6	45.6012	41.0266	43.3139	6.80028	22.885	26.5958	24.7404	3.88425	11.0454	16.2788	13.6621	2.14495	29.4884	29.6202	29.5543	4.64003
30	7	40.8995	45.2056	43.0525	6.75925	24.3516	21.587	22.9693	3.60618	14.0433	15.6444	14.8438	2.33048	43.3816	40.3084	41.845	6.56966
30	8	28.3506	31.9669	30.1587	4.73492	12.6491	15.5242	14.0866	2.2116	23.8551	25.9793	24.9172	3.91199	21.4787	20.217	20.8478	3.27311
30	9	35.3225	35.9414	35.6319	5.59421	11.4018	12.2066	11.8042	1.85325	20.307	17.4883	18.8977	2.96693	37.1134	33.8208	35.4671	5.56833
30	10	39.047	42.2211	40.634	6.37954	9.05539	9.43398	9.24468	1.45142	21.544	20	20.772	3.2612	47.2166	49.2741	48.2454	7.57452
30	11	40.1449	36.2473	38.1961	5.99679	0	0	0	0	0	0	0	0	31.4047	31.3773	31.391	4.92839
30	12	26.9072	23	24.9536	3.91772	0	0	0	0	0	0	0	0	35.6938	34.8688	35.2813	5.53917
30	13	29.6049	28.2064	28.9057	4.53819	0	0	0	0	0	0	0	0	31.547	31.8047	31.6758	4.97311
30	14	34.0752	36.8951	35.4852	5.57117	0	0	0	0	0	0	0	0	31.0247	35.4722	33.2484	5.22
30	15	22.4491	20.2572	21.3531	3.35244	0	0	0	0	0	0	0	0	25.2051	23.1975	24.2013	3.79961
30	16	28.4819	29.2708	28.8763	4.53358	0	0	0	0	0	0	0	0	41.7313	42.0104	41.8709	6.57372
30	17	35.2279	38.8885	37.0582	5.81814	0	0	0	0	0	0	0	0	39.0994	33.5639	36.3316	5.70407
30	18	15.6205	15.2643	15.4424	2.42446	0	0	0	0	0	0	0	0	28	29.6757	28.8378	4.52754
30	19	48.0119	48.0927	48.0523	7.54422	0	0	0	0	0	0	0	0	47.3424	46.869	47.1057	7.3956
30	20	33.4578	36.613	35.0354	5.50056	0	0	0	0	0	0	0	0	44.7757	50.3668	47.5712	7.46869
60	1	55.6094	55.8786	55.744	8.7518	30.1292	34.9571	32.5432	5.10928	49.5924	48.5426	49.0675	7.7036	66.3496	71.4074	68.8785	10.8139
60	2	51.4776	52.7866	52.1321	8.18474	37.7939	35.0035	36.3987	5.7146	39.6649	38.0249	38.8449	6.09865	61.7932	57.513	59.6531	9.36554
60	3	61.6395	60.8433	61.2414	9.6149	39.46	35.4556	37.4578	5.88087	26.4205	19.767	23.0937	3.62571	57.5569	54.793	56.175	8.81947
60	4	67.356	71.7165	69.5362	10.9172	44.9687	43.7681	44.3684	6.96584	58.4109	52.1314	55.2711	8.67757	85.2643	82.6364	83.9503	13.1802
60	5	73.2284	78.1221	75.6752	11.881	17.8885	18.1108	17.9997	2.82595	57.6736	58.6958	58.1847	9.13499	78.1093	79.0545	78.5819	12.3374
60	6	73.5946	69.9577	71.7761	11.2689	35.9225	34.2866	35.1045	5.51141	24.7656	19.434	22.0998	3.46966	68.4086	62.464	65.4363	10.2735
60	7	70.3866	70.1834	70.285	11.0347	28.5242	30.5941	29.5591	4.64079	30.8364	34.2552	32.5458	5.10969	56.3548	59.7577	58.0563	9.11483
60	8	60.3619	54.142	57.2519	8.98856	35.2348	34.4165	34.8256	5.46762	70.4446	67.929	69.1868	10.8623	70.245	67.893	69.069	10.8438
60	9	64.6155	61.1789	62.8972	9.87486	25.3181	26.4415	25.8798	4.06313	21.4536	28.4579	24.9557	3.91805	62.5962	62.4732	62.5347	9.81795
60	10	74.3538	78.8651	76.6094	12.0277	39.1482	42.9557	41.0519	6.44515	42.3859	42.2825	42.3342	6.64646	78.6222	81.9055	80.2638	12.6014
60	11	56.7259	60.4034	58.5647	9.19466	37.8341	38.0263	37.9302	5.95504	40.3342	41.6213	40.9777	6.4335	66.3767	71.9907	69.1837	10.8618
60	12	66.5574	62.3471	64.4523	10.119	21.097	16.1245	18.6107	2.92189	49.8277	40.7927	45.3102	7.1137	65.3808	63.5067	64.4437	10.1177
60	13	69.4489	63.8309	66.6399	10.4625	24.311	21.8062	23.0586	3.62021	37.5468	43.6911	40.619	6.37718	74.7471	70.9036	72.8253	11.4336
60	14	65.766	65.0514	65.4087	10.2692	14.0357	12.083	13.0594	2.05032	29.2087	32.3558	30.7823	4.83281	79.2597	81.2879	80.2738	12.603
60	15	74.019	69.0001	71.5096	11.227	33.7924	38.8088	36.3006	5.6992	54.9449	63.2469	59.0959	9.27806	67.2978	71.6991	69.4984	10.9113
60	16	73.9521	69.9468	71.9494	11.2961	26.7336	25.4995	26.1165	4.10029	31.2357	30.1554	30.6955	4.8192	63.6899	62.7111	63.2005	9.92248
60	17	64.0567	63.9204	63.9886	10.0462	22.0499	25.5284	23.7891	3.73489	51.0475	45.5179	48.2827	7.58038	52.5078	54.2257	53.3668	8.37858
60	18	62.7342	59.9554	61.3448	9.63113	11.4018	12.0416	11.7217	1.8403	22.2111	24.4222	23.3167	3.66071	58.1934	51.9404	55.0669	8.64551
60	19	78.9892	70.3216	74.6554	11.7209	0	0	0	0	48.2686	51.7176	49.9931	7.84891	65.6141	65.359	65.4865	10.2814
60	20	73.5379	72.6193	73.0786	11.4733	0	0	0	0	57.435	56.9172	57.1761	8.97665	76.3141	75.6747	75.9944	11.9311
90	1	65.9009	63.1778	64.5394	10.1327	34.1871	33.1433	33.6652	5.28543	70.0803	72.81	71.4451	11.2169	78.8233	75.2802	77.0517	12.0971
90	2	71.0757	76.7473	73.9115	11.6041	43.0865	38.6729	40.8797	6.41811	70.9053	68.3512	69.6282	10.9316	54.961	50.523	52.742	8.28049
90	3	63.3173	59.7342	61.5258	9.65954	41.16	43.423	42.2915	6.63977	60.8757	53.6103	57.243	8.98715	82.3656	76.5997	79.4826	12.4788
90	4	95.2747	97.4895	96.3821	15.132	41.1053	45.2551	43.1802	6.77929	83.9829	85.1377	84.5603	13.276	85.1011	80.2796	82.6903	12.9824
90	5	67.7959	74.6944	71.2451	11.1855	37.3398	40.4286	38.8842	6.10482	48.5591	55.93	52.2445	8.20239	53.1782	58.6708	55.9245	8.78015
90	6	55.4576	55.7357	55.5967	8.72868	60.407	60.251	60.329	9.47165	57.6428	56.9359	57.2894	8.99443	65.0974	62.166	63.6317	9.99018
90	7	73.2682	68.115	70.6916	11.0986	48.5561	49.4292	48.9926	7.69184	65.7237	68.4938	67.1087	10.5361	66.5971	71.1625	68.8798	10.8141
90	8	70.7066	68.379	69.5428	10.9182	35.4755	30.7495	33.1125	5.19867	68.5189	71.0816	69.8002	10.9586	89.5644	89.5241	89.5443	14.0584
90	9	71.2517	69.5714	70.4115	11.0546	27.2631	25.7466	26.5049	4.16126	48.6123	42.9963	45.8043	7.19128	74.7096	79.136	76.9228	12.0769
90	10	64.0837	61.6362	62.8599	9.86901	44.8606	46.1641	45.5123	7.14544	71.1997	70.1393	70.6695	11.0951	85.5124	83.1723	84.3423	13.2417
90	11	83.8117	85.662	84.7368	13.3037	40.9812	37.8552	39.4182	6.18866	46.5665	50.0779	48.3222	7.58659	72.1384	73.2348	72.6866	11.4118
90	12	99.7324	94.7651	97.2487	15.2681	25.53	27.1743	26.3522	4.13729	38.3047	43.1078	40.7062	6.39088	60.8415	62.9782	61.9099	9.71985
90	13	86.2484	89.7909	88.0196	13.8191	35.4331	33.8728	34.653	5.44052	79.1851	77.7275	78.4563	12.3176	61.8412	54.6811	58.2611	9.147
90	14	63.7753	65.3311	64.5532	10.1349	43.9286	50.9192	47.4239	7.44555	70.581	62.8628	66.7219	10.4753	84.7276	87.2904	86.009	13.5034
90	15	77.0134	72.0816	74.5475	11.704	39.7567	34.6042	37.1805	5.83733	66.6418	65.6478	66.1448	10.3847	80.2906	79.8888	80.0897	12.5741
90	16	82.4598	87.5559	85.0078	13.3462	40.1647	39.3374	39.751	6.24091	68.5087	62.2712	65.3899	10.2662	80.5434	75.4733	78.0083	12.2473
90	17	81.1165	78.1171	79.6168	12.4998	34.8925	37.2624	36.0775	5.66416	66.1951	60.6793	63.4372	9.95964	68.9064	69.6057	69.256	10.8732
90	18	83.6148	82.19	82.9024	13.0157	47.7958	42.5015	45.1487	7.08834	35.1737	37.1803	36.177	5.67979	66.0211	70.9899	68.5055	10.7554
90	19	80.7353	78.1351	79.4352	12.4713	45.7924	43.2832	44.5378	6.99244	70.6867	73.0335	71.8601	11.282	78.0784	73.5706	75.8245	11.9044
90	20	77.7895	73.0705	75.43	11.8425	51.6441	46.5036	49.0739	7.7046	64.1739	60.8434	62.5087	9.81386	46.3347	47.0067	46.6707	7.3273
120	1	77.8166	76.5611	77.1888	12.1186	45.4165	41.0691	43.2428	6.78912	69.5846	73.2676	71.4261	11.2139	73.3008	78.0254	75.6631	11.8791
120	2	57.4334	53.905	55.6692	8.74006	43.4033	48.9917	46.1975	7.25301	75.4545	77.8405	76.6475	12.0337	89.514	89.8101	89.6621	14.0769
120	3	71.0276	65.849	68.4383	10.7448	58.681	58.2128	58.4469	9.17617	54.1169	50.9779	52.5474	8.24994	90.6286	88.1989	89.4137	14.038
120	4	86.6862	81.6843	84.1852	13.2171	59.243	50.4032	54.8231	8.60723	67.7776	71.1608	69.4692	10.9067	77.4029	70.4011	73.902	11.6026
120	5	91.4863	93.6961	92.5912	14.5368	58.8438	53.4845	56.1641	8.81777	79.14	77.357	78.2485	12.285	69.8105	71.3037	70.5571	11.0775
120	6	70.1607	77.3947	73.7777	11.5831	61.9937	55.5793	58.7865	9.22948	29.1796	32.8751	31.0274	4.87129	85.5519	83.7731	84.6625	13.292
120	7	85.437	80.9683	83.2027	13.0628	31.2749	28.4176	29.8463	4.68586	81.0519	81.8619	81.4569	12.7887	64.8415	65.6913	65.2664	10.2468
120	8	65.5312	69.2013	67.3663	10.5765	44.2315	46.499	45.3653	7.12235	74.3401	73.3133	73.8267	11.5908	74.5515	70.4542	72.5028	11.3829
120	9	80.7438	76.3487	78.5463	12.3318	63.4685	63.1397	63.3041	9.93874	86.7158	88.0903	87.403	13.7223	79.5651	76.0284	77.7968	12.2141
120	10	62.9225	63.3471	63.1348	9.91216	53.797	55.462	54.6295	8.57684	76.6076	73.9709	75.2892	11.8204	79.28	77.9263	78.6031	12.3407
120	11	77.7475	77.2511	77.4993	12.1674	38.5696	41.4865	40.028	6.2844	75.2541	75.2466	75.2504	11.8143	81.0368	74.401	77.7189	12.2019
120	12	90.0587	85.2081	87.6334	13.7584	52.0969	49.3523	50.7246	7.96377	47.0143	46.3584	46.6863	7.32975	89.511	90.5955	90.0533	14.1384
120	13	84.062	78.0779	81.07	12.728	56.3353	52.8235	54.5794	8.56897	68.0743	66.0922	67.0832	10.5321	80.4956	76.6205	78.5581	12.3336
120	14	78.3074	75.128	76.7177	12.0447	69.029	68.1396	68.5843	10.7677	52.2068	49.9	51.0534	8.01539	78.5273	78.2662	78.3968	12.3083
120	15	90.1664	94.5778	92.3721	14.5024	66.3477	62.9688	64.6582	10.1513	66.4496	65.1829	65.8162	10.3331	95.0565	95.9295	95.493	14.9924
120	16	80.4751	80.0965	80.2858	12.6049	58.7161	56.7624	57.7393	9.06506	63.2689	59.5879	61.4284	9.64426	71.6267	73.7905	72.7086	11.4153
120	17	84.9794	80.7448	82.8621	13.0093	33.2016	35.2952	34.2484	5.377	83.7041	84.4886	84.0963	13.2031	69.1357	74.1579	71.6468	11.2486
120	18	86.3012	96.342	91.3216	14.3375	54.7339	56.0628	55.3983	8.69754	72.6842	74.0758	73.38	11.5207	94.2615	94.2059	94.2337	14.7947
120	19	88.772	83.6302	86.2011	13.5336	44.9592	41.7718	43.3655	6.80838	76.9619	78.6813	77.8216	12.218	88.0602	85.1176	86.5889	13.5945
120	20	86.7494	75.8611	81.3052	12.7649	43.8292	41.8062	42.8177	6.72238	37.9646	44.0718	41.0182	6.43986	64.1878	60.123	62.1554	9.7584
150	1	76.7434	68.7449	72.7442	11.4208	52.2451	57.8182	55.0317	8.63997	76.2771	73.16	74.7186	11.7308	95.1162	94.0608	94.5885	14.8504
150	2	80.3724	72.6914	76.5319	12.0155	60.6494	65.7148	63.1821	9.91959	67.7138	62.6794	65.1966	10.2359	93.1086	92.5497	92.8291	14.5742
150	3	87.7627	81.6852	84.724	13.3017	48.5086	47.4844	47.9965	7.53546	59.8901	57.4789	58.6845	9.21346	65.8242	70.7058	68.265	10.7176
150	4	81.21	84.4631	82.8366	13.0053	59.8552	56.5586	58.2069	9.13848	70.9657	71.1229	71.0443	11.154	62.7925	60.2549	61.5237	9.65922
150	5	79.7108	83.944	81.8274	12.8469	38.6399	37.5585	38.0992	5.98158	59.441	57.1516	58.2963	9.15252	89.6573	87.8857	88.7715	13.9371
150	6	67.1274	64.9181	66.0227	10.3656	60.6007	60.5783	60.5895	9.51256	74.7742	73.4953	74.1348	11.6392	81.2335	79.3028	80.2682	12.6021
150	7	61.0144	64.417	62.7157	9.84636	67.3351	68.206	67.7706	10.64	72.8403	71.9281	72.3842	11.3643	85.1281	79.1841	82.1561	12.8985
150	8	67.0261	65.2938	66.1599	10.3871	73.0088	69.8857	71.4473	11.2172	62.7276	67.6954	65.2115	10.2382	92.0282	88.8919	90.4601	14.2022
150	9	87.339	94.3269	90.8329	14.2608	60.9511	57.2238	59.0874	9.27673	82.1326	78.8457	80.4892	12.6368	65.7103	70.444	68.0772	10.6881
150	10	71.4716	69.682	70.5768	11.0806	50.6347	49.7111	50.1729	7.87715	60.0436	58.372	59.2078	9.29562	87.1581	81.4047	84.2814	13.2322
150	11	76.2563	74.8376	75.5469	11.8609	57.2657	57.8381	57.5519	9.03565	69.1656	73.0614	71.1135	11.1648	63.1188	65.677	64.3979	10.1105
150	12	82.3	80.2202	81.2601	12.7578	59.2331	60.2798	59.7564	9.38176	66.5807	64.1584	65.3696	10.263	77.4432	77.6043	77.5238	12.1712
150	13	77.3855	80.9962	79.1908	12.433	49.4503	45.9241	47.6872	7.48689	78.357	78.4476	78.4023	12.3092	71.4253	66.239	68.8321	10.8066
150	14	78.9147	75.0788	76.9968	12.0885	44.9101	47.7719	46.341	7.27553	61.1113	65.5382	63.3248	9.94199	93.9203	94.0701	93.9952	14.7572
150	15	85.3067	84.5266	84.9166	13.3319	52.4924	52.4291	52.4607	8.23634	62.6263	66.1019	64.3641	10.1052	91.4653	92.7027	92.084	14.4572
150	16	78.3159	78.3054	78.3107	12.2948	39.4591	40.4085	39.9338	6.26961	85.1052	85.4987	85.3019	13.3924	72.2742	75.4424	73.8583	11.5958
150	17	89.9426	97.2185	93.5805	14.6921	58.691	55.7275	57.2093	8.98186	63.0137	66.0046	64.5091	10.1279	80.8667	81.4329	81.1498	12.7405
150	18	83.2408	80.8575	82.0491	12.8817	42.0777	46.5138	44.2958	6.95444	52.9742	51.7703	52.3722	8.22244	64.3745	64.0013	64.1879	10.0775
150	19	75.0614	72.9401	74.0007	11.6181	20.5856	18.6129	19.5992	3.07708	71.3805	70.737	71.0587	11.1562	69.1643	64.1426	66.6535	10.4646
150	20	91.9138	86.9896	89.4517	14.0439	71.9634	70.5203	71.2419	11.185	69.0199	71.0507	70.0353	10.9955	79.1317	74.9376	77.0346	12.0944
180	1	66.4573	63.1327	64.795	10.1728	63.739	59.0748	61.4069	9.64088	76.9527	77.0971	77.0249	12.0929	88.5086	87.9305	88.2195	13.8505
180	2	62.8612	67.3798	65.1205	10.2239	40.0312	34.8945	37.4628	5.88167	90.2365	87.3292	88.7828	13.9389	75.3694	77.5187	76.4441	12.0017
180	3	82.5408	79.8297	81.1852	12.7461	53.4815	60.0311	56.7563	8.91074	73.2833	78.8211	76.0522	11.9402	90.8822	85.9488	88.4155	13.8812
180	4	83.3499	77.8687	80.6093	12.6557	64.7863	59.2891	62.0377	9.73992	57.0801	59.8579	58.469	9.17963	79.8662	81.0264	80.4463	12.6301
180	5	67.7369	69.4171	68.577	10.7666	63.3571	63.8534	63.6053	9.98603	80.5222	80.7119	80.617	12.6569	74.2073	69.6816	71.9444	11.2953
180	6	83.4125	83.6334	83.5229	13.1131	45.7108	43.4749	44.5929	7.00108	87.7021	87.6422	87.6721	13.7645	81.7511	75.5031	78.6271	12.3445
180	7	84.2306	80.946	82.5883	12.9664	52.3471	52.1298	52.2385	8.20144	68.68	69.1091	68.8946	10.8164	72.6512	71.0109	71.831	11.2775
180	8	84.1017	86.3101	85.2059	13.3773	35.1051	39.907	37.506	5.88844	89.6883	91.9137	90.801	14.2558	91.4456	90.3466	90.8961	14.2707
180	9	85.1673	86.5937	85.8805	13.4832	61.5562	56.4472	59.0017	9.26327	70.0368	72.9256	71.4812	11.2225	87.7882	86.8318	87.31	13.7077
180	10	69.1539	68.5212	68.8375	10.8075	70.5769	65.7253	68.1511	10.6997	68.0525	67.4906	67.7715	10.6401	81.1007	87.2087	84.1547	13.2123
180	11	83.9468	82.7532	83.35	13.086	66.4484	69.0581	67.7532	10.6373	70.3166	75.5039	72.9102	11.4469	62.0504	57.756	59.9032	9.4048
180	12	89.5011	83.1842	86.3426	13.5558	56.3682	57.3894	56.8788	8.92997	57.7486	59.2893	58.519	9.18748	83.2335	89.7507	86.4921	13.5793
180	13	89.0437	83.5522	86.298	13.5488	44.4589	45.8333	45.1461	7.08794	76.1425	75.0154	75.579	11.8659	85.2999	84.0034	84.6517	13.2903
180	14	76.6479	78.5229	77.5854	12.1809	70.3136	71.8359	71.0747	11.1587	70.1861	75.2198	72.703	11.4144	59.1179	62.6846	60.9012	9.5615
180	15	75.3176	74.6879	75.0027	11.7754	28.629	30.2739	29.4514	4.62387	67.6421	68.6547	68.1484	10.6993	84.6305	86.9626	85.7965	13.4701
180	16	67.5695	73.3593	70.4644	11.0629	56.1821	55.2246	55.7034	8.74543	67.5078	65.2785	66.3931	10.4237	83.1258	77.3093	80.2176	12.5942
180	17	79.9641	74.0618	77.013	12.091	63.7745	65.9281	64.8513	10.1817	70.6457	72.0244	71.335	11.1996	72.9535	77.6677	75.3106	11.8238
180	18	85.4096	85.5447	85.4772	13.4199	56.7684	55.6336	56.201	8.82355	88.0911	88.6218	88.3565	13.872	76.5875	78	77.2938	12.1351
180	19	91.5355	84.7892	88.1623	13.8415	47.7026	51.5112	49.6069	7.78828	75.4035	82.1072	78.7554	12.3646	73.7194	69.0344	71.3769	11.2062
180	20	91.6039	89.4319	90.5179	14.2113	66.6076	62.7806	64.6941	10.157	49.9004	48.0355	48.9679	7.68796	81.8001	86.7584	84.2793	13.2318
240	1	69.9575	65.8054	67.8814	10.6574	47.1368	51.28	49.2084	7.72572	59.4839	58.2119	58.8479	9.23913	71.567	65.8831	68.725	10.7898
240	2	73.1429	77.5697	75.3563	11.8309	51.3005	52.487	51.8938	8.14732	67.9059	73.5987	70.7523	11.1081	60.6554	61.8549	61.2551	9.61706
240	3	74.6996	72.0618	73.3807	11.5208	66.2319	64.9017	65.5668	10.294	81.2562	82.3416	81.7989	12.8424	80.6663	81.8952	81.2808	12.7611
240	4	84.7915	83.2838	84.0376	13.1939	76.7338	70.9435	73.8387	11.5927	70.0892	70.4199	70.2546	11.03	90.4598	94.8247	92.6422	14.5448
240	5	77.8665	83.3788	80.6227	12.6578	57.6265	56.3515	56.989	8.94727	79.1284	78.7665	78.9474	12.3947	75.6847	78.3721	77.0284	12.0935
240	6	62.7783	61.7487	62.2635	9.77538	51.8479	55.4655	53.6567	8.42411	88.5378	92.5672	90.5525	14.2167	83.0554	84.4397	83.7475	13.1484
240	7	82.2975	78.2602	80.2788	12.6038	69.6777	66.7828	68.2303	10.7122	70.8966	67.0524	68.9745	10.829	74.7454	72.8343	73.7898	11.585
240	8	81.2948	72.9991	77.1469	12.1121	58.3355	55.9124	57.1239	8.96846	52.1035	55.3223	53.7129	8.43292	71.4159	77.0785	74.2472	11.6568
240	9	77.9177	80.2468	79.0822	12.4159	66.8748	64.1939	65.5344	10.2889	90.9738	89.3215	90.1477	14.1532	81.315	75.9959	78.6554	12.3489
240	10	68.6663	68.366	68.5162	10.757	36.5804	39.5393	38.0599	5.9754	83.476	85.4193	84.4477	13.2583	67.4639	70.4128	68.9384	10.8233
240	11	71.1982	77.3445	74.2714	11.6606	59.2937	57.9362	58.615	9.20255	67.2966	68.2824	67.7895	10.6429	83.8648	90.4038	87.1343	13.6801
240	12	75.0578	76.0625	75.5601	11.8629	78.7322	78.2709	78.5016	12.3247	65.8316	72.6833	69.2575	10.8734	74.555	78.5745	76.5648	12.0207
240	13	78.1703	77.206	77.6881	12.197	44.3257	43.2594	43.7926	6.87543	82.518	85.3518	83.9349	13.1778	94.8201	93.1221	93.9711	14.7535
240	14	66.4635	79.7735	73.1185	11.4796	84.1328	86.5017	85.3173	13.3948	73.8639	69.1124	71.4882	11.2236	79.5268	77.2085	78.3676	12.3037
240	15	78.8997	71.5888	75.2443	11.8133	60.3846	54.5547	57.4697	9.02274	72.0882	74.9646	73.5264	11.5436	73.1153	69.5615	71.3384	11.2001
240	16	88.8618	92.7208	90.7913	14.2542	74.4288	75.0649	74.7468	11.7353	92.7186	89.4489	91.0837	14.3001	83.2247	77.5698	80.3972	12.6224
240	17	83.0307	87.3318	85.1813	13.3735	71.0984	64.1209	67.6097	10.6147	72.2096	73.9321	73.0708	11.4721	78.8189	80.6094	79.7141	12.5151
240	18	74.3845	68.9667	71.6756	11.2531	52.581	54.4488	53.5149	8.40184	71.8393	76.691	74.2652	11.6596	76.1914	80.3023	78.2468	12.2848
240	19	79.931	82.5042	81.2176	12.7512	39.5491	46.0472	42.7981	6.71931	70.4223	68.127	69.2746	10.8761	64.9485	70.0424	67.4954	10.5968
240	20	80.4926	85.5596	83.0261	13.0351	54.8109	50.9328	52.8718	8.30088	77.0681	85.1144	81.0913	12.7313	95.2923	92.3009	93.7966	14.7261
300	1	92.2429	98.5248	95.3838	14.9753	77.252	74.5251	75.8885	11.9145	85.0784	83.644	84.3612	13.2447	90.7626	86.7674	88.765	13.9361
300	2	66.1169	69.876	67.9965	10.6754	69.7957	69.7909	69.7933	10.9575	73.4179	74.8773	74.1476	11.6412	80.6174	79.917	80.2672	12.602
300	3	66.6153	64.6864	65.6508	10.3072	66.4909	69.3869	67.9389	10.6664	73.7924	73.5337	73.663	11.5651	85.1855	90.6261	87.9058	13.8012
300	4	68.3164	67.9188	68.1176	10.6945	62.7069	61.0609	61.8839	9.71577	79.4148	79.1583	79.2865	12.448	89.0492	86.7264	87.8878	13.7984
300	5	76.1975	77.1734	76.6855	12.0396	67.2352	66.1128	66.674	10.4678	78.5377	73.4517	75.9947	11.9312	87.9627	86.1795	87.0711	13.6702
300	6	85.5229	85.2728	85.3978	13.4075	61.5622	64.5732	63.0677	9.90163	73.8701	75.9487	74.9094	11.7608	89.8493	86.3215	88.0854	13.8294
300	7	81.6532	77.4669	79.5601	12.4909	54.6132	57.5426	56.0779	8.80423	85.2773	77.0958	81.1866	12.7463	58.7283	61.1519	59.9401	9.41059
300	8	71.1205	66.1956	68.6581	10.7793	58.8087	62.8715	60.8401	9.55189	80.9947	81.1378	81.0662	12.7274	74.0657	71.5093	72.7875	11.4276
300	9	83.2464	83.3319	83.2891	13.0764	67.5989	66.157	66.878	10.4998	71.8968	70.2184	71.0576	11.156	84.9965	85.5069	85.2517	13.3845
300	10	85.5532	78.9326	82.2429	12.9121	61.9423	62.1595	62.0509	9.74199	85.6758	88.8124	87.2441	13.6973	76.2534	77.5059	76.8797	12.0701
300	11	84.4945	77.492	80.9933	12.7159	57.5647	50.5347	54.0497	8.4858	57.1346	55.2966	56.2156	8.82585	77.9422	82.1998	80.071	12.5711
300	12	78.1037	83.4912	80.7975	12.6852	47.6691	43.2871	45.4781	7.14006	69.5808	67.5466	68.5637	10.7645	78.4087	78.8462	78.6275	12.3445
300	13	81.2519	75.0656	78.1588	12.2709	77.8127	73.2946	75.5536	11.8619	84.9993	83.0913	84.0453	13.1951	97.9564	99.1266	98.5415	15.471
300	14	71.9974	71.7767	71.8871	11.2863	68.0603	63.6185	65.8394	10.3368	78.5852	76.3971	77.4912	12.1661	80.8116	84.6729	82.7422	12.9905
300	15	80.4328	76.0627	78.2477	12.2849	61.2717	62.6619	61.9668	9.72879	92.3017	88.4598	90.3807	14.1898	84.0725	87.5497	85.8111	13.4723
300	16	80.2566	74.21	77.2333	12.1256	64.5756	64.4939	64.5348	10.132	85.2381	86.161	85.6996	13.4548	81.5349	77.7955	79.6652	12.5074
300	17	65.0586	68.8079	66.9332	10.5085	56.5638	55.5125	56.0381	8.79799	74.3823	74.0808	74.2315	11.6544	60.4259	68.0881	64.257	10.0883
300	18	96.2782	86.7518	91.515	14.3679	63.6836	68.905	66.2943	10.4082	76.5229	72.6546	74.5888	11.7104	72.943	71.4535	72.1982	11.3351
300	19	80.8779	84.4338	82.6558	12.977	50.6115	58.0539	54.3327	8.53023	73.364	68.8769	71.1204	11.1659	80.3862	82.8582	81.6222	12.8147
300	20	82.8793	83.9232	83.4013	13.094	69.6039	69.3867	69.4953	10.9108	83.7666	84.6525	84.2096	13.2209	78.5155	78.1279	78.3217	12.2965

## Sheet: Regeneration summary
Length (um)
Average	Control	ppr2	EGTA	CaCl2
Pre	12.74	10.5954
0	0	0	0	0
30	5.18738	1.36015	1.49199	5.36088
60	10.3992	4.12734	6.60839	10.6127
90	11.8394	6.3818	9.77731	11.2132
120	12.4137	8.03016	10.5267	12.4468
150	12.3267	8.38114	10.717	12.3319
180	12.4543	8.66734	11.5335	12.4384
240	12.0603	9.38341	11.8003	12.3036
300	12.2837	9.92771	12.1633	12.6911
SD	Control	ppr2	EGTA	CaCl2
Pre	1.18744	2.16771
0	0	0	0	0
30	1.37655	1.57954	1.5807	1.28619
60	1.11046	2.01249	2.16498	1.40663
90	1.77399	1.26132	1.95559	1.85321
120	1.52537	1.60417	2.38412	1.46613
150	1.30766	1.93696	1.28304	1.74901
180	1.253	1.79435	1.7089	1.37164
240	1.03949	1.95938	1.58026	1.39075
300	1.27559	1.16805	1.22764	1.39313

## Sheet: Disassembly data
		fla10				fla10 ppr2				fla10 EGTA				fla10 ppr2 EGTA
Time (min)		Flagellum 1	Flagellum 2	Average (px)	Length (um)	Flagellum 1	Flagellum 2	Average (px)	Length (um)	Flagellum 1	Flagellum 2	Average (px)	Length (um)	Flagellum 1	Flagellum 2	Average (px)	Length (um)
0	1	82.5337	81.2579	81.8958	12.8576	63.1599	67.7422	65.4511	10.2758
0	2	75.7814	73.4702	74.6258	11.7163	50.1343	51.0927	50.6135	7.94632
0	3	52.9388	53.1179	53.0284	8.32545	28.0509	31.5088	29.7798	4.67544
0	4	89.4181	91.8399	90.629	14.2288	46.2528	44.074	45.1634	7.09066
0	5	79.7652	75.0838	77.4245	12.1556	57.2495	52.4665	54.858	8.6127
0	6	70.3043	70.5476	70.4259	11.0569	59.1268	55.9535	57.5401	9.0338
0	7	67.8084	70.3147	69.0615	10.8427	49.7002	55.112	52.4061	8.22776
0	8	68.7675	68.8075	68.7875	10.7996	51.2883	46.5322	48.9103	7.67891
0	9	64.8298	63.3316	64.0807	10.0607	49.8315	46.553	48.1923	7.56619
0	10	76.9794	74.0715	75.5254	11.8575	43.8015	42.7654	43.2834	6.7955
0	11	53.6918	55.866	54.7789	8.60029	61.8767	61.7385	61.8076	9.7038
0	12	68.6807	66.6248	67.6527	10.6215	50.0416	47.383	48.7123	7.64784
0	13	55.3571	51.5804	53.4688	8.39459	35.4785	38.0562	36.7674	5.77248
0	14	59.3172	61.2471	60.2822	9.4643	31.9104	31.6292	31.7698	4.98786
0	15	57.2375	57.6689	57.4532	9.02015	59.2988	58.2674	58.7831	9.22895
0	16	49.2879	52.498	50.893	7.9902	54.1767	53.1884	53.6825	8.42816
0	17	84.7367	81.5141	83.1254	13.0507	62.9297	62.7233	62.8265	9.86377
0	18	65.5691	63.3834	64.4762	10.1228	58.5233	62.7523	60.6378	9.52013
0	19	66.9689	64.6909	65.8299	10.3353	52.0865	54.1145	53.1005	8.33678
0	20	70.7409	70.2618	70.5013	11.0687	33.5532	31.4018	32.4775	5.09897
60	1	63.616	69.5924	66.6042	10.4569	25.7374	27.975	26.8562	4.21642	62.4522	61.1025	61.7773	9.69904	37.1931	34.8061	35.9996	5.65194
60	2	58.945	52.5916	55.7683	8.75563	45.3891	49.5324	47.4608	7.45134	30.9258	32.1413	31.5336	4.95077	50.0196	45.1213	47.5705	7.46856
60	3	46.3668	47.5564	46.9616	7.37297	43.4253	41.244	42.3347	6.64654	40.6266	41.5197	41.0731	6.44848	39.6255	33.4643	36.5449	5.73755
60	4	55.0073	59.7194	57.3633	9.00605	35.1478	38.3836	36.7657	5.77221	47.4128	42.9587	45.1857	7.09416	34.5791	32.1245	33.3518	5.23623
60	5	42.9527	39.9236	41.4381	6.50579	21.8489	22.6732	22.261	3.49498	45.9924	45.2225	45.6074	7.16037	38.675	36.2329	37.4539	5.88027
60	6	48.7123	46.543	47.6277	7.47754	28.7736	32.7697	30.7717	4.83115	44.4165	47.634	46.0253	7.22596	42.1154	44.4222	43.2688	6.7932
60	7	64.3328	64.8651	64.599	10.142	49.7041	46.4881	48.0961	7.55108	35.6775	35.2952	35.4864	5.57136	36.9394	41.7284	39.3339	6.17542
60	8	57.0503	56.3426	56.6965	8.90135	33.1018	33.6265	33.3641	5.23817	47.6371	48.2346	47.9359	7.52593	35.7714	37.9021	36.8368	5.78337
60	9	64.7701	61.4066	63.0884	9.90487	35.2523	37.4178	36.335	5.7046	41.8563	42.2563	42.0563	6.60284	39.832	35.8356	37.8338	5.9399
60	10	72.2693	70.395	71.3322	11.1992	54.4955	54.7073	54.6014	8.57242	38.3776	39.6418	39.0097	6.12452	38.5394	32.6909	35.6151	5.59157
60	11	46.7464	41.3027	44.0245	6.91185	47.6612	45.9805	46.8209	7.35088	44.2018	49.6505	46.9261	7.3674	34.7242	32.7978	33.761	5.30048
60	12	50.1786	53.0241	51.6013	8.10141	31.4048	34.4821	32.9434	5.17212	45.5202	47.7515	46.6359	7.32183	36.6016	38.7163	37.6589	5.91245
60	13	75.0562	76.1387	75.5974	11.8688	40.3389	38.8655	39.6022	6.21755	58.6174	61.5831	60.1002	9.43573	44.8023	45.6238	45.2131	7.09845
60	14	42.4969	45.6141	44.0555	6.91671	23.0454	25.8731	24.4592	3.8401	47.003	44.8515	45.9272	7.21058	41.2286	44.7251	42.9769	6.74737
60	15	46.8216	44.6261	45.7239	7.17865	31.7541	34.5864	33.1702	5.20773	32.4427	30.5941	31.5184	4.94839	26.2053	27.8568	27.0311	4.24388
60	16	69.482	66.004	67.743	10.6357	36.6653	38.2707	37.468	5.88247	57.8552	56.4461	57.1507	8.97265	43.2946	41.1246	42.2096	6.62691
60	17	48.9943	49.8782	49.4363	7.76149	37.7613	37.1239	37.4426	5.87849	45.909	40.891	43.4	6.8138	28.6433	27.5152	28.0792	4.40844
60	18	48.6815	51.9309	50.3062	7.89807	35.4573	33.2418	34.3495	5.39288	48.27	47.8168	48.0434	7.54281	30.572	27.6072	29.0896	4.56707
60	19	63.697	62.954	63.3255	9.94211	45.6918	45.3299	45.5108	7.1452	34.9164	33.5825	34.2494	5.37716	42.7067	44.9094	43.808	6.87786
60	20	42.5239	38.9731	40.7485	6.39751	36.8782	37	36.9391	5.79944	54.162	54.368	54.265	8.51961	38.0351	38.1168	38.0759	5.97792
120	1	40.5524	37.5861	39.0692	6.13387	41.4971	44.1017	42.7994	6.7195	30.1304	30.5067	30.3186	4.76001	25.5439	24.773	25.1584	3.94987
120	2	43.5094	41.0588	42.2841	6.63861	38.9002	43.1109	41.0055	6.43787	26.9114	22.8096	24.8605	3.9031	55.2665	51.5473	53.4069	8.38488
120	3	54.9891	56.7016	55.8453	8.76772	42.2788	43.4474	42.8631	6.72951	40.9242	38.0278	39.476	6.19773	28.2809	30.019	29.15	4.57654
120	4	63.0067	64.6278	63.8173	10.0193	26.4201	28.1824	27.3013	4.2863	17.4642	16.1555	16.8099	2.63915	36.3646	31.3847	33.8747	5.31832
120	5	57.4953	55.6336	56.5644	8.88062	34.5729	35.0834	34.8282	5.46802	22.8473	24.7386	23.793	3.7355	30.8097	29.1599	29.9848	4.70761
120	6	47.4255	52.2393	49.8324	7.82369	32.5257	28.6648	30.5953	4.80346	30.1134	27.5141	28.8137	4.52376	31.6992	31.2214	31.4603	4.93927
120	7	27.2361	21.4009	24.3185	3.81801	37.2631	40.7403	39.0017	6.12327	33.8391	31.5554	32.6973	5.13347	37.4974	41.0035	39.2505	6.16233
120	8	45.2793	51.9758	48.6276	7.63453	25.9422	26.8701	26.4062	4.14577	25.5439	20.0998	22.8218	3.58303	26.9917	29.2354	28.1136	4.41383
120	9	39.4838	39.6047	39.5443	6.20845	32.7569	32.1327	32.4448	5.09384	32.2064	33.4449	32.8256	5.15362	35.2994	40.3227	37.811	5.93633
120	10	44.75	44.8123	44.7811	7.03064	49.7631	50.6011	50.1821	7.87859	43.9674	42.6821	43.3247	6.80198	33	32.1867	32.5934	5.11716
120	11	46.451	43.8363	45.1436	7.08755	34.059	33.5519	33.8055	5.30746	42.7581	45.0324	43.8952	6.89155	17.2631	21.2132	19.2382	3.02039
120	12	60.4924	62.9513	61.7218	9.69033	31.7889	34.8373	33.3131	5.23016	43.9845	43.4714	43.7279	6.86528	24.6982	27.7849	26.2415	4.11992
120	13	60.4699	59.3368	59.9033	9.40482	14.1421	12.8062	13.4742	2.11545	42.1783	41.7648	41.9715	6.58953	30.8786	28.0346	29.4566	4.62468
120	14	53.0624	59.8899	56.4761	8.86675	22.0979	21.5097	21.8038	3.4232	18.5605	22.1655	20.363	3.19699	19.0263	18	18.5131	2.90656
120	15	62.954	60.6543	61.8042	9.70325	27.5427	28.6833	28.113	4.41375	24.1026	22.3512	23.2269	3.64662	29.8411	30.4224	30.1318	4.73069
120	16	55.7725	54.0227	54.8976	8.61892	39.9294	38.56	39.2447	6.16141	36.9667	32.4968	34.7317	5.45288	24.6759	22.4724	23.5741	3.70114
120	17	34.0357	36.0251	35.0304	5.49977	26.4197	29.1568	27.7882	4.36275	52.9499	53.2636	53.1068	8.33776	27.2976	26.6333	26.9655	4.23358
120	18	47.7863	49.8762	48.8313	7.66651	31.8948	36.3912	34.143	5.36046	25.632	24.5967	25.1144	3.94296	36.3776	31.419	33.8983	5.32203
120	19	38.2733	40.8055	39.5394	6.20768	20.8102	21	20.9051	3.2821	18.2483	20	19.1241	3.00249	29.7334	27.4591	28.5962	4.48961
120	20	51.9897	55.6022	53.796	8.44596	29.265	33.1548	31.2099	4.89995	39.474	39.6665	39.5702	6.21253	26	21.4709	23.7355	3.72647
180	1	60.0951	65.2938	62.6945	9.84303	28.1411	28.2148	28.178	4.42394	20.4127	21.026	20.7194	3.25294	15.2971	15.5242	15.4106	2.41947
180	2	53.8648	56.3342	55.0995	8.65063	42.6564	42.9362	42.7963	6.71902	37.7882	34.6675	36.2279	5.68777	29.2066	29.5489	29.3777	4.6123
180	3	40.714	46.1766	43.4453	6.82091	36.6258	32.6525	34.6391	5.43835	17.0711	17.0489	17.06	2.67842	20.2237	20.6155	20.4196	3.20588
180	4	38.8995	43.0148	40.9572	6.43028	19.4415	19.9896	19.7156	3.09535	23.9284	26.6725	25.3004	3.97217	15.0333	13.3417	14.1875	2.22743
180	5	45.4795	47.8067	46.6431	7.32297	30.2627	31.6299	30.9463	4.85857	33.6261	36.8205	35.2233	5.53006	31.623	29.071	30.347	4.76448
180	6	45.1172	46.2781	45.6977	7.17453	24.2801	25.373	24.8266	3.89777	27.9259	29.6952	28.8106	4.52326	23.8544	21.4524	22.6534	3.55658
180	7	30.6458	31.9561	31.301	4.91425	38.2753	42.5441	40.4097	6.34432	27.4606	24.5602	26.0104	4.08364	24.1645	27.3848	25.7746	4.04662
180	8	17.2047	13.6015	15.4031	2.41828	23.7496	22.4743	23.1119	3.62858	26.2794	24	25.1397	3.94693	19	18.2483	18.6241	2.92399
180	9	44.5769	49.2545	46.9157	7.36576	24.8428	27.3144	26.0786	4.09434	21.4238	18.8885	20.1562	3.16452	31.6815	30.0832	30.8824	4.84853
180	10	44.3476	43.4301	43.8889	6.89055	35.7411	33.7648	34.753	5.45622	35.6953	37.3345	36.5149	5.73284	24.3311	23.0868	23.7089	3.7223
180	11	31.7393	34.738	33.2386	5.21847	16.6433	12	14.3217	2.2485	26.6301	24.9588	25.7945	4.04973	16.5529	15.2643	15.9086	2.49766
180	12	44.4308	46.3	45.3654	7.12237	19.0623	18	18.5311	2.90939	31.9878	28.8485	30.4181	4.77564	8.48528	11.7047	10.095	1.58491
180	13	24.2074	26.2488	25.2281	3.96082	31.8311	29.3961	30.6136	4.80633	29.4853	31.7428	30.614	4.8064	20.6155	21.2132	20.9144	3.28356
180	14	42.8024	38.1313	40.4668	6.35329	30.963	28.5948	29.7789	4.67528	19.605	17.6333	18.6191	2.9232	20.6155	20.2485	20.432	3.20782
180	15	43.2354	42.0977	42.6666	6.69865	46.0253	44.7111	45.3682	7.12281	17.4642	15.7315	16.5979	2.60587	11.0384	9.84886	10.4436	1.63965
180	16	40.5796	45.436	43.0078	6.75223	33.8078	28	30.9039	4.85191	31.8979	30.3333	31.1156	4.88515	11.1803	12.9284	12.0544	1.89254
180	17	29.4165	33.7414	31.5789	4.95789	23.2788	26.0841	24.6815	3.87499	28.0026	26.6732	27.3379	4.29205	23.544	18.2483	20.8961	3.28069
180	18	38.7648	41.7204	40.2426	6.31809	33.3441	28.1334	30.7387	4.82598	17.3333	18.1841	17.7587	2.78812	27.4177	28.0706	27.7442	4.35583
180	19	23.5372	22.8035	23.1704	3.63775	22.2066	24.5219	23.3642	3.66818	22.3663	25.7258	24.0461	3.77523	15.1327	15	15.0664	2.36542
180	20	39.0513	36.4488	37.75	5.92676	14.7648	14.3178	14.5413	2.28299	18.2921	17.8429	18.0675	2.8366	24.0147	22.615	23.3149	3.66044
240	1	32.6917	34.3469	33.5193	5.26253	28.8114	29.4924	29.1519	4.57685	38.4539	39.2289	38.8414	6.0981	13.6015	12.3693	12.9854	2.03871
240	2	37.7578	38.7836	38.2707	6.0085	23.6686	24.2195	23.944	3.75922	24.6015	25.7723	25.1869	3.95434	12.1655	12.7279	12.4467	1.95414
240	3	30.1229	29.6327	29.8778	4.69081	14.9269	14.0499	14.4884	2.27468	24.7588	26.3059	25.5324	4.00858	28.9259	28.8567	28.8913	4.53594
240	4	44.7987	42.5793	43.689	6.85918	25.434	28.0312	26.7326	4.19702	29.6149	28.6356	29.1253	4.57267	19.6469	17.6918	18.6693	2.93109
240	5	29.8031	27.0414	28.4223	4.46229	13.4536	14.3178	13.8857	2.18006	36.0621	34.731	35.3965	5.55726	20.117	23.4613	21.7892	3.4209
240	6	24.6192	23.0355	23.8273	3.74089	23.0217	25.02	24.0209	3.77128	35.8303	36.2603	36.0453	5.65911	9.3244	10.4492	9.8868	1.55223
240	7	29.8746	32.0173	30.9459	4.85851	31.5644	32.5759	32.0701	5.03501	33.2942	34.1198	33.707	5.29199	16.1245	12.6619	14.3932	2.25973
240	8	14.8661	14.0333	14.4497	2.2686	17.1172	18.0278	17.5725	2.75888	28.7924	26.6833	27.7378	4.35484	19.8195	18.6143	19.2169	3.01705
240	9	24.8395	30.3645	27.602	4.33351	21.2066	20.2956	20.7511	3.25792	21.2132	17.2788	19.246	3.02162	22.4845	22.4391	22.4618	3.5265
240	10	26.4822	23.7697	25.126	3.94478	18.3576	23.0217	20.6896	3.24827	21.9545	18.3848	20.1696	3.16663	18.5529	21.3776	19.9653	3.13454
240	11	16.6441	17.449	17.0465	2.67631	13.8924	12	12.9462	2.03256	24.5529	25.0384	24.7957	3.89292	21.4883	18.9363	20.2123	3.17333
240	12	32.0145	32.4895	32.252	5.06357	14.1327	15.1848	14.6588	2.30143	19.7243	21.4709	20.5976	3.23383	17.3381	15.8445	16.5913	2.60484
240	13	36.7475	37.814	37.2807	5.85308	27.1529	29.5249	28.3389	4.44921	32.2104	34.1321	33.1713	5.20789	9.66666	8.07071	8.86869	1.39238
240	14	26.73	26.0675	26.3988	4.1446	23.8885	24.42	24.1543	3.79222	24.6983	21.0147	22.8565	3.58847	12.7158	11.7941	12.255	1.92403
240	15	34.444	35.2441	34.844	5.47051	21.2552	22.7047	21.98	3.45085	18.7883	18.9737	18.881	2.96431	0	0	0	0
240	16	37.1623	38.5017	37.832	5.93962	16.6667	17.5008	17.0837	2.68215	23.0887	21.1512	22.1199	3.47283	0	0	0	0
240	17	32.7173	32.2986	32.5079	5.10375	20.7635	21.9592	21.3613	3.35373	20.076	18.4259	19.2509	3.0224	0	0	0	0
240	18	29.5298	27.1472	28.3385	4.44914	17.3333	19.2589	18.2961	2.87249	0	0	0	0	0	0	0	0
240	19	30.6323	29.4953	30.0638	4.72002	18.2195	19.3471	18.7833	2.94898	0	0	0	0	0	0	0	0
240	20	19.881	18.2535	19.0672	2.99356	11.6667	12.5093	12.088	1.89781	0	0	0	0	0	0	0	0
300	1	24.4403	22.6058	23.5231	3.69312	12.7279	13.0384	12.8832	2.02266	17.2047	12.8062	15.0054	2.35586	0	0	0	0
300	2	18.0278	15.6525	16.8401	2.6439	22.885	25.6829	24.284	3.81258	28.4289	31.4009	29.9149	4.69664	0	0	0	0
300	3	17.105	16.0278	16.5664	2.60092	14.8661	11.7047	13.2854	2.08581	22.3607	24.5967	23.4787	3.68616	0	0	0	0
300	4	45.6343	47.6826	46.6584	7.32538	29.2081	31.4442	30.3261	4.7612	13	11.4018	12.2009	1.91554	0	0	0	0
300	5	22.4131	23.2389	22.826	3.58368	25.3142	27.1241	26.2191	4.11641	21.095	22.0227	21.5589	3.38474	0	0	0	0
300	6	33.6193	30.0454	31.8323	4.99768	22.1655	23.4433	22.8044	3.5803	16.4012	16.0312	16.2162	2.54595	0	0	0	0
300	7	23.2843	24.7588	24.0216	3.77138	24.0832	22.561	23.3221	3.66157	19.3132	20	19.6566	3.08609	0	0	0	0
300	8	31.2933	30.3541	30.8237	4.83932	17	16.0312	16.5156	2.59295	19.5744	17.8167	18.6955	2.9352	0	0	0	0
300	9	16.2788	17.0357	16.6572	2.61519	14.7648	11.7047	13.2348	2.07786	32.3315	30.4138	31.3727	4.92551	0	0	0	0
300	10	36.8722	37.9502	37.4112	5.87356	18.942	20.4571	19.6996	3.09283	22.4589	25.6469	24.0529	3.7763	0	0	0	0
300	11	19.4684	20.8944	20.1814	3.16848	0	0	0	0	23.6335	25.5734	24.6034	3.86274	0	0	0	0
300	12	23.2036	24.2084	23.706	3.72184	0	0	0	0	0	0	0	0	0	0	0	0
300	13	35.2139	36.2022	35.708	5.60616	0	0	0	0	0	0	0	0	0	0	0	0
300	14	17.5605	16.5872	17.0738	2.68059	0	0	0	0	0	0	0	0	0	0	0	0
300	15	16.4217	17.356	16.8889	2.65155	0	0	0	0	0	0	0	0	0	0	0	0
300	16	0	0	0	0	0	0	0	0	0	0	0	0	0	0	0	0
300	17	0	0	0	0	0	0	0	0	0	0	0	0	0	0	0	0
300	18	0	0	0	0	0	0	0	0	0	0	0	0	0	0	0	0
300	19	0	0	0	0	0	0	0	0	0	0	0	0	0	0	0	0
300	20	0	0	0	0	0	0	0	0	0	0	0	0	0	0	0	0

## Sheet: Disassembly summary
Length (um)
Average	fla10	fla10 ppr2	fla10 EGTA	fla10 ppr2 EGTA
0	10.6285	7.82459
60	8.66672	5.86829	7.09567	5.90094
120	7.70735	5.11214	5.0285	4.71906
180	6.23888	4.46114	4.01553	3.20481
240	4.64219	3.24203	3.55339	1.87327
300	2.98864	1.59021	1.85854	0
SD	fla10	fla10 ppr2	fla10 EGTA	fla10 ppr2 EGTA
0	1.70527	1.66629
60	1.6584	1.30469	1.34792	0.880252
120	1.62773	1.3565	1.58885	1.20277
180	1.70585	1.3439	1.01498	1.01077
240	1.15567	0.896187	1.80497	1.45161
300	2.16129	1.75991	1.8539	0
