# Supplementary material for: Testing the ion-current model for flagellar length sensing and IFT regulation
Source: eLife. 2023 Jan 13;12:e82901. doi: 10.7554/eLife.82901 (PMC9891718; doi:10.7554/eLife.82901)
Supplement: Figure 6—source data 1. [file elife-82901-fig6-data1.xlsx]

## Sheet: Sheet1
Control	Anterograde							Retrograde							Calcium
Name	Numbers of IFT trajectories	IFT intensity	Average IFT intensity	Mean IFT speed	Median IFT speed	IFT frequency	Unit intensity	Numbers of IFT trajectories	IFT intensity	Average IFT intensity	Mean IFT speed	Median IFT speed	IFT frequency	Unit intensity	Unit intensity	Total intensity	Peak intensity	Mean Peak intensity	Name	Length (px)	Length (um)
210916-01A	40	5155.94	316.155	1.08239	1.03826	0.6279	7279.94	29	4863.84	301.138	-1.30053	-1.32632	0.4508	5096.86	416.722	5000.66	319.397	9919.16	210916-01A	24.555	2.57009
210916-02A	56	8895.28	234.175	1.12908	1.14966	0.6601	5251.1	69	7198.72	221.441	-1.74978	-1.77648	0.8855	5262.13	426.144	17898	4723.04	19557.1	210916-02A	48.055	5.02976
210916-02B	55	7093.02	258.106	1.10711	1.10469	0.6118	6617.27	52	6118.09	250.151	-1.32224	-1.30695	0.7728	5516.82	403.817	10499.2	5205.75	8508.91	210916-02B	45.086	4.719
210916-03A	65	6889.5	206.507	1.63286	1.64197	0.7889	5251.57	60	5915.71	185.181	-2.61714	-2.6246	0.8211	4234.42	584.406	21623	1091.67	33902.6	210916-03A	54.291	5.68246
210916-03B	62	7565.24	207.305	1.5774	1.62548	0.7406	4767.26	62	6357.98	172.974	-2.93041	-2.97509	0.5957	4076.09	382.104	16430.5	10487.1	14475	210916-03B	58.391	6.11159
210916-04A	69	8122.29	218.674	1.92332	1.95708	0.8211	5520.73	75	7003.34	207.755	-2.13927	-2.13688	0.8855	5111.04	468.049	20870.4	5534.43	26442.5	210916-04A	74.011	7.74648
210916-04B	68	8269.96	205.071	1.90617	1.90854	0.7567	4801.95	70	7508.64	194.211	-2.01253	-1.98016	0.7728	4511.98	431.167	22123.9	4982.96	30950	210916-04B	71.346	7.46755
210916-05A	58	7631.02	178.023	1.41304	1.41	0.6601	3754.3	43	8843.22	175.935	-1.25434	-1.23094	0.3059	3313.32	261.521	13619.6	4090.33	50811.5	210916-05A	82.009	8.58361
210916-05B	74	7405.78	146.997	2.44019	2.46508	0.8211	3649.57	92	6546.09	139.882	-3.19119	-3.24829	1.0948	4043.23	453.202	29911.3	15841.2	25892.8	210916-05B	82.961	8.68325
210916-31B	50	5230.9	296.178	1.32337	1.27616	0.7245	6547.39	31	5818.74	274.655	-2.11189	-2.15806	0.4186	4498.49	210.101	3571.72	227.425	7062.9	210916-31B	48.831	5.11098
210916-32B	74	5149.45	155.763	1.73107	1.75744	1.0787	4388.04	68	4721.44	146.925	-2.47989	-2.48013	0.805	3747.93	427.763	16255	3390.52	35098.5	210916-32B	49.786	5.21093
210916-32C	70	5617.6	179.037	1.99379	2.01976	0.966	4883.18	79	4628.05	165.446	-2.54113	-2.57805	1.0304	4625.24	594.431	20805.1	6830.83	42427.5	210916-32C	46.577	4.87506
210916-32D	55	3245.47	220.75	1.77656	1.73221	0.8372	5510.19	58	3164.95	193.633	-1.99813	-1.9074	0.9016	5721.75	399.6	5594.4	265.633	8249.48	210916-32D	26.201	2.74237
210916-33A	53	5897.73	293.174	1.58087	1.59945	0.7406	7466.79	44	7404.99	268.257	-1.4636	-1.36458	0.6762	7555.43	418.536	7533.65	1426.22	14764.2	210916-33A	47.643	4.98663
210916-33B	65	7223.84	256.272	1.34259	1.32335	0.8855	7004.48	55	6868.63	232.845	-1.78936	-1.73094	0.7245	5692.29	347.372	10073.8	807.908	16726.9	210916-33B	46.461	4.86292
210916-35A	88	6863.93	149.5	2.61765	2.61886	1.0304	4593.69	90	6459.76	140.97	-3.20635	-3.23639	1.0626	4361.5	146.69	8356.63	0	0	210916-35A	106.494	11.1464
210916-35B	98	8998.24	154.7	2.44223	2.4446	1.0143	4693.09	118	7721.77	145.655	-3.06274	-3.03577	1.0465	4832.53	154.785	12692.3	0	0	210916-35B	104.045	10.89
210916-36A	87	11433.7	187.705	2.45951	2.48558	0.8372	5482.79	89	8219.69	177.035	-2.70548	-2.68297	0.7567	4086.99	188.399	14712.1	5620.6	15868.4	210916-36A	102.408	10.7187
210916-36B	90	10679.2	178.289	2.42153	2.45075	0.8211	4889.93	95	8562.89	171.429	-2.44877	-2.39449	0.7245	4121.15	228.302	19664	5413.42	19778.7	210916-36B	103.798	10.8642
210916-37A	103	10310.3	180.531	2.38441	2.40247	0.9177	5431.65	104	8972.09	169.119	-2.82953	-2.79579	1.0626	4808.51	409.313	34382.3	0	0	210916-37A	102.445	10.7226
210916-37B	102	9365.82	181.72	2.08866	2.08982	0.8533	5262.59	111	8064.13	170.09	-2.68673	-2.71383	1.0626	4949.28	199.51	15589.9	0	0	210916-37B	101.749	10.6497
210916-39A	88	7839.57	175.148	1.7479	1.69579	0.7889	4498.24	90	7165.93	168.537	-1.87908	-1.89616	0.7406	4206.89	245.818	16427.3	825.495	25636.5	210916-39A	88.332	9.24542
210916-40A	86	8041.71	171.043	2.31086	2.32696	0.9338	5089.76	86	7045.77	166.82	-2.17961	-2.17167	0.8533	4457.25	216.247	12758.6	1407.63	17486.1	210916-40A	78.267	8.19195
210930-03A	65	8210.85	275.375	2.00963	2.02061	0.8372	7180.83	81	6937.29	246.851	-2.47278	-2.42868	1.2075	7512.59	279.01	8958.64	1619.59	20119.2	210930-03A	55.101	5.76724
210930-03B	66	7970.33	244.867	1.95047	1.93029	0.8533	6262.67	80	6579.51	215.703	-2.49978	-2.46304	1.0948	6342.78	542.788	19540.4	6446.08	26691.9	210930-03B	54.339	5.68748
210930-05A	54	5676.87	225.359	1.66607	1.65518	0.805	5310.15	48	5480.1	201.427	-2.14723	-2.07606	0.7245	4639.03	115.68	2885.72	1578.52	4456.57	210930-05A	59.69	6.24755
210930-05B	61	5220.33	185.125	1.4905	1.48914	0.7728	4341.06	66	5466.8	172.307	-2.53774	-2.50192	0.8694	4729.36	147.314	4714.04	1504.24	4917.41	210930-05B	55.364	5.79477
210930-06A	47	5547.11	279.491	1.13096	1.12008	0.6762	6390.85	50	5609.97	265.237	-1.16136	-1.14455	0.7406	6788.05	129.055	2322.99	0	0	210930-06A	31.066	3.25157
210930-06B	36	3066	188.722	0.645689	0.604309	0.5313	4390.57	20	3130.52	189.377	-0.921135	-0.956737	0.3059	2515.49	103.924	1143.16	0	0	210930-06B	32.647	3.41705
210930-07A	44	6050.44	229.142	1.20716	1.07753	0.6762	5396.42	44	6020.85	216.154	-1.79808	-1.67767	0.6601	5502.21	103.066	2164.38	0	0	210930-07A	49.652	5.19691
210930-07B	51	5588.65	178.728	1.83407	1.83102	0.644	3885.88	63	4928.23	163.132	-2.65101	-2.64741	0.9499	4246.96	196.96	6302.73	0	0	210930-07B	47.292	4.9499
210930-08A	59	5002.21	253.729	1.93144	1.91363	0.805	5472.34	56	4098.77	229.26	-2.77092	-2.73384	0.9016	4353.17	339.797	7815.34	4083.45	7685.77	210930-08A	53.201	5.56837
210930-08B	50	5870.48	242.979	1.63603	1.54645	0.7406	6515.44	33	6875.64	214.489	-1.99805	-1.94838	0.5152	5208.93	297.81	5658.39	3848.33	6128.89	210930-08B	47.136	4.93357
210930-09A	38	9078.48	235.285	0.776529	0.757425	0.4347	5294.64	43	7460.82	216.069	-1.50335	-1.44021	0.6279	4956.33	153.022	4284.63	2310.68	6240.01	210930-09A	46.703	4.88825
210930-09B	28	7359.48	177.004	0.754919	0.699633	0.2737	3798.36	38	5721.66	168.971	-1.19647	-1.1368	0.5474	4010.15	88.591	2126.19	0	0	210930-09B	45.692	4.78243
210930-09C	65	9029.04	225.122	1.26265	1.26606	0.5957	5325.56	85	7171.65	203.734	-1.96382	-1.93692	0.9338	5545.88	303.135	14550.5	9334.33	15669.5	210930-09C	67.873	7.10404
210930-09D	52	8627.62	222.704	0.977633	0.968908	0.5635	4446.33	71	7721.16	202.317	-1.64831	-1.64977	0.7406	5253.88	131.303	5908.64	0	0	210930-09D	68.029	7.12037
210930-10A	22	12629.9	404.354	0.491783	0.454604	0.3059	10846.7	18	15446.5	391.113	-0.316844	-0.252771	0.2415	10675.4	139.129	1530.42	0	0	210930-10A	21.915	2.29377
210930-10B	15	20407.9	450.751	0.215106	0.212327	0.161	15686.5	8	35001.3	451.714	-0.0920307	-0.0758312	0.0644	14821.6	147.991	1183.92	0	0	210930-10B	18.344	1.92001
210930-11A	67	3838.73	168.453	2.28041	2.23394	0.7889	4310.07	70	3279.25	155.744	-3.12917	-3.10703	1.1109	3890.63	146.856	3818.25	1195.53	6188.06	210930-11A	64.905	6.79339
210930-11B	78	6474.24	180.715	1.98333	2.02856	0.6762	4918.63	77	6691.54	165.538	-2.95734	-2.88979	1.0143	5027.75	343.272	15104	7289.09	14604.5	210930-11B	61.64	6.45165
210930-12A	64	4913.82	177.696	2.0003	1.99399	0.8533	4300.76	67	4225.83	170.611	-2.55868	-2.48734	1.0304	3931.98	324.823	10394.3	273.298	16975	210930-12A	57.416	6.00954
210930-12B	71	6591.76	208.297	1.9376	1.96242	0.9821	5803.65	63	5602	196.518	-2.53244	-2.5548	0.8533	4436.62	160.992	5677.43	2253.65	6998.9	210930-12B	61.273	6.41324
210930-13A	50	5961.38	257.834	1.38088	1.34373	0.7084	6239.18	46	5319.15	252.58	-1.56811	-1.52304	0.7245	5237	178.547	3749.49	0	0	210930-13A	35.746	3.74141
210930-13B	58	6916.11	262.771	1.32233	1.29554	0.644	7240.19	44	6546.5	251.518	-1.40592	-1.37932	0.6601	5349.44	328.138	7875.32	260.185	16160.5	210930-13B	38.835	4.06473
210930-20A	59	9687.95	177.521	1.56711	1.56104	0.5635	3819.48	55	9434.75	166.248	-1.47905	-1.44907	0.3059	3542.56	253.883	16577	3599.45	15969.2	210930-20A	90.58	9.48071
210930-20B	63	8319.32	181.376	1.65008	1.64996	0.6118	3984.2	60	8519.89	176.408	-1.65281	-1.66323	0.5796	3907.7	206.88	11960.2	4053.22	11443.3	210930-20B	90.712	9.49452
210930-21A	69	9477.41	177.303	1.63889	1.67183	0.6762	3667.34	76	8753.46	167.355	-2.27154	-2.29633	0.5957	3725.9	203.349	15886.5	2130.05	26460.2	210930-21A	100.881	10.5589
210930-21B	72	8528.15	204.188	1.59211	1.58859	0.6923	4878.83	60	8903.46	193.424	-1.73094	-1.60285	0.5474	4264.72	212.914	11710.3	3288.54	12015.1	210930-21B	100.325	10.5007
210930-31A	62	6374.72	259.932	2.29158	2.24271	0.8533	6494.78	55	6825.47	236.746	-2.84978	-2.76041	0.805	6157.3	369.796	9688.66	3432.06	7895.23	210930-31A	77.817	8.14485
210930-31B	66	6365.27	221.613	2.15216	2.14919	0.966	6028.99	52	6259.17	203.435	-3.45718	-3.47852	0.7245	4754.49	650.86	19525.8	6928.95	20493.8	210930-31B	76.618	8.01935
210930-32A	81	8776.13	180.282	1.63646	1.67162	0.5957	4190.11	82	7252.57	169.074	-2.0784	-2.05412	0.6601	3496.03	176.794	13259.6	0	0	210930-32A	93.509	9.78728
210930-33A	87	9473.46	178.087	1.81314	1.85491	0.8694	4599.14	76	9205.57	168.419	-2.68873	-2.72959	0.5635	3875.52	242.313	19142.7	5735.41	25445.5	210930-33A	98.582	10.3182
210930-34A	60	8930.77	191.979	1.53174	1.5332	0.644	4165.81	53	8890.29	176.122	-1.30546	-1.29271	0.3542	3746.24	227.339	12731	4418.11	15245.4	210930-34A	74.795	7.82854
210930-35A	93	11307.3	198.563	2.74666	2.78093	1.0787	6393.74	95	9470.88	188.149	-3.61353	-3.70748	0.9177	5573.35	317.173	22023.4	9085.37	31350.5	210930-35A	91.936	9.62263
211012-01A	52	8810.06	193.47	0.804443	0.799469	0.4186	4013.25	65	7656.24	181.619	-1.59632	-1.57956	0.5957	4304.03	219.193	11178.8	2473.4	30725.4	211012-01A	65.817	6.88885
211012-01B	59	8709.73	193.303	0.950959	0.943963	0.4508	4304.78	71	7363.64	179.697	-1.79551	-1.78435	0.7406	4370.39	237.136	12568.2	6718.88	23184.6	211012-01B	67.659	7.08164
211012-03A	51	6114.93	217.096	1.09273	1.11616	0.5957	4733.33	59	4980.58	196.276	-1.70021	-1.69371	0.8533	4513.77	259.723	7531.98	0	0	211012-03A	42.039	4.40008
211012-03B	43	7746.07	216.59	0.895825	0.911822	0.4669	4332.7	60	6116.17	194.779	-1.45501	-1.45891	0.8211	4724.13	184.941	6287.99	0	0	211012-03B	43.236	4.52537
211012-04A	47	8529.69	230.723	0.837432	0.800441	0.5474	6433.5	45	8910.72	221.929	-1.71675	-1.64264	0.644	6395.88	277.355	7488.6	0	0	211012-04A	42.126	4.40919
211012-04B	47	6947.57	243.833	1.12805	1.10323	0.5796	5326.92	41	7525.13	229.747	-0.998053	-0.946144	0.5796	5027.91	284.627	7684.94	1864.64	12868.5	211012-04B	42.594	4.45817
211012-05A	50	5053.14	193.256	1.6408	1.63458	0.6762	4445.18	64	4513.49	181.227	-2.33474	-2.2594	0.9821	5014.54	276.801	6920.04	2506.56	11975.9	211012-05A	39.265	4.10974
211012-05B	48	6537.46	204.914	1.14905	1.1796	0.5957	4636.88	61	5753.22	193.186	-2.01405	-2.00186	0.8533	5082.83	122.745	3682.36	0	0	211012-05B	39.977	4.18426
211012-06A	32	3264.92	199.491	0.793851	0.785169	0.4991	4061.09	25	3007.6	185.131	-1.59274	-1.59583	0.3703	2971.23	143.573	1579.3	0	0	211012-06A	37.914	3.96833
211012-06B	18	3933.37	233.01	0.508286	0.396008	0.2415	3691.3	10	6201.38	200.203	-0.412836	-0.428025	0.1449	3381.55	140.827	1126.61	0	0	211012-06B	35.299	3.69463
211012-06C	43	5766.43	197.993	0.896846	0.852171	0.4991	4754.2	51	4621.92	188.277	-1.46381	-1.4104	0.7567	4492.81	177.176	4075.06	348.756	21661.8	211012-06C	35.785	3.7455
211012-06D	35	4855.38	232.831	0.630542	0.574151	0.4669	5306.26	32	5146.16	216.72	-1.19138	-1.07902	0.5152	5164.94	184.275	2579.85	0	0	211012-06D	36.597	3.83049
211012-07A	71	5764.3	186.95	1.66549	1.67405	0.9982	5361.9	79	4891.13	173.505	-2.61804	-2.63575	1.127	5131.31	253.467	8364.42	1252.32	12963.9	211012-07A	52.217	5.46538
211012-07B	51	5061.5	190.098	1.22785	1.21148	0.644	4356.45	46	5021.7	178.19	-1.89494	-1.85823	0.6601	3943.86	315.341	8198.86	5886.84	8705.77	211012-07B	52.51	5.49605
211012-09A	43	7247.7	270.381	0.785663	0.748123	0.4991	6805.78	40	6295.95	254.119	-1.02254	-0.958001	0.5957	5591.97	277.573	5551.45	3176.12	4026.01	211012-09A	35.873	3.75471
211012-09B	37	7261.06	278.023	0.515062	0.476849	0.3542	7345.03	25	8421.44	266.758	-0.574651	-0.529134	0.3381	5780.95	248.216	3971.45	179.241	11133	211012-09B	28.434	2.97609
211012-10A	27	9694.17	279.138	0.595026	0.566394	0.3703	7203.88	31	7727.35	268.318	-0.634208	-0.637596	0.4186	6726.6	287.779	4604.47	0	0	211012-10A	26.549	2.7788
211012-10B	30	9085.68	311.329	0.483091	0.467907	0.3059	8423.64	21	11447.5	305.214	-0.515521	-0.486283	0.3059	7531.4	272.364	3813.1	0	0	211012-10B	25.108	2.62797
211012-11A	87	9758.68	167.092	1.69847	1.75806	0.805	4681.97	113	7059.2	153.82	-2.88128	-2.95548	0.966	4431.45	519.211	41536.9	24793.2	30799	211012-11A	92.291	9.65979
211012-11B	81	8046.23	159.952	1.85599	1.8678	0.966	4044.57	92	7474.7	149.537	-3.48794	-3.56105	0.9338	4256.16	316.809	22493.5	13236.5	18269.9	211012-11B	93.974	9.83595
211012-12A	63	7691.38	152.082	2.10673	2.10682	0.7406	3397.17	94	7026.51	140.304	-3.48897	-3.59339	1.1109	4546.99	142.942	9005.37	0	0	211012-12A	83.744	8.76521
211012-12B	80	8521.29	155.848	2.09834	2.13475	0.805	4183.37	109	7177.71	146.428	-3.38534	-3.51135	1.2719	4813.66	215.561	15304.8	902.668	14016.6	211012-12B	83.029	8.69037
211012-13A	55	2299.65	168.715	1.68158	1.59276	0.8855	4276.02	48	2156.75	163.556	-2.26448	-2.20279	0.7728	3542.13	145.422	1890.49	0	0	211012-13A	33.801	3.53784
211012-13B	64	3849.71	262.428	1.83606	1.82074	1.0304	7096.23	46	3658.23	243.698	-2.15163	-2.06686	0.7406	4920.07	188.252	2823.79	1990.12	3090.24	211012-13B	34.822	3.6447
211012-14A	50	6246.87	190.498	1.22507	1.22416	0.644	4590.22	50	5938.3	183.483	-1.55328	-1.47601	0.644	4341.82	269.844	8095.33	1662.43	11472.9	211012-14A	38.009	3.97828
211012-14B	59	4911.15	181.043	1.26426	1.26014	0.6923	4577.99	54	4774.68	177.182	-1.92318	-1.86301	0.8533	4115.5	168.611	4721.1	410.619	12752.1	211012-14B	38.964	4.07823
211012-15A	90	10179.7	166.939	2.13172	2.16409	0.805	4817.33	108	9026.13	157.524	-3.37898	-3.45906	1.1431	5093.64	135.323	11231.8	2280.96	23612.4	211012-15A	97.271	10.181
211012-15B	89	9871.94	161.008	2.3551	2.37084	1.0465	5003.25	116	7729.87	151.404	-3.31085	-3.38045	1.1431	5096.32	469.66	36163.8	11885.9	35155	211012-15B	95.485	9.9941
211012-16A	64	3565.29	169.034	2.16278	2.046	0.9982	4450.19	58	3088.96	152.936	-2.38283	-2.296	0.9338	3618.18	149.359	3285.91	0	0	211012-16A	44.326	4.63945
211012-16B	55	4763.27	160.199	1.72712	1.7455	0.7728	3924.5	50	4918.64	154.57	-1.86029	-1.76805	0.6762	3696.52	186.218	5400.32	447.639	9267.88	211012-16B	47.638	4.98611
211012-17A	98	9639.23	174.516	2.48031	2.50518	1.0304	5726.12	106	8057.36	167.621	-3.63951	-3.7387	1.2719	5226.95	331.058	23505.1	4665.69	41399.2	211012-17A	97.725	10.2286
211012-17B	96	9702.69	172.957	2.41604	2.40729	1.0465	5340.5	108	8453.98	163.275	-3.58981	-3.6413	1.0465	5192.7	318.216	23866.2	2306.87	35820.9	211012-17B	93.09	9.74342
211012-26A	83	9902.98	182.87	2.00684	2.03232	0.805	5031.55	100	8070.94	174.028	-2.6325	-2.63901	1.0304	4913.85	234.575	16654.8	1054.33	21828.9	211012-26A	88.616	9.27514
211012-26B	75	6882.97	177.135	1.9724	2.00913	0.8533	4552.9	59	7504.06	172.349	-2.64536	-2.63796	0.7406	3914.27	118.025	5783.23	1437.64	7441.19	211012-26B	91.243	9.5501
211012-27A	94	9024.64	165.853	2.32895	2.30739	0.966	4738.3	102	7916.78	156.616	-3.14606	-3.21589	1.1753	4528.94	277.346	21633	4728.32	29368.4	211012-27A	112.682	11.794
211012-27B	97	7352.03	169.211	2.46597	2.45726	1.0626	5448.08	96	6643.7	156.997	-3.79733	-3.83299	1.288	4941.28	749.105	42699	31596	35681.5	211012-27B	107.211	11.2214
211012-28A	98	9824.56	168.674	2.61819	2.60173	1.0143	5257.23	98	8229.83	158.995	-3.43339	-3.45746	0.9177	4436.81	321.868	25427.6	9098.16	47091.9	211012-28A	109.265	11.4364
211012-28B	77	5826.65	175.918	2.41898	2.45056	1.0948	5234.83	77	4989.49	167.203	-3.33232	-3.33986	0.9499	4507.34	201.598	7459.12	1990.86	17665.1	211012-28B	110.254	11.5399
211012-29A	76	4415.12	142.078	2.35948	2.347	0.9016	3879.81	68	4698.84	135.187	-2.98156	-2.96993	0.966	3588.55	109.911	4176.6	509.021	15808.1	211012-29A	95.442	9.9896
211012-30A	91	7062.26	162.765	2.24489	2.24975	0.8372	4121.5	88	5885.43	162.662	-2.58162	-2.59848	0.5796	3364.02	434.688	29327.2	21322.5	33109.5	211012-30A	87.235	9.1306
211012-30B	67	4869.85	153.791	2.17486	2.16966	0.8694	3826.36	61	4978.05	151.234	-2.84739	-2.77495	0.7889	3502.57	203.449	7731.07	4421.15	8581.43	211012-30B	89.279	9.34454
211012-31A	97	6836.68	147.222	2.11485	2.12936	0.8694	4385.21	98	6482.12	141.509	-3.26436	-3.29023	1.1109	4234.5	500.299	33019.7	23107.6	24745.8	211012-31A	109.728	11.4849
211012-31B	62	7996.5	181.997	1.44417	1.41678	0.483	3850.18	65	8283.48	165.767	-1.3723	-1.29069	0.6762	4129.11	232.338	13243.3	0	0	211012-31B	111.313	11.6508
211012-41A	71	7081.42	154.022	2.03873	2.03332	0.6601	3452.59	82	7440.73	145.956	-2.29964	-2.32118	0.7889	4095.4	122.143	7817.15	0	0	211012-41A	91.881	9.61688
211012-41B	48	4952.91	160.848	1.5664	1.5498	0.5152	3011.85	46	5054.74	152.366	-1.43991	-1.34518	0.5152	2927.64	120.209	4207.31	325.579	6740.76	211012-41B	89.188	9.33501
211012-42A	82	6883.16	137.842	2.78804	2.7851	0.7245	3871.08	76	5303.87	139.336	-3.42077	-3.46451	0.9821	2754.27	140.495	9132.17	2087.13	8642.38	211012-42A	110.745	11.5913
211012-42B	89	7686.51	140.917	2.62073	2.64264	0.6923	3582.39	89	6024.93	138.098	-3.48272	-3.54968	0.9338	2800.93	143.789	12222.1	3522.87	13675.7	211012-42B	106.055	11.1004
211012-43A	81	9769	165.902	2.31765	2.31779	0.7406	4027.54	96	8632.08	154.588	-2.9784	-3.0013	0.9821	4253.7	131.508	11178.2	1144.36	17769.6	211012-43A	110.997	11.6177
211012-43B	96	10698.5	172.756	2.23469	2.25278	0.7728	5079.11	102	9755.91	162.755	-2.89283	-2.90688	0.7567	4901.62	120.512	10484.5	1856.06	23056.6	211012-43B	105.14	11.0047
211012-44A	107	9100.94	163.423	2.12729	2.13146	0.9177	4204.26	114	7546.42	156.297	-2.1288	-2.10894	0.5313	3711.88	400.329	40833.5	4020.72	62433.5	211012-44A	118.162	12.3676
211012-44B	93	7582.86	126.831	2.34666	2.38021	0.8694	3135.38	82	6076.9	124.375	-2.95815	-2.97263	0.6762	2218.68	112.476	11360.1	0	0	211012-44B	119.602	12.5183
211012-46A	92	8892.94	162.025	2.46419	2.4864	1.1109	5221.36	82	7479.27	151.761	-3.43914	-3.47467	0.7728	4041.36	290.775	19481.9	10330.8	27898.5	211012-46A	105.681	11.0613
211012-46B	81	8293.61	166.284	2.33553	2.367	0.9338	4731.28	79	6973.06	151.362	-3.0052	-3.00179	0.6762	3971.68	197.451	12044.5	1349.74	27944.9	211012-46B	105.144	11.0051
211012-47A	69	5864.41	141.087	2.03241	2.06539	0.8694	3484.13	62	5172.3	132.136	-2.4142	-2.42877	0.6601	2818.76	414.466	21137.8	7237.55	49948.6	211012-47A	90.687	9.49191
211012-47B	55	6014.58	140.206	1.44721	1.43604	0.5152	2744.96	56	5434.41	137.241	-1.42565	-1.40363	0.483	2524.81	178.381	9632.58	0	0	211012-47B	86.476	9.05115
211012-48A	105	8454.35	153.086	2.49374	2.51431	1.0948	4875.85	95	7315.6	146.633	-3.04403	-3.06278	0.7406	3860.56	172.53	13629.9	2592.62	23004.6	211012-48A	109.256	11.4355
211012-48B	93	8387.47	157.022	2.51127	2.50687	1.0787	4834.68	82	8125.95	150.083	-3.80186	-3.85589	0.9016	4158.19	273.448	19141.4	4457.5	23071.9	211012-48B	109.93	11.506
211012-49A	90	8563.13	172.731	2.47392	2.47982	0.8694	4965.81	89	7174.39	158.378	-2.95224	-2.95524	1.0626	4118.34	296.038	19834.5	7360.46	24061.6	211012-49A	110.343	11.5492
211012-49B	95	9102.35	158.176	2.6045	2.64593	0.9982	4871.35	96	7422.04	148.972	-3.71357	-3.7726	0.9177	4078.01	234.177	17797.4	6413.55	24897.3	211012-49B	112.981	11.8253
211012-50A	58	8411.36	147.501	1.39745	1.41697	0.5957	2923.53	70	6659.21	139.393	-1.61834	-1.49303	0.322	2820.83	224.349	16601.8	0	0	211012-50A	101.682	10.6427
211012-50B	72	6669.05	147.664	1.60874	1.6189	0.7406	3342.62	59	7671.27	142.864	-1.44273	-1.36853	0.3703	3200.53	159.365	10040	539.376	33501.6	211012-50B	102.614	10.7403
