# Supplementary material for: Testing the ion-current model for flagellar length sensing and IFT regulation
Source: eLife. 2023 Jan 13;12:e82901. doi: 10.7554/eLife.82901 (PMC9891718; doi:10.7554/eLife.82901)
Supplement: Figure 7—source data 1. [file elife-82901-fig7-data1.xlsx]

## Sheet: IFT intensity (Antero)
Name	Group ID	a	b	c	d	e
210916-01A	3	186.983	243.763	116.551	115.911	181.135
210916-02A	6	172.75	234.803	139.319	89.6687	136.265
210916-03A	1	198.33	73.3243	109.833	74.0771	186.34
210916-04B	3	136.211	136.456	192.394	107.253	139.593
210916-32B	1	216.33	203.146	162.877	160.356	155.37
210916-33A	6	154.784	142.997	228.377	224.852
210916-33B	3	177.44	232.526	119.901	149.267
210916-39A	1	156.377	129.471	157.433	109.439	171.824
210916-40A	2	212.14	133.272	162.125	136.37	126.974
210930-03A	2	195.043	257.971	205.206	226.805	169.435
210930-03B	3	159.236	169.844	241.249	182.163	246.575
210930-33A	1	116.32	180.608	96.5747	265.578	131.262
211012-04B	8	92.042	143.12	116.516	176.597	137.859
211012-12B	1	126.884	150.789	126.225	180.808
211012-15A	3	84.5248	168.031	88.9095	146.903	176.3
211012-15A	4	176.3	133.1	167.84	166.93
211012-17A	2	151.734	170.272	161.129	188.323	233.535
211012-17B	1	245.655	202.085	137.007	167.167	164.104
211012-26A	1	74.3713	75.5065	141.827	133.677	137.546
211012-27A	4	179.326	118.569	164.914	89.861
211012-28A	3	137.678	215.143	134.14	222.599	230.694
211012-28B	4	178.008	176.205	166.663	137.406	176.533
211012-43B	1	118.056	71.8277	169.537	142.068	142.045
211012-43B	2	110.037	98.0582	204.974	93.6498	103.373
211012-46A	1	95.9585	167.443	147.906	186.099	209.964
211012-46B	1	120.154	139.897	121.91	122.204	220.496
211012-48A	5	161.725	97.0988	202.585	176.071	147.463
211012-48B	5	183.699	143.5	108.997	196.143
211012-49B	3	142.787	179.146	154.365	181.876	217.335

## Sheet: Returning IFT intensity
Name	Group ID	a	b	c	d	e
210916-01A	3	131.451	207.692	53.441	55.2138	165.261
210916-02A	6	131.342	163.068	248.769	120.229	84.4673
210916-03A	1	101.056	132.698	133.256	75.44	167.89
210916-04B	3	138.67	72.8171	170.438	76.3168	35.9053
210916-32B	1	170.258	136.314	167.276	59.8368	150.345
210916-33A	6	180.27	46.1947	191.076	42.2365
210916-33B	3	126.392	118.419	238.723	123.569
210916-39A	1	142.484	29.6986	225.89	59.37	100.334
210916-40A	2	141.172	94.5123	137.192	93.6379	125.486
210930-03A	2	231.646	253.092	236.901	188.819	375.78
210930-03B	3	195.91	190.762	196.812	246.61	170.381
210930-33A	1	68.7462	98.5158	202.906	121.137	112.922
211012-04B	8	44.2884	128.456	158.763	126.24	82.7813
211012-12B	1	144.671	144.245	142.216	168.962
211012-15A	3	195.694	94.3903	182.543	241.574	119.183
211012-15A	4	149.645	120.911	129.573	115.869
211012-17A	2	103.383	32.4857	161.893	90.6816	147.246
211012-17B	1	172.807	148.913	175.13	156.773	233.145
211012-26A	1	133.939	66.409	169.246	129.188	125.851
211012-27A	4	84.7449	28.1883	111.804	83.2157
211012-28A	3	159.674	31.9129	212.188	119.592	117.287
211012-28B	4	172.37	144.374	144.235	166.51	65.0464
211012-43B	1	131.994	33.0042	98.4241	91.6548	124.227
211012-43B	2	98.5389	125.521	47.7149	111.567	152.791
211012-46A	1	65.9495	33.0493	100.264	115.362	115.308
211012-46B	1	97.3872	41.9127	151.85	84.2511	172.463
211012-48A	5	112.561	29.0416	87.3351	138.191	52.934
211012-48B	5	32.0277	34.2304	112.54	161.292
211012-49B	3	61.3945	0	105.988	110.578	195.371

## Sheet: Frequency (Antero)
Name	Group ID	a	b	c	d	e
210916-01A	3	0.60375	0.805	0.4025	0.4025	0.60375
210916-02A	6	0.805	1.00625	0.60375	0.4025	0.60375
210916-03A	1	1.00625	0.4025	0.60375	0.4025	1.00625
210916-04B	3	0.60375	0.60375	1.00625	0.60375	0.805
210916-32B	1	1.2075	1.2075	1.00625	1.00625	1.00625
210916-33A	6	0.60375	0.60375	1.00625	1.00625
210916-33B	3	0.805	1.00625	0.60375	0.805
210916-39A	1	0.805	0.805	0.805	0.60375	1.00625
210916-40A	2	1.2075	0.805	1.00625	0.805	0.805
210930-03A	2	0.60375	0.805	0.805	0.805	0.60375
210930-03B	3	0.60375	0.60375	1.00625	0.805	1.00625
210930-33A	1	0.60375	1.00625	0.60375	1.61	0.805
211012-04B	8	0.4025	0.60375	0.60375	0.805	0.60375
211012-12B	1	0.805	1.00625	0.805	1.2075
211012-15A	3	0.4025	1.00625	0.60375	0.805	1.00625
211012-15A	4	1.00625	0.805	1.00625	1.00625
211012-17A	2	0.805	1.00625	1.00625	1.2075	1.40875
211012-17B	1	1.2075	1.00625	0.805	1.00625	1.00625
211012-26A	1	0.4025	0.4025	0.805	0.805	0.805
211012-27A	4	1.2075	0.805	1.2075	0.60375
211012-28A	3	0.805	1.2075	0.805	1.40875	1.40875
211012-28B	4	1.00625	1.00625	1.00625	0.805	1.00625
211012-43B	1	0.60375	0.4025	1.00625	0.805	0.805
211012-43B	2	0.60375	0.60375	1.2075	0.60375	0.60375
211012-46A	1	0.60375	1.00625	1.00625	1.2075	1.40875
211012-46B	1	0.60375	0.805	0.805	0.805	1.40875
211012-48A	5	1.00625	0.60375	1.40875	1.2075	1.00625
211012-48B	5	1.00625	0.805	0.805	1.40875
211012-49B	3	0.805	1.00625	1.00625	1.2075	1.40875

## Sheet: Frequency (Retro)
Name	Group ID	a	b	c	d	e
210916-01A	3	0.60375	0.60375	0.4025	0.20125	0.805
210916-02A	6	0.60375	0.805	1.00625	0.60375	0.20125
210916-03A	1	1.40875	1.2075	1.00625	0.20125	0.805
210916-04B	3	1.00625	0.60375	0.805	0.60375	0.60375
210916-32B	1	0.805	0.805	0.4025	0.805	0.60375
210916-33A	6	0.60375	0.4025	0.4025	1.00625
210916-33B	3	0.60375	0.60375	1.00625	1.00625
210916-39A	1	0.4025	0.20125	0.60375	0.60375	0.4025
210916-40A	2	0.805	0.805	0.60375	1.00625	1.00625
210930-03A	2	1.00625	1.00625	1.00625	0.805	1.40875
210930-03B	3	1.2075	1.2075	1.2075	1.00625	1.61
210930-33A	1	0.805	0.60375	1.00625	0.4025	0.4025
211012-04B	8	0.4025	0.60375	1.00625	0.60375	0.20125
211012-12B	1	0.805	1.40875	1.2075	1.2075
211012-15A	3	1.61	1.40875	1.61	1.40875	0.805
211012-15A	4	0.805	0.805	1.00625	0.805
211012-17A	2	1.40875	0.805	1.40875	1.2075	1.40875
211012-17B	1	0.805	1.00625	1.2075	1.40875	1.2075
211012-26A	1	1.2075	0.60375	0.805	0.805	0.4025
211012-27A	4	1.2075	0.805	1.2075	1.40875
211012-28A	3	0.805	0.60375	1.61	0.4025	1.00625
211012-28B	4	0.805	0.805	0.4025	0.60375	1.2075
211012-43B	1	1.2075	1.00625	0.4025	0.805	0.805
211012-43B	2	1.00625	0.805	0.20125	0.60375	0.4025
211012-46A	1	0.4025	0.20125	1.00625	0.805	0.60375
211012-46B	1	0.805	0.60375	0.60375	1.00625	0.805
211012-48A	5	0.60375	0.60375	0.60375	1.00625	0.60375
211012-48B	5	0.805	0.805	0.20125	0.805
211012-49B	3	1.00625	0.4025	0.4025	0.805	1.40875

## Sheet: IFT speed (Antero)
Name	Group ID	a	b	c	d	e
210916-01A	3	0.802983	1.29264	1.16699	0.853016	1.0102
210916-02A	6	0.961107	0.677954	1.20589	1.35987	1.2759
210916-03A	1	1.97275	1.63618	1.367	1.60068	1.62608
210916-04B	3	2.07077	1.5289	1.98826	1.99473	1.77953
210916-32B	1	1.7806	1.73503	1.9307	1.51557	1.79022
210916-33A	6	1.21807	1.42618	1.46418	1.93455
210916-33B	3	0.910113	1.05801	1.25746	1.37658
210916-39A	1	2.13182	1.59415	1.44041	1.46847	1.65485
210916-40A	2	2.1212	2.14238	2.31932	2.29043	2.40955
210930-03A	2	1.86398	1.52174	1.78895	1.82615	1.745
210930-03B	3	1.98085	1.84851	2.06123	2.15505	2.15535
210930-33A	1	1.47992	1.74023	2.00379	2.12015	1.64607
211012-04B	8	0.701134	1.20551	0.977111	0.963904	1.36714
211012-12B	1	1.87173	1.91443	2.24558	2.21643
211012-15A	3	1.96859	2.17748	2.15236	1.87152	2.15039
211012-15A	4	2.16911	2.16022	2.22747	2.46979
211012-17A	2	2.04864	2.25211	2.54425	2.82374	2.72899
211012-17B	1	2.31664	1.92164	2.24773	2.92786	2.50985
211012-26A	1	1.18224	2.01708	1.66765	2.25615	2.05913
211012-27A	4	2.45354	2.20588	2.51798	2.39037
211012-28A	3	2.87562	2.71864	2.904	3.16711	2.56977
211012-28B	4	2.36356	1.92283	2.54387	2.19502	2.30222
211012-43B	1	2.27579	1.7215	2.03367	2.15871	2.01937
211012-43B	2	1.98523	1.95665	2.25278	2.36578	2.01491
211012-46A	1	1.72035	1.39842	2.5355	2.82593	2.76694
211012-46B	1	1.42122	1.59063	2.0012	2.75691	2.52316
211012-48A	5	2.57919	2.2147	2.67076	2.51392	2.28004
211012-48B	5	1.96124	1.78714	2.29919	2.91912
211012-49B	3	2.17611	1.82486	2.57	2.94044	3.03759

## Sheet: IFT speed (Retro)
Name	Group ID	a	b	c	d	e
210916-01A	3	0.940928	1.21315	1.02005	0.795271	1.23031
210916-02A	6	1.60292	1.53279	2.12177	1.36781	1.35177
210916-03A	1	2.24509	3.32796	2.85814	1.89453	2.49375
210916-04B	3	1.42627	1.69851	2.01398	1.31847	1.80996
210916-32B	1	2.19685	1.92275	2.06161	2.97319	2.24287
210916-33A	6	2.04874	1.4893	1.35249	1.22155
210916-33B	3	1.49476	1.3325	1.75764	1.12463
210916-39A	1	2.18487	0.970917	1.5689	1.68105	1.38493
210916-40A	2	2.00052	2.16585	1.91986	2.2169	2.44449
210930-03A	2	1.91191	2.30376	2.76004	2.39836	2.52863
210930-03B	3	2.3264	2.49091	2.61956	2.69279	2.3307
210930-33A	1	1.98056	2.52323	3.97219	3.2901	2.55983
211012-04B	8	0.681566	0.795295	1.06699	0.598813	0.647023
211012-12B	1	3.47531	3.55218	3.25726	3.42565
211012-15A	3	2.94135	3.50497	3.3739	3.859	3.70932
211012-15A	4	3.8429	2.48137	3.02608	2.72197
211012-17A	2	2.34012	2.57705	3.88415	4.74466	3.26385
211012-17B	1	2.54551	2.70986	4.07329	4.31892	3.75298
211012-26A	1	2.34549	1.99717	3.10369	1.99364	2.11693
211012-27A	4	2.4387	2.63677	3.02043	2.69767
211012-28A	3	3.75924	3.66419	4.78036	3.49764	3.27598
211012-28B	4	2.29705	2.35188	3.67088	2.76979	2.30755
211012-43B	1	3.08272	2.89781	2.82401	2.32841	1.96657
211012-43B	2	2.29962	2.60065	2.22934	1.80898	2.552
211012-46A	1	1.83264	1.76478	3.69762	4.12725	3.72217
211012-46B	1	1.69625	2.33682	3.11044	3.43615	3.41419
211012-48A	5	2.71781	2.31737	2.96419	2.14756	2.60915
211012-48B	5	2.39197	3.19027	3.83317	5.00445
211012-49B	3	2.28768	1.8737	4.12953	3.83952	3.93107

## Sheet: Calcium intensity
Name	Group ID	a	b	c	d	e
210916-01A	3	0	0	2617.25	0	0
210916-02A	6	0	0	9086.36	5609.76	13976.3
210916-03A	1	0	0	13645.8	0	0
210916-04B	3	0	0	19390.6	0	13939.7
210916-32B	1	0	0	26250.8	0	0
210916-33A	6	0	0	5378.96	0
210916-33B	3	0	0	6412.71	0
210916-39A	1	0	0	7430.82	2887.87	0
210916-40A	2	0	0	10401.1	0	0
210930-03A	2	0	0	8562.09	3721.54	5967.89
210930-03B	3	0	0	9551.19	17343.8	7983.44
210930-33A	1	0	0	18233.7	1954.15	0
211012-04B	8	0	0	4769.93	0	0
211012-12B	1	0	0	4965.72	1876.39
211012-15A	3	0	0	8200.87	0	0
211012-15A	4	0	0	8080.44	2755.13
211012-17A	2	0	0	35641.9	9591.45	0
211012-17B	1	0	0	20340.7	8495.1	0
211012-26A	1	0	0	9233.73	3945.44	0
211012-27A	4	0	0	9274.56	0
211012-28A	3	0	0	48753.2	4230.99	9520.8
211012-28B	4	0	0	5509.17	0	0
211012-43B	1	0	0	5788.89	0	0
211012-43B	2	0	0	7469.84	0	9942
211012-46A	1	0	0	33412.4	31189	26378.7
211012-46B	1	0	0	10078.7	0	0
211012-48A	5	0	0	6610.1	3286.84	0
211012-48B	5	0	0	23760.8	6685.5
211012-49B	3	0	0	16618.1	3848.05	0

## Sheet: Background
Name	Group ID	a	b	c	d	e
210916-01A	3	223.552	228.81	205.282	194.992	192.286
210916-02A	6	172.943	171.002	173.059	176.366	177.262
210916-03A	1	144.647	140.771	141.28	146.098	145.851
210916-04B	3	157.485	176.795	154.865	147.737	146.057
210916-32B	1	147.731	138.894	132.515	129.69	133.445
210916-33A	6	176.24	176.607	161.143	169.336
210916-33B	3	188.84	180.671	171.099	154.784
210916-39A	1	165.708	168.121	154.471	148.76	145.584
210916-40A	2	136.825	130.037	131.969	130.807	130.896
210930-03A	2	185.179	201.209	194.187	173.285	175.617
210930-03B	3	150.805	161.2	149.641	149.115	155.768
210930-33A	1	158.92	161.658	135.514	134.841	134.458
211012-04B	8	165.63	162.787	165.704	170.827	176.297
211012-12B	1	121.694	120.316	120.064	119.729
211012-15A	3	133.005	134.877	129.283	129.362	128.784
211012-15A	4	128.523	130.471	130.435	128.535
211012-17A	2	144.302	144.813	124.996	121.348	126.198
211012-17B	1	144.753	146.189	127.437	128.195	127.815
211012-26A	1	144.948	145.917	139.578	134.122	143.73
211012-27A	4	129.657	129.73	121.836	120.184
211012-28A	3	128.063	131.831	124.706	121.718	126.442
211012-28B	4	150.53	160.639	130.173	139.152	139.454
211012-43B	1	143.033	141.385	133.945	132.483	136.508
211012-43B	2	144.875	144.976	132.175	135.871	135.569
211012-46A	1	139.439	143.693	123.991	121.243	122.224
211012-46B	1	148.805	138.188	120.403	118.532	123.807
211012-48A	5	126.078	133.985	122.294	126.718	123.225
211012-48B	5	141.418	147.281	115.179	115.308
211012-49B	3	133.741	142.389	121.255	117.7	119.687
