# Supplementary figures and images for: Testing the ion-current model for flagellar length sensing and IFT regulation
Source: eLife journal article supplement (doi:10.7554/elife.82901), 2023-01-13

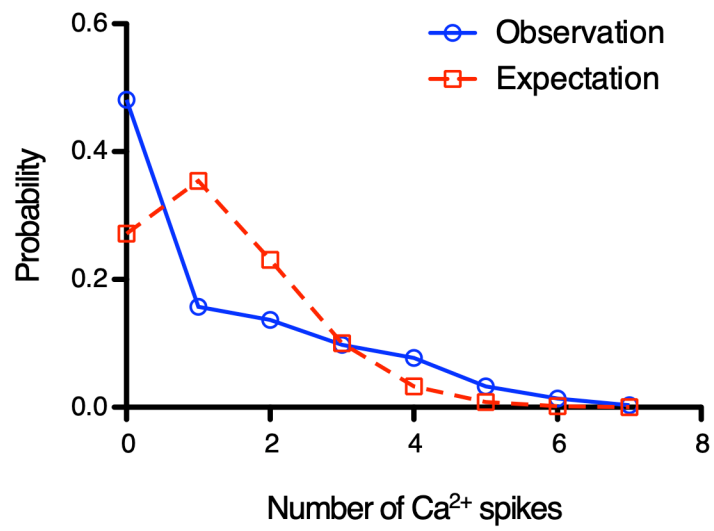

Supplement: supp [file elife-82901-supp-v1.zip]

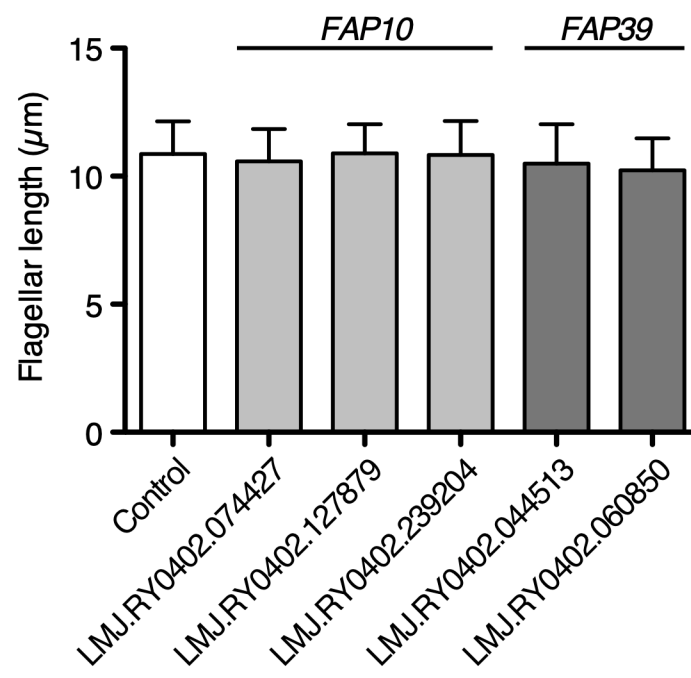

Supplement: supp [file elife-82901-supp-v1.zip]

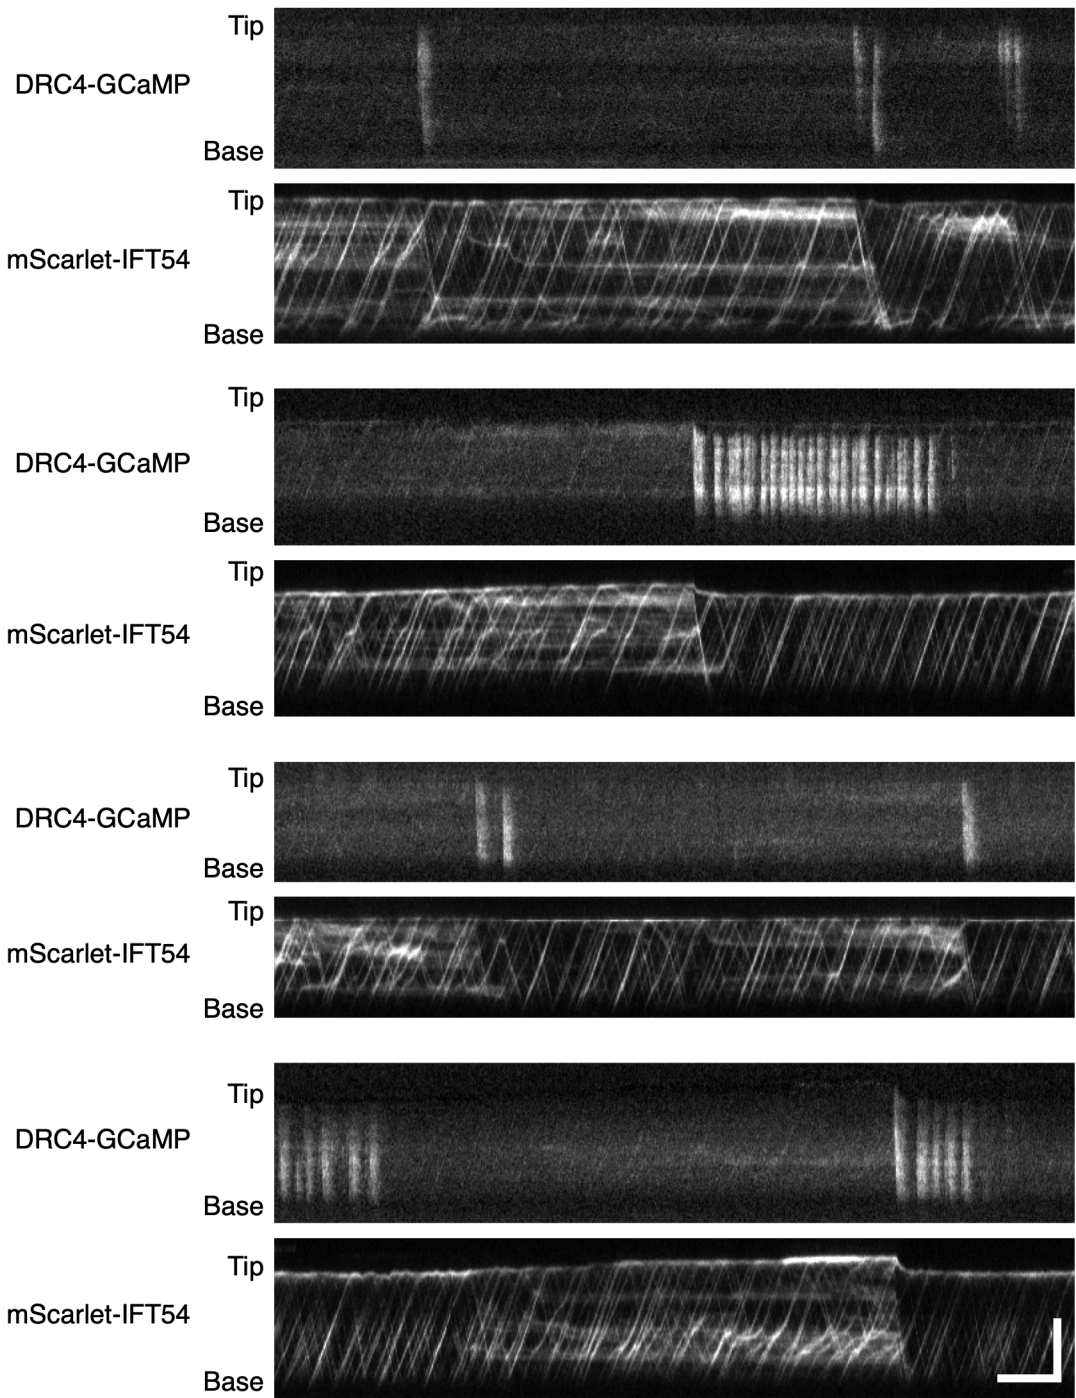

Supplement: supp [file elife-82901-supp-v1.zip]
